# Supplementary material for: Copper-catalyzed atroposelective synthesis of C–O axially chiral compounds enabled by chiral 1,8-naphthyridine based ligands
Source: Royal Society of Chemistry journal article supplement (doi:10.1039/d4sc01074d), 2024-01-01
Supplement: d4sc01074d1.pdf [file d4sc01074d1.pdf]

## *Electronic Supplementary Information*

### **Copper-catalyzed atroposelective synthesis of C–O axially chiral compounds enabled by chiral 1,8-naphthyridine based ligands**

Lei Dai,<sup>ac</sup> Xueting Zhou,<sup>ab</sup> Jiami Guo,<sup>ab</sup> Qingqin Huang<sup>ab</sup> and Yixin Lu<sup>\*ab</sup>

<sup>a</sup>Department of Chemistry, National University of Singapore, 3 Science Drive 3, Singapore, 117543, Singapore.

<sup>b</sup>Joint School of National University of Singapore and Tianjin University, International Campus of Tianjin University, Binhai New City, Fuzhou, Fujian, 350207, China.

<sup>c</sup>Chongqing Key Laboratory of Natural Product Synthesis and Drug Research, School of Pharmaceutical Sciences, Chongqing University, Chongqing, 401331, China.

\*Corresponding author: Y. Lu, Email: [chmlyx@nus.edu.sg](mailto:chmlyx@nus.edu.sg)

## Contents

|                                                                            |     |
|----------------------------------------------------------------------------|-----|
| 1. Materials and Methods.....                                              | 3   |
| 2. Synthesis of Chiral 1,8-Naphthyridine Based Ligands.....                | 3   |
| 3. Synthesis of Substrates .....                                           | 6   |
| 4. General Procedure for the Asymmetric CuAACs.....                        | 12  |
| 5. Analytical Data and HPLC Chromatograms of the Products <b>3</b> . ..... | 13  |
| 6. Synthetic Applications .....                                            | 61  |
| 7. Mechanistic Studies .....                                               | 72  |
| 8. Single Crystal Structure X-ray Analysis of <b>3w</b> .....              | 75  |
| 9. NMR Spectra .....                                                       | 92  |
| 10. References.....                                                        | 168 |

## 1. Materials and Methods

All starting materials were obtained from commercial suppliers (Sigma Aldrich and TCI) and directly used without further purification unless otherwise stated. All reactions were carried out under argon atmosphere with magnetic stirring. Substrates were synthesized according to literatures.<sup>1-6</sup> CuTC was purchased from TCI.

Analytical thin layer chromatography was carried out with silica gel pre-coated glass plates (TLC-Silica gel GF254, coating thickness: 0.25 mm) purchased from Merck. Visualization was accomplished with short wave UV light (254nm, 365nm) and/or 10% phosphomolybdic acid in ethanol or KMnO<sub>4</sub> staining solutions followed by heating. Column chromatography was performed on silica gel 200~300 mesh. <sup>1</sup>H NMR and <sup>13</sup>C NMR spectra were recorded on a Bruker AV-III400 (400 MHz) spectrometer. Chemical shifts were calibrated using residual solvent as an internal reference (CDCl<sub>3</sub>: 7.18 ppm <sup>1</sup>H NMR, 77.00 ppm <sup>13</sup>C NMR). <sup>1</sup>H NMR Spectroscopy splitting patterns were designated as singlet (s), doublet (d), triplet (t), quartet (q). Splitting patterns that could not be interpreted or easily visualized were designated as multiplet (m) or broad (br). All high-resolution mass spectra (HRMS) were obtained on a Finnigan/MAT 95XL-T spectrometer, the calculated values are based on the most abundant isotope. Chiral HPLC analyses were performed on an Agilent 1100 Series using a Daicel Chiralpak column (IC and IE) with hexanes/iPrOH as the eluent.

## 2. Synthesis of Chiral 1,8-Naphthyridine Based Ligands

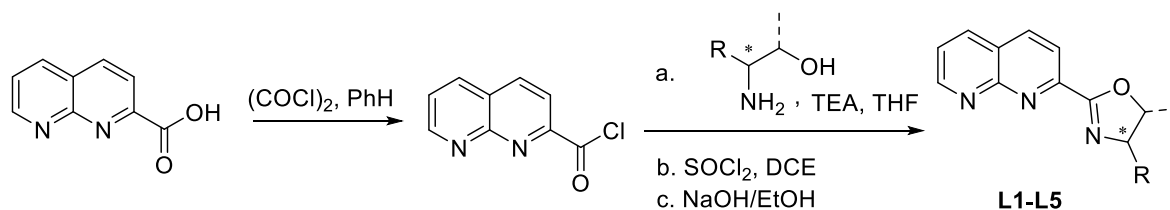

To a suspension of 1,8-naphthyridine-2-carboxylic acid (2 g, 11 mmol) in dry benzene (60 mL), was added oxalyl chloride (1.4 mL, 17 mmol) drop wisely at 0 °C. Then three drops of DMF were added. It was then slowly brought to room temperature and heated at 65 °C for 3 h until the gas evolution subsided. The solvent and excess oxalyl chloride was removed under reduced pressure to afford the derived products, which was directly used for the next step without further purification.

Chiral amino alcohol (11 mmol) was dissolved in dry THF (120 mL) and the solution was chilled to 0 °C. Then, triethylamine (3.9 mL, 0.028 mol) was added to the solution. Subsequently, a suspension of 1,8-naphthyridine-2-carbonyl chloride in dry THF was added portion wise during 30 min. Then the mixture was slowly brought to room temperature and stirred at room temperature for additional 24 h. After that it was evaporated, taken in dichloromethane and extracted with saturated aqueous sodium bicarbonate solution. After further extraction of the aqueous phase with dichloromethane, the combined organic phases were dried over anhydrous Na<sub>2</sub>SO<sub>4</sub> and evaporated again to get a brown residue. The residue was then purified by silica gel column chromatography using ethyl acetate/hexane as eluent to obtain the corresponding products. To a solution of above-mentioned product (6.8 mmol) in dry DCE (60 mL), SOCl<sub>2</sub> (5 mL, 68.2 mmol) was added drop wise at room temperature and the resulting mixture was refluxed for 3 h until the gas evolution subsided. Then, it was cooled to room temperature and solvent and excess SOCl<sub>2</sub> were removed under reduced pressure. The residue was taken in dichloromethane and extracted cautiously with saturated aqueous solution of Na<sub>2</sub>CO<sub>3</sub>. The combined organic phase was dried over anhydrous Na<sub>2</sub>SO<sub>4</sub> and evaporated to obtain a brown residue which was purified by silica gel column chromatography using 50% ethyl acetate/petroleum ether as eluent. To a solution of above-mentioned product (5.1 mmol) in dry ethanol (50 mL), 5.6 mL of 1N ethanolic NaOH (5.6 mmol) solution was added drop wise and the solution was refluxed for 3 h under N<sub>2</sub> atmosphere. Then the solvent was removed by rotary evaporation and the residue was passed through a column packed with silica gel using 5% MeOH/DCM as eluent. Chiral ligands (**L1-L5**) were obtained.

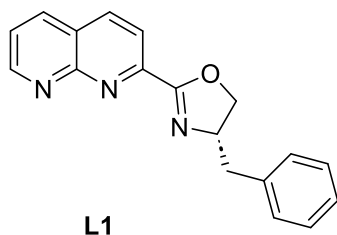

**(S)-4-Benzyl-2-(1,8-naphthyridin-2-yl)-4,5-dihydrooxazole (L1)**

79% yield;  $[\alpha]_D^{25} = -12.4$  (c 0.5, CHCl<sub>3</sub>), a white solid. <sup>1</sup>H NMR (400 MHz, CDCl<sub>3</sub>) δ 9.20 (d, *J* = 2.4 Hz, 1H), 8.48 – 8.18 (m, 3H), 7.55 (dd, *J* = 8.1, 4.2 Hz, 1H), 7.41 – 7.18 (m, 5H), 4.83 – 4.67 (m, 1H), 4.55 (t, *J* = 9.1 Hz, 1H), 4.33 (t, *J* = 8.2 Hz, 1H), 3.30 (dd, *J* = 13.8, 5.4 Hz, 1H), 2.84 (dd, *J* = 13.8, 8.6 Hz, 1H). <sup>13</sup>C NMR (101 MHz, CDCl<sub>3</sub>) δ 163.4, 155.4, 154.5, 149.9, 137.9, 137.7,

136.7, 129.3, 128.6, 126.7, 123.6, 123.2, 121.9, 72.7, 68.3, 41.7. HRMS (ESI)  $m/z$  calcd for  $C_{18}H_{16}N_3O$   $[M+H]^+ = 290.1288$ , found = 290.1290.

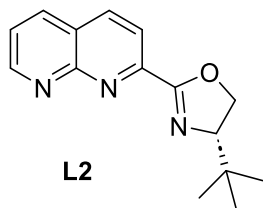

**(S)-4-(tert-Butyl)-2-(1,8-naphthyridin-2-yl)-4,5-dihydrooxazole (L2)**

74% yield;  $[\alpha]_D^{25} = -119.2$  (c 0.5,  $CHCl_3$ ), a white solid.  $^1H$  NMR (400 MHz,  $CDCl_3$ )  $\delta$  9.19 (dd,  $J = 4.2, 2.0$  Hz, 1H), 8.35 (d,  $J = 8.3$  Hz, 1H), 8.27 (d,  $J = 8.4$  Hz, 1H), 8.23 (dd,  $J = 8.2, 2.0$  Hz, 1H), 7.54 (dd,  $J = 8.1, 4.2$  Hz, 1H), 4.54 (dd,  $J = 10.3, 8.8$  Hz, 1H), 4.40 (t,  $J = 8.6$  Hz, 1H), 4.19 (dd,  $J = 10.3, 8.4$  Hz, 1H), 1.01 (s, 9H).  $^{13}C$  NMR (101 MHz,  $CDCl_3$ )  $\delta$  162.8, 155.4, 154.4, 150.1, 137.7, 136.6, 123.6, 123.0, 122.0, 76.7, 69.6, 34.1, 26.0. HRMS (ESI)  $m/z$  calcd for  $C_{15}H_{18}N_3O$   $[M+H]^+ = 256.1444$ , found = 256.1448.

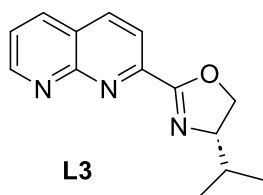

**(S)-4-Isopropyl-2-(1,8-naphthyridin-2-yl)-4,5-dihydrooxazole (L3)**

84% yield;  $[\alpha]_D^{25} = -92.6$  (c 0.5,  $CHCl_3$ ), a white solid.  $^1H$  NMR (400 MHz,  $CDCl_3$ )  $\delta$  9.11 (dd,  $J = 4.2, 2.0$  Hz, 1H), 8.48 – 8.13 (m, 3H), 7.49 (ddd,  $J = 18.6, 8.1, 4.2$  Hz, 1H), 4.61 – 3.75 (m, 3H), 2.12 – 1.76 (m, 1H), 1.06 – 0.87 (m, 6H).  $^{13}C$  NMR (101 MHz,  $CDCl_3$ )  $\delta$  162.9, 155.4, 154.5, 154.4, 150.1, 138.9, 137.8, 137.3, 136.7, 123.6, 123.2, 123.1, 122.0, 120.3, 71.0, 58.1, 32.9, 19.0, 18.3. HRMS (ESI)  $m/z$  calcd for  $C_{14}H_{16}N_3O$   $[M+H]^+ = 242.1288$ , found = 242.1289.

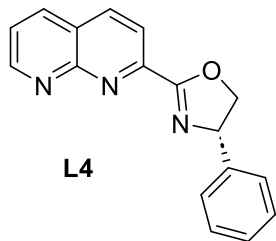

**(S)-2-(1,8-Naphthyridin-2-yl)-4-phenyl-4,5-dihydrooxazole (L4)**

65% yield;  $[\alpha]_D^{25} = -151.0$  (c 0.5,  $\text{CHCl}_3$ ), a white solid.  $^1\text{H}$  NMR (400 MHz,  $\text{CDCl}_3$ )  $\delta$  9.14 (dd,  $J = 4.2, 2.0$  Hz, 1H), 8.33 (d,  $J = 8.4$  Hz, 1H), 8.23 (d,  $J = 8.4$  Hz, 1H), 8.17 (dd,  $J = 8.2, 2.0$  Hz, 1H), 7.49 (dd,  $J = 8.2, 4.2$  Hz, 1H), 7.29 (s, 5H), 5.45 (dd,  $J = 10.4, 8.6$  Hz, 1H), 4.91 (dd,  $J = 10.4, 8.6$  Hz, 1H), 4.40 (t,  $J = 8.6$  Hz, 1H).  $^{13}\text{C}$  NMR (101 MHz,  $\text{CDCl}_3$ )  $\delta$  164.2, 155.4, 154.5, 149.8, 141.7, 138.0, 136.7, 128.9, 128.9, 127.9, 127.1, 126.9, 123.7, 123.2, 122.1, 75.6, 70.6. HRMS (ESI)  $m/z$  calcd for  $\text{C}_{17}\text{H}_{14}\text{N}_3\text{O}$   $[\text{M}+\text{H}]^+ = 276.1131$ , found = 276.1132.

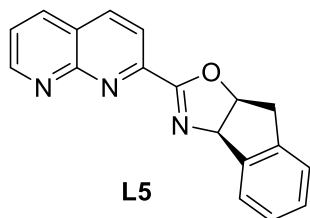

**(3aR, 8aS)-2-(1,8-Naphthyridin-2-yl)-3a,8a-dihydro-8H-indeno[1,2-d]oxazole (L5)**

68% yield;  $[\alpha]_D^{25} = +395.0$  (c 0.5,  $\text{CHCl}_3$ ), a white solid.  $^1\text{H}$  NMR (400 MHz,  $\text{CDCl}_3$ )  $\delta$  9.08 (dd,  $J = 4.2, 2.0$  Hz, 1H), 8.25 – 8.07 (m, 3H), 7.55 – 7.48 (m, 1H), 7.44 (dd,  $J = 8.1, 4.2$  Hz, 1H), 7.24 – 7.12 (m, 4H), 5.79 (d,  $J = 8.0$  Hz, 1H), 5.59 (dt,  $J = 8.2, 4.3$  Hz, 1H), 3.47 (d,  $J = 4.3$  Hz, 2H).  $^{13}\text{C}$  NMR (101 MHz,  $\text{CDCl}_3$ )  $\delta$  163.5, 155.4, 154.4, 150.0, 141.4, 140.1, 137.7, 136.6, 128.7, 127.5, 125.6, 125.5, 123.5, 123.1, 122.1, 84.2, 77.3, 39.8. HRMS (ESI)  $m/z$  calcd for  $\text{C}_{18}\text{H}_{14}\text{N}_3\text{O}$   $[\text{M}+\text{H}]^+ = 288.1131$ , found = 288.1131.

### 3. Synthesis of Substrates

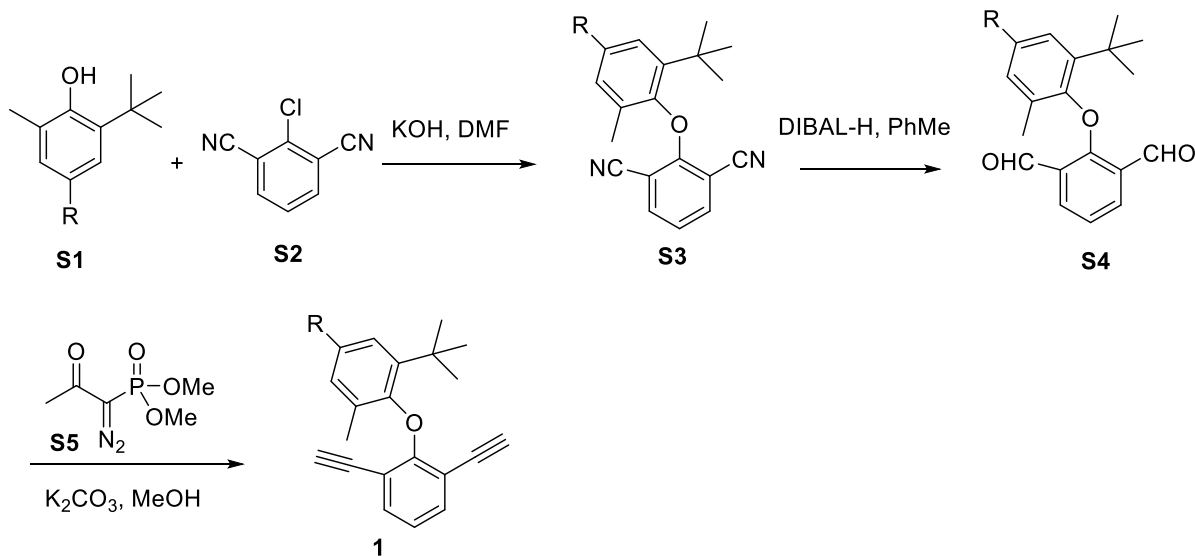

The mixture of phenol **S1** (10 mmol, 1 equiv) and KOH (10 mmol, 1 equiv) in toluene (30 mL) in egg-plant bottle installed with water separator was stirred at 130 °C for 4 h. After removal of the solvent of toluene under reduced pressure, it was added 2-chloro-1,3-dicyanobenzene **S2** (10mmol, 1 equiv) and anhydrous DMF (60 mL). The reaction mixture was stirred under N<sub>2</sub> at 150 °C for 16 h. Solvent were removed under reduced pressure, and the residue was extracted with EA for 3 times. The combined organics was washed with water for 3 times, dried over Na<sub>2</sub>SO<sub>4</sub>, and solvent removed under reduced pressure. The residue was purified by flash column chromatography (PE/EA = 10:1) to yield 2-aryloxy-1,3-dicyanobenzene **S3**.

To the solution of 2-aryloxy-1,3-dicyanobenzene **S3** was slowly added DIBAL-H (1.5M solution in toluene, 2.5 equiv) in anhydrous toluene (30 mL) under N<sub>2</sub> at -78 °C and then stirred for 1h at this temperature. The reaction mixture was allowed to warm to room temperature and stirred 16 h. The reaction mixture was cooled to 0 °C and added slowly 5M HCl. After stirring for 2h, the mixture was extracted 3 times with EA and the combined organics was washed with brine. The organics was dried over Na<sub>2</sub>SO<sub>4</sub>, and solvent was removed under reduced pressure. The residue was purified by flash column chromatography (PE/EA = 50:1) to yield 2-aryloxyisophthalaldehydes **S4**.

To a stirred solution of **S4** (5 mmol, 1.0 equiv.) and K<sub>2</sub>CO<sub>3</sub> (20 mmol, 4.0 equiv.) in MeOH (20 mL), **S5** (15 mmol, 3.0 equiv.) was added at room temperature. After the completion of the reaction, the reaction mixture was quenched with water. The reaction mixture was then diluted with EA. The separated organic layer was washed with brine, dried over Na<sub>2</sub>SO<sub>4</sub>, filtered and concentrated under reduced pressure. The residue was purified by column chromatography to obtain **1**.

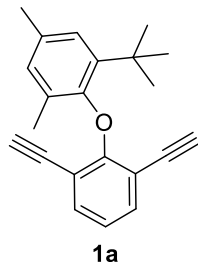

**1-(*tert*-Butyl)-2-(2,6-diethynylphenoxy)-3,5-dimethylbenzene (1a)**

58% yield; a white solid.  $^1\text{H}$  NMR (400 MHz,  $\text{CDCl}_3$ )  $\delta$  7.34 (d,  $J = 7.7$  Hz, 2H), 6.88 (d,  $J = 2.0$  Hz, 1H), 6.81 (t,  $J = 7.7$  Hz, 1H), 6.70 – 6.64 (m, 1H), 2.90 (s, 2H), 2.23 (s, 3H), 1.85 (s, 3H), 1.32 (s, 9H).  $^{13}\text{C}$  NMR (101 MHz,  $\text{CDCl}_3$ )  $\delta$  159.4, 151.1, 141.8, 135.7, 133.8, 130.5, 128.8, 125.0, 120.9, 111.9, 82.5, 78.7, 35.0, 30.7, 21.1, 17.2. HRMS (ESI)  $m/z$  calcd for  $\text{C}_{22}\text{H}_{23}\text{O}$   $[\text{M}+\text{H}]^+ = 303.1743$ , found = 303.1747.

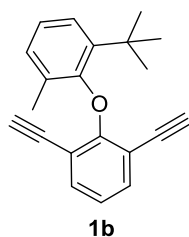

**1-(*tert*-Butyl)-2-(2,6-diethynylphenoxy)-3-methylbenzene (1b)**

64% yield; a white solid.  $^1\text{H}$  NMR (400 MHz,  $\text{CDCl}_3$ )  $\delta$  7.35 (d,  $J = 7.7$  Hz, 2H), 7.08 (dd,  $J = 7.9$ , 1.7 Hz, 1H), 6.95 (t,  $J = 7.6$  Hz, 1H), 6.89 – 6.79 (m, 2H), 2.90 (s, 2H), 1.88 (s, 3H), 1.33 (s, 9H).  $^{13}\text{C}$  NMR (101 MHz,  $\text{CDCl}_3$ )  $\delta$  159.2, 153.4, 142.2, 135.7, 130.9, 128.5, 124.6, 124.3, 121.1, 111.9, 82.5, 78.6, 35.1, 30.6, 17.3. HRMS (ESI)  $m/z$  calcd for  $\text{C}_{21}\text{H}_{21}\text{O}$   $[\text{M}+\text{H}]^+ = 289.1587$ , found = 289.1585.

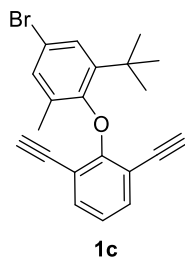

**5-Bromo-1-(*tert*-butyl)-2-(2,6-diethynylphenoxy)-3-methylbenzene (1c)**



73% yield; a white solid.  $^1\text{H}$  NMR (400 MHz,  $\text{CDCl}_3$ )  $\delta$  7.35 (d,  $J = 7.7$  Hz, 2H), 7.20 (d,  $J = 2.4$  Hz, 1H), 7.02 (d,  $J = 2.2$  Hz, 1H), 6.84 (t,  $J = 7.7$  Hz, 1H), 2.96 (s, 2H), 1.85 (s, 3H), 1.31 (s, 9H).  $^{13}\text{C}$  NMR (101 MHz,  $\text{CDCl}_3$ )  $\delta$  158.5, 152.4, 144.5, 135.7, 133.1, 130.9, 127.5, 121.5, 117.4, 111.9, 83.0, 78.4, 35.4, 30.4, 17.2. HRMS (ESI)  $m/z$  calcd for  $\text{C}_{21}\text{H}_{20}\text{BrO}$   $[\text{M}+\text{H}]^+ = 367.0692$ , found = 367.0697.

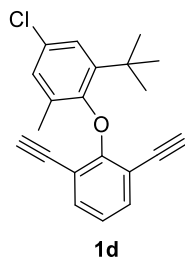

**1-(*tert*-Butyl)-5-chloro-2-(2,6-diethynylphenoxy)-3-methylbenzene (1d)**

76% yield; a white solid.  $^1\text{H}$  NMR (400 MHz,  $\text{CDCl}_3$ )  $\delta$  7.36 (d,  $J = 7.7$  Hz, 2H), 7.06 (d,  $J = 2.6$  Hz, 1H), 6.89 – 6.85 (m, 1H), 6.83 (d,  $J = 7.7$  Hz, 1H), 2.95 (s, 2H), 1.85 (s, 3H), 1.31 (s, 9H).  $^{13}\text{C}$  NMR (101 MHz,  $\text{CDCl}_3$ )  $\delta$  158.6, 151.8, 144.1, 135.7, 132.6, 129.5, 127.9, 124.6, 121.5, 111.9, 83.0, 78.5, 35.4, 30.4, 17.3. HRMS (ESI)  $m/z$  calcd for  $\text{C}_{21}\text{H}_{20}\text{ClO}$   $[\text{M}+\text{H}]^+ = 323.1197$ , found = 323.1194.

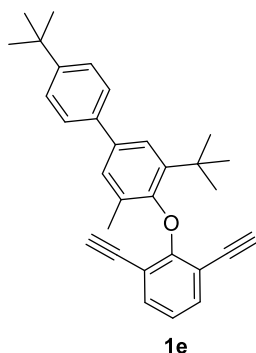

**3,4'-Di-*tert*-butyl-4-(2,6-diethynylphenoxy)-5-methyl-1,1'-biphenyl (1e)**

54% yield; a white solid.  $^1\text{H}$  NMR (400 MHz,  $\text{CDCl}_3$ )  $\delta$  7.47 (d,  $J = 8.4$  Hz, 2H), 7.42 – 7.31 (m, 5H), 7.12 – 7.09 (m, 1H), 6.83 (t,  $J = 7.7$  Hz, 1H), 2.90 (s, 2H), 1.94 (s, 3H), 1.37 (s, 9H), 1.29 (s, 9H).  $^{13}\text{C}$  NMR (101 MHz,  $\text{CDCl}_3$ )  $\delta$  159.2, 152.8, 149.9, 142.4, 137.3, 135.7, 131.1, 126.9, 126.66, 125.7, 123.3, 121.2, 112.0, 82.7, 78.7, 35.3, 34.5, 31.4, 30.7, 17.5. HRMS (ESI)  $m/z$  calcd for  $\text{C}_{31}\text{H}_{33}\text{O}$   $[\text{M}+\text{H}]^+ = 421.2526$ , found = 421.2526.

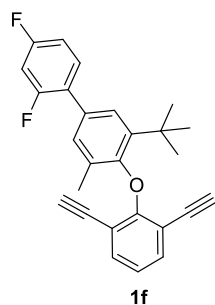

**3'-(*tert*-Butyl)-4'-(2,6-diethynylphenoxy)-2,4-difluoro-5'-methyl-1,1'-biphenyl (1f)**

46% yield; a white solid.  $^1\text{H}$  NMR (400 MHz,  $\text{CDCl}_3$ )  $\delta$  7.37 (d,  $J = 7.7$  Hz, 2H), 7.32 (td,  $J = 8.6$ , 6.4 Hz, 1H), 7.20 (d,  $J = 2.0$  Hz, 1H), 6.99 (t,  $J = 1.8$  Hz, 1H), 6.91 – 6.78 (m, 3H), 2.94 (s, 2H), 1.93 (s, 3H), 1.37 (s, 9H).  $^{13}\text{C}$  NMR (101 MHz,  $\text{CDCl}_3$ )  $\delta$  159.0, 142.3, 135.7, 131.2, 131.0, 128.9, 125.2, 121.3, 112.0, 111.4, 82.7, 78.6, 35.2, 30.6, 17.4. HRMS (ESI)  $m/z$  calcd for  $\text{C}_{27}\text{H}_{23}\text{F}_2\text{O}$   $[\text{M}+\text{H}]^+ = 401.1711$ , found = 401.1716.

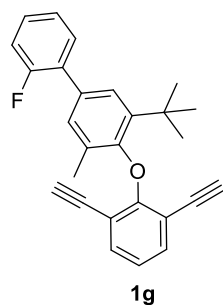

**3'-(*tert*-Butyl)-4'-(2,6-diethynylphenoxy)-2-fluoro-5'-methyl-1,1'-biphenyl (1g)**

57% yield; a white solid.  $^1\text{H}$  NMR (400 MHz,  $\text{CDCl}_3$ )  $\delta$  7.37 (d,  $J = 7.7$  Hz, 2H), 7.26 (s, 1H), 7.16 – 7.03 (m, 3H), 6.84 (t,  $J = 7.7$  Hz, 1H), 2.94 (s, 2H), 1.94 (s, 3H), 1.37 (s, 9H).  $^{13}\text{C}$  NMR (101 MHz,  $\text{CDCl}_3$ )  $\delta$  153.0, 142.2, 135.7, 132.0, 130.9, 130.7, 128.6, 125.4, 124.23, 124.19, 121.3, 115.9, 112.0, 82.8, 78.6, 35.2, 30.6, 17.4. HRMS (ESI)  $m/z$  calcd for  $\text{C}_{27}\text{H}_{24}\text{FO}$   $[\text{M}+\text{H}]^+ = 383.1806$ , found = 383.1809.

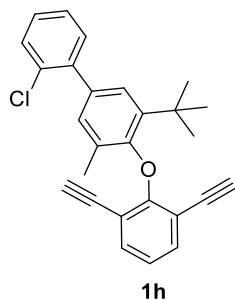

**3'-(*tert*-Butyl)-2-chloro-4'-(2,6-diethynylphenoxy)-5'-methyl-1,1'-biphenyl (1h)**

57% yield; a white solid.  $^1\text{H}$  NMR (400 MHz,  $\text{CDCl}_3$ )  $\delta$  7.39 (dd,  $J = 10.1, 7.7$  Hz, 3H), 7.32 – 7.20 (m, 3H), 7.17 (d,  $J = 2.2$  Hz, 1H), 6.97 – 6.92 (m, 1H), 6.84 (t,  $J = 7.7$  Hz, 1H), 2.98 (s, 2H), 1.94 (s, 3H), 1.37 (s, 9H).  $^{13}\text{C}$  NMR (101 MHz,  $\text{CDCl}_3$ )  $\delta$  152.8, 141.8, 140.8, 135.6, 132.6, 131.4, 130.6, 129.9, 129.3, 128.3, 126.8, 125.9, 121.2, 112.0, 82.9, 78.6, 35.2, 30.6, 17.4. HRMS (ESI)  $m/z$  calcd for  $\text{C}_{27}\text{H}_{24}\text{ClO}$   $[\text{M}+\text{H}]^+ = 399.1510$ , found = 399.1510.

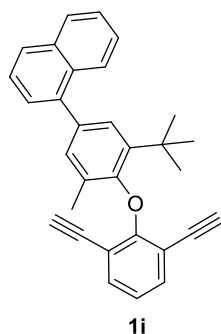

**1-(3-(*tert*-Butyl)-4-(2,6-diethynylphenoxy)-5-methylphenyl)naphthalene (1i)**

47% yield; a white solid.  $^1\text{H}$  NMR (400 MHz,  $\text{CDCl}_3$ )  $\delta$  7.90 (d,  $J = 8.3$  Hz, 1H), 7.84 (d,  $J = 7.6$  Hz, 1H), 7.78 (d,  $J = 8.2$  Hz, 1H), 7.49 – 7.35 (m, 6H), 7.23 (d,  $J = 2.0$  Hz, 1H), 7.03 (s, 1H), 6.87 (t,  $J = 7.7$  Hz, 1H), 3.01 (s, 2H), 1.97 (s, 3H), 1.39 (s, 9H).  $^{13}\text{C}$  NMR (101 MHz,  $\text{CDCl}_3$ )  $\delta$  159.1, 140.5, 136.9, 135.8, 133.9, 131.7, 130.6, 130.1, 128.4, 127.4, 126.9, 126.4, 126.0, 125.9, 125.7, 125.4, 121.3, 82.8, 78.8, 35.3, 30.7, 17.4. HRMS (ESI)  $m/z$  calcd for  $\text{C}_{31}\text{H}_{27}\text{O}$   $[\text{M}+\text{H}]^+ = 415.2056$ , found = 415.2059.

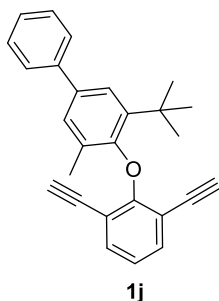

### 3-(*tert*-Butyl)-4-(2,6-diethynylphenoxy)-5-methyl-1,1'-biphenyl (**1j**)

78% yield; a white solid.  $^1\text{H NMR}$  (400 MHz,  $\text{CDCl}_3$ )  $\delta$  7.52 (d,  $J = 7.9$  Hz, 2H), 7.41 – 7.31 (m, 5H), 7.29 – 7.21 (m, 1H), 7.11 (d,  $J = 1.8$  Hz, 1H), 6.84 (t,  $J = 7.7$  Hz, 1H), 2.91 (s, 2H), 1.95 (s, 3H), 1.38 (s, 9H).  $^{13}\text{C NMR}$  (101 MHz,  $\text{CDCl}_3$ )  $\delta$  152.9, 142.4, 141.5, 137.4, 135.7, 131.2, 128.7, 127.1, 127.0, 126.9, 123.4, 121.3, 112.0, 82.8, 78.6, 35.3, 30.6, 17.5. HRMS (ESI)  $m/z$  calcd for  $\text{C}_{27}\text{H}_{25}\text{O}$   $[\text{M}+\text{H}]^+ = 365.1900$ , found = 365.1904.

## 4. General Procedure for the asymmetric CuAACs

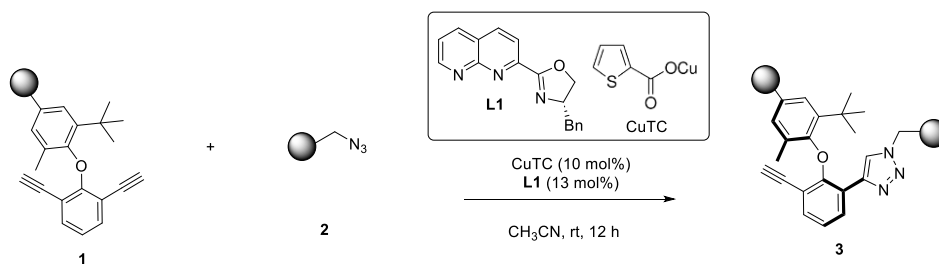

To a dried and argon-filled 10 mL Schlenk tube equipped with a magnetic stir bar was added CuTC (10 mol%) and **L1** (13 mol%) in  $\text{CH}_3\text{CN}$  (1.5 mL). The reaction mixture was stirred under at room temperature for 1 h. Then the solution of **1** (0.05 mmol, 1.0 equiv.) and **2** (0.09 mmol, 1.8 equiv.) in  $\text{CH}_3\text{CN}$  (0.5 mL) was added. The reaction mixture was stirred at room temperature for 12 h. Then the reaction mixture was concentrated under reduced pressure and the residue was purified by column chromatography on silica gel to furnish the product.

## 5. Analytical Data and HPLC Chromatograms of the Products 3.

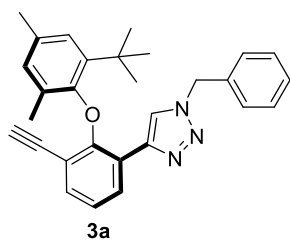

### 1-Benzyl-4-(2-(2-(tert-butyl)-4,6-dimethylphenoxy)-3-ethynylphenyl)-1H-1,2,3-triazole (3a)

76% yield;  $[\alpha]_D^{25} = -62.0$  (c 0.25,  $\text{CHCl}_3$ ), a white foam,  $R_f = 0.32$  (hexane/ethyl acetate 7:1).  $^1\text{H}$  NMR (400 MHz,  $\text{CDCl}_3$ )  $\delta$  8.41 (d,  $J = 9.4$  Hz, 1H), 7.97 (s, 1H), 7.30 – 7.21 (m, 4H), 7.18 – 7.11 (m, 2H), 6.99 (t,  $J = 7.7$  Hz, 1H), 6.89 (d,  $J = 2.1$  Hz, 1H), 6.69 (d,  $J = 2.1$  Hz, 1H), 5.59 (d,  $J = 15.0$  Hz, 1H), 5.35 (d,  $J = 15.0$  Hz, 1H), 2.57 (s, 1H), 2.24 (s, 3H), 1.72 (s, 3H), 1.18 (s, 9H).  $^{13}\text{C}$  NMR (101 MHz,  $\text{CDCl}_3$ )  $\delta$  154.1, 151.0, 141.9, 135.8, 134.8, 133.9, 130.5, 129.2, 129.1, 129.0, 128.6, 127.8, 125.3, 121.9, 121.6, 110.4, 82.8, 78.5, 54.2, 34.9, 31.0, 21.1, 17.2. HRMS (ESI)  $m/z$  calcd for  $\text{C}_{29}\text{H}_{30}\text{N}_3\text{O}$   $[\text{M}+\text{H}]^+ = 436.2383$ , found = 436.2389; the ee value was 96%,  $t_R$  (minor) = 12.5 min,  $t_R$  (major) = 16.5 min (Chiralpak IC,  $\lambda = 254$  nm, 10% *i*-PrOH/Hexane, flow rate = 1.0 mL/min).

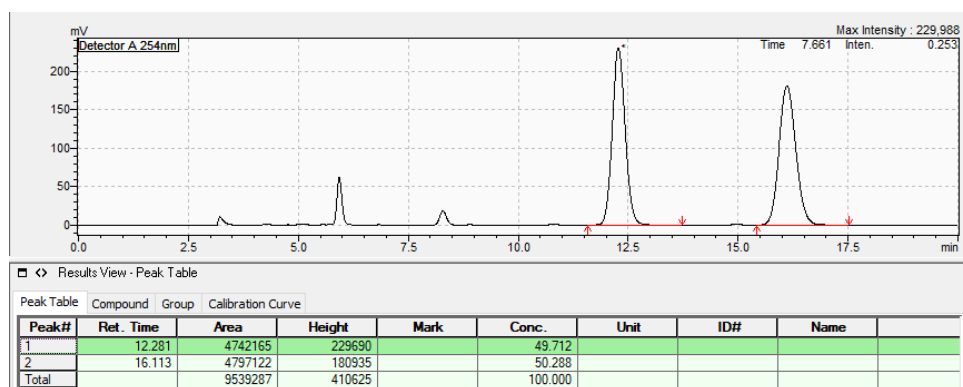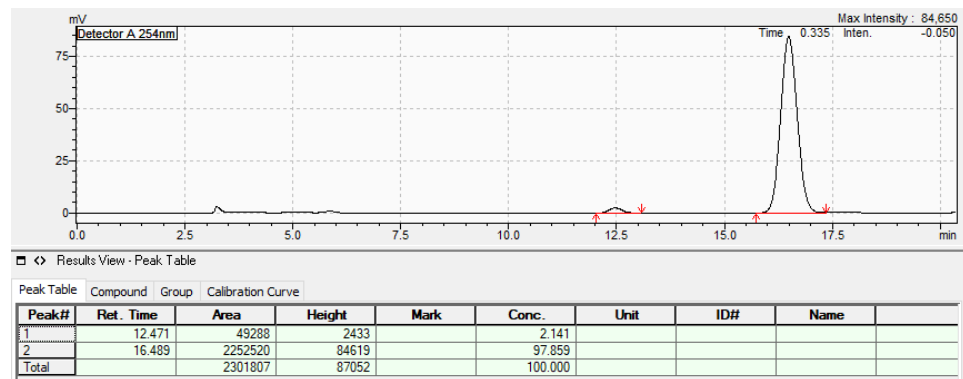

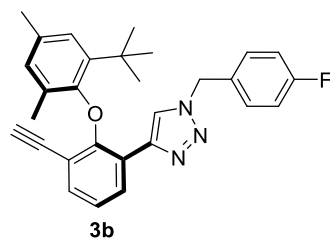

**4-(2-(2-(*tert*-Butyl)-4,6-dimethylphenoxy)-3-ethynylphenyl)-1-(4-fluorobenzyl)-1H-1,2,3-triazole (3b)**

74% yield;  $[\alpha]_D^{25} = -42.2$  (c 0.5,  $\text{CHCl}_3$ ), a white foam,  $R_f = 0.35$  (hexane/ethyl acetate 7:1).  $^1\text{H}$  NMR (400 MHz,  $\text{CDCl}_3$ )  $\delta$  8.41 (d,  $J = 7.1$  Hz, 1H), 7.96 (s, 1H), 7.25 (d,  $J = 8.4$  Hz, 1H), 7.17 – 7.11 (m, 2H), 7.06 – 6.87 (m, 4H), 6.69 (s, 1H), 5.56 (d,  $J = 15.0$  Hz, 1H), 5.32 (d,  $J = 15.0$  Hz, 1H), 2.58 (s, 1H), 2.24 (s, 3H), 1.73 (s, 3H), 1.19 (s, 9H).  $^{13}\text{C}$  NMR (101 MHz,  $\text{CDCl}_3$ )  $\delta$  150.9, 141.9, 135.9, 134.0, 130.4, 129.8, 129.7, 129.2, 129.1, 125.4, 122.0, 121.5, 116.1, 115.9, 110.5, 82.9, 78.4, 53.4, 34.9, 31.0, 21.1, 17.2. HRMS (ESI)  $m/z$  calcd for  $\text{C}_{29}\text{H}_{29}\text{FN}_3\text{O}$   $[\text{M}+\text{H}]^+ = 454.2289$ , found = 454.2294; the ee value was 90%,  $t_R$  (minor) = 10.8 min,  $t_R$  (major) = 14.6 min (Chiralpak IC,  $\lambda = 254$  nm, 10% *i*-PrOH/Hexane, flow rate = 1.0 mL/min).

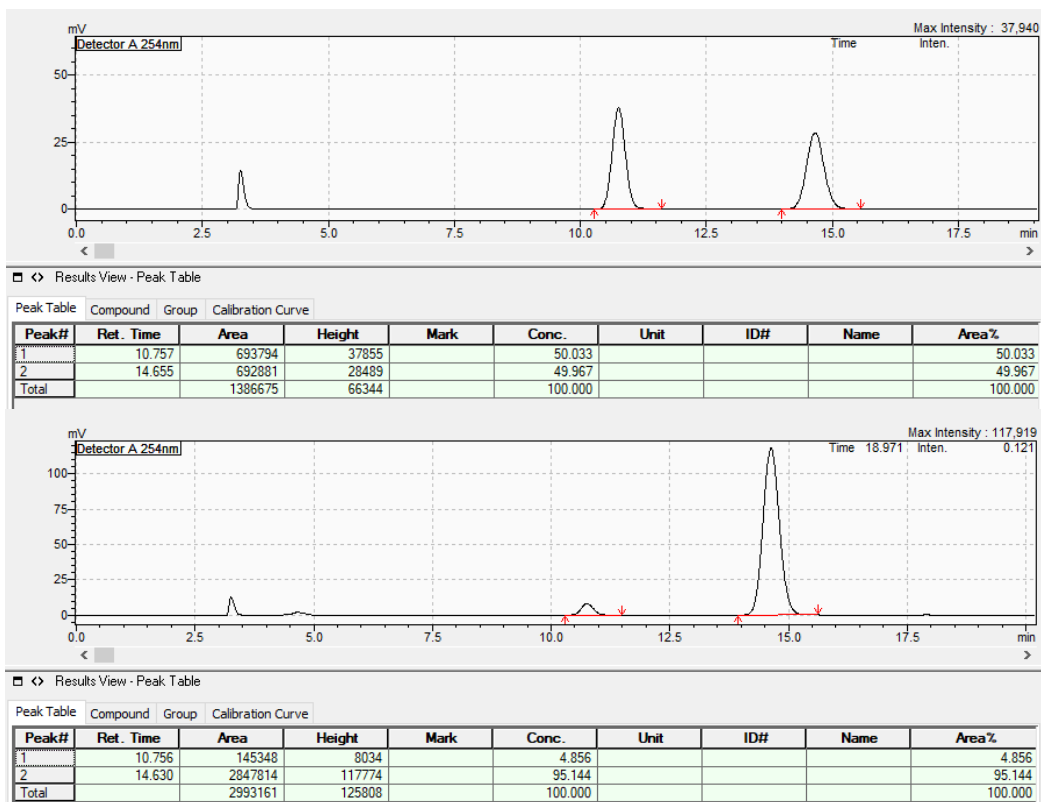

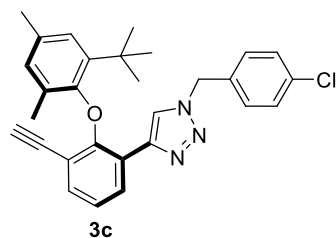

**4-(2-(2-(*tert*-Butyl)-4,6-dimethylphenoxy)-3-ethynylphenyl)-1-(4-chlorobenzyl)-1H-1,2,3-triazole (3c)**

77% yield;  $[\alpha]_D^{25} = -53.8$  (c 0.5,  $\text{CHCl}_3$ ), a white foam,  $R_f = 0.33$  (hexane/ethyl acetate 8:1).  $^1\text{H}$  NMR (400 MHz,  $\text{CDCl}_3$ )  $\delta$  8.41 (d,  $J = 7.6$  Hz, 1H), 7.96 (s, 1H), 7.31 – 7.18 (m, 3H), 7.09 (d,  $J = 8.5$  Hz, 2H), 7.00 (t,  $J = 7.7$  Hz, 1H), 6.91 (s, 1H), 6.69 (s, 1H), 5.55 (d,  $J = 15.1$  Hz, 1H), 5.32 (d,  $J = 15.1$  Hz, 1H), 2.58 (s, 1H), 2.24 (s, 3H), 1.73 (s, 3H), 1.19 (s, 9H).  $^{13}\text{C}$  NMR (101 MHz,  $\text{CDCl}_3$ )  $\delta$  154.1, 150.9, 141.9, 135.9, 134.7, 134.0, 133.3, 130.4, 129.2, 129.2, 129.2, 129.1, 125.4, 122.0, 121.4, 82.9, 78.4, 53.4, 34.9, 31.0, 21.1, 17.3. HRMS (ESI)  $m/z$  calcd for  $\text{C}_{29}\text{H}_{29}\text{ClN}_3\text{O}$   $[\text{M}+\text{H}]^+ = 470.1994$ , found = 470.1998; the ee value was 95%,  $t_R$  (minor) = 11.3 min,  $t_R$  (major) = 15.1 min (Chiralpak IC,  $\lambda = 254$  nm, 10% *i*-PrOH/Hexane, flow rate = 1.0 mL/min).

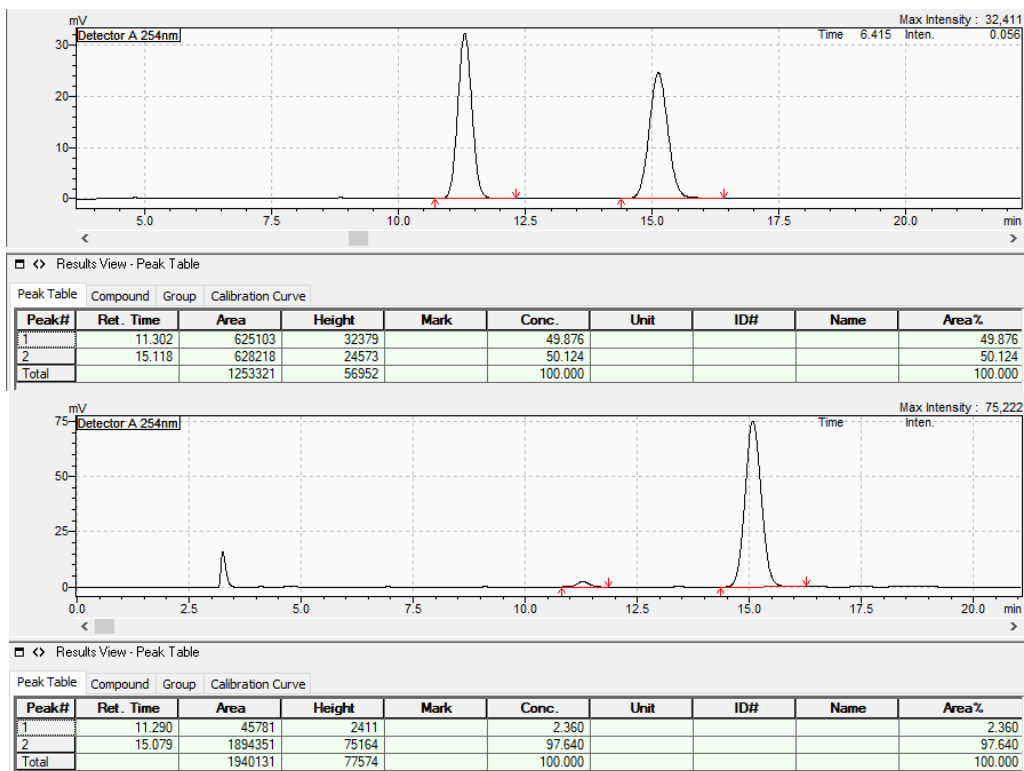

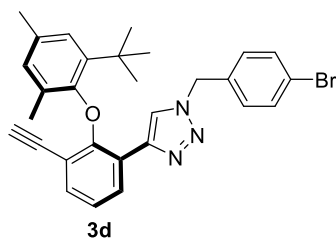

**1-(4-Bromobenzyl)-4-(2-(2-(*tert*-butyl)-4,6-dimethylphenoxy)-3-ethynylphenyl)-1H-1,2,3-triazole (3d)**

75% yield;  $[\alpha]_D^{25} = -66.9$  (c 0.5,  $\text{CHCl}_3$ ), a white foam,  $R_f = 0.30$  (hexane/ethyl acetate 8:1).  $^1\text{H}$  NMR (400 MHz,  $\text{CDCl}_3$ )  $\delta$  8.41 (d,  $J = 9.6$  Hz, 1H), 7.96 (s, 1H), 7.37 (d,  $J = 8.5$  Hz, 2H), 7.26 (dd,  $J = 7.7, 1.8$  Hz, 1H), 7.07 – 6.97 (m, 3H), 6.91 (s, 1H), 6.69 (s, 1H), 5.53 (d,  $J = 15.1$  Hz, 1H), 5.31 (d,  $J = 15.1$  Hz, 1H), 2.88 (s, 1H), 2.24 (s, 3H), 1.73 (s, 3H), 1.19 (s, 9H).  $^{13}\text{C}$  NMR (101 MHz,  $\text{CDCl}_3$ )  $\delta$  154.1, 150.9, 143.5, 141.9, 136.0, 134.0, 133.8, 132.2, 130.4, 129.5, 129.2, 129.16, 125.4, 123.2, 122.8, 122.0, 121.3, 110.5, 82.9, 78.4, 53.5, 34.9, 31.0, 21.1, 17.3. HRMS (ESI)  $m/z$  calcd for  $\text{C}_{29}\text{H}_{29}\text{BrN}_3\text{O}$   $[\text{M}+\text{H}]^+ = 514.1489$ , found = 514.1494; the ee value was 95%,  $t_R$  (minor) = 12.0 min,  $t_R$  (major) = 15.8 min (Chiralpak IC,  $\lambda = 254$  nm, 10% *i*-PrOH/Hexane, flow rate = 1.0 mL/min).

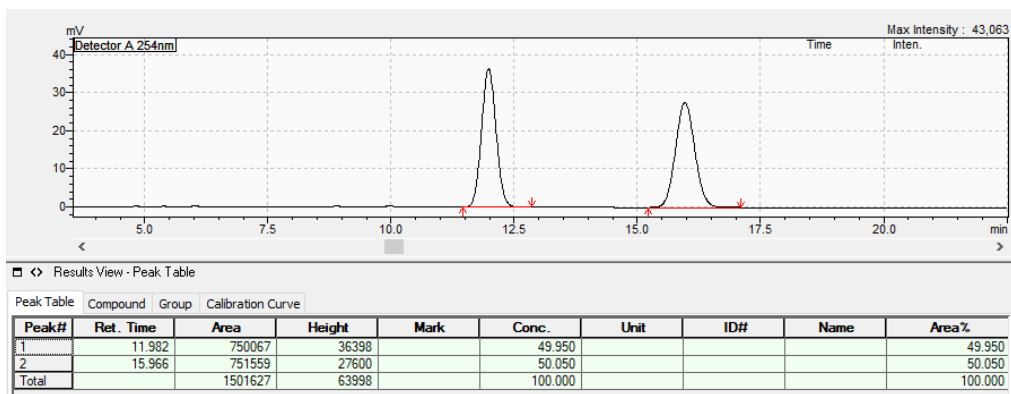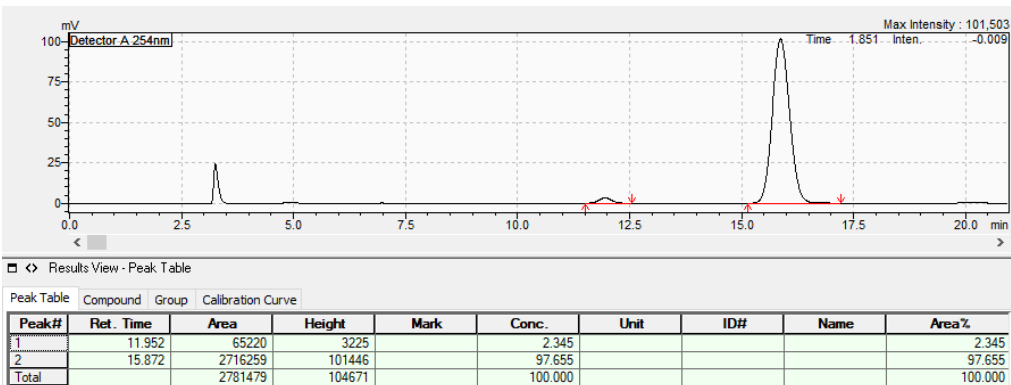



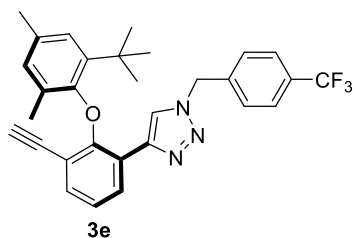

**4-(2-(2-(*tert*-Butyl)-4,6-dimethylphenoxy)-3-ethynylphenyl)-1-(4-(trifluoromethyl)benzyl)-1H-1,2,3-triazole (3e)**

79% yield;  $[\alpha]_D^{25} = -70.8$  (c 0.5,  $\text{CHCl}_3$ ), a white foam,  $R_f = 0.35$  (hexane/ethyl acetate 8:1).  $^1\text{H}$  NMR (400 MHz,  $\text{CDCl}_3$ )  $\delta$  8.41 (dd,  $J = 7.8, 1.8$  Hz, 1H), 7.97 (s, 1H), 7.51 (d,  $J = 8.1$  Hz, 2H), 7.26 (d,  $J = 7.7$  Hz, 3H), 7.00 (t,  $J = 7.7$  Hz, 1H), 6.90 (s, 1H), 6.70 (s, 1H), 5.66 (d,  $J = 15.3$  Hz, 1H), 5.41 (d,  $J = 15.3$  Hz, 1H), 2.58 (s, 1H), 2.24 (s, 3H), 1.73 (s, 3H), 1.17 (s, 9H).  $^{13}\text{C}$  NMR (101 MHz,  $\text{CDCl}_3$ )  $\delta$  154.1, 150.9, 141.9, 138.8, 136.0, 134.1, 130.4, 129.2, 129.1, 128.0, 126.1, 126.0, 125.4, 123.3, 122.0, 121.3, 110.5, 82.9, 78.4, 53.5, 34.9, 30.9, 21.1, 17.2. HRMS (ESI)  $m/z$  calcd for  $\text{C}_{30}\text{H}_{29}\text{F}_3\text{N}_3\text{O}$   $[\text{M}+\text{H}]^+ = 504.2257$ , found = 504.2259; the ee value was 87%,  $t_R$  (minor) = 8.7 min,  $t_R$  (major) = 11.3 min (Chiralpak IC,  $\lambda = 254$  nm, 10% *i*-PrOH/Hexane, flow rate = 1.0 mL/min).

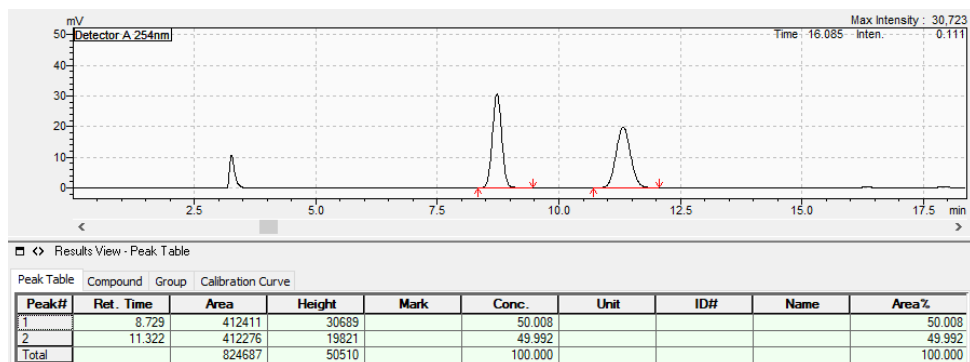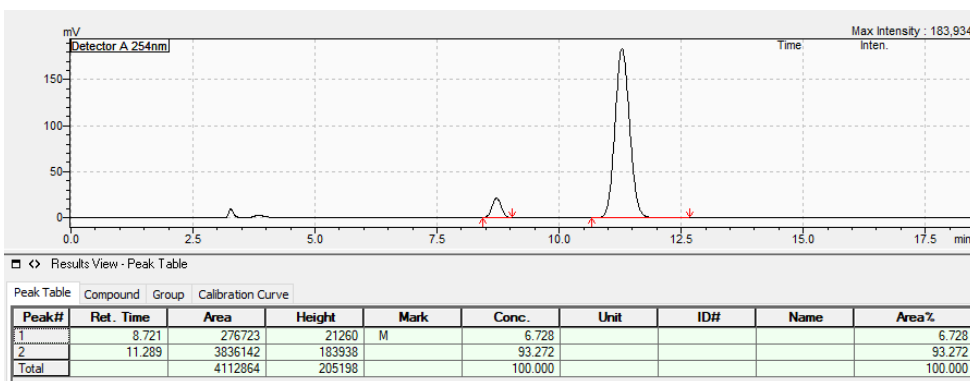

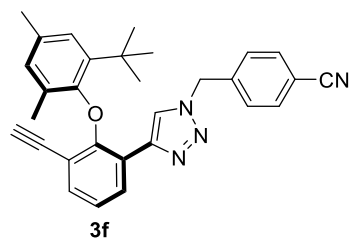

**4-((4-(2-(2-(*tert*-Butyl)-4,6-dimethylphenoxy)-3-ethynylphenyl)-1H-1,2,3-triazol-1-yl)methyl)benzonitrile (3f)**

84% yield;  $[\alpha]_D^{25} = -32.0$  (c 0.5,  $\text{CHCl}_3$ ), a white foam,  $R_f = 0.30$  (hexane/ethyl acetate 4:1).  $^1\text{H}$  NMR (400 MHz,  $\text{CDCl}_3$ )  $\delta$  8.41 (dd,  $J = 7.8, 1.8$  Hz, 1H), 7.99 (s, 1H), 7.55 (d,  $J = 8.4$  Hz, 2H), 7.32 – 7.21 (m, 3H), 7.01 (t,  $J = 7.7$  Hz, 1H), 6.91 (d,  $J = 2.2$  Hz, 1H), 6.70 (dd,  $J = 1.4, 0.7$  Hz, 1H), 5.65 (d,  $J = 15.6$  Hz, 1H), 5.43 (d,  $J = 15.6$  Hz, 1H), 2.59 (s, 1H), 2.24 (s, 3H), 1.74 (s, 3H), 1.19 (s, 9H).  $^{13}\text{C}$  NMR (101 MHz,  $\text{CDCl}_3$ )  $\delta$  154.1, 150.8, 143.8, 141.9, 140.0, 136.1, 134.1, 132.8, 130.4, 129.3, 129.1, 128.2, 125.4, 123.3, 122.0, 121.1, 118.2, 112.7, 110.5, 83.0, 78.3, 53.4, 35.0, 31.0, 21.1, 17.2. HRMS (ESI)  $m/z$  calcd for  $\text{C}_{30}\text{H}_{29}\text{N}_4\text{O}$   $[\text{M}+\text{H}]^+ = 461.2336$ , found = 461.2338; the ee value was 90%,  $t_R$  (minor) = 10.6 min,  $t_R$  (major) = 12.4 min (Chiralpak IC,  $\lambda = 254$  nm, 30% *i*-PrOH/Hexane, flow rate = 1.0 mL/min).

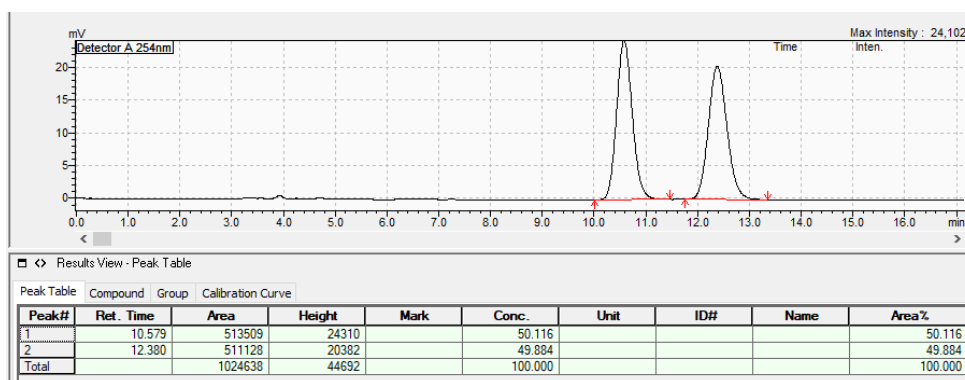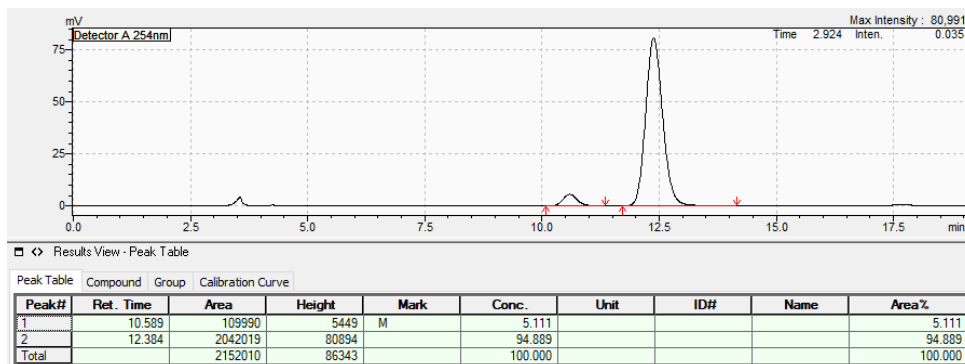

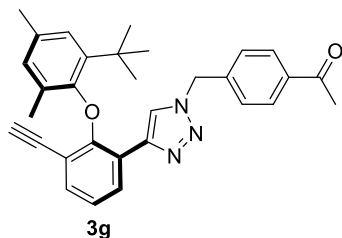

**1-(4-((4-(2-(2-(*tert*-Butyl)-4,6-dimethylphenoxy)-3-ethynylphenyl)-1*H*-1,2,3-triazol-1-yl)methyl)phenyl)ethan-1-one (3g)**

81% yield;  $[\alpha]_D^{25} = -89.0$  (c 0.5,  $\text{CHCl}_3$ ), a white foam,  $R_f = 0.32$  (hexane/ethyl acetate 5:1).  $^1\text{H}$  NMR (400 MHz,  $\text{CDCl}_3$ )  $\delta$  8.42 (dd,  $J = 7.8, 1.8$  Hz, 1H), 7.99 (s, 1H), 7.83 (d,  $J = 8.4$  Hz, 2H), 7.29 – 7.21 (m, 3H), 7.00 (t,  $J = 7.7$  Hz, 1H), 6.90 (s, 1H), 6.69 (s, 1H), 5.64 (d,  $J = 15.4$  Hz, 1H), 5.43 (d,  $J = 15.4$  Hz, 1H), 2.58 (s, 1H), 2.50 (s, 3H), 2.24 (s, 3H), 1.73 (s, 3H), 1.18 (s, 9H).  $^{13}\text{C}$  NMR (101 MHz,  $\text{CDCl}_3$ )  $\delta$  197.4, 154.1, 143.7, 141.9, 139.8, 137.2, 136.0, 134.1, 130.4, 129.2, 129.1, 129.0, 127.8, 125.4, 123.4, 122.0, 121.3, 110.5, 82.9, 78.4, 53.6, 34.9, 31.0, 26.7, 21.1, 17.2. HRMS (ESI)  $m/z$  calcd for  $\text{C}_{31}\text{H}_{32}\text{N}_3\text{O}_2$   $[\text{M}+\text{H}]^+ = 478.2489$ , found = 478.2500; the ee value was 96%,  $t_R$  (minor) = 15.1 min,  $t_R$  (major) = 16.8 min (Chiralpak IC,  $\lambda = 254$  nm, 30% *i*-PrOH/Hexane, flow rate = 1.0 mL/min).

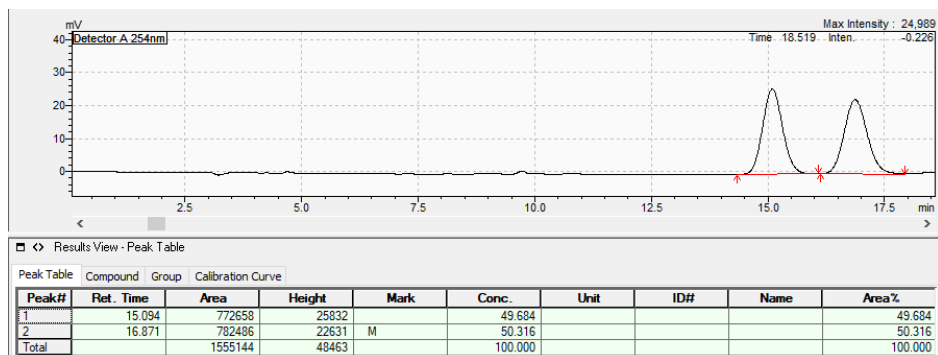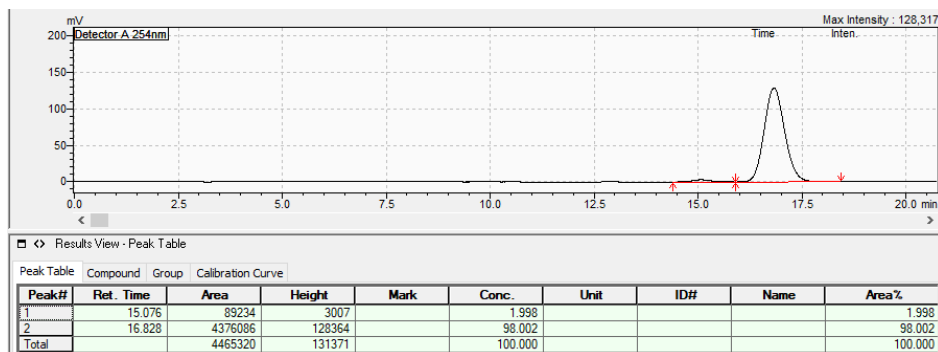

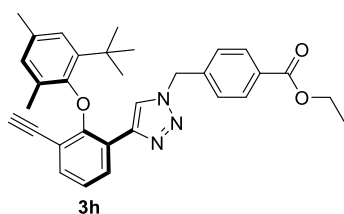

**Ethyl 4-((4-(2-(2-(tert-butyl)-4,6-dimethylphenoxy)-3-ethynylphenyl)-1H-1,2,3-triazol-1-yl)methyl)benzoate (3h)**

70% yield;  $[\alpha]_D^{25} = -59.2$  (c 0.5,  $\text{CHCl}_3$ ), a white foam,  $R_f = 0.34$  (hexane/ethyl acetate 5:1).  $^1\text{H}$  NMR (400 MHz,  $\text{CDCl}_3$ )  $\delta$  8.42 (dd,  $J = 7.8, 1.8$  Hz, 1H), 7.99 (s, 1H), 7.92 (d,  $J = 8.4$  Hz, 2H), 7.26 (dd,  $J = 7.7, 1.8$  Hz, 1H), 7.21 (s, 1H), 7.00 (t,  $J = 7.7$  Hz, 1H), 6.90 (s, 1H), 6.69 (s, 1H), 5.63 (d,  $J = 15.4$  Hz, 1H), 5.42 (d,  $J = 15.4$  Hz, 1H), 4.30 (q,  $J = 7.1$  Hz, 2H), 2.58 (s, 1H), 2.24 (s, 3H), 1.73 (s, 3H), 1.31 (t,  $J = 7.1$  Hz, 3H), 1.19 (s, 9H).  $^{13}\text{C}$  NMR (101 MHz,  $\text{CDCl}_3$ )  $\delta$  166.0, 154.1, 150.9, 141.9, 139.6, 136.0, 134.0, 130.8, 130.4, 130.3, 129.2, 129.1, 127.5, 125.4, 123.4, 122.0, 121.4, 110.5, 82.9, 78.4, 61.2, 53.7, 34.9, 31.0, 21.1, 17.2, 14.3. HRMS (ESI)  $m/z$  calcd for  $\text{C}_{32}\text{H}_{34}\text{N}_3\text{O}_3$   $[\text{M}+\text{H}]^+ = 508.2595$ , found = 508.2608; the ee value was 94%,  $t_R$  (minor) = 26.7 min,  $t_R$  (major) = 34.7 min (Chiralpak IC,  $\lambda = 254$  nm, 10% *i*-PrOH/Hexane, flow rate = 1.0 mL/min).

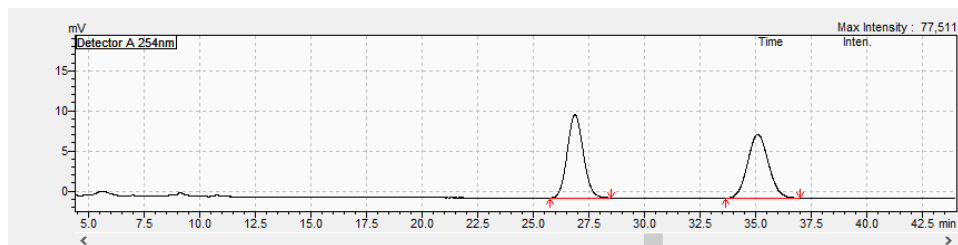

Results View - Peak Table

| Peak# | Ret. Time | Area    | Height | Mark | Conc.   | Unit | ID# | Name |
|-------|-----------|---------|--------|------|---------|------|-----|------|
| 1     | 26.856    | 518320  | 10376  |      | 49.984  |      |     |      |
| 2     | 35.073    | 518648  | 7960   |      | 50.016  |      |     |      |
| Total |           | 1036968 | 18335  |      | 100.000 |      |     |      |

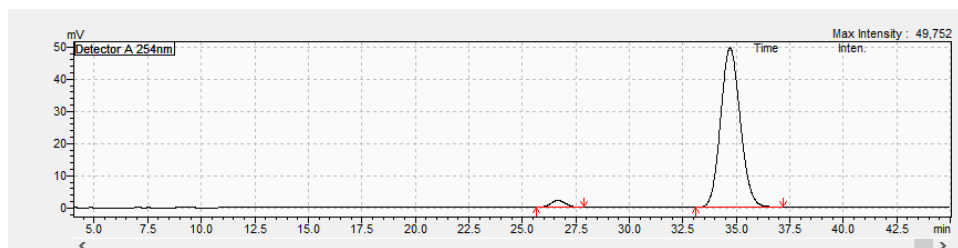

Results View - Peak Table

| Peak# | Ret. Time | Area    | Height | Mark | Conc.   | Unit | ID# | Name |
|-------|-----------|---------|--------|------|---------|------|-----|------|
| 1     | 26.675    | 103293  | 2114   |      | 3.159   |      |     |      |
| 2     | 34.707    | 3166879 | 49538  |      | 96.841  |      |     |      |
| Total |           | 3270171 | 51652  |      | 100.000 |      |     |      |

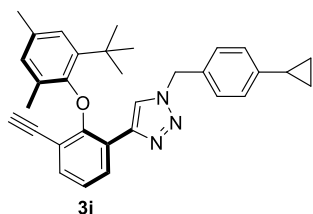

3i

#### 4-(2-(2-(*tert*-Butyl)-4,6-dimethylphenoxy)-3-ethynylphenyl)-1-(4-cyclopropylbenzyl)-1H-1,2,3-triazole (3i)

76% yield;  $[\alpha]_D^{25} = -71.2$  (c 0.5,  $\text{CHCl}_3$ ), a white foam,  $R_f = 0.32$  (hexane/ethyl acetate 8:1).  $^1\text{H}$  NMR (400 MHz,  $\text{CDCl}_3$ )  $\delta$  8.40 (dd,  $J = 7.8, 1.8$  Hz, 1H), 7.93 (s, 1H), 7.24 (dd,  $J = 7.7, 1.8$  Hz, 1H), 7.05 (d,  $J = 8.2$  Hz, 2H), 6.98 (t,  $J = 7.7$  Hz, 1H), 6.95 – 6.86 (m, 3H), 6.73 – 6.58 (m, 1H), 5.52 (d,  $J = 14.8$  Hz, 1H), 5.29 (d,  $J = 14.8$  Hz, 1H), 2.57 (s, 1H), 2.24 (s, 3H), 1.78 (tt,  $J = 8.4, 5.1$  Hz, 1H), 1.72 (s, 3H), 1.18 (s, 9H), 0.91 – 0.83 (m, 2H), 0.62 – 0.52 (m, 2H).  $^{13}\text{C}$  NMR (101 MHz,  $\text{CDCl}_3$ )  $\delta$  154.1, 151.0, 144.7, 141.93, 135.8, 133.9, 131.7, 130.4, 129.2, 129.1, 127.9, 126.29, 125.3, 123.2, 121.9, 121.6, 110.4, 82.8, 78.5, 54.0, 34.9, 31.0, 21.1, 17.2, 15.1, 9.3. HRMS (ESI)  $m/z$  calcd for  $\text{C}_{32}\text{H}_{34}\text{N}_3\text{O}$   $[\text{M}+\text{H}]^+ = 476.2696$ , found = 476.2705; the ee value was 97%,  $t_R$  (minor) = 15.3 min,  $t_R$  (major) = 20.3 min (Chiralpak IC,  $\lambda = 254$  nm, 10% *i*-PrOH/Hexane, flow rate = 1.0 mL/min).

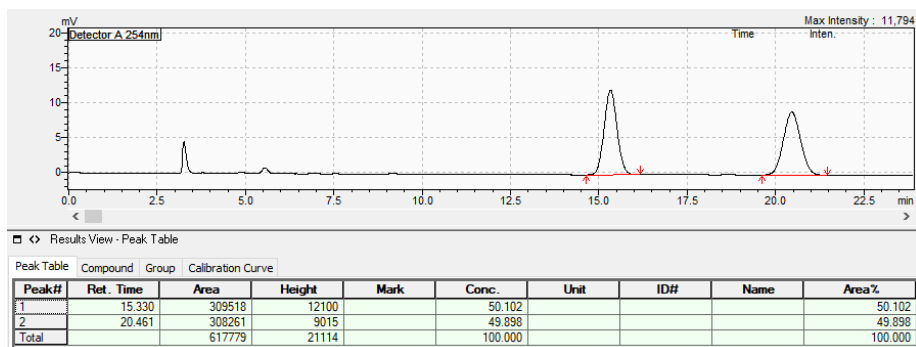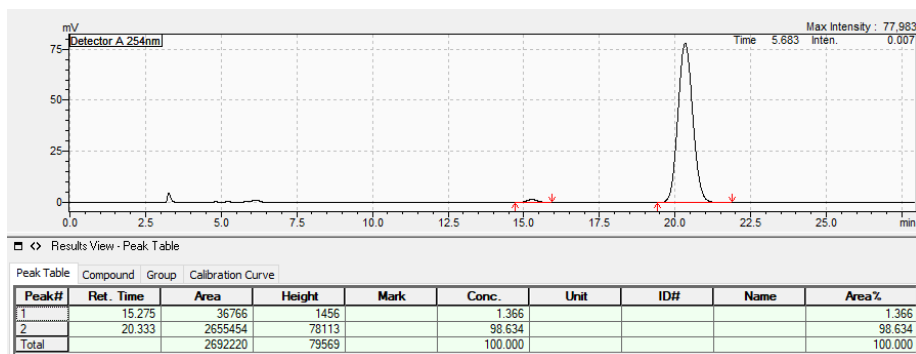

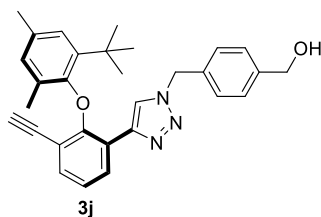

**(4-((4-(2-(2-(*tert*-Butyl)-4,6-dimethylphenoxy)-3-ethynylphenyl)-1*H*-1,2,3-triazol-1-yl)methyl)phenyl)methanol (3j)**

77% yield;  $[\alpha]_D^{25} = -53.0$  (c 0.5,  $\text{CHCl}_3$ ), a white foam,  $R_f = 0.28$  (hexane/ethyl acetate 2:1).  $^1\text{H}$  NMR (400 MHz,  $\text{CDCl}_3$ )  $\delta$  8.40 (d,  $J = 7.8$  Hz, 1H), 7.97 (s, 1H), 7.24 (d,  $J = 7.9$  Hz, 2H), 7.15 (d,  $J = 7.7$  Hz, 2H), 6.99 (t,  $J = 7.7$  Hz, 1H), 6.90 (s, 1H), 6.69 (s, 1H), 5.56 (d,  $J = 14.9$  Hz, 1H), 5.36 (d,  $J = 14.9$  Hz, 1H), 4.60 (s, 2H), 2.58 (s, 1H), 2.24 (s, 3H), 1.72 (s, 3H), 1.19 (s, 9H).  $^{13}\text{C}$  NMR (101 MHz,  $\text{CDCl}_3$ )  $\delta$  154.1, 151.0, 141.9, 141.4, 135.9, 134.1, 134.0, 130.5, 129.2, 129.1, 128.0, 127.5, 125.3, 122.0, 121.5, 110.5, 82.9, 64.8, 53.9, 34.9, 31.0, 21.1, 17.2. HRMS (ESI)  $m/z$  calcd for  $\text{C}_{30}\text{H}_{32}\text{N}_3\text{O}_2$   $[\text{M}+\text{H}]^+ = 466.2489$ , found = 466.2495; the ee value was 92%,  $t_R$  (minor) = 8.2 min,  $t_R$  (major) = 8.7 min (Chiralpak IC,  $\lambda = 254$  nm, 30% *i*-PrOH/Hexane, flow rate = 1.0 mL/min).

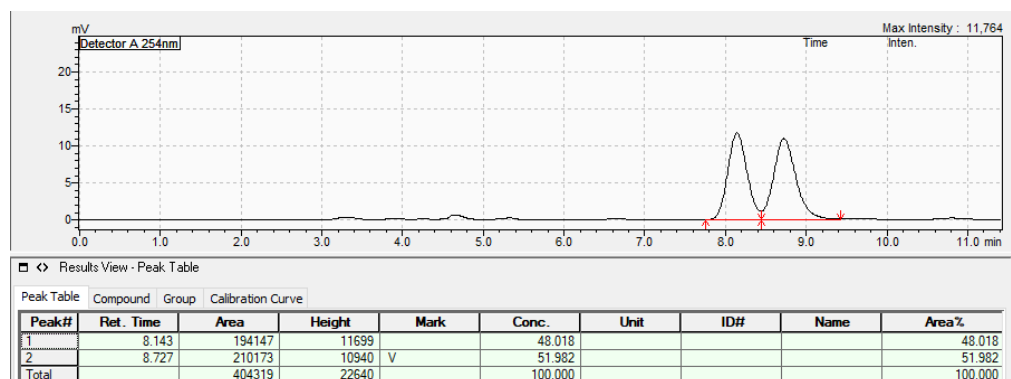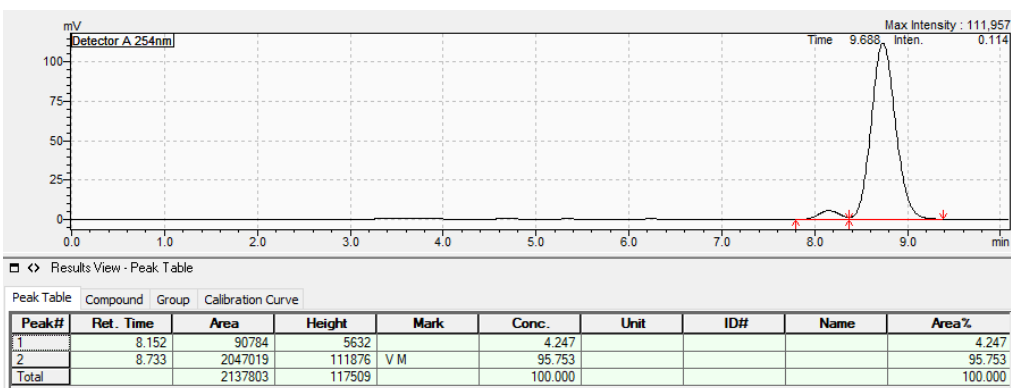

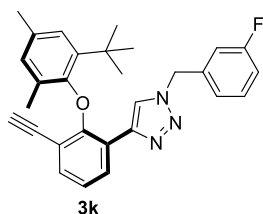

3k

**4-(2-(2-(*tert*-Butyl)-4,6-dimethylphenoxy)-3-ethynylphenyl)-1-(3-fluorobenzyl)-1H-1,2,3-triazole (3k)**

79% yield;  $[\alpha]_D^{25} = -57.0$  (c 0.5,  $\text{CHCl}_3$ ), a white foam,  $R_f = 0.29$  (hexane/ethyl acetate 8:1).  $^1\text{H}$  NMR (400 MHz,  $\text{CDCl}_3$ )  $\delta$  8.41 (d,  $J = 7.9$  Hz, 1H), 7.98 (s, 1H), 7.30 – 7.20 (m, 2H), 7.06 – 6.81 (m, 5H), 6.69 (s, 1H), 5.59 (d,  $J = 15.2$  Hz, 1H), 5.34 (d,  $J = 15.2$  Hz, 1H), 2.58 (s, 1H), 2.24 (s, 3H), 1.74 (s, 3H), 1.19 (s, 9H).  $^{13}\text{C}$  NMR (101 MHz,  $\text{CDCl}_3$ )  $\delta$  150.9, 143.6, 141.9, 135.9, 134.0, 130.7, 130.7, 130.4, 129.2, 129.1, 125.4, 123.3, 123.3, 122.0, 121.4, 115.7, 115.5, 114.9, 114.7, 110.5, 82.9, 78.4, 53.5, 53.5, 34.9, 31.0, 21.1, 17.2. HRMS (ESI)  $m/z$  calcd for  $\text{C}_{29}\text{H}_{29}\text{FN}_3\text{O}$   $[\text{M}+\text{H}]^+ = 454.2289$ , found = 454.2291; the ee value was 85%,  $t_R$  (minor) = 10.9 min,  $t_R$  (major) = 15.0 min (Chiralpak IC,  $\lambda = 254$  nm, 10% *i*-PrOH/Hexane, flow rate = 1.0 mL/min).

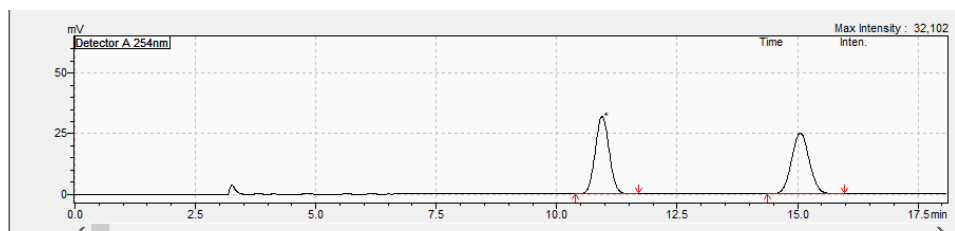

Results View - Peak Table

| Peak# | Ret. Time | Area    | Height | Mark | Conc.   | Unit | ID# | Name | Area%   |
|-------|-----------|---------|--------|------|---------|------|-----|------|---------|
| 1     | 10.943    | 647443  | 31998  |      | 50.058  |      |     |      | 50.058  |
| 2     | 15.056    | 645934  | 25183  |      | 49.942  |      |     |      | 49.942  |
| Total |           | 1293377 | 57181  |      | 100.000 |      |     |      | 100.000 |

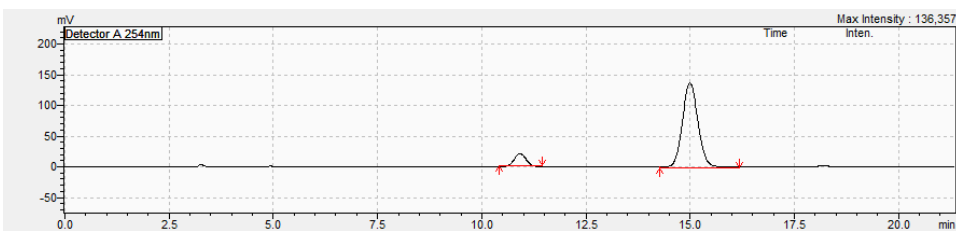

Results View - Peak Table

| Peak# | Ret. Time | Area    | Height | Mark | Conc.   | Unit | ID# | Name | Area%   |
|-------|-----------|---------|--------|------|---------|------|-----|------|---------|
| 1     | 10.919    | 287674  | 18968  | M    | 7.338   |      |     |      | 7.338   |
| 2     | 14.995    | 3632649 | 137493 | M    | 92.662  |      |     |      | 92.662  |
| Total |           | 3920323 | 156461 |      | 100.000 |      |     |      | 100.000 |

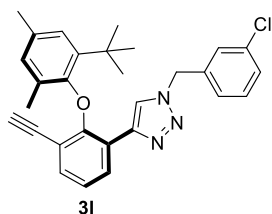

**4-(2-(2-(*tert*-Butyl)-4,6-dimethylphenoxy)-3-ethynylphenyl)-1-(3-chlorobenzyl)-1*H*-1,2,3-triazole (3I)**

79% yield;  $[\alpha]_D^{25} = -76.0$  (c 0.5,  $\text{CHCl}_3$ ), a white foam,  $R_f = 0.35$  (hexane/ethyl acetate 7:1).  $^1\text{H}$  NMR (400 MHz,  $\text{CDCl}_3$ )  $\delta$  8.42 (dd,  $J = 7.8, 1.8$  Hz, 1H), 7.98 (s, 1H), 7.29 – 7.14 (m, 4H), 7.07 – 6.97 (m, 2H), 6.91 (s, 1H), 6.69 (s, 1H), 5.56 (d,  $J = 15.2$  Hz, 1H), 5.32 (d,  $J = 15.2$  Hz, 1H), 2.58 (s, 1H), 2.24 (s, 3H), 1.74 (s, 3H), 1.20 (s, 9H).  $^{13}\text{C}$  NMR (101 MHz,  $\text{CDCl}_3$ )  $\delta$  154.1, 150.9, 143.6, 141.9, 136.8, 136.0, 1345.0, 134.0, 130.4, 130.3, 129.2, 129.1, 128.8, 127.9, 125.8, 125.4, 123.3, 122.0, 121.4, 110.5, 82.9, 78.4, 53.4, 35.0, 31.0, 21.1, 17.2. HRMS (ESI)  $m/z$  calcd for  $\text{C}_{29}\text{H}_{29}\text{ClN}_3\text{O}$   $[\text{M}+\text{H}]^+ = 470.1994$ , found = 470.1998; the ee value was 91%,  $t_R$  (minor) = 11.5 min,  $t_R$  (major) = 17.5 min (Chiralpak IC,  $\lambda = 254$  nm, 10% *i*-PrOH/Hexane, flow rate = 1.0 mL/min).

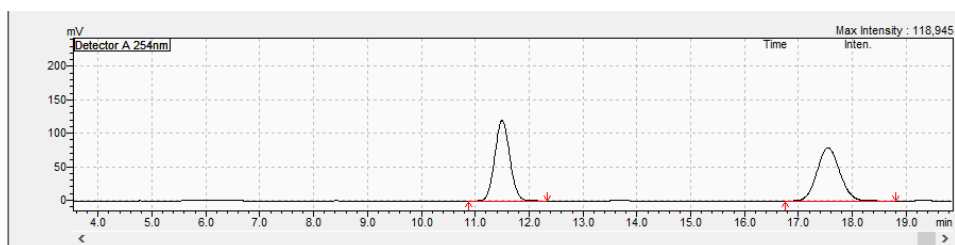

Results View - Peak Table

| Peak# | Ret. Time | Area    | Height | Mark | Conc.   | Unit | ID# | Name | Area%   |
|-------|-----------|---------|--------|------|---------|------|-----|------|---------|
| 1     | 11.498    | 2320651 | 119942 |      | 50.016  |      |     |      | 50.016  |
| 2     | 17.547    | 2319182 | 79385  |      | 49.984  |      |     |      | 49.984  |
| Total |           | 4639832 | 199326 |      | 100.000 |      |     |      | 100.000 |

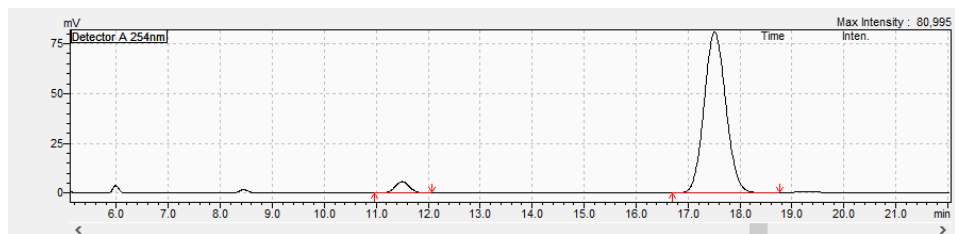

Results View - Peak Table

| Peak# | Ret. Time | Area    | Height | Mark | Conc.   | Unit | ID# | Name | Area%   |
|-------|-----------|---------|--------|------|---------|------|-----|------|---------|
| 1     | 11.498    | 111178  | 5740   |      | 4.506   |      |     |      | 4.506   |
| 2     | 17.512    | 2356243 | 80898  |      | 95.494  |      |     |      | 95.494  |
| Total |           | 2467421 | 86638  |      | 100.000 |      |     |      | 100.000 |



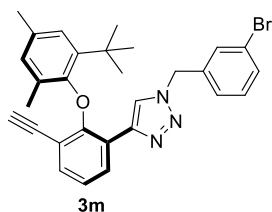

3m

**4-(2-(2-(*tert*-Butyl)-4,6-dimethylphenoxy)-3-ethynylphenyl)-1-(3-bromobenzyl)-1H-1,2,3-triazole (3m)**

73% yield;  $[\alpha]_D^{25} = -48.3$  (c 0.5,  $\text{CHCl}_3$ ), a white foam,  $R_f = 0.32$  (hexane/ethyl acetate 7:1).  $^1\text{H}$  NMR (400 MHz,  $\text{CDCl}_3$ )  $\delta$  8.42 (dd,  $J = 7.8, 1.8$  Hz, 1H), 7.98 (s, 1H), 7.36 (d,  $J = 9.2$  Hz, 1H), 7.33 – 7.30 (m, 1H), 7.26 (dd,  $J = 7.6, 1.8$  Hz, 1H), 7.16 – 7.06 (m, 2H), 7.00 (t,  $J = 7.7$  Hz, 1H), 6.91 (s, 1H), 6.70 (s, 1H), 5.56 (d,  $J = 15.2$  Hz, 1H), 5.31 (d,  $J = 15.2$  Hz, 1H), 2.58 (s, 1H), 2.24 (s, 3H), 1.74 (s, 3H), 1.20 (s, 9H).  $^{13}\text{C}$  NMR (101 MHz,  $\text{CDCl}_3$ )  $\delta$  154.1, 150.9, 143.6, 141.9, 137.0, 135.9, 134.0, 131.8, 130.7, 130.6, 130.4, 129.2, 129.1, 126.3, 125.4, 123.3, 123.06, 122.0, 121.4, 110.5, 82.9, 78.4, 53.4, 35.0, 31.0, 21.1, 17.3. HRMS (ESI)  $m/z$  calcd for  $\text{C}_{29}\text{H}_{29}\text{BrN}_3\text{O}$   $[\text{M}+\text{H}]^+ = 514.1489$ , found = 514.1495; the ee value was 94%,  $t_R$  (minor) = 11.8 min,  $t_R$  (major) = 18.5 min (Chiralpak IC,  $\lambda = 254$  nm, 10% *i*-PrOH/Hexane, flow rate = 1.0 mL/min).

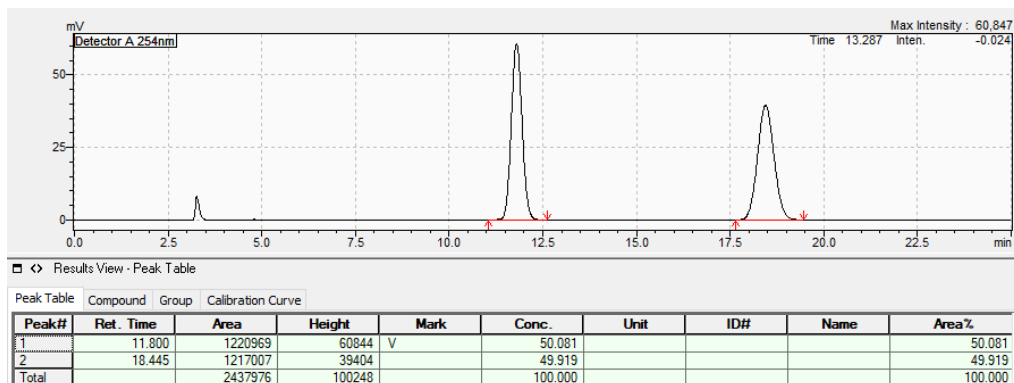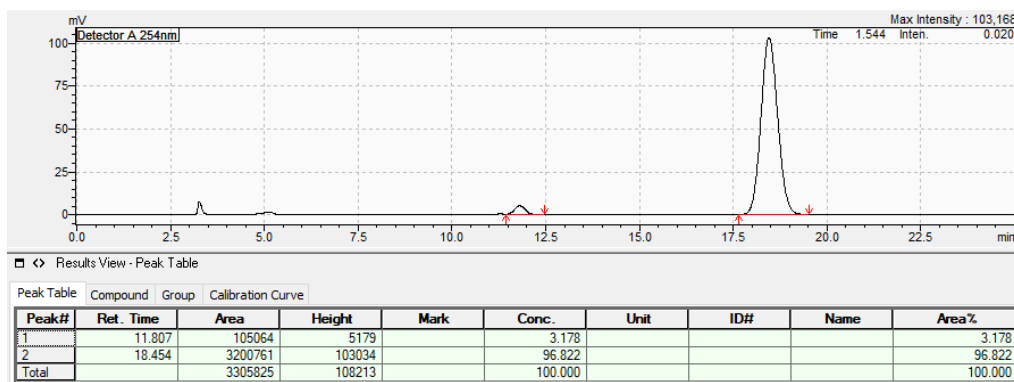

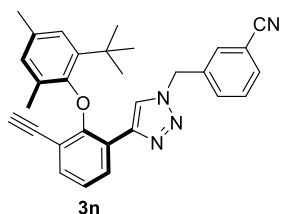

**3-((4-(2-(2-(*tert*-Butyl)-4,6-dimethylphenoxy)-3-ethynylphenyl)-1H-1,2,3-triazol-1-yl)methyl)benzonitrile (3n)**

75% yield;  $[\alpha]_D^{25} = -78.2$  (c 0.5,  $\text{CHCl}_3$ ), a white foam,  $R_f = 0.22$  (hexane/ethyl acetate 4:1).  $^1\text{H}$  NMR (400 MHz,  $\text{CDCl}_3$ )  $\delta$  8.41 (d,  $J = 7.8$  Hz, 1H), 8.00 (d,  $J = 1.5$  Hz, 1H), 7.54 (t,  $J = 4.6$  Hz, 1H), 7.45 (s, 1H), 7.38 (d,  $J = 4.7$  Hz, 2H), 7.27 (d,  $J = 7.7$  Hz, 1H), 7.01 (t,  $J = 7.8$  Hz, 1H), 6.91 (s, 1H), 6.70 (s, 1H), 5.63 (d,  $J = 15.4$  Hz, 1H), 5.40 (d,  $J = 15.4$  Hz, 1H), 2.59 (s, 1H), 2.24 (s, 3H), 1.74 (s, 3H), 1.20 (s, 9H).  $^{13}\text{C}$  NMR (101 MHz,  $\text{CDCl}_3$ )  $\delta$  154.1, 150.8, 143.9, 141.9, 136.5, 136.1, 134.1, 132.3, 132.0, 131.0, 130.4, 130.0, 129.3, 129.1, 125.4, 123.3, 122.0, 121.2, 118.0, 113.4, 110.5, 83.0, 78.3, 53.1, 35.0, 31.0, 21.1, 17.3. HRMS (ESI)  $m/z$  calcd for  $\text{C}_{30}\text{H}_{29}\text{N}_4\text{O}$   $[\text{M}+\text{H}]^+ = 461.2336$ , found = 461.2338; the ee value was 94%,  $t_R$  (minor) = 16.5 min,  $t_R$  (major) = 28.6 min (Chiralpak IC,  $\lambda = 254$  nm, 30% *i*-PrOH/Hexane, flow rate = 1.0 mL/min).

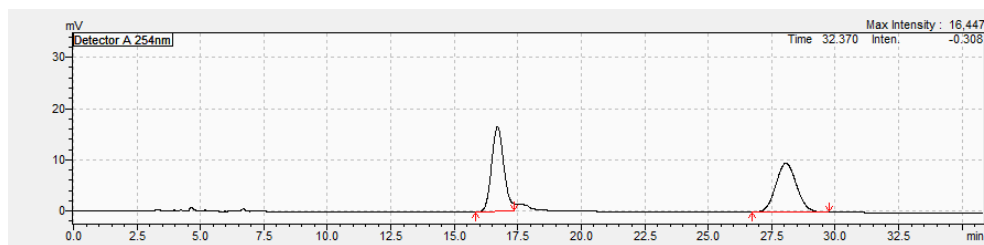

Results View - Peak Table

| Peak# | Ret. Time | Area    | Height | Mark | Conc.   | Unit | ID# | Name | Area%   |
|-------|-----------|---------|--------|------|---------|------|-----|------|---------|
| 1     | 16.701    | 559106  | 16560  | M    | 50.590  |      |     |      | 50.590  |
| 2     | 28.062    | 546062  | 9569   |      | 49.410  |      |     |      | 49.410  |
| Total |           | 1105168 | 26129  |      | 100.000 |      |     |      | 100.000 |

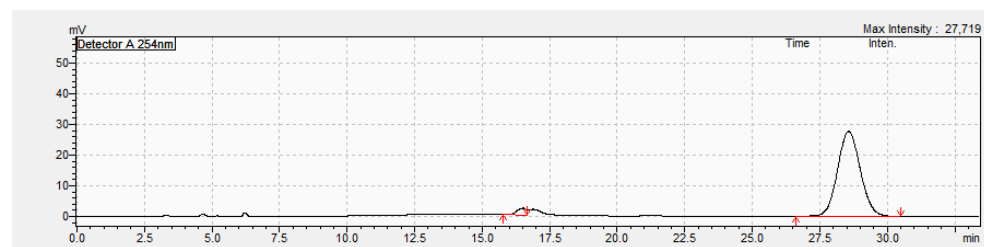

Results View - Peak Table

| Peak# | Ret. Time | Area    | Height | Mark | Conc.   | Unit | ID# | Name | Area%   |
|-------|-----------|---------|--------|------|---------|------|-----|------|---------|
| 1     | 16.530    | 52691   | 2169   |      | 3.140   |      |     |      | 3.140   |
| 2     | 28.865    | 1625370 | 27680  |      | 96.860  |      |     |      | 96.860  |
| Total |           | 1678061 | 29849  |      | 100.000 |      |     |      | 100.000 |

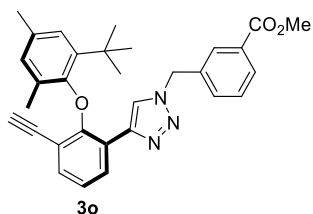

**Methyl 3-((4-(2-(2-(*tert*-butyl)-4,6-dimethylphenoxy)-3-ethynylphenyl)-1H-1,2,3-triazol-1-yl)methyl)benzoate (3o)**

82% yield;  $[\alpha]_D^{25} = -91.6$  (c 0.5,  $\text{CHCl}_3$ ), a white foam,  $R_f = 0.32$  (hexane/ethyl acetate 6:1).  $^1\text{H}$  NMR (400 MHz,  $\text{CDCl}_3$ )  $\delta$  8.42 (d,  $J = 7.3$  Hz, 1H), 7.98 (s, 1H), 7.95 – 7.90 (m, 1H), 7.87 (p,  $J = 1.0$  Hz, 1H), 7.37 – 7.30 (m, 2H), 7.25 (dd,  $J = 7.6, 1.2$  Hz, 1H), 6.99 (t,  $J = 7.6$  Hz, 1H), 6.89 (d,  $J = 2.2$  Hz, 1H), 6.69 (dt,  $J = 2.3, 0.7$  Hz, 1H), 5.63 (d,  $J = 15.0$  Hz, 1H), 5.40 (d,  $J = 15.0$  Hz, 1H), 3.82 (s, 3H), 2.58 (s, 1H), 2.23 (s, 3H), 1.73 (s, 3H), 1.17 (s, 9H).  $^{13}\text{C}$  NMR (101 MHz,  $\text{CDCl}_3$ )  $\delta$  166.4, 154.1, 141.9, 135.9, 135.3, 134.0, 132.2, 131.0, 130.4, 129.9, 129.3, 129.2, 129.1, 128.9, 125.3, 121.9, 121.4, 110.5, 82.9, 78.4, 53.7, 52.3, 34.9, 31.0, 21.1, 17.2. HRMS (ESI)  $m/z$  calcd for  $\text{C}_{31}\text{H}_{32}\text{N}_3\text{O}_3$   $[\text{M}+\text{H}]^+ = 494.2438$ , found = 494.2440; the ee value was 90%,  $t_R$  (minor) = 11.7 min,  $t_R$  (major) = 15.4 min (Chiralpak IC,  $\lambda = 254$  nm, 30% *i*-PrOH/Hexane, flow rate = 1.0 mL/min).

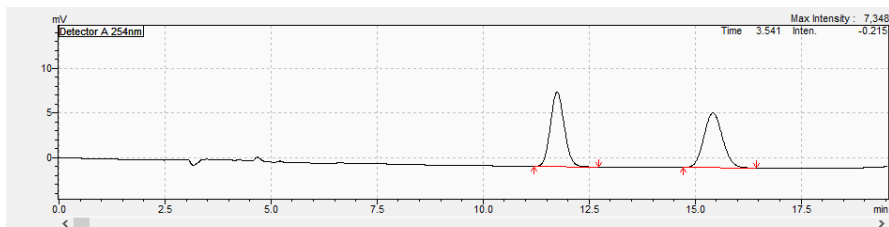

Results View - Peak Table

| Peak# | Ret. Time | Area   | Height | Mark | Conc.   | Unit | ID# | Name | Area%   |
|-------|-----------|--------|--------|------|---------|------|-----|------|---------|
| 1     | 11.746    | 189954 | 8346   |      | 50.202  |      |     |      | 50.202  |
| 2     | 15.420    | 188427 | 6132   |      | 49.798  |      |     |      | 49.798  |
| Total |           | 378381 | 14478  |      | 100.000 |      |     |      | 100.000 |

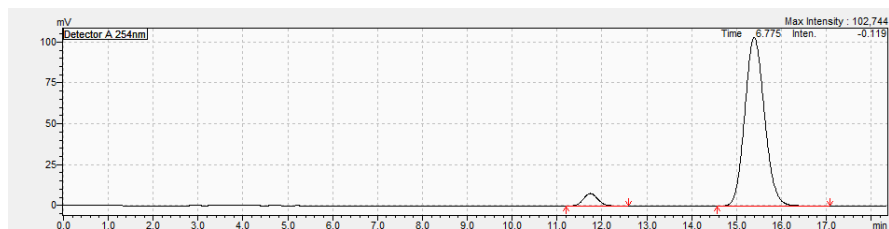

Results View - Peak Table

| Peak# | Ret. Time | Area    | Height | Mark | Conc.   | Unit | ID# | Name | Area%   |
|-------|-----------|---------|--------|------|---------|------|-----|------|---------|
| 1     | 11.742    | 175040  | 7680   |      | 5.247   |      |     |      | 5.247   |
| 2     | 15.395    | 3160860 | 103059 |      | 94.753  |      |     |      | 94.753  |
| Total |           | 3335899 | 110739 |      | 100.000 |      |     |      | 100.000 |

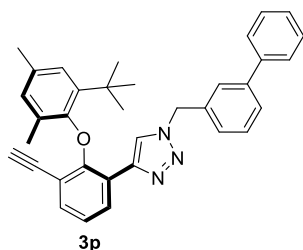

**1-([1,1'-Biphenyl]-3-ylmethyl)-4-(2-(2-(*tert*-butyl)-4,6-dimethylphenoxy)-3-ethynylphenyl)-1H-1,2,3-triazole (3p)**

76% yield;  $[\alpha]_D^{25} = -62.2$  (c 0.5,  $\text{CHCl}_3$ ), a white foam,  $R_f = 0.32$  (hexane/ethyl acetate 8:1).  $^1\text{H}$  NMR (400 MHz,  $\text{CDCl}_3$ )  $\delta$  8.42 (dd,  $J = 7.8, 1.8$  Hz, 1H), 8.02 (s, 1H), 7.49 – 7.23 (m, 9H), 7.13 (dt,  $J = 7.8, 1.3$  Hz, 1H), 6.88 (d,  $J = 2.2$  Hz, 1H), 6.71 – 6.64 (m, 1H), 5.64 (d,  $J = 15.0$  Hz, 1H), 5.41 (d,  $J = 15.0$  Hz, 1H), 2.57 (s, 1H), 2.23 (s, 3H), 1.72 (s, 3H), 1.14 (s, 9H).  $^{13}\text{C}$  NMR (101 MHz,  $\text{CDCl}_3$ )  $\delta$  154.1, 151.0, 143.5, 142.2, 141.9, 135.8, 135.4, 133.9, 130.4, 129.5, 129.2, 129.1, 128.8, 127.6, 127.4, 127.2, 126.7, 126.6, 125.3, 123.3, 121.9, 121.6, 110.5, 82.8, 54.2, 34.9, 31.0, 21.1, 17.2. HRMS (ESI)  $m/z$  calcd for  $\text{C}_{35}\text{H}_{34}\text{N}_3\text{O}$   $[\text{M}+\text{H}]^+ = 512.2696$ , found = 512.2704; the ee value was 92%,  $t_R$  (minor) = 14.5 min,  $t_R$  (major) = 18.6 min (Chiralpak IC,  $\lambda = 254$  nm, 10% *i*-PrOH/Hexane, flow rate = 1.0 mL/min).

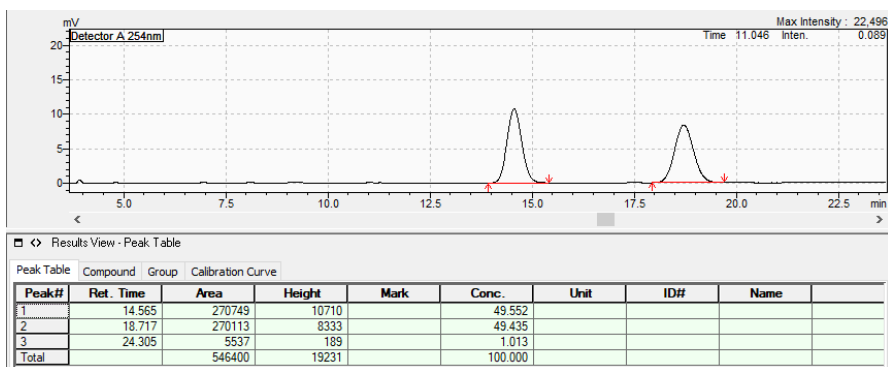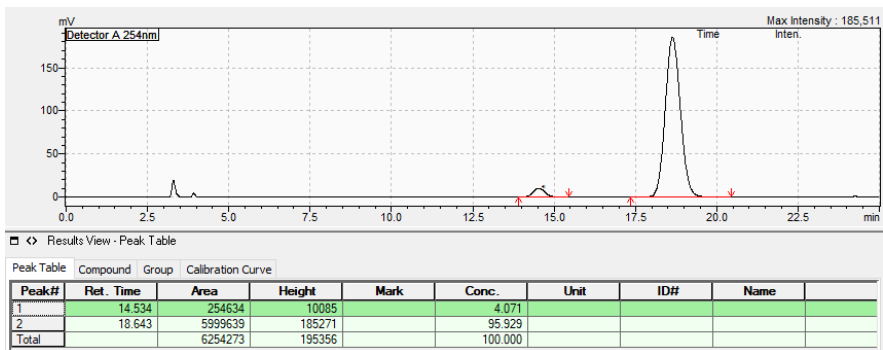

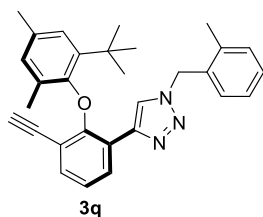

**4-(2-(2-(*tert*-Butyl)-4,6-dimethylphenoxy)-3-ethynylphenyl)-1-(2-methylbenzyl)-1H-1,2,3-triazole (3q)**

82% yield;  $[\alpha]_D^{25} = -52.9$  (c 0.5, CHCl<sub>3</sub>), a white foam,  $R_f = 0.34$  (hexane/ethyl acetate 8:1). <sup>1</sup>H NMR (400 MHz, CDCl<sub>3</sub>) δ 8.41 (dd,  $J = 7.8, 1.8$  Hz, 1H), 7.88 (s, 1H), 7.24 (dd,  $J = 7.6, 1.8$  Hz, 1H), 7.14 (td,  $J = 7.4, 1.4$  Hz, 1H), 7.11 – 7.03 (m, 2H), 6.99 (t,  $J = 7.7$  Hz, 2H), 6.88 (d,  $J = 2.0$  Hz, 1H), 6.67 (d,  $J = 2.1$  Hz, 1H), 5.61 (d,  $J = 14.9$  Hz, 1H), 5.35 (d,  $J = 15.0$  Hz, 1H), 2.57 (s, 1H), 2.23 (s, 3H), 2.21 (s, 3H), 1.70 (s, 3H), 1.17 (s, 9H). <sup>13</sup>C NMR (101 MHz, CDCl<sub>3</sub>) δ 154.2, 151.1, 143.1, 141.9, 136.6, 135.9, 133.9, 132.7, 130.9, 130.4, 129.2, 129.1, 129.0, 128.9, 126.6, 125.3, 123.2, 121.9, 121.6, 110.5, 82.8, 78.5, 52.4, 34.9, 31.0, 21.1, 19.0, 17.2. HRMS (ESI)  $m/z$  calcd for C<sub>30</sub>H<sub>32</sub>N<sub>3</sub>O [M+H]<sup>+</sup> = 450.2540, found = 450.2541; the ee value was 85%,  $t_R$  (minor) = 11.4 min,  $t_R$  (major) = 17.9 min (Chiralpak IC,  $\lambda = 254$  nm, 10% *i*-PrOH/Hexane, flow rate = 1.0 mL/min).

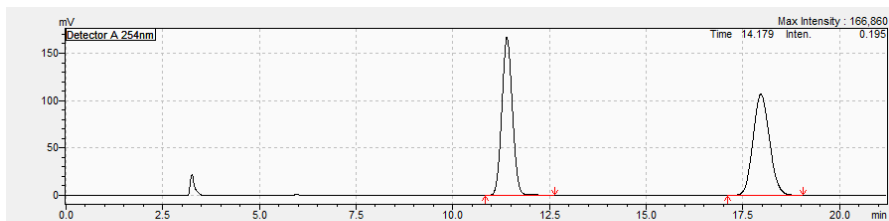

Results View - Peak Table

| Peak# | Ret. Time | Area    | Height | Mark | Conc.   | Unit | ID# | Name | Area%   |
|-------|-----------|---------|--------|------|---------|------|-----|------|---------|
| 1     | 11.402    | 3168411 | 166713 |      | 50.083  |      |     |      | 50.083  |
| 2     | 17.968    | 3157955 | 106555 |      | 49.917  |      |     |      | 49.917  |
| Total |           | 6326365 | 273268 |      | 100.000 |      |     |      | 100.000 |

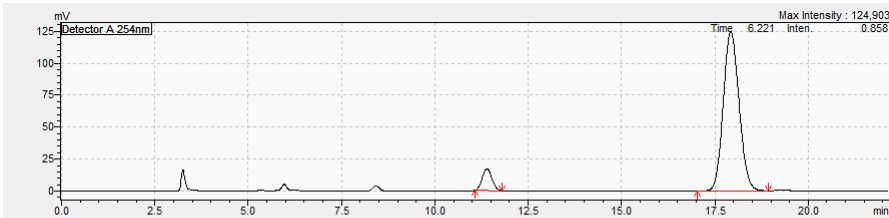

Results View - Peak Table

| Peak# | Ret. Time | Area    | Height | Mark | Conc.   | Unit | ID# | Name | Area%   |
|-------|-----------|---------|--------|------|---------|------|-----|------|---------|
| 1     | 11.394    | 305828  | 17002  | M    | 7.668   |      |     |      | 7.668   |
| 2     | 17.925    | 3682536 | 124837 |      | 92.332  |      |     |      | 92.332  |
| Total |           | 3988363 | 141839 |      | 100.000 |      |     |      | 100.000 |

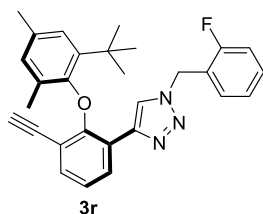

**4-(2-(2-(*tert*-Butyl)-4,6-dimethylphenoxy)-3-ethynylphenyl)-1-(2-fluorobenzyl)-1H-1,2,3-triazole (3r)**

76% yield;  $[\alpha]_D^{25} = -71.7$  (c 0.5,  $\text{CHCl}_3$ ), a white foam,  $R_f = 0.32$  (hexane/ethyl acetate 8:1).  $^1\text{H}$  NMR (400 MHz,  $\text{CDCl}_3$ )  $\delta$  8.40 (d,  $J = 7.9$  Hz, 1H), 8.05 (s, 1H), 7.32 – 7.13 (m, 3H), 7.07 – 6.96 (m, 3H), 6.90 (s, 1H), 6.69 (s, 1H), 5.59 (d,  $J = 15.1$  Hz, 1H), 5.47 (d,  $J = 15.1$  Hz, 1H), 2.58 (s, 1H), 2.24 (s, 3H), 1.73 (s, 3H), 1.22 (s, 9H).  $^{13}\text{C}$  NMR (101 MHz,  $\text{CDCl}_3$ )  $\delta$  161.6, 151.0, 143.4, 142.0, 135.9, 133.9, 130.7, 130.7, 130.5, 130.24, 130.21, 129.2, 129.1, 125.3, 124.8, 124.7, 123.5, 121.9, 121.5, 115.8, 115.6, 110.5, 82.8, 78.5, 47.7, 47.6, 34.9, 31.0, 21.1, 17.2. HRMS (ESI)  $m/z$  calcd for  $\text{C}_{29}\text{H}_{29}\text{FN}_3\text{O}$   $[\text{M}+\text{H}]^+ = 454.2289$ , found = 454.2291; the ee value was 90%,  $t_R$  (minor) = 11.6 min,  $t_R$  (major) = 16.5 min (Chiralpak IC,  $\lambda = 254$  nm, 10% *i*-PrOH/Hexane, flow rate = 1.0 mL/min).

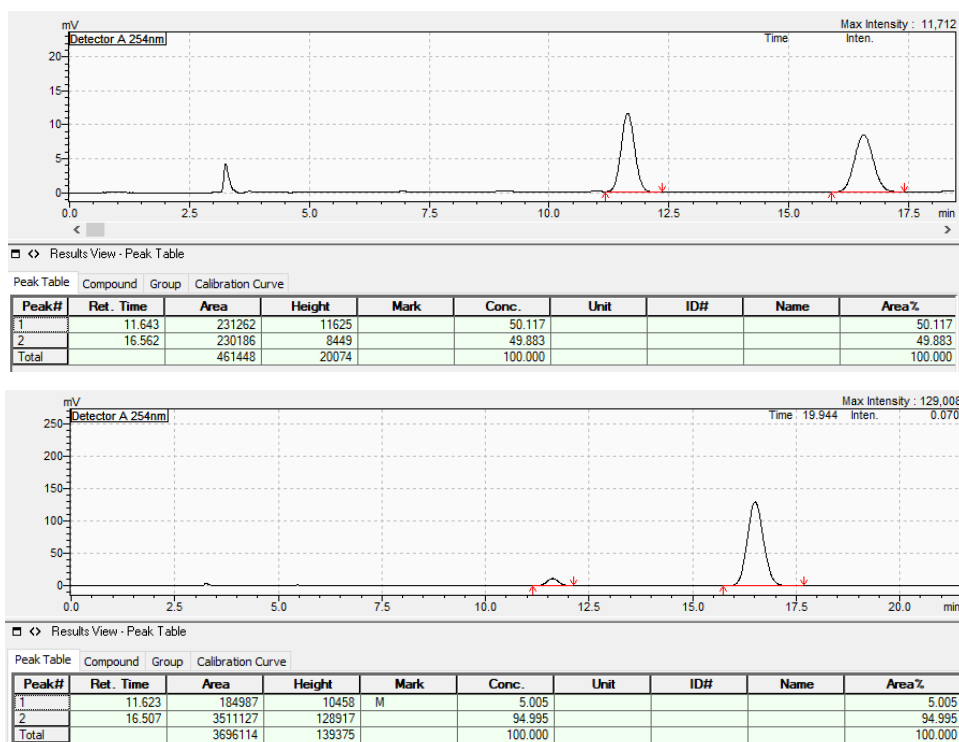

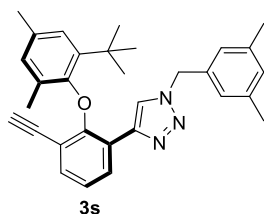

3s

#### 4-(2-(2-(*tert*-Butyl)-4,6-dimethylphenoxy)-3-ethynylphenyl)-1-(3,5-dimethylbenzyl)-1H-1,2,3-triazole (3s)

73% yield;  $[\alpha]_D^{25} = -53.9$  (c 0.5,  $\text{CHCl}_3$ ), a white foam,  $R_f = 0.36$  (hexane/ethyl acetate 8:1).  $^1\text{H}$  NMR (400 MHz,  $\text{CDCl}_3$ )  $\delta$  8.42 (dd,  $J = 7.8, 1.8$  Hz, 1H), 7.97 (s, 1H), 7.25 (dd,  $J = 7.7, 1.8$  Hz, 1H), 7.05 – 6.67 (m, 6H), 5.49 (d,  $J = 14.8$  Hz, 1H), 5.26 (d,  $J = 14.9$  Hz, 1H), 2.58 (s, 1H), 2.24 (s, 3H), 2.17 (s, 6H), 1.73 (s, 3H), 1.20 (s, 9H).  $^{13}\text{C}$  NMR (101 MHz,  $\text{CDCl}_3$ )  $\delta$  154.1, 151.0, 143.3, 141.9, 138.7, 135.8, 134.6, 133.9, 130.5, 130.2, 129.2, 129.1, 125.6, 125.3, 123.3, 121.9, 121.6, 110.5, 82.8, 78.5, 54.2, 34.9, 31.0, 21.2, 21.1, 17.2. HRMS (ESI)  $m/z$  calcd for  $\text{C}_{31}\text{H}_{34}\text{N}_3\text{O}$   $[\text{M}+\text{H}]^+ = 464.2696$ , found = 464.2709; the ee value was 90%,  $t_R$  (minor) = 12.6 min,  $t_R$  (major) = 17.1 min (Chiralpak IC,  $\lambda = 254$  nm, 10% *i*-PrOH/Hexane, flow rate = 1.0 mL/min).

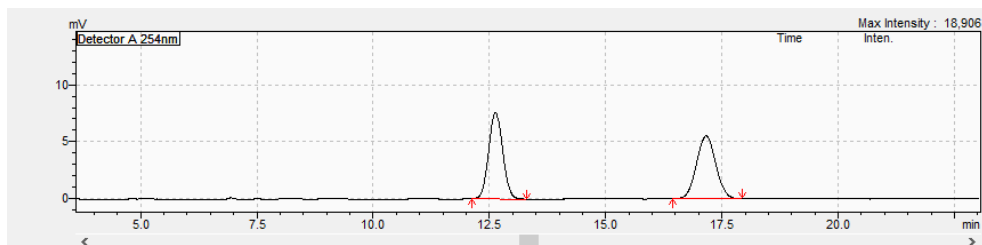

Results View - Peak Table

Peak Table Compound Group Calibration Curve

| Peak# | Ret. Time | Area   | Height | Mark | Conc.   | Unit | ID# | Name |
|-------|-----------|--------|--------|------|---------|------|-----|------|
| 1     | 12.633    | 159779 | 7598   |      | 50.021  |      |     |      |
| 2     | 17.159    | 159646 | 5535   |      | 49.979  |      |     |      |
| Total |           | 319425 | 13133  |      | 100.000 |      |     |      |

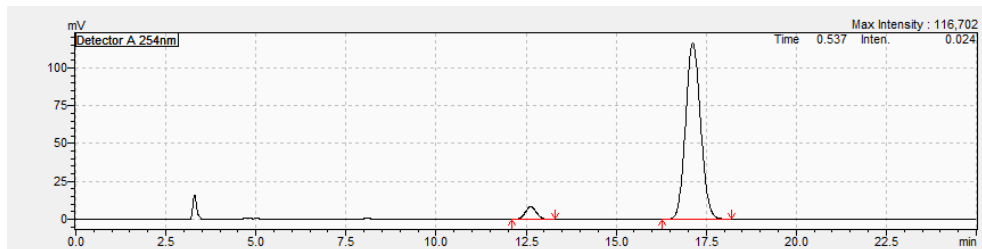

Results View - Peak Table

Peak Table Compound Group Calibration Curve

| Peak# | Ret. Time | Area    | Height | Mark | Conc.   | Unit | ID# | Name |
|-------|-----------|---------|--------|------|---------|------|-----|------|
| 1     | 12.629    | 179183  | 8505   |      | 5.021   |      |     |      |
| 2     | 17.129    | 3389205 | 116751 |      | 94.979  |      |     |      |
| Total |           | 3568388 | 125256 |      | 100.000 |      |     |      |

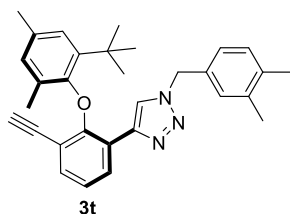

**4-(2-(2-(*tert*-Butyl)-4,6-dimethylphenoxy)-3-ethynylphenyl)-1-(3,4-dimethylbenzyl)-1H-1,2,3-triazole (3t)**

75% yield;  $[\alpha]_D^{25} = -91.0$  (c 0.5,  $\text{CHCl}_3$ ), a white foam,  $R_f = 0.33$  (hexane/ethyl acetate 8:1).  $^1\text{H}$  NMR (400 MHz,  $\text{CDCl}_3$ )  $\delta$  8.41 (dd,  $J = 7.8, 1.8$  Hz, 1H), 7.94 (s, 1H), 7.24 (dd,  $J = 7.7, 1.8$  Hz, 1H), 7.02 – 6.85 (m, 5H), 6.69 (dt,  $J = 2.4, 0.8$  Hz, 1H), 5.49 (d,  $J = 14.8$  Hz, 1H), 5.28 (d,  $J = 14.8$  Hz, 1H), 2.57 (s, 1H), 2.24 (s, 3H), 2.14 (s, 3H), 2.12 (s, 3H), 1.72 (s, 3H), 1.19 (s, 9H).  $^{13}\text{C}$  NMR (101 MHz,  $\text{CDCl}_3$ )  $\delta$  154.1, 151.0, 143.2, 141.9, 137.3, 137.1, 135.8, 133.9, 132.1, 130.5, 130.2, 129.20, 129.15, 125.4, 125.3, 123.2, 121.9, 121.6, 110.5, 82.8, 78.5, 54.1, 34.9, 31.0, 21.1, 19.7, 19.4, 17.2. HRMS (ESI)  $m/z$  calcd for  $\text{C}_{31}\text{H}_{34}\text{N}_3\text{O}$   $[\text{M}+\text{H}]^+ = 464.2696$ , found = 464.2708; the ee value was 91%,  $t_R$  (minor) = 14.4 min,  $t_R$  (major) = 19.4 min (Chiralpak IC,  $\lambda = 254$  nm, 10% *i*-PrOH/Hexane, flow rate = 1.0 mL/min).

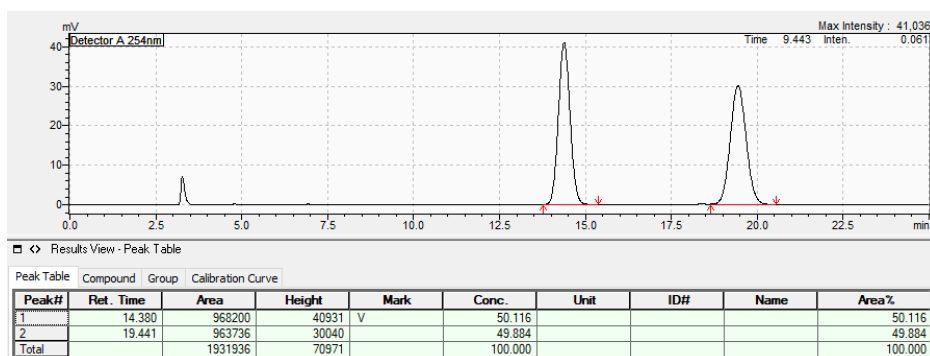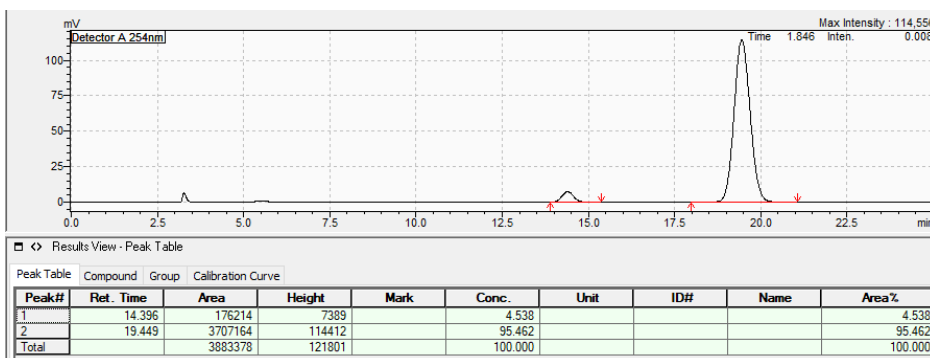



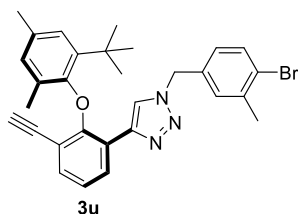

**1-(4-Bromo-3-methylbenzyl)-4-(2-(2-(*tert*-butyl)-4,6-dimethylphenoxy)-3-ethynylphenyl)-1H-1,2,3-triazole (3u)**

78% yield;  $[\alpha]_D^{25} = -71.4$  (c 0.5,  $\text{CHCl}_3$ ), a white foam,  $R_f = 0.35$  (hexane/ethyl acetate 8:1).  $^1\text{H}$  NMR (400 MHz,  $\text{CDCl}_3$ )  $\delta$  8.41 (dd,  $J = 7.8, 1.8$  Hz, 1H), 7.96 (s, 1H), 7.38 (d,  $J = 8.1$  Hz, 1H), 7.25 (dd,  $J = 7.6, 1.5$  Hz, 1H), 7.05 – 6.96 (m, 2H), 6.91 (d,  $J = 2.2$  Hz, 1H), 6.84 (dd,  $J = 8.2, 2.3$  Hz, 1H), 6.69 (d,  $J = 2.2$  Hz, 1H), 5.49 (d,  $J = 15.0$  Hz, 1H), 5.27 (d,  $J = 15.0$  Hz, 1H), 2.58 (s, 1H), 2.26 (s, 3H), 2.24 (s, 3H), 1.73 (s, 3H), 1.19 (s, 9H).  $^{13}\text{C}$  NMR (101 MHz,  $\text{CDCl}_3$ )  $\delta$  154.1, 151.0, 141.9, 138.8, 135.9, 134.0, 134.0, 133.0, 130.4, 130.2, 129.2, 129.1, 126.7, 125.4, 122.0, 121.5, 110.5, 82.9, 78.4, 53.5, 35.0, 31.0, 22.9, 21.1, 17.2. HRMS (ESI)  $m/z$  calcd for  $\text{C}_{30}\text{H}_{31}\text{BrN}_3\text{O}$   $[\text{M}+\text{H}]^+ = 528.1645$ , found = 528.1647; the ee value was 92%,  $t_R$  (minor) = 12.0 min,  $t_R$  (major) = 16.4 min (Chiralpak IC,  $\lambda = 254$  nm, 10% *i*-PrOH/Hexane, flow rate = 1.0 mL/min).

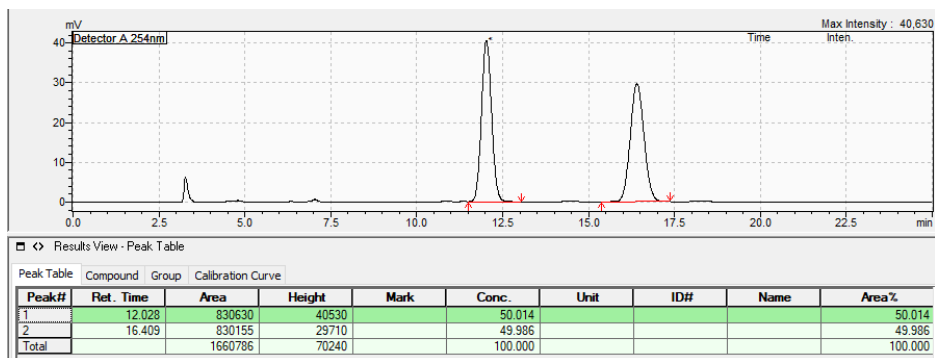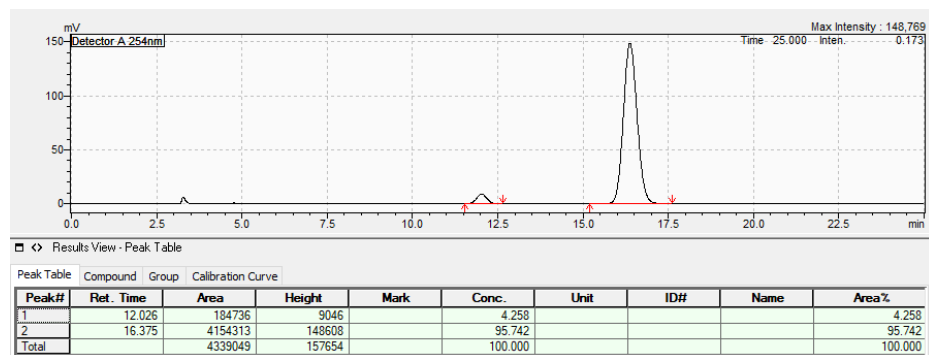

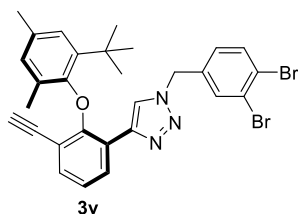

**4-(2-(2-(*tert*-Butyl)-4,6-dimethylphenoxy)-3-ethynylphenyl)-1-(3,4-dibromobenzyl)-1H-1,2,3-triazole (3v)**

68% yield;  $[\alpha]_D^{25} = -32.1$  (c 0.5,  $\text{CHCl}_3$ ), a white foam,  $R_f = 0.31$  (hexane/ethyl acetate 8:1).  $^1\text{H}$  NMR (400 MHz,  $\text{CDCl}_3$ )  $\delta$  8.41 (dd,  $J = 7.8, 1.8$  Hz, 1H), 7.98 (s, 1H), 7.49 (d,  $J = 8.3$  Hz, 1H), 7.42 (d,  $J = 2.2$  Hz, 1H), 7.27 (dd,  $J = 7.7, 1.8$  Hz, 1H), 7.09 – 6.90 (m, 3H), 6.77 – 6.65 (m, 1H), 5.51 (d,  $J = 15.3$  Hz, 1H), 5.29 (d,  $J = 15.3$  Hz, 1H), 2.59 (s, 1H), 2.25 (s, 3H), 1.74 (s, 3H), 1.21 (s, 9H).  $^{13}\text{C}$  NMR (101 MHz,  $\text{CDCl}_3$ )  $\delta$  154.1, 150.9, 143.8, 141.9, 136.0, 135.7, 134.2, 134.1, 132.8, 130.4, 129.2, 129.1, 127.8, 125.4, 123.2, 122.0, 121.3, 110.5, 83.0, 78.4, 52.8, 35.0, 31.0, 21.1, 17.3. HRMS (ESI)  $m/z$  calcd for  $\text{C}_{29}\text{H}_{28}\text{Br}_2\text{N}_3\text{O}$   $[\text{M}+\text{H}]^+ = 592.0594$ , found = 592.0597; the ee value was 98%,  $t_R$  (minor) = 12.5 min,  $t_R$  (major) = 18.2 min (Chiralpak IC,  $\lambda = 254$  nm, 10% *i*-PrOH/Hexane, flow rate = 1.0 mL/min).

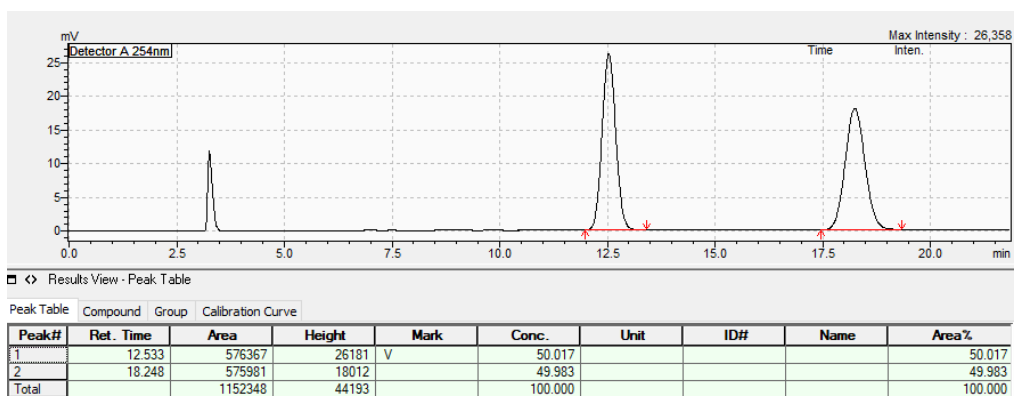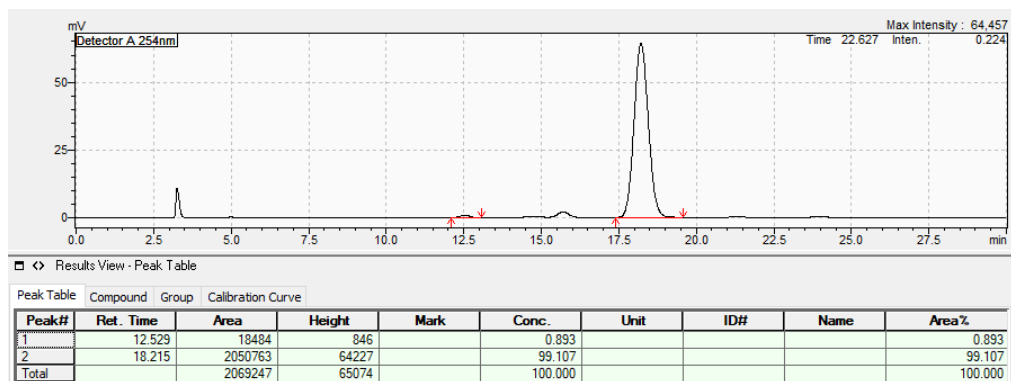

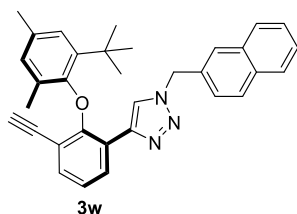

**4-(2-(2-(*tert*-Butyl)-4,6-dimethylphenoxy)-3-ethynylphenyl)-1-(naphthalen-2-ylmethyl)-1H-1,2,3-triazole (3w)**

82% yield;  $[\alpha]_D^{25} = -91.1$  (c 0.5,  $\text{CHCl}_3$ ), a white foam,  $R_f = 0.33$  (hexane/ethyl acetate 8:1).  $^1\text{H}$  NMR (400 MHz,  $\text{CDCl}_3$ )  $\delta$  8.42 (dd,  $J = 7.8, 1.8$  Hz, 1H), 8.02 (s, 1H), 7.72 (dd,  $J = 7.4, 4.4$  Hz, 3H), 7.64 – 7.57 (m, 1H), 7.47 – 7.37 (m, 2H), 7.30 – 7.22 (m, 2H), 6.99 (t,  $J = 7.7$  Hz, 1H), 6.85 (d,  $J = 2.2$  Hz, 1H), 6.66 (d,  $J = 2.2$  Hz, 1H), 5.73 (d,  $J = 15.0$  Hz, 1H), 5.52 (d,  $J = 15.0$  Hz, 1H), 2.56 (s, 1H), 2.22 (s, 3H), 1.71 (s, 3H), 1.11 (s, 9H).  $^{13}\text{C}$  NMR (101 MHz,  $\text{CDCl}_3$ )  $\delta$  154.1, 151.1, 143.5, 141.9, 135.9, 133.9, 133.2, 133.1, 132.2, 130.4, 129.2, 129.1, 129.1, 128.0, 127.7, 127.0, 126.6, 126.6, 125.3, 125.1, 123.4, 121.9, 121.5, 110.5, 82.8, 78.5, 54.4, 34.9, 30.9, 21.1, 17.3. HRMS (ESI)  $m/z$  calcd for  $\text{C}_{33}\text{H}_{32}\text{N}_3\text{O}$   $[\text{M}+\text{H}]^+ = 486.2540$ , found = 486.2542; the ee value was 90%,  $t_R$  (minor) = 16.0 min,  $t_R$  (major) = 20.8 min (Chiralpak IC,  $\lambda = 254$  nm, 10% *i*-PrOH/Hexane, flow rate = 1.0 mL/min).

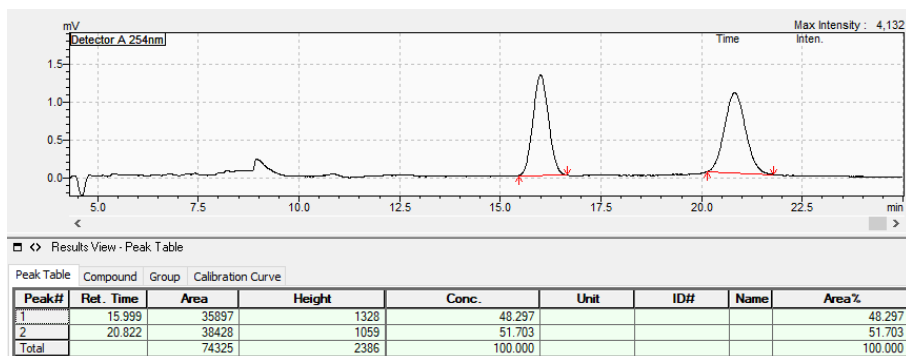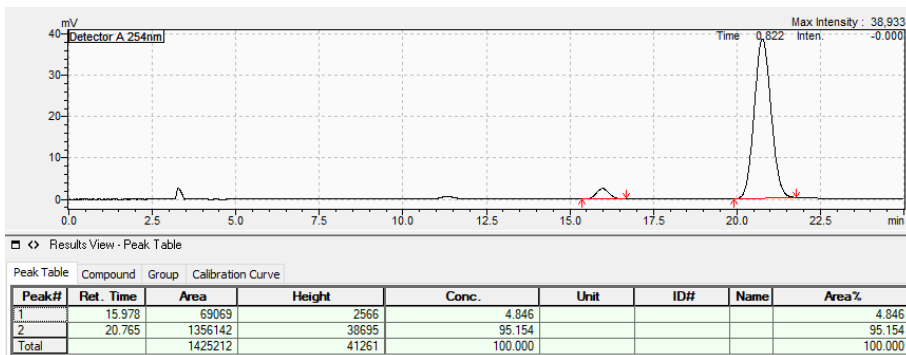

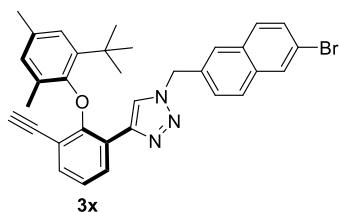

**1-((6-Bromonaphthalen-2-yl)methyl)-4-(2-(2-(*tert*-butyl)-4,6-dimethylphenoxy)-3-ethynylphenyl)-1*H*-1,2,3-triazole (3x)**

77% yield;  $[\alpha]_D^{25} = -86.3$  (c 0.5,  $\text{CHCl}_3$ ), a white foam,  $R_f = 0.33$  (hexane/ethyl acetate 8:1).  $^1\text{H}$  NMR (400 MHz,  $\text{CDCl}_3$ )  $\delta$  8.42 (d,  $J = 7.8$  Hz, 1H), 8.01 (d,  $J = 1.7$  Hz, 1H), 7.90 (s, 1H), 7.62 (d,  $J = 8.5$  Hz, 1H), 7.55 (d,  $J = 9.6$  Hz, 2H), 7.48 (dd,  $J = 8.7, 1.8$  Hz, 1H), 7.26 (t,  $J = 8.6$  Hz, 2H), 7.04 – 6.95 (m, 1H), 6.87 (s, 1H), 6.67 (s, 1H), 5.72 (d,  $J = 15.1$  Hz, 1H), 5.50 (d,  $J = 15.1$  Hz, 1H), 2.57 (s, 1H), 2.22 (s, 3H), 1.72 (s, 3H), 1.12 (s, 9H).  $^{13}\text{C}$  NMR (101 MHz,  $\text{CDCl}_3$ )  $\delta$  154.1, 150.1, 141.9, 135.9, 134.1, 134.0, 132.8, 131.6, 130.4, 130.0, 129.8, 129.6, 129.2, 129.1, 128.2, 126.9, 126.2, 125.4, 123.4, 122.0, 121.5, 110.5, 82.9, 78.4, 54.1, 34.9, 30.9, 21.1, 17.3. HRMS (ESI)  $m/z$  calcd for  $\text{C}_{33}\text{H}_{31}\text{BrN}_3\text{O}$   $[\text{M}+\text{H}]^+ = 564.1645$ , found = 564.1647; the ee value was 90%,  $t_R$  (minor) = 16.4 min,  $t_R$  (major) = 21.5 min (Chiralpak IC,  $\lambda = 254$  nm, 10% *i*-PrOH/Hexane, flow rate = 1.0 mL/min).

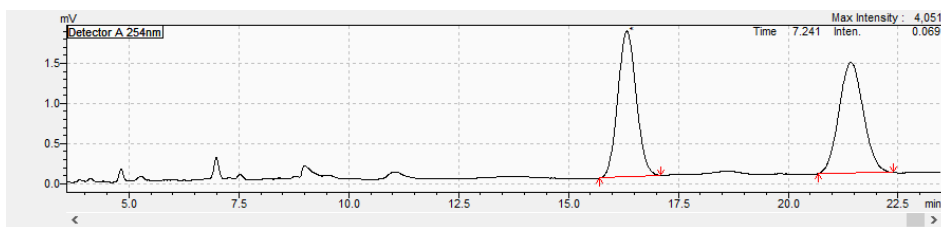

Results View - Peak Table

| Peak# | Ret. Time | Area   | Height | Mark | Conc.   | Unit | ID# | Name | Area%   |
|-------|-----------|--------|--------|------|---------|------|-----|------|---------|
| 1     | 16.327    | 53156  | 1819   |      | 50.024  |      |     |      | 50.024  |
| 2     | 21.418    | 53105  | 1380   |      | 49.976  |      |     |      | 49.976  |
| Total |           | 106261 | 3198   |      | 100.000 |      |     |      | 100.000 |

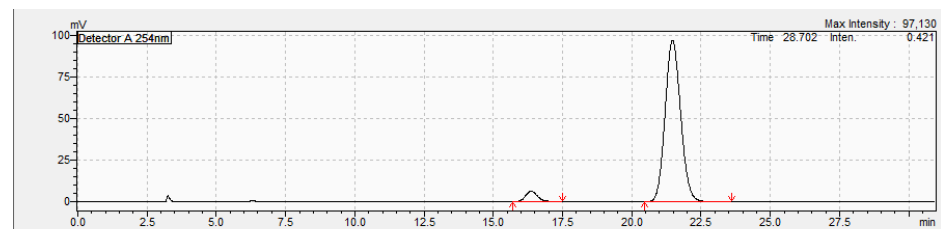

Results View - Peak Table

| Peak# | Ret. Time | Area    | Height | Mark | Conc.   | Unit | ID# | Name | Area%   |
|-------|-----------|---------|--------|------|---------|------|-----|------|---------|
| 1     | 16.367    | 195886  | 6328   |      | 4.901   |      |     |      | 4.901   |
| 2     | 21.470    | 3800929 | 97088  |      | 95.099  |      |     |      | 95.099  |
| Total |           | 3996815 | 103416 |      | 100.000 |      |     |      | 100.000 |

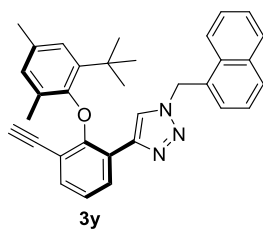

### 4-(2-(2-(*tert*-Butyl)-4,6-dimethylphenoxy)-3-ethynylphenyl)-1-(naphthalen-1-ylmethyl)-1H-1,2,3-triazole (3y)

78% yield;  $[\alpha]_D^{25} = -61.8$  (c 0.5,  $\text{CHCl}_3$ ), a white foam,  $R_f = 0.30$  (hexane/ethyl acetate 8:1).  $^1\text{H}$  NMR (400 MHz,  $\text{CDCl}_3$ )  $\delta$  8.40 (dd,  $J = 7.9, 1.8$  Hz, 1H), 7.99 – 7.86 (m, 2H), 7.82 – 7.72 (m, 2H), 7.47 – 7.38 (m, 2H), 7.37 – 7.20 (m, 3H), 6.97 (t,  $J = 7.7$  Hz, 1H), 6.84 (d,  $J = 2.2$  Hz, 1H), 6.64 (d,  $J = 2.2$  Hz, 1H), 6.12 (d,  $J = 15.0$  Hz, 1H), 5.74 (d,  $J = 15.0$  Hz, 1H), 2.54 (s, 1H), 2.21 (s, 3H), 1.65 (s, 3H), 1.03 (s, 9H).  $^{13}\text{C}$  NMR (101 MHz,  $\text{CDCl}_3$ )  $\delta$  154.1, 151.0, 141.9, 135.8, 133.9, 133.8, 131.0, 130.3, 130.0, 129.8, 129.1, 129.1, 128.95, 127.4, 127.2, 126.3, 125.3, 125.2, 122.8, 121.9, 121.5, 110.5, 82.8, 78.4, 52.4, 34.8, 30.9, 21.1, 17.2. HRMS (ESI)  $m/z$  calcd for  $\text{C}_{33}\text{H}_{32}\text{N}_3\text{O}$   $[\text{M}+\text{H}]^+ = 486.2540$ , found = 486.2543; the ee value was 93%,  $t_R$  (minor) = 14.3 min,  $t_R$  (major) = 23.1 min (Chiralpak IC,  $\lambda = 254$  nm, 10% *i*-PrOH/Hexane, flow rate = 1.0 mL/min).

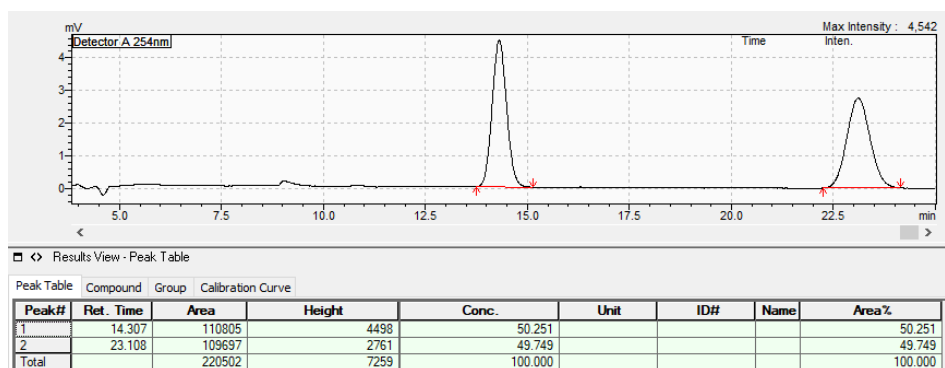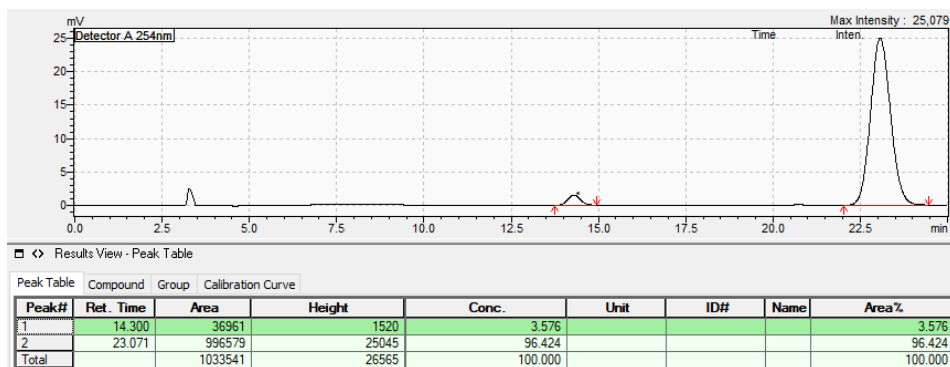

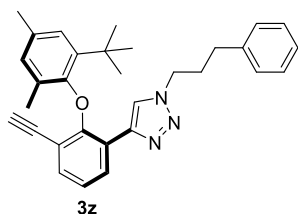

3z

**4-(2-(2-(*tert*-Butyl)-4,6-dimethylphenoxy)-3-ethynylphenyl)-1-(3-phenylpropyl)-1H-1,2,3-triazole (3z)**

83% yield;  $[\alpha]_D^{25} = -55.8$  (c 0.5,  $\text{CHCl}_3$ ), a white foam,  $R_f = 0.32$  (hexane/ethyl acetate 8:1).  $^1\text{H}$  NMR (400 MHz,  $\text{CDCl}_3$ )  $\delta$  8.42 (d,  $J = 7.7$  Hz, 1H), 8.02 (s, 1H), 7.31 – 6.91 (m, 9H), 6.72 (s, 1H), 4.39 – 4.18 (m, 2H), 2.64 – 2.48 (m, 3H), 2.26 (s, 3H), 2.22 – 2.09 (m, 2H), 1.77 (s, 3H), 1.30 (s, 9H).  $^{13}\text{C}$  NMR (101 MHz,  $\text{CDCl}_3$ )  $\delta$  154.1, 151.0, 141.9, 140.1, 135.8, 134.0, 130.4, 129.3, 129.1, 128.6, 128.4, 126.3, 125.4, 122.0, 121.7, 110.5, 82.9, 49.5, 35.1, 32.5, 31.8, 31.2, 21.1, 17.3. HRMS (ESI)  $m/z$  calcd for  $\text{C}_{31}\text{H}_{34}\text{N}_3\text{O}$   $[\text{M}+\text{H}]^+ = 464.2696$ , found = 464.2696; the ee value was 85%,  $t_R$  (minor) = 10.1 min,  $t_R$  (major) = 13.6 min (Chiralpak IC,  $\lambda = 254$  nm, 10% *i*-PrOH/Hexane, flow rate = 1.0 mL/min).

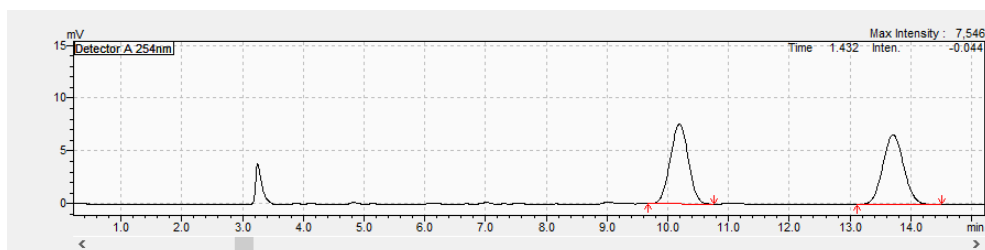

Results View - Peak Table

| Peak# | Ret. Time | Area   | Height | Mark | Conc.   | Unit | ID# | Name | Area%   |
|-------|-----------|--------|--------|------|---------|------|-----|------|---------|
| 1     | 10.192    | 157050 | 7580   |      | 49.844  |      |     |      | 49.844  |
| 2     | 13.710    | 158031 | 6589   |      | 50.156  |      |     |      | 50.156  |
| Total |           | 315081 | 14169  |      | 100.000 |      |     |      | 100.000 |

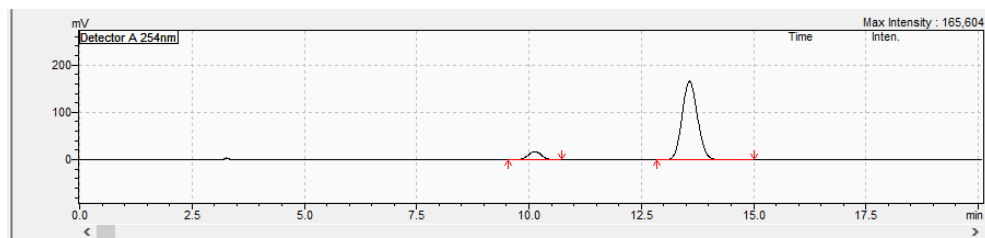

Results View - Peak Table

| Peak# | Ret. Time | Area    | Height | Mark | Conc.   | Unit | ID# | Name | Area%   |
|-------|-----------|---------|--------|------|---------|------|-----|------|---------|
| 1     | 10.131    | 323437  | 16711  | M    | 7.509   |      |     |      | 7.509   |
| 2     | 13.574    | 3984164 | 166013 | M    | 92.491  |      |     |      | 92.491  |
| Total |           | 4307601 | 182724 |      | 100.000 |      |     |      | 100.000 |

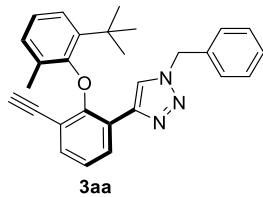

### 1-Benzyl-4-(2-(2-(*tert*-butyl)-6-methylphenoxy)-3-ethynylphenyl)-1*H*-1,2,3-triazole (3aa)

73% yield;  $[\alpha]_D^{25} = -65.1$  (c 0.5,  $\text{CHCl}_3$ ), a white foam,  $R_f = 0.30$  (hexane/ethyl acetate 8:1).  $^1\text{H}$  NMR (400 MHz,  $\text{CDCl}_3$ )  $\delta$  8.42 (dd,  $J = 7.8, 1.8$  Hz, 1H), 7.97 (s, 1H), 7.29 – 7.14 (m, 6H), 7.09 (dd,  $J = 7.9, 1.8$  Hz, 1H), 6.99 (dt,  $J = 12.4, 7.8$  Hz, 2H), 6.91 – 6.81 (m, 1H), 5.60 (d,  $J = 14.9$  Hz, 1H), 5.36 (d,  $J = 14.9$  Hz, 1H), 2.56 (s, 1H), 1.76 (s, 3H), 1.19 (s, 9H).  $^{13}\text{C}$  NMR (101 MHz,  $\text{CDCl}_3$ )  $\delta$  153.9, 153.3, 143.4, 142.3, 135.8, 134.8, 130.8, 129.2, 129.1, 128.8, 128.61, 127.8, 124.6, 123.3, 122.1, 121.6, 110.5, 82.7, 78.3, 54.2, 35.1, 31.0, 17.3. HRMS (ESI)  $m/z$  calcd for  $\text{C}_{28}\text{H}_{28}\text{N}_3\text{O}$   $[\text{M}+\text{H}]^+ = 422.2227$ , found = 422.2227; the ee value was 99%,  $t_R$  (minor) = 12.2 min,  $t_R$  (major) = 13.8 min (Chiralpak IC,  $\lambda = 254$  nm, 10% *i*-PrOH/Hexane, flow rate = 1.0 mL/min).

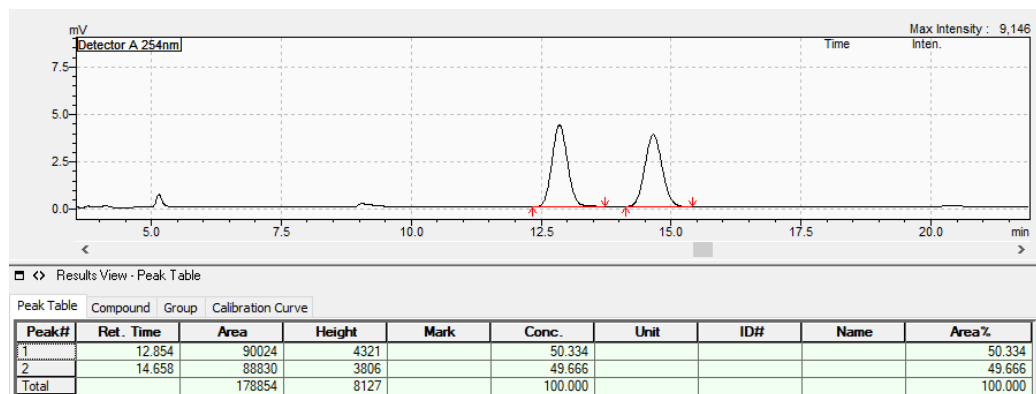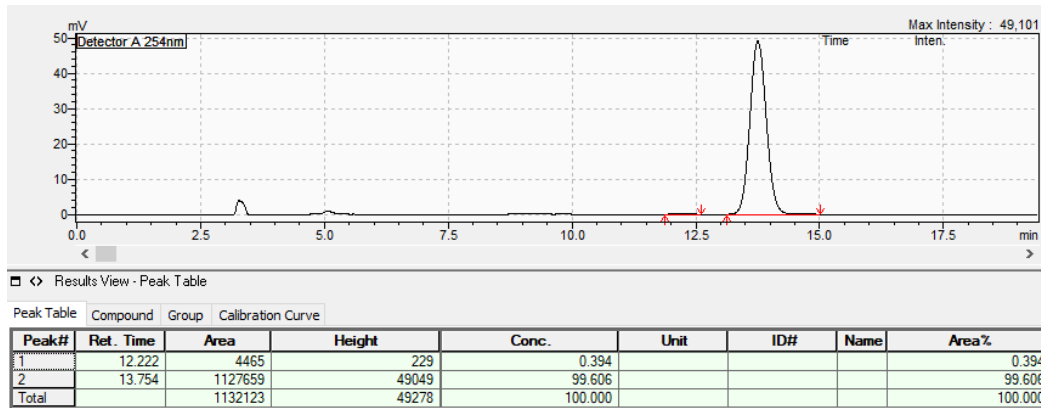

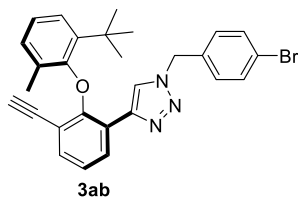

### 1-(4-Bromobenzyl)-4-(2-(2-(*tert*-butyl)-6-methylphenoxy)-3-ethynylphenyl)-1H-1,2,3-triazole (**3ab**)

81% yield;  $[\alpha]_D^{25} = -67.3$  (c 0.5,  $\text{CHCl}_3$ ), a white foam,  $R_f = 0.33$  (hexane/ethyl acetate 8:1).  $^1\text{H}$  NMR (400 MHz,  $\text{CDCl}_3$ )  $\delta$  8.41 (dd,  $J = 7.9, 1.7$  Hz, 1H), 7.96 (d,  $J = 0.9$  Hz, 1H), 7.43 – 7.35 (m, 2H), 7.26 (dt,  $J = 7.6, 1.4$  Hz, 1H), 7.11 (dd,  $J = 7.9, 1.7$  Hz, 1H), 7.08 – 6.95 (m, 4H), 6.87 (dd,  $J = 7.4, 1.7$  Hz, 1H), 5.54 (d,  $J = 15.1$  Hz, 1H), 5.32 (d,  $J = 15.1$  Hz, 1H), 2.56 (s, 1H), 1.77 (s, 3H), 1.21 (s, 9H).  $^{13}\text{C}$  NMR (101 MHz,  $\text{CDCl}_3$ )  $\delta$  153.9, 153.2, 143.5, 142.3, 135.9, 133.8, 132.2, 130.8, 129.5, 129.2, 128.9, 124.7, 123.2, 122.8, 122.1, 121.4, 110.6, 82.8, 78.3, 53.5, 35.1, 31.0, 17.4. HRMS (ESI)  $m/z$  calcd for  $\text{C}_{28}\text{H}_{27}\text{BrN}_3\text{O}$   $[\text{M}+\text{H}]^+ = 500.1332$ , found = 500.1335; the ee value was 97%,  $t_R$  (minor) = 12.7 min,  $t_R$  (major) = 14.5 min (Chiralpak IC,  $\lambda = 254$  nm, 10% *i*-PrOH/Hexane, flow rate = 1.0 mL/min).

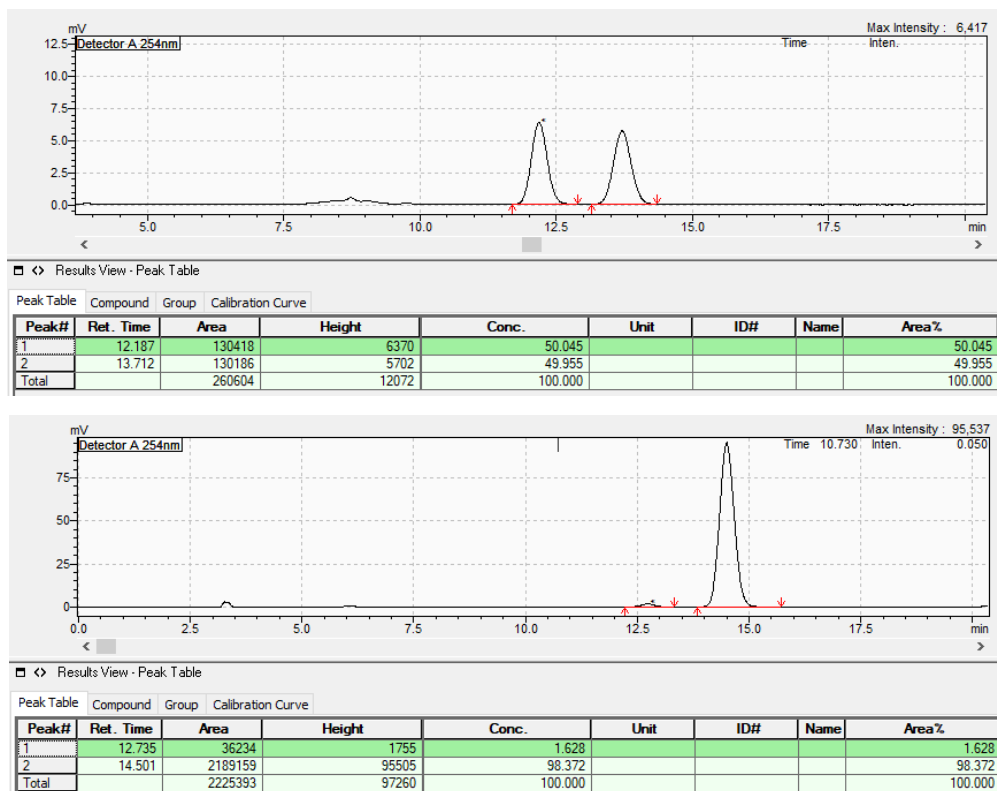



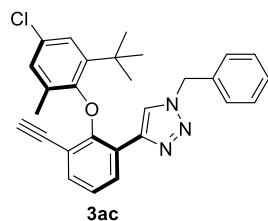

**1-Benzyl-4-(2-(2-(*tert*-butyl)-4-chloro-6-methylphenoxy)-3-ethynylphenyl)-1*H*-1,2,3-triazole (3ac)**

75% yield;  $[\alpha]_D^{25} = -76.0$  (c 0.5,  $\text{CHCl}_3$ ), a white foam,  $R_f = 0.30$  (hexane/ethyl acetate 8:1).  $^1\text{H}$  NMR (400 MHz,  $\text{CDCl}_3$ )  $\delta$  8.41 (d,  $J = 7.9$  Hz, 1H), 7.89 (s, 1H), 7.29 – 7.22 (m, 4H), 7.22 – 7.15 (m, 2H), 7.12 – 7.01 (m, 2H), 6.87 (d,  $J = 2.6$  Hz, 1H), 5.60 (d,  $J = 14.9$  Hz, 1H), 5.37 (d,  $J = 14.9$  Hz, 1H), 2.66 (s, 1H), 1.72 (s, 3H), 1.17 (s, 9H).  $^{13}\text{C}$  NMR (101 MHz,  $\text{CDCl}_3$ )  $\delta$  153.4, 151.7, 144.1, 135.9, 134.6, 132.4, 129.6, 129.4, 129.1, 128.7, 128.3, 127.9, 124.8, 122.4, 121.6, 110.4, 83.5, 78.2, 54.3, 35.3, 30.7, 17.3. HRMS (ESI)  $m/z$  calcd for  $\text{C}_{28}\text{H}_{27}\text{ClN}_3\text{O}$   $[\text{M}+\text{H}]^+ = 456.1837$ , found = 456.1843; the ee value was 96%,  $t_R$  (minor) = 12.4 min,  $t_R$  (major) = 14.9 min (Chiralpak IC,  $\lambda = 254$  nm, 10% *i*-PrOH/Hexane, flow rate = 1.0 mL/min).

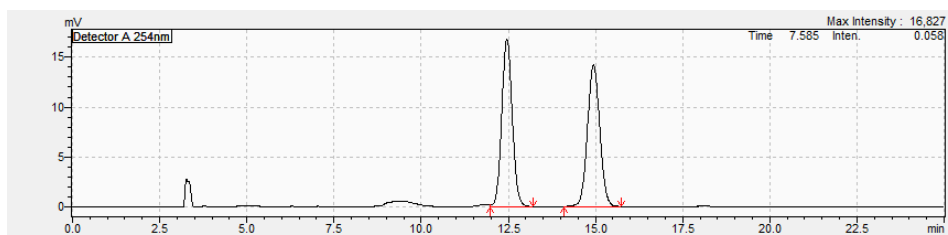

Results View - Peak Table

| Peak# | Ret. Time | Area   | Height | Conc.   | Unit | ID# | Name | Area%   |
|-------|-----------|--------|--------|---------|------|-----|------|---------|
| 1     | 12.458    | 351083 | 16764  | 50.173  |      |     |      | 50.173  |
| 2     | 14.945    | 348660 | 14137  | 49.827  |      |     |      | 49.827  |
| Total |           | 699742 | 30901  | 100.000 |      |     |      | 100.000 |

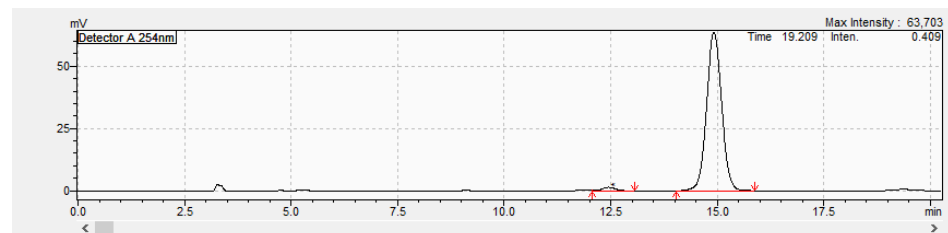

Results View - Peak Table

| Peak# | Ret. Time | Area    | Height | Conc.   | Unit | ID# | Name | Area%   |
|-------|-----------|---------|--------|---------|------|-----|------|---------|
| 1     | 12.449    | 30032   | 1410   | 1.884   |      |     |      | 1.884   |
| 2     | 14.922    | 1563811 | 63700  | 98.116  |      |     |      | 98.116  |
| Total |           | 1593843 | 65110  | 100.000 |      |     |      | 100.000 |

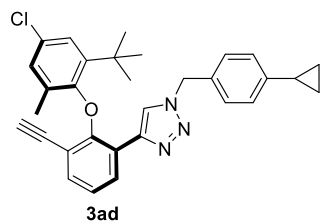

### 4-(2-(2-(*tert*-Butyl)-4-chloro-6-methylphenoxy)-3-ethynylphenyl)-1-(4-cyclopropylbenzyl)-1*H*-1,2,3-triazole (3ad)

69% yield;  $[\alpha]_D^{25} = -86.1$  (c 0.5,  $\text{CHCl}_3$ ), a white foam,  $R_f = 0.33$  (hexane/ethyl acetate 8:1).  $^1\text{H}$  NMR (400 MHz,  $\text{CDCl}_3$ )  $\delta$  8.39 (dd,  $J = 7.8, 1.8$  Hz, 1H), 7.84 (s, 1H), 7.25 (dd,  $J = 7.7, 1.8$  Hz, 1H), 7.14 – 6.69 (m, 7H), 5.54 (d,  $J = 14.8$  Hz, 1H), 5.31 (d,  $J = 14.8$  Hz, 1H), 2.66 (s, 1H), 1.79 (td,  $J = 8.5, 4.2$  Hz, 1H), 1.72 (s, 3H), 1.17 (s, 9H), 0.94 – 0.86 (m, 2H), 0.57 (dt,  $J = 6.6, 4.7$  Hz, 2H).  $^{13}\text{C}$  NMR (101 MHz,  $\text{CDCl}_3$ )  $\delta$  153.4, 151.7, 144.8, 144.1, 143.0, 135.8, 132.41 131.5, 129.5, 129.4, 128.3, 128.0, 126.3, 124.8, 123.0, 122.4, 121.7, 110.5, 83.5, 78.3, 54.0, 35.3, 30.7, 17.3, 15.1, 9.4. HRMS (ESI)  $m/z$  calcd for  $\text{C}_{31}\text{H}_{31}\text{ClN}_3\text{O}$   $[\text{M}+\text{H}]^+ = 496.2150$ , found = 496.2155; the ee value was > 99%,  $t_R$  (minor) = 14.9 min,  $t_R$  (major) = 17.8 min (Chiralpak IC,  $\lambda = 254$  nm, 10% *i*-PrOH/Hexane, flow rate = 1.0 mL/min).

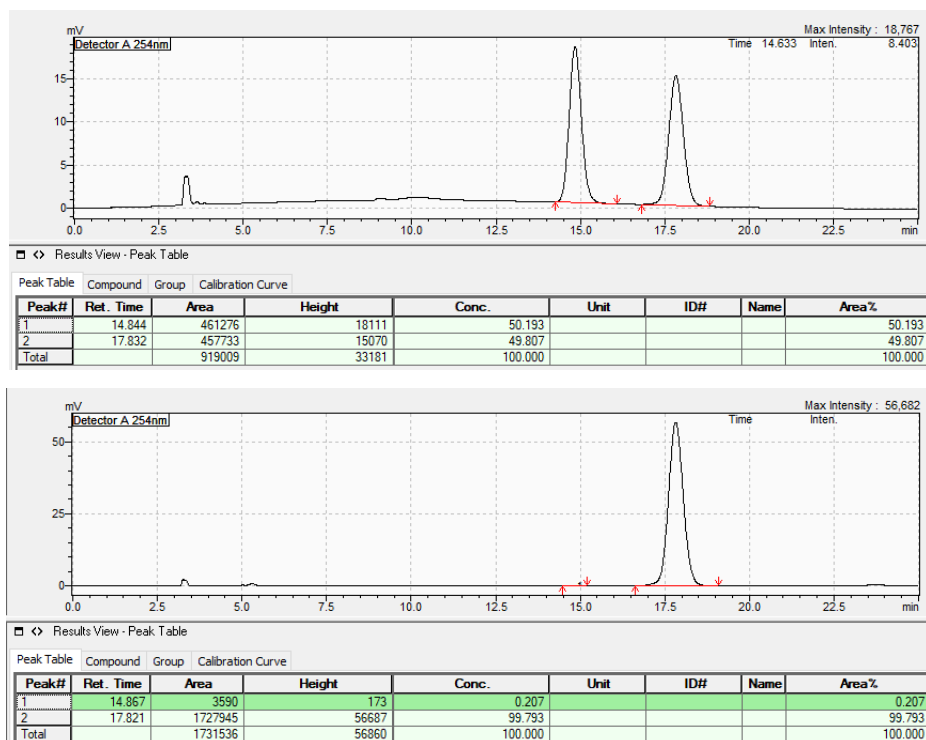

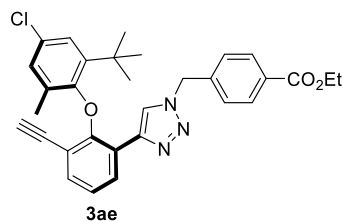

**Ethyl 4-((4-(2-(2-(*tert*-butyl)-4-chloro-6-methylphenoxy)-3-ethynylphenyl)-1*H*-1,2,3-triazol-1-yl)methyl)benzoate (3ae)**

71% yield;  $[\alpha]_D^{25} = -81.9$  (c 0.5,  $\text{CHCl}_3$ ), a white foam,  $R_f = 0.23$  (hexane/ethyl acetate 8:1).  $^1\text{H}$  NMR (400 MHz,  $\text{CDCl}_3$ )  $\delta$  8.41 (dd,  $J = 7.8, 1.8$  Hz, 1H), 8.05 – 7.87 (m, 3H), 7.34 – 7.18 (m, 4H), 7.13 – 6.95 (m, 2H), 6.87 (d,  $J = 2.6$  Hz, 1H), 5.65 (d,  $J = 15.3$  Hz, 1H), 5.45 (d,  $J = 15.3$  Hz, 1H), 4.30 (q,  $J = 7.1$  Hz, 2H), 2.67 (s, 1H), 1.73 (s, 3H), 1.32 (d,  $J = 7.2$  Hz, 3H), 1.18 (s, 9H).  $^{13}\text{C}$  NMR (101 MHz,  $\text{CDCl}_3$ )  $\delta$  165.9, 153.4, 151.6, 144.1, 139.2, 136.0, 132.4, 130.9, 130.3, 129.7, 129.4, 128.3, 127.6, 124.9, 122.5, 121.4, 110.5, 83.6, 78.2, 61.2, 53.7, 35.3, 30.7, 17.3, 14.3. HRMS (ESI)  $m/z$  calcd for  $\text{C}_{31}\text{H}_{31}\text{ClN}_3\text{O}_3$   $[\text{M}+\text{H}]^+ = 528.2048$ , found = 528.2053; the ee value was > 99%,  $t_R$  (minor) = 25.1 min,  $t_R$  (major) = 31.4 min (Chiralpak IC,  $\lambda = 254$  nm, 10% *i*-PrOH/Hexane, flow rate = 1.0 mL/min).

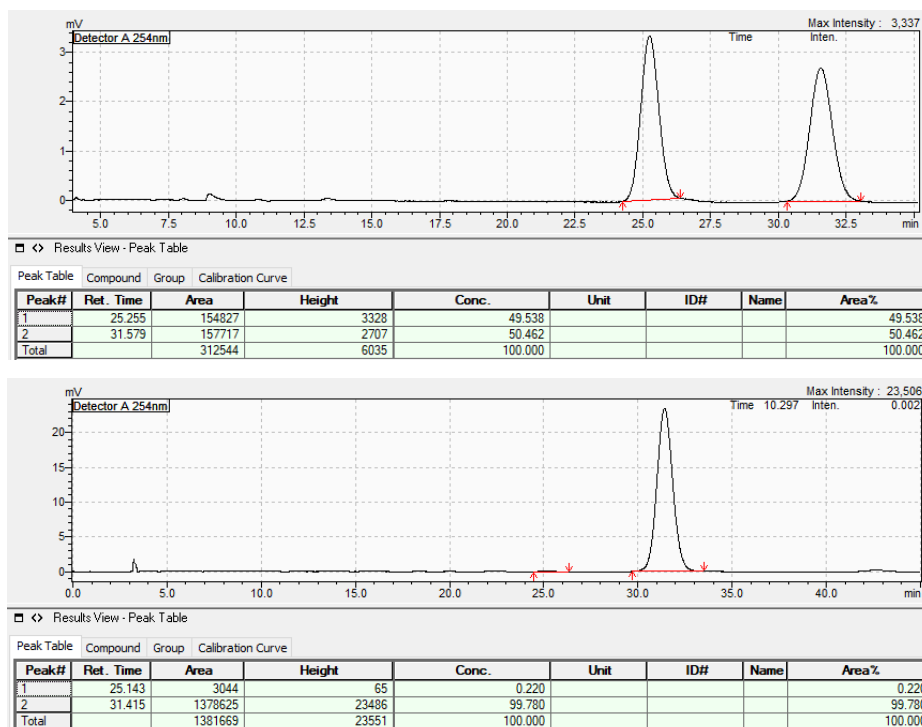

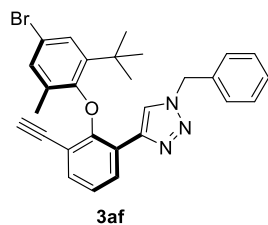

**1-Benzyl-4-(2-(4-bromo-2-(*tert*-butyl)-6-methylphenoxy)-3-ethynylphenyl)-1H-1,2,3-triazole (3af)**

76% yield;  $[\alpha]_D^{25} = -64.0$  (c 0.5,  $\text{CHCl}_3$ ), a white foam,  $R_f = 0.32$  (hexane/ethyl acetate 8:1).  $^1\text{H}$  NMR (400 MHz,  $\text{CDCl}_3$ )  $\delta$  8.41 (dd,  $J = 7.8, 1.8$  Hz, 1H), 7.87 (s, 1H), 7.32 – 7.15 (m, 7H), 7.09 – 6.92 (m, 2H), 5.60 (d,  $J = 14.9$  Hz, 1H), 5.36 (d,  $J = 14.8$  Hz, 1H), 2.67 (s, 1H), 1.72 (s, 3H), 1.17 (s, 9H).  $^{13}\text{C}$  NMR (101 MHz,  $\text{CDCl}_3$ )  $\delta$  153.3, 152.3, 144.5, 143.1, 135.8, 134.7, 132.9, 131.3, 129.4, 129.1, 128.7, 127.9, 127.8, 123.1, 122.5, 121.7, 117.5, 110.5, 83.5, 78.2, 54.2, 35.3, 30.7, 17.2. HRMS (ESI)  $m/z$  calcd for  $\text{C}_{28}\text{H}_{27}\text{BrN}_3\text{O}$   $[\text{M}+\text{H}]^+ = 500.1332$ , found = 500.1336; the ee value was 97%,  $t_R$  (minor) = 12.3 min,  $t_R$  (major) = 15.2 min (Chiralpak IC,  $\lambda = 254$  nm, 10% *i*-PrOH/Hexane, flow rate = 1.0 mL/min).

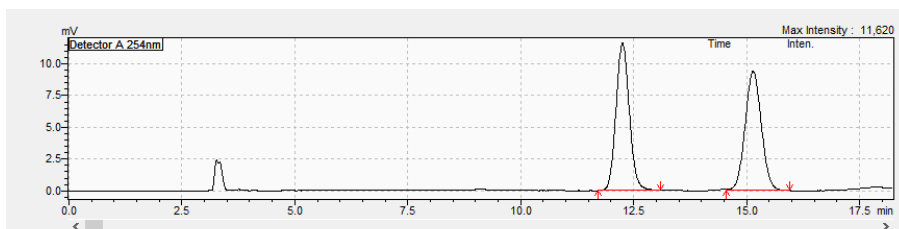

Results View - Peak Table

| Peak# | Ret. Time | Area   | Height | Conc.   | Unit | ID# | Name | Area%   |
|-------|-----------|--------|--------|---------|------|-----|------|---------|
| 1     | 12.252    | 238295 | 11590  | 50.344  |      |     |      | 50.344  |
| 2     | 15.144    | 235040 | 9392   | 49.656  |      |     |      | 49.656  |
| Total |           | 473335 | 20983  | 100.000 |      |     |      | 100.000 |

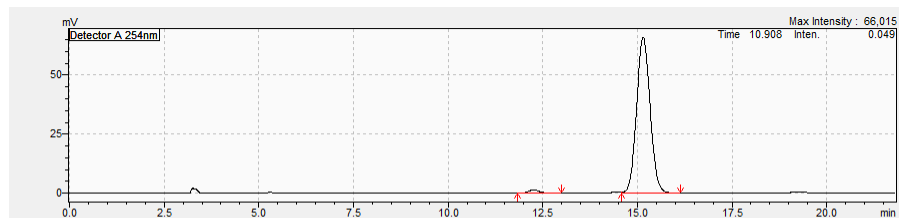

Results View - Peak Table

| Peak# | Ret. Time | Area    | Height | Mark | Conc.   | Unit | ID# | Name | Area%   |
|-------|-----------|---------|--------|------|---------|------|-----|------|---------|
| 1     | 12.260    | 27306   | 1316   |      | 1.633   |      |     |      | 1.633   |
| 2     | 15.153    | 1645013 | 65959  |      | 98.367  |      |     |      | 98.367  |
| Total |           | 1672319 | 67275  |      | 100.000 |      |     |      | 100.000 |

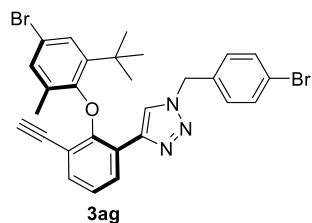

**4-(2-(4-Bromo-2-(*tert*-butyl)-6-methylphenoxy)-3-ethynylphenyl)-1-(4-bromobenzyl)-1*H*-1,2,3-triazole (3ag)**

74% yield;  $[\alpha]_D^{25} = -94.5$  (c 0.5,  $\text{CHCl}_3$ ), a white foam,  $R_f = 0.34$  (hexane/ethyl acetate 8:1).  $^1\text{H}$  NMR (400 MHz,  $\text{CDCl}_3$ )  $\delta$  8.40 (dd,  $J = 7.8, 1.8$  Hz, 1H), 7.87 (s, 1H), 7.44 – 7.34 (m, 2H), 7.32 – 7.26 (m, 1H), 7.22 (s, 1H), 7.03 (td,  $J = 8.0, 5.0$  Hz, 4H), 5.55 (d,  $J = 15.0$  Hz, 1H), 5.32 (d,  $J = 15.1$  Hz, 1H), 2.67 (s, 1H), 1.73 (s, 3H), 1.18 (s, 9H).  $^{13}\text{C}$  NMR (101 MHz,  $\text{CDCl}_3$ )  $\delta$  153.3, 152.2, 144.4, 143.32 135.9, 133.7, 132.8, 132.3, 131.4, 129.5, 129.4, 127.9, 123.0, 122.9, 122.5, 121.5, 117.6, 110.5, 83.6, 78.2, 53.5, 35.3, 30.7, 17.2. HRMS (ESI)  $m/z$  calcd for  $\text{C}_{28}\text{H}_{26}\text{Br}_2\text{N}_3\text{O}$   $[\text{M}+\text{H}]^+ = 578.0437$ , found = 578.0438; the ee value was 94%,  $t_R$  (minor) = 11.8 min,  $t_R$  (major) = 14.8 min (Chiralpak IC,  $\lambda = 254$  nm, 10% *i*-PrOH/Hexane, flow rate = 1.0 mL/min).

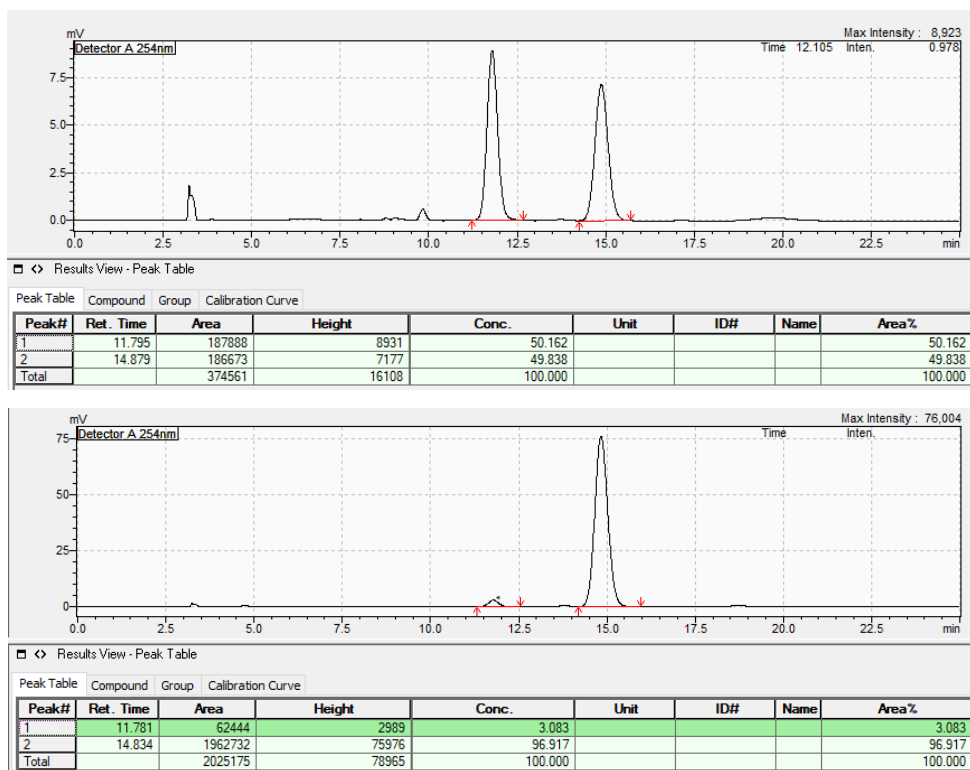

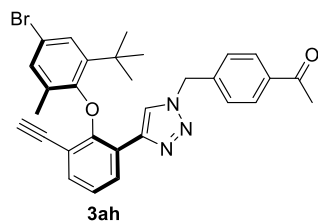

**1-(4-((4-(2-(4-Bromo-2-(*tert*-butyl)-6-methylphenoxy)-3-ethynylphenyl)-1*H*-1,2,3-triazol-1-yl)methyl)phenyl)ethan-1-one (3ah)**

82% yield;  $[\alpha]_D^{25} = -82.5$  (c 0.5, CHCl<sub>3</sub>), a white foam,  $R_f = 0.30$  (hexane/ethyl acetate 8:1). <sup>1</sup>H NMR (400 MHz, CDCl<sub>3</sub>)  $\delta$  8.41 (d,  $J = 7.8$  Hz, 1H), 7.91 (s, 1H), 7.84 (d,  $J = 8.3$  Hz, 2H), 7.33 – 7.18 (m, 4H), 7.11 – 6.96 (m, 2H), 5.65 (d,  $J = 15.3$  Hz, 1H), 5.45 (d,  $J = 15.3$  Hz, 1H), 2.68 (s, 1H), 2.51 (s, 3H), 1.73 (s, 3H), 1.17 (s, 9H). <sup>13</sup>C NMR (101 MHz, CDCl<sub>3</sub>)  $\delta$  197.3, 153.3, 152.2, 144.4, 143.4, 139.7, 137.2, 136.0, 132.9, 131.4, 129.4, 129.1, 127.9, 123.2, 122.5, 121.4, 117.6, 83.7, 78.1, 53.7, 35.3, 30.7, 26.7, 17.2. HRMS (ESI)  $m/z$  calcd for C<sub>30</sub>H<sub>29</sub>BrN<sub>3</sub>O<sub>2</sub> [M+H]<sup>+</sup> = 542.1438, found = 542.1440; the ee value was 91%,  $t_R$  (minor) = 14.2 min,  $t_R$  (major) = 15.9 min (Chiralpak IC,  $\lambda = 254$  nm, 30% *i*-PrOH/Hexane, flow rate = 1.0 mL/min).

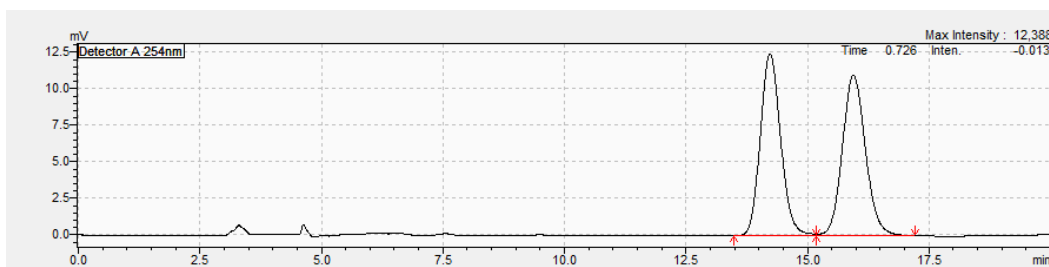

Results View - Peak Table

| Peak# | Ret. Time | Area   | Height | Mark | Conc.   | Unit | ID# | Name | Area%   |
|-------|-----------|--------|--------|------|---------|------|-----|------|---------|
| 1     | 14.231    | 364575 | 12460  |      | 49.899  |      |     |      | 49.899  |
| 2     | 15.947    | 366048 | 11008  | V    | 50.101  |      |     |      | 50.101  |
| Total |           | 730623 | 23468  |      | 100.000 |      |     |      | 100.000 |

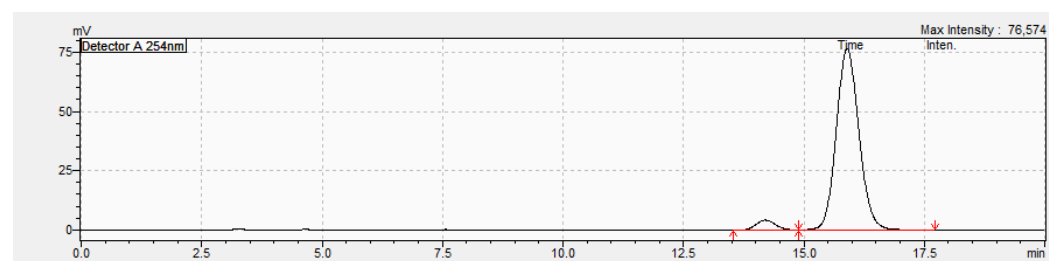

Results View - Peak Table

| Peak# | Ret. Time | Area    | Height | Mark | Conc.   | Unit | ID# | Name | Area%   |
|-------|-----------|---------|--------|------|---------|------|-----|------|---------|
| 1     | 14.203    | 119648  | 4220   | M    | 4.547   |      |     |      | 4.547   |
| 2     | 15.898    | 2511845 | 76612  | M    | 95.453  |      |     |      | 95.453  |
| Total |           | 2631494 | 80832  |      | 100.000 |      |     |      | 100.000 |

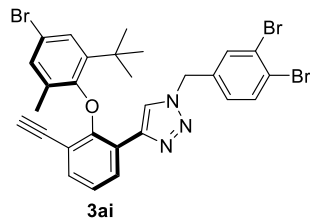

#### 4-(2-(4-Bromo-2-(*tert*-butyl)-6-methylphenoxy)-3-ethynylphenyl)-1-(3,4-dibromobenzyl)-1*H*-1,2,3-triazole (3ai)

69% yield;  $[\alpha]_D^{25} = -80.1$  (c 0.5, CHCl<sub>3</sub>), a white foam,  $R_f = 0.36$  (hexane/ethyl acetate 8:1). <sup>1</sup>H NMR (400 MHz, CDCl<sub>3</sub>)  $\delta$  8.40 (dd,  $J = 7.8, 1.8$  Hz, 1H), 7.90 (s, 1H), 7.50 (d,  $J = 8.2$  Hz, 1H), 7.44 (d,  $J = 2.1$  Hz, 1H), 7.28 (dd,  $J = 7.7, 1.7$  Hz, 1H), 7.23 (d,  $J = 2.5$  Hz, 1H), 7.09 – 7.01 (m, 2H), 6.97 (dd,  $J = 8.2, 2.1$  Hz, 1H), 5.53 (d,  $J = 15.2$  Hz, 1H), 5.31 (d,  $J = 15.2$  Hz, 1H), 2.68 (s, 1H), 1.74 (s, 3H), 1.20 (s, 9H). <sup>13</sup>C NMR (101 MHz, CDCl<sub>3</sub>)  $\delta$  153.3, 152.2, 144.4, 136.0, 135.6, 134.3, 132.9, 132.9, 131.4, 129.4, 127.9, 127.8, 125.6, 125.4, 123.0, 122.5, 121.3, 117.6, 110.5, 83.7, 78.1, 52.8, 35.3, 30.7, 17.2. HRMS (ESI)  $m/z$  calcd for C<sub>28</sub>H<sub>25</sub>Br<sub>3</sub>N<sub>3</sub>O [M+H]<sup>+</sup> = 655.9542, found = 655.9541; the ee value was > 99%,  $t_R$  (minor) = 12.4 min,  $t_R$  (major) = 17.2 min (Chiralpak IC,  $\lambda = 254$  nm, 10% *i*-PrOH/Hexane, flow rate = 1.0 mL/min).

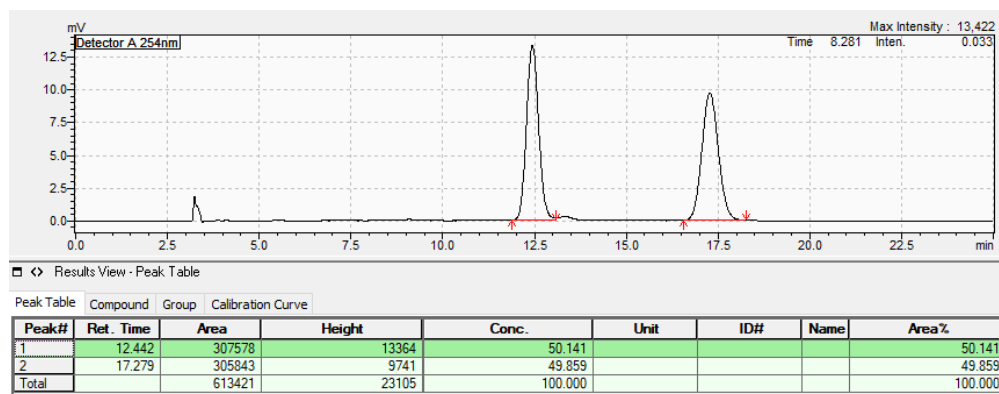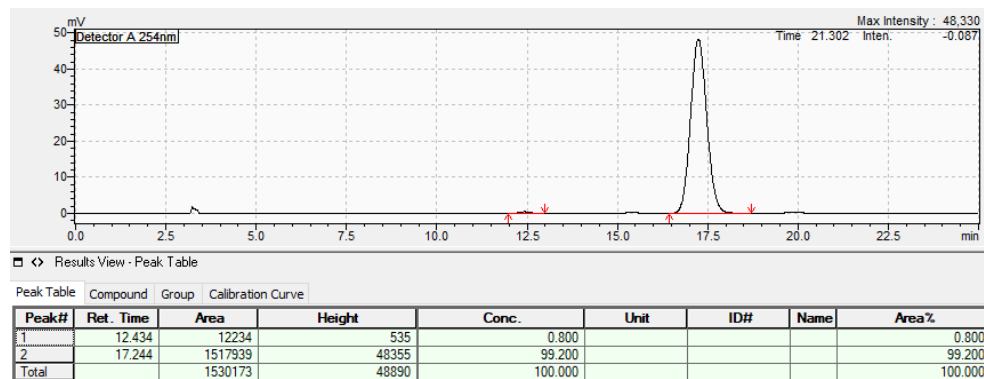

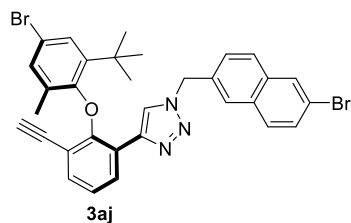

**4-(2-(4-Bromo-2-(*tert*-butyl)-6-methylphenoxy)-3-ethynylphenyl)-1-((6-bromonaphthalen-2-yl)methyl)-1H-1,2,3-triazole (3aj)**

82% yield;  $[\alpha]_D^{25} = -60.4$  (c 0.5,  $\text{CHCl}_3$ ), a white foam,  $R_f = 0.31$  (hexane/ethyl acetate 8:1).  $^1\text{H}$  NMR (400 MHz,  $\text{CDCl}_3$ )  $\delta$  8.41 (dd,  $J = 7.8, 1.8$  Hz, 1H), 7.97 – 7.86 (m, 2H), 7.68 – 7.47 (m, 4H), 7.27 (td,  $J = 8.1, 7.6, 1.8$  Hz, 2H), 7.23 – 7.13 (m, 2H), 7.10 – 6.94 (m, 2H), 5.73 (d,  $J = 15.1$  Hz, 1H), 5.52 (d,  $J = 15.0$  Hz, 1H), 2.66 (s, 1H), 1.71 (s, 3H), 1.09 (s, 9H).  $^{13}\text{C}$  NMR (101 MHz,  $\text{CDCl}_3$ )  $\delta$  153.3, 152.2, 144.4, 143.3, 135.9, 134.2, 132.8, 132.7, 131.6, 131.3, 130.1, 129.8, 129.5, 129.4, 128.2, 127.8, 127.0, 126.2, 123.2, 122.5, 121.6, 120.7, 117.5, 110.5, 83.6, 78.2, 54.2, 35.2, 30.7, 17.2. HRMS (ESI)  $m/z$  calcd for  $\text{C}_{32}\text{H}_{28}\text{Br}_2\text{N}_3\text{O}$   $[\text{M}+\text{H}]^+ = 628.0594$ , found = 628.0593; the ee value was 96%,  $t_R$  (minor) = 16.0 min,  $t_R$  (major) = 19.7 min (Chiralpak IC,  $\lambda = 254$  nm, 10% *i*-PrOH/Hexane, flow rate = 1.0 mL/min).

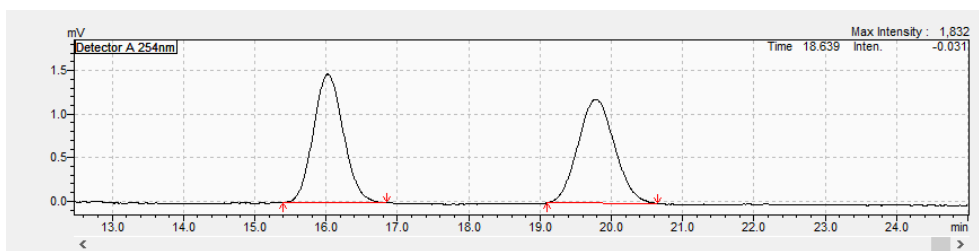

Results View - Peak Table

| Peak# | Ret. Time | Area  | Height | Conc.   | Unit | ID# | Name | Area%   |
|-------|-----------|-------|--------|---------|------|-----|------|---------|
| 1     | 16.023    | 43374 | 1478   | 50.487  |      |     |      | 50.487  |
| 2     | 19.787    | 42537 | 1191   | 49.513  |      |     |      | 49.513  |
| Total |           | 85911 | 2669   | 100.000 |      |     |      | 100.000 |

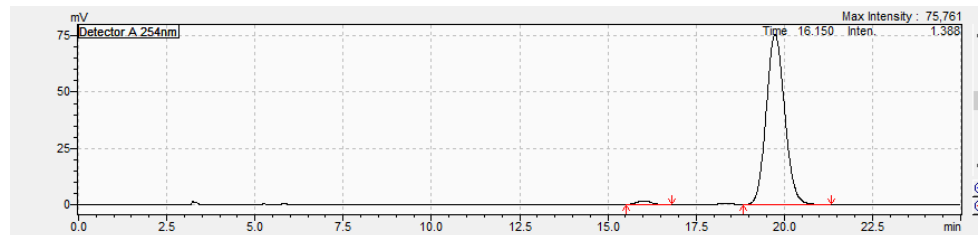

Results View - Peak Table

| Peak# | Ret. Time | Area    | Height | Conc.   | Unit | ID# | Name | Area%   |
|-------|-----------|---------|--------|---------|------|-----|------|---------|
| 1     | 16.010    | 51903   | 1763   | 1.850   |      |     |      | 1.850   |
| 2     | 19.740    | 2753266 | 75724  | 98.150  |      |     |      | 98.150  |
| Total |           | 2805168 | 77487  | 100.000 |      |     |      | 100.000 |



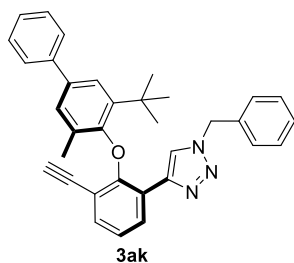

**1-Benzyl-4-(2-((3-(*tert*-butyl)-5-methyl-[1,1'-biphenyl]-4-yl)oxy)-3-ethynylphenyl)-1H-1,2,3-triazole (3ak)**

71% yield;  $[\alpha]_D^{25} = -80.6$  (c 0.5,  $\text{CHCl}_3$ ), a white foam,  $R_f = 0.34$  (hexane/ethyl acetate 8:1).  $^1\text{H}$  NMR (400 MHz,  $\text{CDCl}_3$ )  $\delta$  8.44 (dd,  $J = 7.8, 1.8$  Hz, 1H), 8.00 (s, 1H), 7.56 – 7.46 (m, 2H), 7.41 – 7.33 (m, 3H), 7.32 – 7.24 (m, 4H), 7.14 – 6.95 (m, 3H), 5.62 (d,  $J = 14.9$  Hz, 1H), 5.37 (d,  $J = 15.0$  Hz, 1H), 2.57 (s, 1H), 1.83 (s, 3H), 1.24 (s, 9H).  $^{13}\text{C}$  NMR (101 MHz,  $\text{CDCl}_3$ )  $\delta$  152.8, 142.6, 137.6, 136.0, 134.6, 131.1, 129.3, 129.1, 128.8, 128.7, 127.9, 127.5, 127.1, 127.0, 123.7, 123.4, 122.2, 83.2, 78.3, 54.4, 35.2, 31.0, 17.6. HRMS (ESI)  $m/z$  calcd for  $\text{C}_{34}\text{H}_{32}\text{N}_3\text{O}$   $[\text{M}+\text{H}]^+ = 498.2540$ , found = 498.2541; the ee value was > 99%,  $t_R$  (minor) = 12.6 min,  $t_R$  (major) = 17.8 min (Chiralpak IC,  $\lambda = 254$  nm, 10% *i*-PrOH/Hexane, flow rate = 1.0 mL/min).

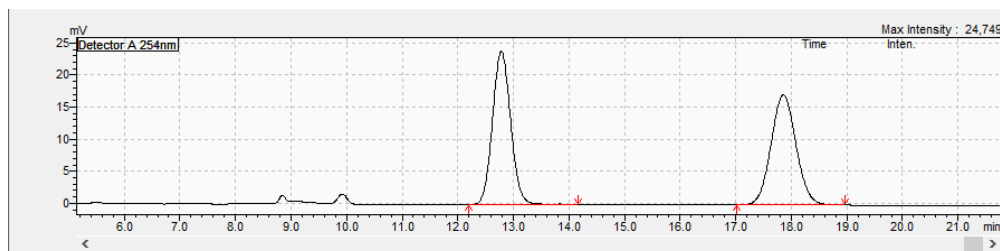

Results View - Peak Table

| Peak# | Ret. Time | Area    | Height | Mark | Conc.   | Unit | ID# | Name | Area%   |
|-------|-----------|---------|--------|------|---------|------|-----|------|---------|
| 1     | 12.783    | 545116  | 23925  | S    | 50.250  |      |     |      | 50.250  |
| 2     | 17.856    | 539689  | 17187  |      | 49.750  |      |     |      | 49.750  |
| Total |           | 1084805 | 41112  |      | 100.000 |      |     |      | 100.000 |

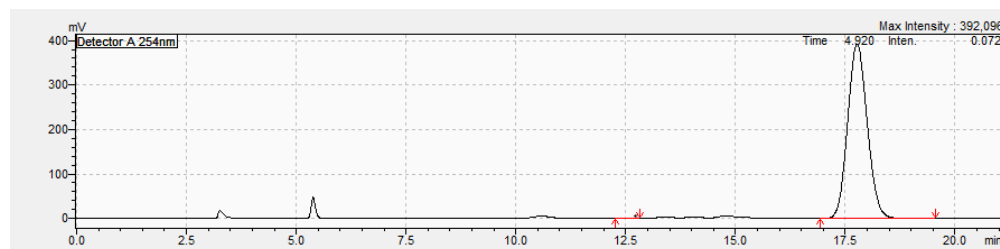

Results View - Peak Table

| Peak# | Ret. Time | Area     | Height | Mark | Conc.   | Unit | ID# | Name | Area%   |
|-------|-----------|----------|--------|------|---------|------|-----|------|---------|
| 1     | 12.617    | 8850     | 293    |      | 0.073   |      |     |      | 0.073   |
| 2     | 17.768    | 12154190 | 392048 |      | 99.927  |      |     |      | 99.927  |
| Total |           | 12163040 | 392341 |      | 100.000 |      |     |      | 100.000 |

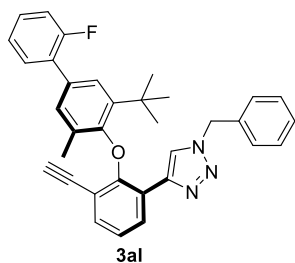

**1-Benzyl-4-(2-((3-(*tert*-butyl)-2'-fluoro-5-methyl-[1,1'-biphenyl]-4-yl)oxy)-3-ethynylphenyl)-1H-1,2,3-triazole (3al)**

61% yield;  $[\alpha]_D^{25} = -73.6$  (c 0.5,  $\text{CHCl}_3$ ), a white foam,  $R_f = 0.35$  (hexane/ethyl acetate 8:1).  $^1\text{H}$  NMR (400 MHz,  $\text{CDCl}_3$ )  $\delta$  8.43 (dd,  $J = 7.8, 1.8$  Hz, 1H), 7.99 (s, 1H), 7.36 (dd,  $J = 7.7, 1.8$  Hz, 1H), 7.33 – 7.23 (m, 5H), 7.17 – 6.83 (m, 5H), 5.61 (d,  $J = 15.0$  Hz, 1H), 5.37 (d,  $J = 15.0$  Hz, 1H), 2.62 (s, 1H), 1.82 (s, 3H), 1.23 (s, 9H).  $^{13}\text{C}$  NMR (101 MHz,  $\text{CDCl}_3$ )  $\delta$  161.0, 153.8, 142.3, 135.8, 134.7, 132.2, 130.9, 130.7, 130.7, 129.3, 129.2, 129.1, 128.8, 128.7, 128.6, 127.9, 125.7, 124.3, 124.3, 123.3, 122.2, 121.6, 116.2, 116.0, 110.6, 83.1, 78.3, 54.2, 35.2, 31.0, 17.4. HRMS (ESI)  $m/z$  calcd for  $\text{C}_{34}\text{H}_{31}\text{FN}_3\text{O}$   $[\text{M}+\text{H}]^+ = 516.2446$ , found = 516.2450; the ee value was > 99%,  $t_R$  (minor) = 10.8 min,  $t_R$  (major) = 14.6 min (Chiralpak IC,  $\lambda = 254$  nm, 10% *i*-PrOH/Hexane, flow rate = 1.0 mL/min).

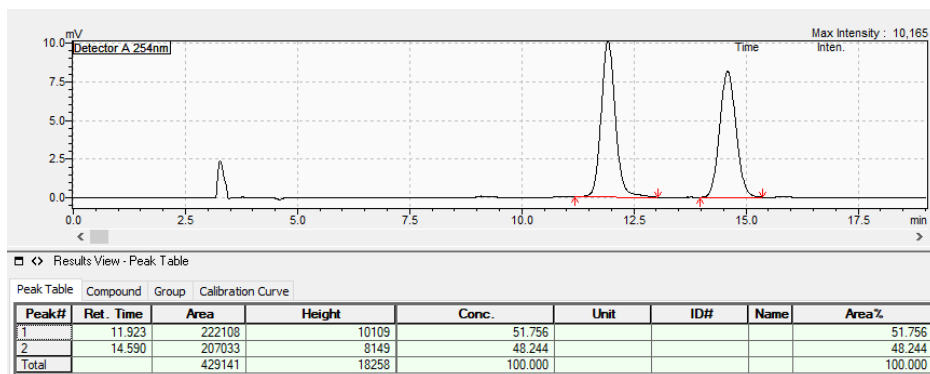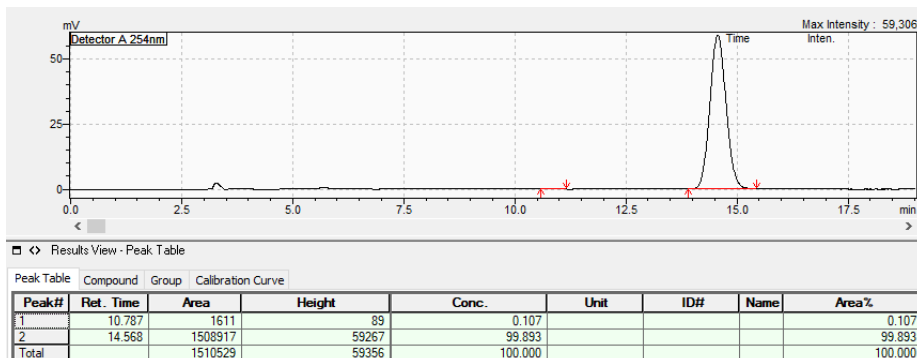

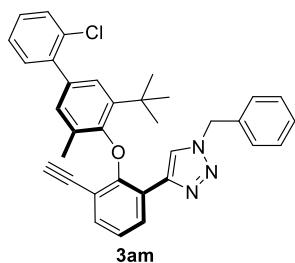

**1-Benzyl-4-(2-((3-(tert-butyl)-2'-chloro-5-methyl-[1,1'-biphenyl]-4-yl)oxy)-3-ethynylphenyl)-1H-1,2,3-triazole (3am)**

79% yield;  $[\alpha]_D^{25} = -83.7$  (c 0.5,  $\text{CHCl}_3$ ), a white foam,  $R_f = 0.31$  (hexane/ethyl acetate 8:1).  $^1\text{H}$  NMR (400 MHz,  $\text{CDCl}_3$ )  $\delta$  8.43 (dd,  $J = 7.8, 1.8$  Hz, 1H), 8.02 (s, 1H), 7.47 – 7.39 (m, 1H), 7.31 – 7.16 (m, 10H), 7.02 (t,  $J = 7.7$  Hz, 1H), 6.95 (d,  $J = 2.2$  Hz, 1H), 5.62 (d,  $J = 15.0$  Hz, 1H), 5.38 (d,  $J = 15.0$  Hz, 1H), 2.69 (s, 1H), 1.82 (s, 3H), 1.23 (s, 9H).  $^{13}\text{C}$  NMR (101 MHz,  $\text{CDCl}_3$ )  $\delta$  153.8, 152.7, 143.3, 141.9, 140.5, 135.8, 135.7, 134.8, 131.4, 130.6, 130.0, 129.6, 129.2, 129.1, 128.6, 128.4, 127.8, 126.9, 126.2, 123.3, 122.2, 121.6, 110.5, 83.4, 78.3, 54.2, 35.2, 31.0, 17.4. HRMS (ESI)  $m/z$  calcd for  $\text{C}_{34}\text{H}_{31}\text{ClN}_3\text{O}$   $[\text{M}+\text{H}]^+ = 532.2150$ , found = 532.2152; the ee value was 97%,  $t_R$  (minor) = 12.1 min,  $t_R$  (major) = 13.8 min (Chiralpak IC,  $\lambda = 254$  nm, 10% *i*-PrOH/Hexane, flow rate = 1.0 mL/min).

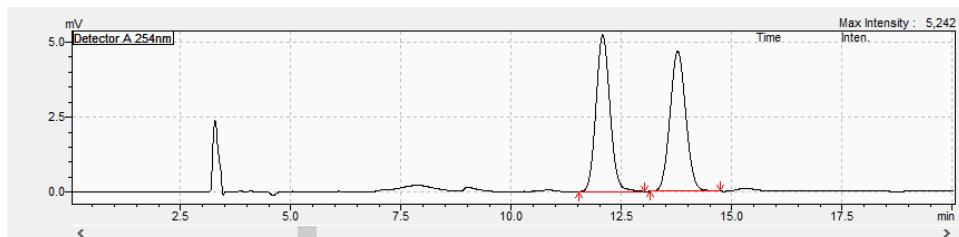

Results View - Peak Table

| Peak# | Ret. Time | Area   | Height | Conc.   | Unit | ID# | Name | Area%   |
|-------|-----------|--------|--------|---------|------|-----|------|---------|
| 1     | 12.070    | 114289 | 5220   | 49.761  |      |     |      | 49.761  |
| 2     | 13.769    | 115387 | 4664   | 50.239  |      |     |      | 50.239  |
| Total |           | 229676 | 9884   | 100.000 |      |     |      | 100.000 |

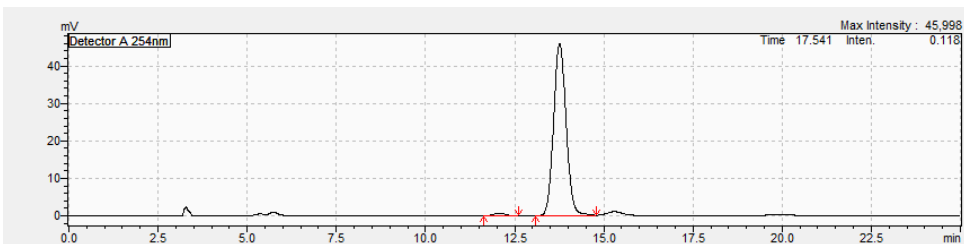

Results View - Peak Table

| Peak# | Ret. Time | Area    | Height | Conc.   | Unit | ID# | Name | Area%   |
|-------|-----------|---------|--------|---------|------|-----|------|---------|
| 1     | 12.065    | 15300   | 728    | 1.341   |      |     |      | 1.341   |
| 2     | 13.763    | 1125696 | 45943  | 98.659  |      |     |      | 98.659  |
| Total |           | 1140996 | 46671  | 100.000 |      |     |      | 100.000 |

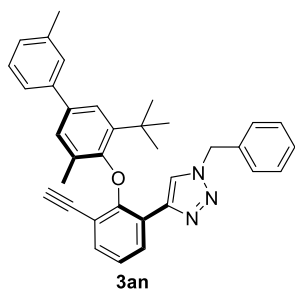

3an

**1-Benzyl-4-(2-((3-(tert-butyl)-3',5-dimethyl-[1,1'-biphenyl]-4-yl)oxy)-3-ethynylphenyl)-1H-1,2,3-triazole (3an)**

73% yield;  $[\alpha]_D^{25} = -83.1$  (c 0.5,  $\text{CHCl}_3$ ), a white foam,  $R_f = 0.35$  (hexane/ethyl acetate 8:1).  $^1\text{H}$  NMR (400 MHz,  $\text{CDCl}_3$ )  $\delta$  8.43 (dd,  $J = 7.9, 1.8$  Hz, 1H), 7.99 (s, 1H), 7.34 – 7.23 (m, 6H), 7.17 (dd,  $J = 4.8, 1.9$  Hz, 1H), 7.13 – 6.99 (m, 3H), 5.61 (d,  $J = 15.0$  Hz, 1H), 5.37 (d,  $J = 15.0$  Hz, 1H), 2.57 (s, 1H), 2.36 (s, 3H), 1.83 (s, 3H), 1.24 (s, 9H).  $^{13}\text{C}$  NMR (101 MHz,  $\text{CDCl}_3$ )  $\delta$  153.9, 142.5, 141.2, 138.4, 137.7, 135.8, 134.8, 131.0, 129.2, 129.1, 128.7, 128.6, 127.9, 127.8, 127.5, 124.1, 123.6, 123.3, 122.2, 121.6, 83.1, 54.2, 35.2, 31.0, 21.6, 17.5. HRMS (ESI)  $m/z$  calcd for  $\text{C}_{35}\text{H}_{34}\text{N}_3\text{O}$   $[\text{M}+\text{H}]^+ = 512.2696$ , found = 512.2704; the ee value was  $> 99\%$ ,  $t_R$  (minor) = 11.5 min,  $t_R$  (major) = 16.5 min (Chiralpak IC,  $\lambda = 254$  nm, 10% *i*-PrOH/Hexane, flow rate = 1.0 mL/min).

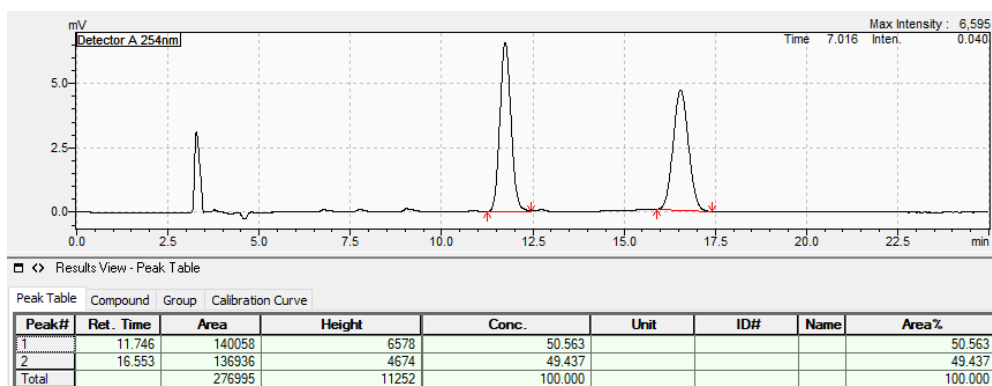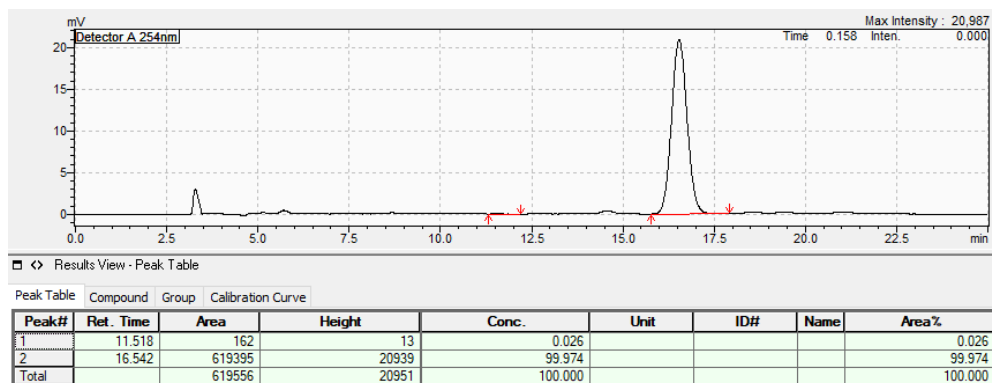

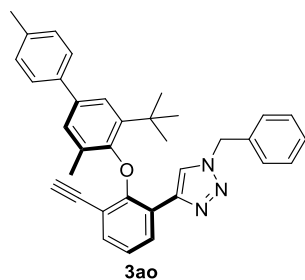

**1-Benzyl-4-(2-((3-(*tert*-butyl)-4',5-dimethyl-[1,1'-biphenyl]-4-yl)oxy)-3-ethynylphenyl)-1H-1,2,3-triazole (3ao)**

67% yield;  $[\alpha]_D^{25} = -78.1$  (c 0.5,  $\text{CHCl}_3$ ), a white foam,  $R_f = 0.33$  (hexane/ethyl acetate 8:1).  $^1\text{H}$  NMR (400 MHz,  $\text{CDCl}_3$ )  $\delta$  8.43 (dd,  $J = 7.8, 1.8$  Hz, 1H), 7.99 (s, 1H), 7.48 – 7.39 (m, 2H), 7.32 (d,  $J = 2.3$  Hz, 1H), 7.26 (dd,  $J = 7.8, 1.7$  Hz, 2H), 7.16 – 6.92 (m, 2H), 5.61 (d,  $J = 15.0$  Hz, 1H), 5.37 (d,  $J = 15.0$  Hz, 1H), 2.56 (s, 1H), 2.33 (s, 3H), 1.82 (s, 3H), 1.24 (s, 9H).  $^{13}\text{C}$  NMR (101 MHz,  $\text{CDCl}_3$ )  $\delta$  153.9, 152.6, 142.5, 137.5, 135.8, 134.8, 131.1, 129.5, 129.2, 129.1, 128.6, 127.9, 127.2, 126.9, 123.5, 123.3, 122.1, 121.6, 110.6, 83.1, 78.4, 54.2, 35.2, 31.0, 21.1, 17.5. HRMS (ESI)  $m/z$  calcd for  $\text{C}_{35}\text{H}_{34}\text{N}_3\text{O}$   $[\text{M}+\text{H}]^+ = 512.2696$ , found = 512.2701; the ee value was > 99%,  $t_R$  (minor) = 12.8 min,  $t_R$  (major) = 16.4 min (Chiralpak IC,  $\lambda = 254$  nm, 10% *i*-PrOH/Hexane, flow rate = 1.0 mL/min).

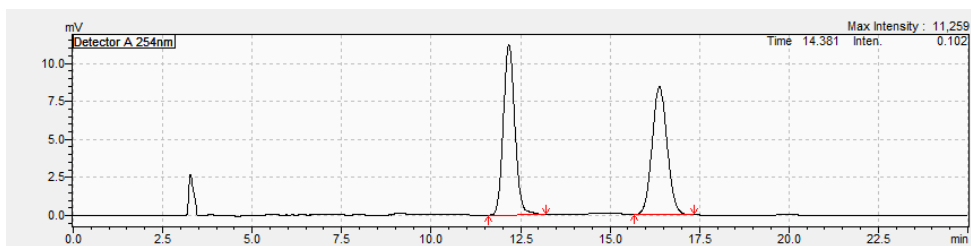

Results View - Peak Table

Peak Table Compound Group Calibration Curve

| Peak# | Ret. Time | Area   | Height | Conc.   | Unit | ID# | Name | Area%   |
|-------|-----------|--------|--------|---------|------|-----|------|---------|
| 1     | 12.174    | 250966 | 11218  | 50.401  |      |     |      | 50.401  |
| 2     | 16.383    | 246973 | 8399   | 49.599  |      |     |      | 49.599  |
| Total |           | 497940 | 19616  | 100.000 |      |     |      | 100.000 |

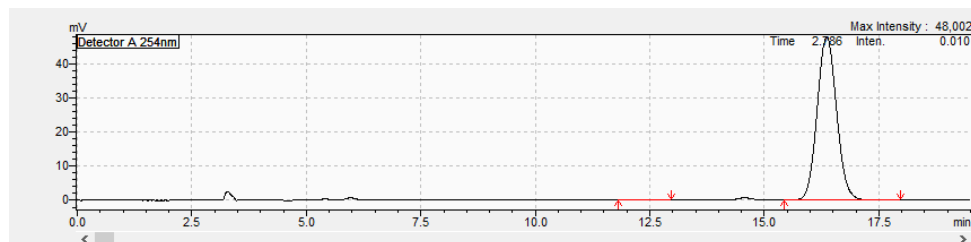

Results View - Peak Table

Peak Table Compound Group Calibration Curve

| Peak# | Ret. Time | Area    | Height | Conc.   | Unit | ID# | Name | Area%   |
|-------|-----------|---------|--------|---------|------|-----|------|---------|
| 1     | 12.770    | 436     | 16     | 0.031   |      |     |      | 0.031   |
| 2     | 16.360    | 1412679 | 47960  | 99.969  |      |     |      | 99.969  |
| Total |           | 1413115 | 47975  | 100.000 |      |     |      | 100.000 |

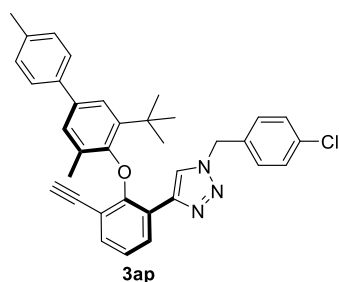

3ap

**4-(2-((3-(*tert*-Butyl)-4',5-dimethyl-[1,1'-biphenyl]-4-yl)oxy)-3-ethynylphenyl)-1-(4-chlorobenzyl)-1H-1,2,3-triazole (3ap)**

63% yield;  $[\alpha]_D^{25} = -79.6$  (c 0.5,  $\text{CHCl}_3$ ), a white foam,  $R_f = 0.33$  (hexane/ethyl acetate 8:1).  $^1\text{H}$  NMR (400 MHz,  $\text{CDCl}_3$ )  $\delta$  8.42 (dd,  $J = 7.9, 1.8$  Hz, 1H), 7.98 (s, 1H), 7.49 – 7.40 (m, 2H), 7.37 – 7.24 (m, 3H), 7.20 – 6.96 (m, 8H), 5.57 (d,  $J = 15.1$  Hz, 1H), 5.34 (d,  $J = 15.1$  Hz, 1H), 2.57 (s, 1H), 2.33 (s, 3H), 1.83 (s, 3H), 1.25 (s, 9H).  $^{13}\text{C}$  NMR (101 MHz,  $\text{CDCl}_3$ )  $\delta$  153.9, 152.5, 142.5, 138.3, 136.9, 135.9, 133.3, 131.0, 129.5, 129.3, 129.2, 127.2, 126.9, 123.5, 123.2, 122.2, 110.6, 83.2, 78.3, 53.5, 35.2, 31.0, 21.1, 17.5. HRMS (ESI)  $m/z$  calcd for  $\text{C}_{35}\text{H}_{33}\text{ClN}_3\text{O}$   $[\text{M}+\text{H}]^+ = 546.2307$ , found = 546.2308; the ee value was > 99%,  $t_R$  (minor) = 10.9 min,  $t_R$  (major) = 15.1 min (Chiralpak IC,  $\lambda = 254$  nm, 10% *i*-PrOH/Hexane, flow rate = 1.0 mL/min).

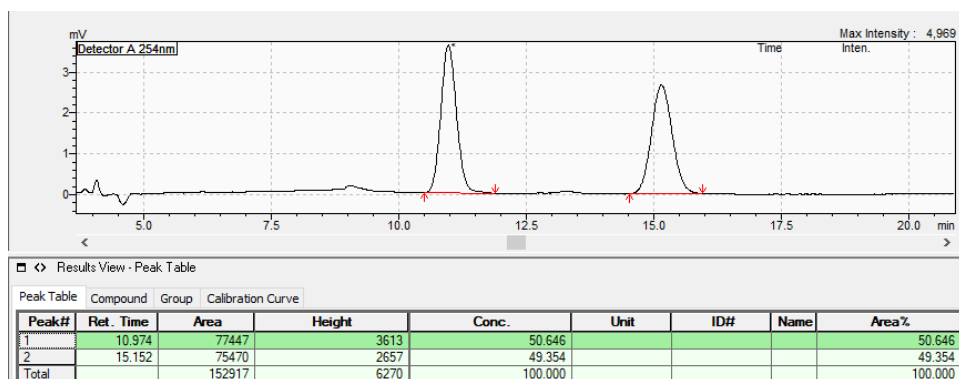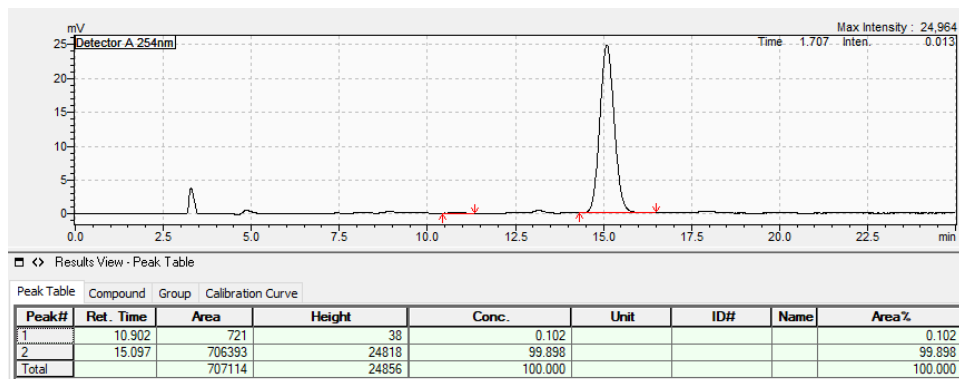

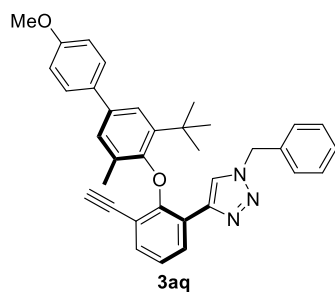

**1-Benzyl-4-(2-((3-(*tert*-butyl)-4'-methoxy-5-methyl-[1,1'-biphenyl]-4-yl)oxy)-3-ethynylphenyl)-1*H*-1,2,3-triazole (3aq)**

76% yield;  $[\alpha]_D^{25} = -79.2$  (c 0.5,  $\text{CHCl}_3$ ), a white foam,  $R_f = 0.23$  (hexane/ethyl acetate 8:1).  $^1\text{H}$  NMR (400 MHz,  $\text{CDCl}_3$ )  $\delta$  8.43 (d,  $J = 9.6$  Hz, 1H), 7.99 (s, 1H), 7.44 (d,  $J = 8.7$  Hz, 2H), 7.34 – 7.24 (m, 4H), 7.18 – 7.15 (m, 1H), 7.06 (d,  $J = 2.3$  Hz, 1H), 7.02 (t,  $J = 7.7$  Hz, 1H), 6.90 (d,  $J = 8.8$  Hz, 2H), 5.61 (d,  $J = 15.0$  Hz, 1H), 5.37 (d,  $J = 15.0$  Hz, 1H), 3.78 (s, 3H), 2.57 (s, 1H), 1.82 (s, 3H), 1.24 (s, 9H).  $^{13}\text{C}$  NMR (101 MHz,  $\text{CDCl}_3$ )  $\delta$  159.0, 153.9, 143.4, 142.5, 137.2, 135.8, 134.8, 133.8, 131.1, 129.2, 129.1, 128.6, 128.0, 127.9, 127.0, 123.3, 123.2, 122.1, 121.6, 114.2, 110.5, 83.1, 78.4, 55.4, 54.2, 35.2, 31.0, 17.5. HRMS (ESI)  $m/z$  calcd for  $\text{C}_{35}\text{H}_{34}\text{N}_3\text{O}_2$   $[\text{M}+\text{H}]^+ = 528.2646$ , found = 528.2655; the ee value was 99%,  $t_R$  (minor) = 20.4 min,  $t_R$  (major) = 31.4 min (Chiralpak IC,  $\lambda = 254$  nm, 10% *i*-PrOH/Hexane, flow rate = 1.0 mL/min).

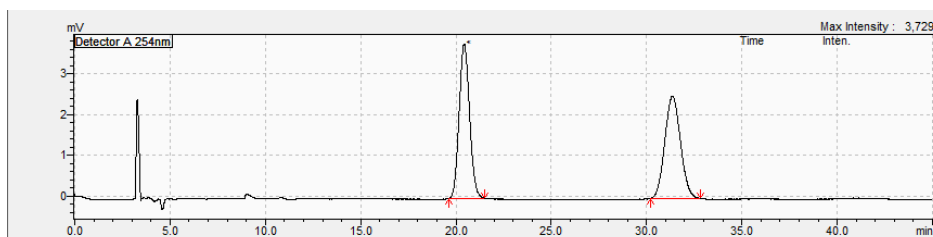

Results View - Peak Table

| Peak# | Ret. Time | Area   | Height | Conc.   | Unit | ID# | Name | Area%   |
|-------|-----------|--------|--------|---------|------|-----|------|---------|
| 1     | 20.431    | 144678 | 3783   | 50.135  |      |     |      | 50.135  |
| 2     | 31.355    | 143897 | 2505   | 49.865  |      |     |      | 49.865  |
| Total |           | 288575 | 6288   | 100.000 |      |     |      | 100.000 |

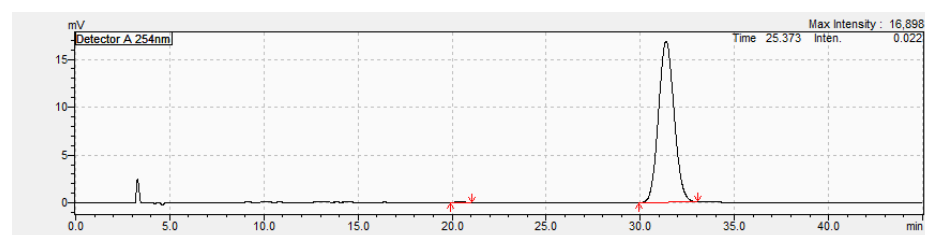

Results View - Peak Table

| Peak# | Ret. Time | Area   | Height | Conc.   | Unit | ID# | Name | Area%   |
|-------|-----------|--------|--------|---------|------|-----|------|---------|
| 1     | 20.386    | 3784   | 111    | 0.388   |      |     |      | 0.388   |
| 2     | 31.368    | 970823 | 16832  | 99.612  |      |     |      | 99.612  |
| Total |           | 974607 | 16943  | 100.000 |      |     |      | 100.000 |

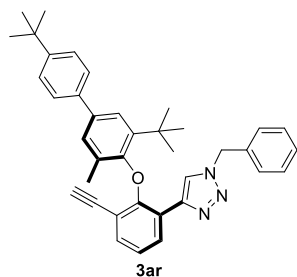

**1-Benzyl-4-(2-((3,4'-di-*tert*-butyl-5-methyl-[1,1'-biphenyl]-4-yl)oxy)-3-ethynylphenyl)-1H-1,2,3-triazole (3ar)**

64% yield;  $[\alpha]_D^{25} = -81.9$  (c 0.5,  $\text{CHCl}_3$ ), a white foam,  $R_f = 0.35$  (hexane/ethyl acetate 8:1).  $^1\text{H}$  NMR (400 MHz,  $\text{CDCl}_3$ )  $\delta$  8.43 (d,  $J = 7.8$  Hz, 1H), 8.00 (s, 1H), 7.46 (d,  $J = 8.4$  Hz, 2H), 7.39 (d,  $J = 8.4$  Hz, 2H), 7.33 (d,  $J = 2.3$  Hz, 1H), 7.25 (dd,  $J = 5.2, 1.9$  Hz, 4H), 7.17 (dd,  $J = 4.8, 1.8$  Hz, 1H), 7.10 (d,  $J = 2.3$  Hz, 1H), 7.01 (s, 1H), 5.61 (d,  $J = 15.0$  Hz, 1H), 5.37 (d,  $J = 15.0$  Hz, 1H), 2.55 (s, 1H), 1.82 (s, 3H), 1.30 (s, 9H), 1.24 (s, 9H).  $^{13}\text{C}$  NMR (101 MHz,  $\text{CDCl}_3$ )  $\delta$  153.9, 152.6, 143.3, 142.5, 138.4, 135.9, 134.7, 131.1, 129.2, 129.1, 128.6, 127.9, 127.3, 126.7, 125.7, 123.6, 123.3, 122.2, 121.5, 110.5, 83.1, 54.2, 35.2, 34.5, 31.4, 31.0, 17.5. HRMS (ESI)  $m/z$  calcd for  $\text{C}_{38}\text{H}_{40}\text{N}_3\text{O}$   $[\text{M}+\text{H}]^+ = 554.3166$ , found = 554.3170; the ee value was > 99%,  $t_R$  (minor) = 9.1 min,  $t_R$  (major) = 13.4 min (Chiralpak IC,  $\lambda = 254$  nm, 10% *i*-PrOH/Hexane, flow rate = 1.0 mL/min).

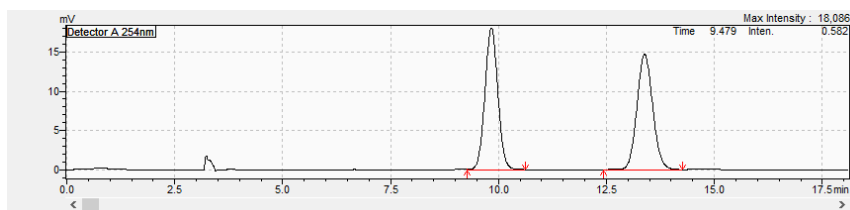

Results View - Peak Table

| Peak# | Ret. Time | Area   | Height | Conc.   | Unit | ID# | Name | Area%   |
|-------|-----------|--------|--------|---------|------|-----|------|---------|
| 1     | 9.836     | 375665 | 18083  | 50.028  |      |     |      | 50.028  |
| 2     | 13.385    | 375250 | 14732  | 49.972  |      |     |      | 49.972  |
| Total |           | 750916 | 32814  | 100.000 |      |     |      | 100.000 |

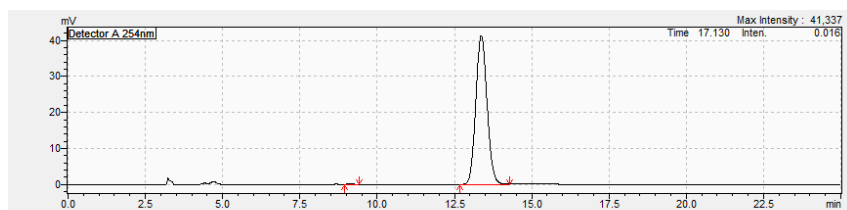

Results View - Peak Table

| Peak# | Ret. Time | Area    | Height | Conc.   | Unit | ID# | Name | Area%   |
|-------|-----------|---------|--------|---------|------|-----|------|---------|
| 1     | 9.090     | 1148    | 75     | 0.109   |      |     |      | 0.109   |
| 2     | 13.367    | 1050117 | 41330  | 99.891  |      |     |      | 99.891  |
| Total |           | 1051265 | 41405  | 100.000 |      |     |      | 100.000 |



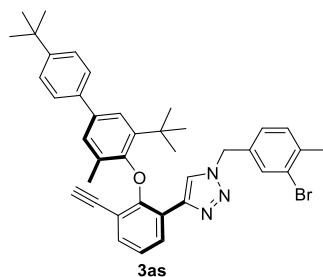

**1-(3-Bromo-4-methylbenzyl)-4-(2-((3,4'-di-*tert*-butyl-5-methyl-[1,1'-biphenyl]-4-yl)oxy)-3-ethynylphenyl)-1*H*-1,2,3-triazole (3as)**

63% yield;  $[\alpha]_D^{25} = -45.3$  (c 0.5,  $\text{CHCl}_3$ ), a white foam,  $R_f = 0.32$  (hexane/ethyl acetate 8:1).  $^1\text{H}$  NMR (400 MHz,  $\text{CDCl}_3$ )  $\delta$  8.43 (dd,  $J = 7.8, 1.8$  Hz, 1H), 7.99 (s, 1H), 7.54 – 7.26 (m, 7H), 7.14 – 6.79 (m, 4H), 5.52 (d,  $J = 15.0$  Hz, 1H), 5.29 (d,  $J = 15.0$  Hz, 1H), 2.56 (s, 1H), 2.27 (s, 3H), 1.83 (s, 3H), 1.30 (s, 9H), 1.25 (s, 9H).  $^{13}\text{C}$  NMR (101 MHz,  $\text{CDCl}_3$ )  $\delta$  153.9, 152.6, 150.1, 143.5, 142.5, 138.3, 135.9, 134.0, 133.0, 131.0, 130.2, 129.2, 127.3, 126.7, 126.7, 125.7, 123.6, 123.2, 122.2, 121.5, 83.2, 78.3, 53.5, 35.2, 34.5, 31.4, 31.0, 22.9, 17.5. HRMS (ESI)  $m/z$  calcd for  $\text{C}_{39}\text{H}_{41}\text{BrN}_3\text{O}$   $[\text{M}+\text{H}]^+ = 646.2428$ , found = 646.2433; the ee value was 99%,  $t_R$  (minor) = 9.5 min,  $t_R$  (major) = 13.8 min (Chiralpak IC,  $\lambda = 254$  nm, 10% *i*-PrOH/Hexane, flow rate = 1.0 mL/min).

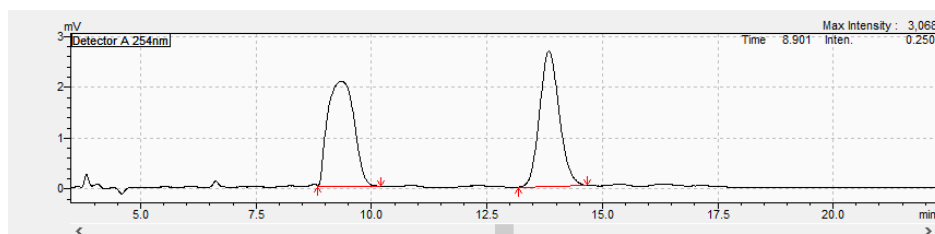

Results View - Peak Table

| Peak# | Ret. Time | Area   | Height | Conc.   | Unit | ID# | Name | Area%   |
|-------|-----------|--------|--------|---------|------|-----|------|---------|
| 1     | 9.355     | 81696  | 2065   | 50.882  |      |     |      | 50.882  |
| 2     | 13.844    | 78862  | 2661   | 49.118  |      |     |      | 49.118  |
| Total |           | 160558 | 4725   | 100.000 |      |     |      | 100.000 |

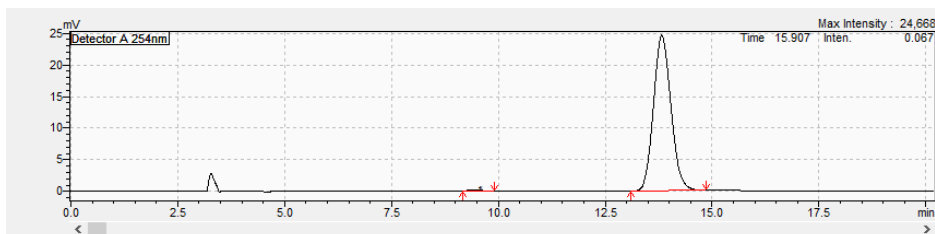

Results View - Peak Table

| Peak# | Ret. Time | Area   | Height | Conc.   | Unit | ID# | Name | Area%   |
|-------|-----------|--------|--------|---------|------|-----|------|---------|
| 1     | 9.473     | 3869   | 149    | 0.551   |      |     |      | 0.551   |
| 2     | 13.823    | 698082 | 24546  | 99.449  |      |     |      | 99.449  |
| Total |           | 701951 | 24695  | 100.000 |      |     |      | 100.000 |

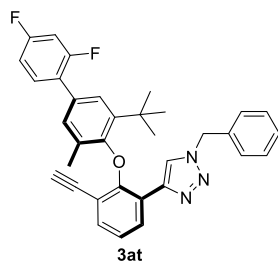

**1-Benzyl-4-(2-((3-(tert-butyl)-2',4'-difluoro-5-methyl-[1,1'-biphenyl]-4-yl)oxy)-3-ethynylphenyl)-1H-1,2,3-triazole (3at)**

72% yield;  $[\alpha]_D^{25} = -84.3$  (c 0.5,  $\text{CHCl}_3$ ), a white foam,  $R_f = 0.36$  (hexane/ethyl acetate 8:1).  $^1\text{H}$  NMR (400 MHz,  $\text{CDCl}_3$ )  $\delta$  8.44 (dd,  $J = 7.8, 1.8$  Hz, 1H), 7.98 (s, 1H), 7.40 – 7.17 (m, 7H), 7.02 (dd,  $J = 14.3, 6.6$  Hz, 2H), 6.93 – 6.74 (m, 2H), 5.62 (d,  $J = 14.9$  Hz, 1H), 5.37 (d,  $J = 15.0$  Hz, 1H), 2.61 (s, 1H), 1.82 (s, 3H), 1.23 (s, 9H).  $^{13}\text{C}$  NMR (101 MHz,  $\text{CDCl}_3$ )  $\delta$  153.7, 143.3, 142.5, 135.9, 134.7, 130.9, 129.3, 129.1, 128.7, 127.9, 125.5, 123.2, 122.3, 121.6, 111.3, 110.6, 104.3, 83.1, 78.3, 54.2, 35.2, 30.9, 17.4. HRMS (ESI)  $m/z$  calcd for  $\text{C}_{34}\text{H}_{30}\text{F}_2\text{N}_3\text{O}$   $[\text{M}+\text{H}]^+ = 534.2351$ , found = 534.235; the ee value was 99%,  $t_R$  (minor) = 12.4 min,  $t_R$  (major) = 15.9 min (Chiralpak IC,  $\lambda = 254$  nm, 10% *i*-PrOH/Hexane, flow rate = 1.0 mL/min).

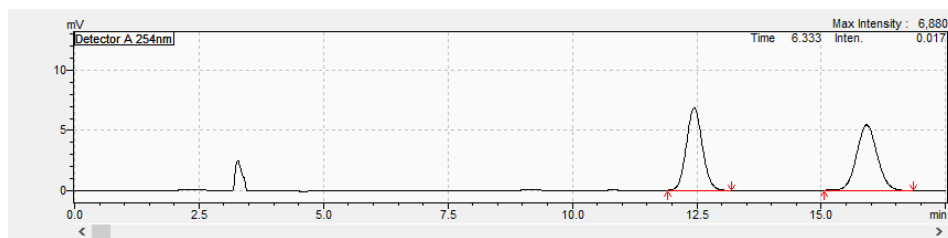

Results View - Peak Table

| Peak# | Ret. Time | Area   | Height | Conc.   | Unit | ID# | Name | Area%   |
|-------|-----------|--------|--------|---------|------|-----|------|---------|
| 1     | 12.447    | 152744 | 6851   | 49.335  |      |     |      | 49.335  |
| 2     | 15.914    | 156863 | 5448   | 50.665  |      |     |      | 50.665  |
| Total |           | 309606 | 12299  | 100.000 |      |     |      | 100.000 |

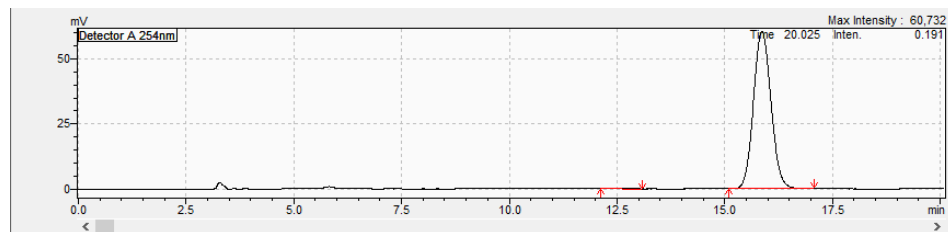

Results View - Peak Table

| Peak# | Ret. Time | Area    | Height | Conc.   | Unit | ID# | Name | Area%   |
|-------|-----------|---------|--------|---------|------|-----|------|---------|
| 1     | 12.444    | 5375    | 207    | 0.313   |      |     |      | 0.313   |
| 2     | 15.865    | 1711714 | 60671  | 99.687  |      |     |      | 99.687  |
| Total |           | 1717089 | 60878  | 100.000 |      |     |      | 100.000 |

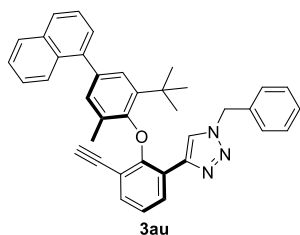

**1-Benzyl-4-(2-(2-(*tert*-butyl)-6-methyl-4-(naphthalen-1-yl)phenoxy)-3-ethynylphenyl)-1*H*-1,2,3-triazole (3au)**

71% yield;  $[\alpha]_D^{25} = -94.2$  (c 0.5,  $\text{CHCl}_3$ ), a white foam,  $R_f = 0.31$  (hexane/ethyl acetate 8:1).  $^1\text{H}$  NMR (400 MHz,  $\text{CDCl}_3$ )  $\delta$  8.46 (dd,  $J = 7.8, 1.8$  Hz, 1H), 8.06 (s, 1H), 7.91 (d,  $J = 8.3$  Hz, 1H), 7.84 (dd,  $J = 7.9, 1.6$  Hz, 1H), 7.78 (d,  $J = 8.2$  Hz, 1H), 7.53 – 7.21 (m, 9H), 7.09 – 6.98 (m, 2H), 5.64 (d,  $J = 15.0$  Hz, 1H), 5.40 (d,  $J = 15.0$  Hz, 1H), 2.75 (s, 1H), 1.85 (s, 3H), 1.25 (s, 9H).  $^{13}\text{C}$  NMR (101 MHz,  $\text{CDCl}_3$ )  $\delta$  153.9, 152.6, 143.4, 140.2, 137.0, 136.1, 134.8, 133.9, 131.7, 130.5, 130.4, 129.4, 129.1, 128.6, 128.4, 127.8, 127.5, 126.9, 126.7, 126.0, 125.8, 125.8, 125.4, 123.3, 122.2, 121.7, 83.1, 78.8, 54.2, 35.2, 31.1, 17.4. HRMS (ESI)  $m/z$  calcd for  $\text{C}_{38}\text{H}_{34}\text{N}_3\text{O}$   $[\text{M}+\text{H}]^+ = 548.2696$ , found = 548.2700; the ee value was > 99%,  $t_R$  (minor) = 12.8 min,  $t_R$  (major) = 14.2 min (Chiralpak IC,  $\lambda = 254$  nm, 10% *i*-PrOH/Hexane, flow rate = 1.0 mL/min).

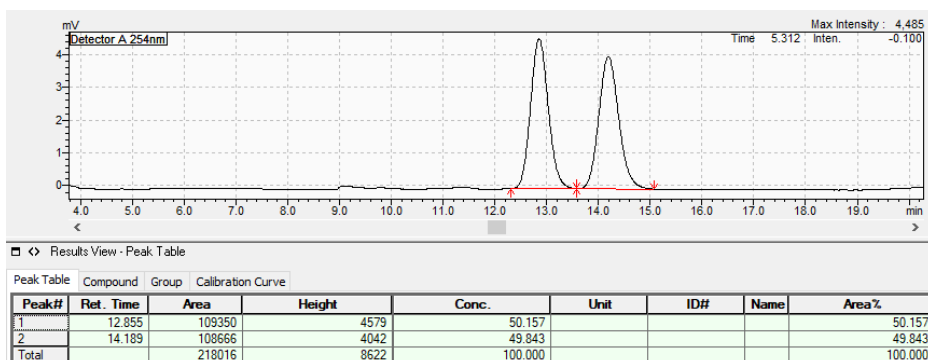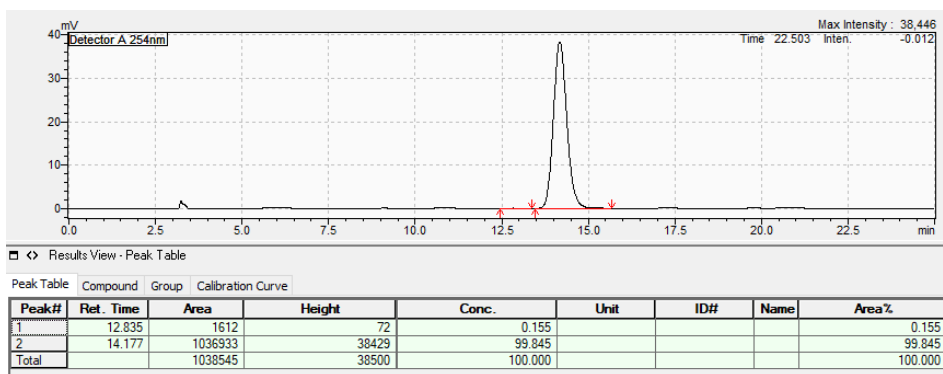

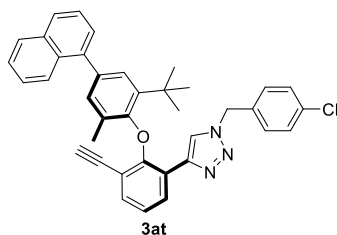

**4-(2-(2-(*tert*-Butyl)-6-methyl-4-(naphthalen-1-yl)phenoxy)-3-ethynylphenyl)-1-(4-chlorobenzyl)-1*H*-1,2,3-triazole (3av)**

74% yield;  $[\alpha]_D^{25} = -87.1$  (c 0.5,  $\text{CHCl}_3$ ), a white foam,  $R_f = 0.33$  (hexane/ethyl acetate 8:1).  $^1\text{H}$  NMR (400 MHz,  $\text{CDCl}_3$ )  $\delta$  8.45 (dd,  $J = 7.8, 1.8$  Hz, 1H), 8.05 (s, 1H), 7.91 (d,  $J = 8.2$  Hz, 1H), 7.88 – 7.82 (m, 1H), 7.79 (d,  $J = 8.2$  Hz, 1H), 7.52 – 7.30 (m, 5H), 7.29 – 7.23 (m, 2H), 7.17 – 7.10 (m, 2H), 7.10 – 6.95 (m, 2H), 5.60 (d,  $J = 15.2$  Hz, 1H), 5.38 (d,  $J = 15.1$  Hz, 1H), 2.75 (s, 1H), 1.85 (s, 3H), 1.26 (s, 9H).  $^{13}\text{C}$  NMR (101 MHz,  $\text{CDCl}_3$ )  $\delta$  153.9, 152.5, 143.5, 136.2, 133.9, 133.4, 130.5, 130.4, 129.3, 129.3, 129.2, 128.4, 127.6, 126.9, 126.7, 126.1, 125.8, 125.4, 123.2, 122.3, 83.2, 78.7, 53.5, 35.3, 31.0, 17.5. HRMS (ESI)  $m/z$  calcd for  $\text{C}_{38}\text{H}_{33}\text{ClN}_3\text{O}$   $[\text{M}+\text{H}]^+ = 582.2307$ , found = 582.2310; the ee value was 95%,  $t_R$  (minor) = 11.7 min,  $t_R$  (major) = 12.8 min (Chiralpak IC,  $\lambda = 254$  nm, 10% *i*-PrOH/Hexane, flow rate = 1.0 mL/min).

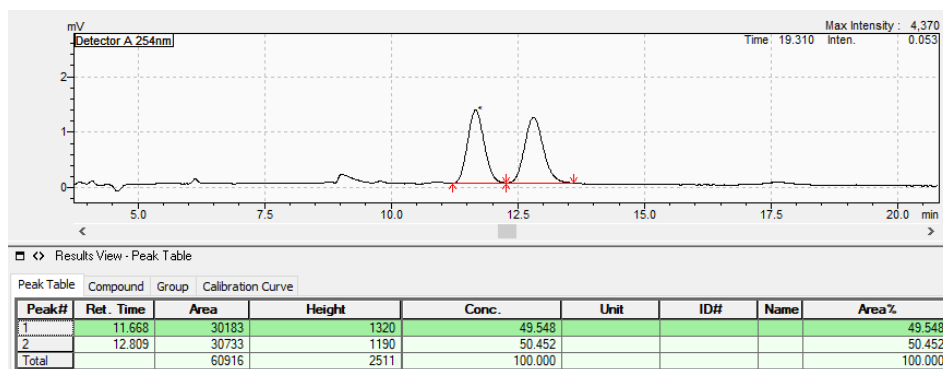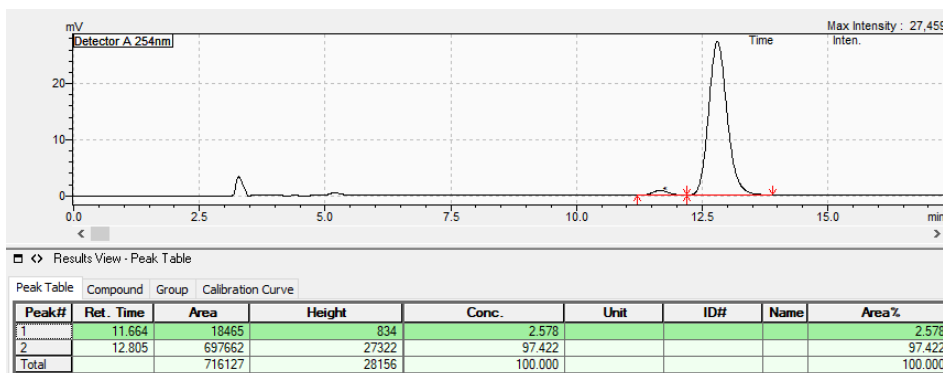

## 6. Synthetic Applications

### (1) Modification of biologically active compounds

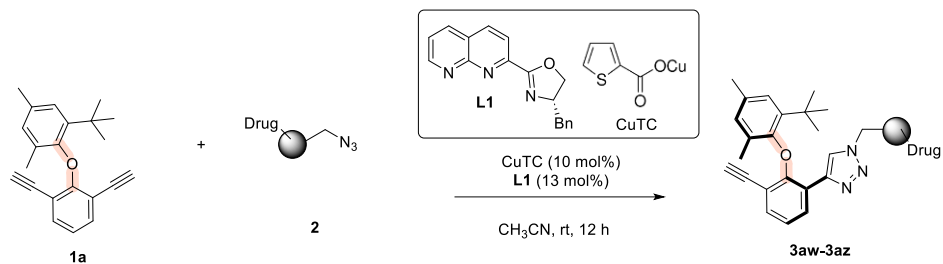

To a dried and argon-filled 10 mL Schlenk tube equipped with a magnetic stir bar was added CuTC (10 mol%) and **L1** (13 mol%) in CH<sub>3</sub>CN (1.5 ml). The reaction mixture was stirred under at room temperature for 1 h. Then the solution of **1a** (0.05 mmol, 1.0 equiv.) and **2** (0.09 mmol, 1.8 equiv.) in CH<sub>3</sub>CN (0.5 mL) was added. The reaction mixture was stirred at room temperature for 12 h. Then the reaction mixture was concentrated under reduced pressure and the residue was purified by column chromatography on silica gel to furnish the product.

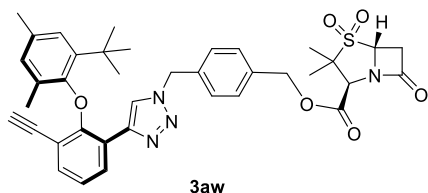

**4-((4-(2-(2-(*tert*-Butyl)-4,6-dimethylphenoxy)-3-ethynylphenyl)-1*H*-1,2,3-triazol-1-yl)methyl)benzyl (2*S*,5*R*)-3,3-dimethyl-7-oxo-4-thia-1-azabicyclo[3.2.0]heptane-2-carboxylate 4,4-dioxide (3aw)**

61% yield;  $[\alpha]_D^{25} = -17.3$  (c 1.0, CHCl<sub>3</sub>), dr > 20 : 1, a white foam,  $R_f = 0.33$  (hexane/ethyl acetate 1:1). <sup>1</sup>H NMR (400 MHz, CDCl<sub>3</sub>)  $\delta$  8.41 (dd,  $J = 7.8, 1.8$  Hz, 1H), 8.00 (s, 1H), 7.31 – 7.23 (m, 3H), 7.20 – 7.14 (m, 3H), 7.00 (t,  $J = 7.7$  Hz, 1H), 6.91 (d,  $J = 2.2$  Hz, 1H), 6.70 (dt,  $J = 2.3, 0.8$  Hz, 1H), 5.58 (d,  $J = 15.2$  Hz, 1H), 5.39 (d,  $J = 15.2$  Hz, 1H), 5.16 (d,  $J = 12.2$  Hz, 1H), 5.07 (d,  $J = 12.2$  Hz, 1H), 4.52 (dd,  $J = 4.1, 2.3$  Hz, 1H), 4.33 (s, 1H), 3.39 (dd,  $J = 6.2, 3.2$  Hz, 2H), 2.58 (s, 1H), 2.24 (s, 3H), 1.73 (s, 3H), 1.47 (s, 3H), 1.21 (d,  $J = 3.9$  Hz, 14H). <sup>13</sup>C NMR (101 MHz, CDCl<sub>3</sub>)  $\delta$  170.7, 166.8, 141.9, 135.9, 135.8, 134.7, 134.0, 130.4, 129.3, 129.2, 129.1, 128.1, 125.3, 122.0, 110.5, 82.9, 78.4, 77.3, 67.5, 63.2, 62.7, 61.18, 53.6, 38.4, 35.0, 31.1, 21.1, 20.2, 18.6, 17.2. HRMS (ESI)  $m/z$  calcd for C<sub>38</sub>H<sub>41</sub>N<sub>4</sub>O<sub>6</sub>S [M+H]<sup>+</sup> = 681.2741, found = 681.2740.

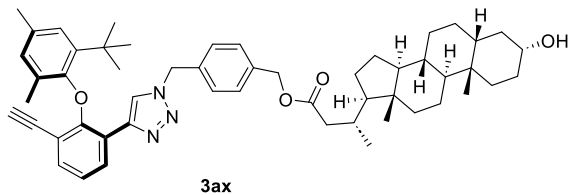

**4-((4-(2-(2-(*tert*-Butyl)-4,6-dimethylphenoxy)-3-ethynylphenyl)-1*H*-1,2,3-triazol-1-yl)methyl)benzyl (R)-3-((3*R*,5*R*,8*R*,9*S*,10*S*,13*R*,14*S*,17*R*)-3-hydroxy-10,13-dimethylhexadecahydro-1*H*-cyclopenta[*a*]phenanthren-17-yl)butanoate (3ax)**

75% yield;  $[\alpha]_D^{25} = -30.6$  (c 0.5, CHCl<sub>3</sub>), dr > 20 : 1, a white foam,  $R_f = 0.32$  (hexane/ethyl acetate 4:1). <sup>1</sup>H NMR (400 MHz, CDCl<sub>3</sub>) δ 8.40 (dd,  $J = 7.8, 1.8$  Hz, 1H), 7.96 (s, 1H), 7.33 – 7.14 (m, 6H), 6.99 (t,  $J = 7.7$  Hz, 1H), 6.90 (d,  $J = 2.2$  Hz, 1H), 6.69 (d,  $J = 2.2$  Hz, 1H), 5.58 (d,  $J = 15.0$  Hz, 1H), 5.35 (d,  $J = 15.0$  Hz, 1H), 4.99 (s, 2H), 3.55 (tt,  $J = 11.0, 4.6$  Hz, 1H), 2.58 (s, 1H), 2.38 – 2.13 (m, 5H), 1.98 – 1.39 (m, 19H), 1.39 – 0.78 (m, 45H), 0.55 (s, 3H). <sup>13</sup>C NMR (101 MHz, CDCl<sub>3</sub>) δ 174.0, 154.1, 151.0, 143.4, 141.9, 136.7, 135.9, 134.7, 133.9, 130.5, 129.2, 129.1, 128.8, 128.0, 125.3, 123.2, 121.9, 121.4, 110.4, 82.8, 71.8, 65.4, 56.5, 55.9, 53.8, 42.7, 42.1, 40.4, 40.1, 36.4, 35.8, 35.3, 35.3, 34.9, 34.5, 31.2, 31.0, 30.9, 30.5, 28.2, 27.2, 26.4, 24.2, 23.3, 21.1, 20.8, 18.2, 17.2, 12.1. HRMS (ESI)  $m/z$  calcd for C<sub>53</sub>H<sub>68</sub>N<sub>3</sub>O<sub>4</sub> [M+H]<sup>+</sup> = 810.5204, found = 810.5209.

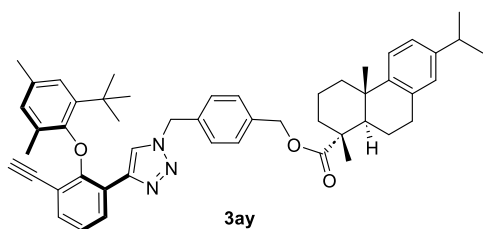

**4-((4-(2-(2-(*tert*-butyl)-4,6-dimethylphenoxy)-3-ethynylphenyl)-1*H*-1,2,3-triazol-1-yl)methyl)benzyl (1*R*,4*aS*,10*aR*)-7-isopropyl-1,4*a*-dimethyl-1,2,3,4,4*a*,9,10,10*a*-octahydrophenanthrene-1-carboxylate (3ay)**

72% yield;  $[\alpha]_D^{25} = -26.5$  (c 0.2, CHCl<sub>3</sub>), dr > 20 : 1, a white foam,  $R_f = 0.32$  (hexane/ethyl acetate 6:1). <sup>1</sup>H NMR (400 MHz, CDCl<sub>3</sub>) δ 8.41 (dd,  $J = 7.8, 1.8$  Hz, 1H), 7.97 (s, 1H), 7.25 (dd,  $J = 7.7, 1.8$  Hz, 1H), 7.20 (d,  $J = 8.2$  Hz, 2H), 7.14 (d,  $J = 8.2$  Hz, 2H), 7.08 (d,  $J = 8.1$  Hz, 1H), 6.99 (t,  $J = 7.7$  Hz, 1H), 6.95 – 6.86 (m, 2H), 6.78 (d,  $J = 2.0$  Hz, 1H), 6.68 (d,  $J = 2.2$  Hz, 1H), 5.57 (d,  $J = 15.1$  Hz, 1H), 5.35 (d,  $J = 15.1$  Hz, 1H), 4.99 (q,  $J = 12.6$  Hz, 2H), 2.71 (ddd,  $J = 12.5, 10.4, 6.3$  Hz, 3H), 2.57 (s, 1H), 2.27 – 2.11 (m, 5H), 1.77 – 1.49 (m, 11H), 1.24 – 1.08 (m, 24H), 0.84 – 0.73 (m, 2H). <sup>13</sup>C NMR (101 MHz, CDCl<sub>3</sub>) δ 178.2, 146.8, 145.8, 141.9, 136.9, 135.9, 134.6, 134.6,

133.9, 130.5, 129.2, 129.1, 128.6, 127.9, 126.9, 125.3, 124.1, 123.9, 123.2, 121.9, 110.5, 82.8, 65.7, 53.8, 47.7, 44.8, 37.9, 37.0, 36.6, 34.9, 33.4, 31.0, 30.0, 25.3, 24.0, 23.9, 21.7, 21.1, 18.6, 17.2, 16.6. HRMS (ESI)  $m/z$  calcd for  $C_{50}H_{58}N_3O_3$   $[M+H]^+ = 748.4473$ , found = 748.4470.

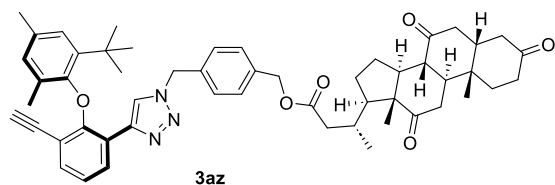

**4-((4-(2-(2-(*tert*-Butyl)-4,6-dimethylphenoxy)-3-ethynylphenyl)-1H-1,2,3-triazol-1-yl)methyl)benzyl (R)-3-((5S,8R,9S,10S,13R,14S,17R)-10,13-dimethyl-3,7,12-trioxohexadecahydro-1H-cyclopenta[a]phenanthren-17-yl)butanoate (3az)**

79% yield;  $[\alpha]_D^{25} = -22.6$  (c 1.0,  $CHCl_3$ ), dr > 20 : 1, a white foam,  $R_f = 0.33$  (hexane/ethyl acetate 3:1).  $^1H$  NMR (400 MHz,  $CDCl_3$ )  $\delta$  8.49 (dd,  $J = 7.8, 1.8$  Hz, 1H), 8.07 (s, 1H), 7.33 (dd,  $J = 8.5, 6.9$  Hz, 3H), 7.24 (d,  $J = 8.0$  Hz, 2H), 7.08 (t,  $J = 7.7$  Hz, 1H), 6.99 (d,  $J = 2.1$  Hz, 1H), 6.78 (d,  $J = 2.1$  Hz, 1H), 5.66 (d,  $J = 15.1$  Hz, 1H), 5.45 (d,  $J = 15.1$  Hz, 1H), 5.19 – 5.01 (m, 2H), 3.07 – 2.80 (m, 3H), 2.67 (s, 1H), 2.52 – 1.49 (m, 31H), 1.38 – 0.84 (m, 49H).  $^{13}C$  NMR (101 MHz,  $CDCl_3$ )  $\delta$  212.0, 209.1, 208.8, 173.7, 136.6, 135.9, 134.8, 134.0, 130.4, 129.2, 129.1, 128.9, 127.9, 125.3, 121.9, 82.9, 77.2, 65.4, 56.9, 53.8, 51.7, 48.9, 46.8, 45.6, 45.5, 45.0, 42.8, 38.6, 36.5, 36.0, 35.4, 35.3, 34.9, 31.6, 31.4, 31.0, 30.3, 29.0, 27.6, 25.2, 25.1, 22.7, 21.9, 21.1, 18.6, 17.2, 14.1, 11.8, 11.4. HRMS (ESI)  $m/z$  calcd for  $C_{53}H_{62}N_3O_6$   $[M+H]^+ = 836.4633$ , found = 836.4639.

(2) Synthesis of bis-triazoles

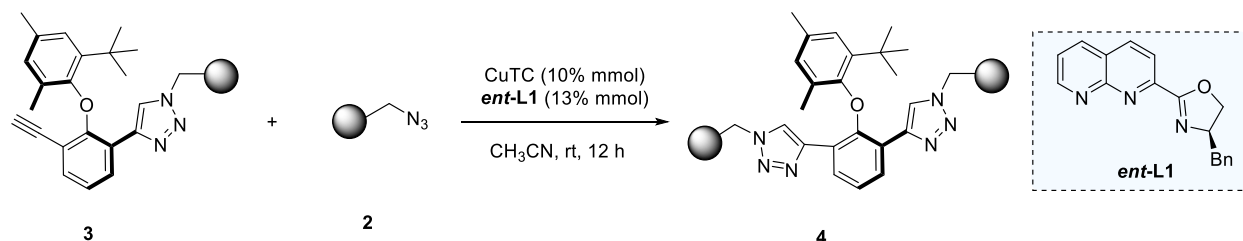

To a dried and argon-filled 10 mL Schlenk tube equipped with a magnetic stir bar was added CuTC (10 mol%) and *ent-L1* (13 mol%) in  $CH_3CN$  (1.5 mL). The reaction mixture was stirred under at room temperature for 1 h. Then the solution of **3** (0.05 mmol, 1.0 equiv.) and **2** (0.09 mmol, 1.8 equiv.) in  $CH_3CN$  (0.5 mL) was added. The reaction mixture was stirred at room temperature for 12 h. Then the reaction mixture was concentrated under reduced pressure and the residue was purified by column chromatography on silica gel to furnish the product.

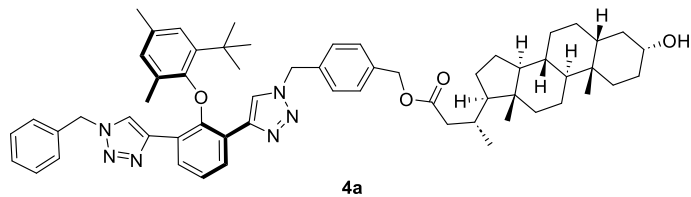

**4-((4-(3-(1-Benzyl-1H-1,2,3-triazol-4-yl)-2-(2-(*tert*-butyl)-4,6-dimethylphenoxy)phenyl)-1H-1,2,3-triazol-1-yl)methyl)benzyl (R)-3-((3R,5R,8R,9S,10S,13R,14S,17R)-3-hydroxy-10,13-dimethylhexadecahydro-1H-cyclopenta[a]phenanthren-17-yl)butanoate (4a)**

92% yield;  $[\alpha]_D^{25} = +5.4$  (c 0.5,  $\text{CHCl}_3$ ), dr > 20 : 1, a white foam,  $R_f = 0.31$  (hexane/ethyl acetate 2:1).  $^1\text{H NMR}$  (400 MHz,  $\text{CDCl}_3$ )  $\delta$  7.85 (t,  $J = 6.9$  Hz, 1H), 7.34 – 7.23 (m, 2H), 7.19 – 7.06 (m, 2H), 6.82 (d,  $J = 13.7$  Hz, 1H), 6.61 (d,  $J = 3.2$  Hz, 1H), 5.36 (dd,  $J = 14.9, 1.8$  Hz, 1H), 5.17 (dd,  $J = 14.9, 1.9$  Hz, 1H), 5.01 (s, 1H), 3.56 (tt,  $J = 10.6, 4.6$  Hz, 1H), 2.38 – 2.13 (m, 3H), 1.96 – 1.38 (m, 10H), 1.38 – 0.92 (m, 12H), 0.91 – 0.71 (m, 10H), 0.55 (s, 2H).  $^{13}\text{C NMR}$  (101 MHz,  $\text{CDCl}_3$ )  $\delta$  174.0, 136.8, 134.5, 132.4, 131.6, 131.5, 130.8, 129.0, 128.8, 128.7, 128.3, 128.1, 128.1, 126.3, 123.4, 122.6, 71.9, 65.5, 56.5, 55.9, 54.0, 53.6, 42.8, 42.1, 40.4, 40.2, 36.5, 35.9, 35.4, 34.8, 34.6, 31.2, 30.9, 30.6, 30.4, 28.2, 27.2, 26.4, 24.2, 23.4, 21.0, 20.8, 18.3, 18.0, 12.1. HRMS (ESI)  $m/z$  calcd for  $\text{C}_{60}\text{H}_{75}\text{N}_6\text{O}_4$   $[\text{M}+\text{H}]^+ = 943.5844$ , found = 943.5847.

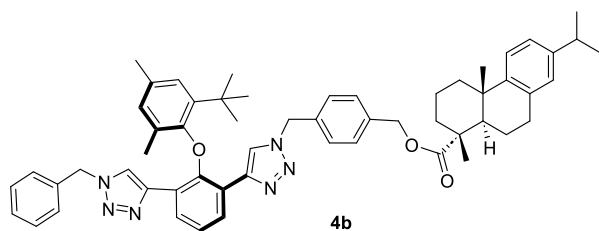

**4-((4-(3-(1-Benzyl-1H-1,2,3-triazol-4-yl)-2-(2-(*tert*-butyl)-4,6-dimethylphenoxy)phenyl)-1H-1,2,3-triazol-1-yl)methyl)benzyl (1R,4aS,10aR)-7-isopropyl-1,4a-dimethyl-1,2,3,4,4a,9,10,10a-octahydrophenanthrene-1-carboxylate (4b)**

88% yield;  $[\alpha]_D^{25} = +7.2$  (c 0.5,  $\text{CHCl}_3$ ), dr > 20 : 1, a white foam,  $R_f = 0.34$  (hexane/ethyl acetate 2:1).  $^1\text{H NMR}$  (400 MHz,  $\text{CDCl}_3$ )  $\delta$  7.93 – 7.83 (m, 1H), 7.35 – 7.20 (m, 3H), 7.16 – 7.02 (m, 3H), 6.92 (dd,  $J = 8.2, 2.0$  Hz, 1H), 6.86 – 6.54 (m, 3H), 5.35 (dd,  $J = 14.8, 7.5$  Hz, 1H), 5.17 (dd,  $J = 14.8, 2.1$  Hz, 1H), 5.00 (q,  $J = 12.6$  Hz, 1H), 2.83 – 2.63 (m, 2H), 2.28 – 2.14 (m, 3H), 1.80 – 1.55 (m, 5H), 1.47 – 1.26 (m, 2H), 1.23 – 1.11 (m, 8H), 0.82 (s, 6H).  $^{13}\text{C NMR}$  (101 MHz,  $\text{CDCl}_3$ )  $\delta$  178.3, 152.8, 140.5, 134.5, 134.3, 132.4, 131.5, 131.4, 130.7, 129.0, 128.7, 128.5, 128.2, 128.1, 126.9, 126.2, 124.2, 124.0, 123.3, 122.9, 65.7, 53.9, 53.6, 47.7, 44.8, 37.9, 36.9, 36.6, 34.8, 33.5,



30.4, 30.0, 25.3, 24.0, 23.9, 21.7, 21.0, 18.6, 18.0, 16.6. HRMS (ESI)  $m/z$  calcd for  $C_{57}H_{65}N_6O_3$   $[M+H]^+ = 881.5113$ , found = 881.5112.

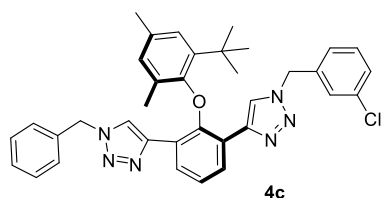

### 1-Benzyl-4-(2-(2-(*tert*-butyl)-4,6-dimethylphenoxy)-3-(1-(3-chlorobenzyl)-1*H*-1,2,3-triazol-4-yl)phenyl)-1*H*-1,2,3-triazole (**4c**)

84% yield;  $[\alpha]_D^{25} = +5.0$  (c 0.5,  $CHCl_3$ ), a white foam,  $R_f = 0.30$  (hexane/ethyl acetate 2:1).  $^1H$  NMR (400 MHz,  $CDCl_3$ )  $\delta$  7.86 (dq,  $J = 7.7, 1.8$  Hz, 2H), 7.32 – 7.22 (m, 4H), 7.17 – 7.09 (m, 3H), 7.02 (dd,  $J = 7.4, 1.6$  Hz, 1H), 6.82 (d,  $J = 1.1$  Hz, 2H), 6.68 – 6.57 (m, 2H), 5.35 (dd,  $J = 14.9, 6.8$  Hz, 2H), 5.14 (dd,  $J = 16.2, 14.8$  Hz, 2H), 2.22 (s, 3H), 1.68 (s, 4H), 0.83 (s, 9H).  $^{13}C$  NMR (101 MHz,  $CDCl_3$ )  $\delta$  152.8, 151.0, 140.3, 136.5, 134.9, 134.5, 132.5, 131.6, 131.4, 130.8, 130.3, 129.0, 128.9, 128.7, 128.2, 128.1, 128.0, 126.3, 126.2, 123.4, 123.0, 122.7, 54.0, 53.2, 34.8, 30.4, 21.0, 18.0. HRMS (ESI)  $m/z$  calcd for  $C_{36}H_{36}ClN_6O$   $[M+H]^+ = 881.5113$ , found = 881.5110; the ee value was 91%,  $t_R$  (minor) = 14.5 min,  $t_R$  (major) = 24.4 min (Chiralpak IC,  $\lambda = 254$  nm, 10% *i*-PrOH/Hexane, flow rate = 1.0 mL/min).

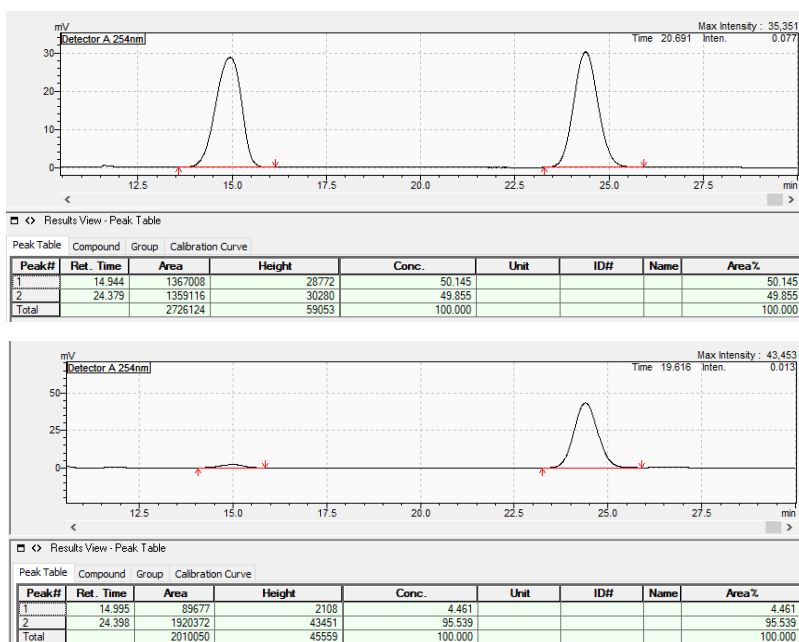

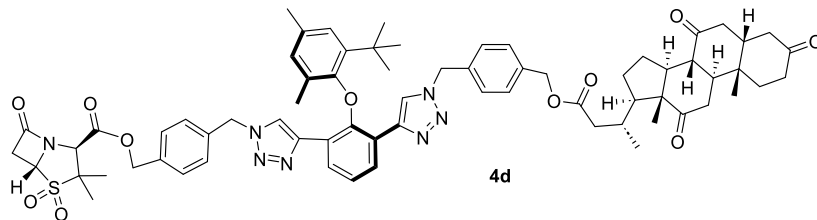

**4-((4-(2-(2-(*tert*-Butyl)-4,6-dimethylphenoxy)-3-(1-(4-(((*R*)-3-((5*S*,8*R*,9*S*,10*S*,13*R*,14*S*,17*R*)-10,13-dimethyl-3,7,12-trioxohexadecahydro-1*H*-cyclopenta[*a*]phenanthren-17-yl)butanoyl)oxy)methyl)benzyl)-1*H*-1,2,3-triazol-4-yl)phenyl)-1*H*-1,2,3-triazol-1-yl)methyl)benzyl (2*S*,5*R*)-3,3-dimethyl-7-oxo-4-thia-1-azabicyclo[3.2.0]heptane-2-carboxylate 4,4-dioxide (4d)**

87% yield;  $[\alpha]_D^{25} = +7.2$  (c 0.5,  $\text{CHCl}_3$ ), dr > 20 : 1, a white foam,  $R_f = 0.30$  (hexane/ethyl acetate 1:1).  $^1\text{H NMR}$  (400 MHz,  $\text{CDCl}_3$ )  $\delta$  7.90 (d,  $J = 7.6$  Hz, 1H), 7.80 (d,  $J = 7.6$  Hz, 1H), 7.26 (dd,  $J = 8.1, 3.5$  Hz, 4H), 7.13 (dt,  $J = 13.9, 7.1$  Hz, 5H), 6.93 (s, 1H), 6.75 (s, 1H), 6.68 – 6.57 (m, 2H), 5.52 – 4.95 (m, 9H), 4.53 (dd,  $J = 4.1, 2.3$  Hz, 1H), 4.33 (s, 1H), 3.40 (dd,  $J = 6.4, 3.2$  Hz, 2H), 2.94 – 2.73 (m, 3H), 2.46 – 1.73 (m, 23H), 1.36 – 1.09 (m, 18H), 1.02 – 0.71 (m, 20H).  $^{13}\text{C NMR}$  (101 MHz,  $\text{CDCl}_3$ )  $\delta$  212.0, 209.1, 208.8, 173.8, 134.5, 132.5, 131.8, 131.3, 130.8, 129.3, 128.8, 128.4, 128.2, 126.2, 123.4, 122.6, 67.5, 65.5, 63.2, 62.7, 61.1, 56.9, 53.6, 53.4, 51.8, 49.0, 46.9, 45.6, 45.0, 42.8, 38.6, 38.3, 36.5, 36.0, 35.5, 35.2, 34.8, 31.5, 30.5, 27.6, 25.1, 21.9, 21.0, 20.3, 18.6, 18.6, 18.0, 11.8. HRMS (ESI)  $m/z$  calcd for  $\text{C}_{69}\text{H}_{80}\text{N}_7\text{O}_{11}\text{S}$   $[\text{M}+\text{H}]^+ = 1214.5631$ , found = 1214.5639.

(3) Scale-up experiment

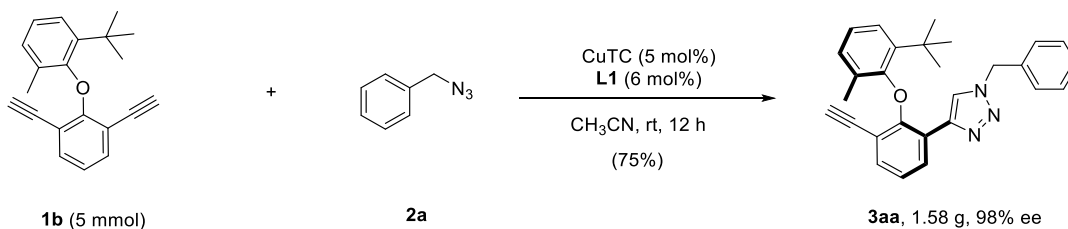

To a dried and argon-filled 10 mL Schlenk tube equipped with a magnetic stir bar was added CuTC (5 mol%) and *ent*-L1 (6 mol%) in  $\text{CH}_3\text{CN}$  (20 ml). The reaction mixture was stirred under at room temperature for 1 h. Then the solution of **1b** (5 mmol, 1.0 equiv.) and **2a** (9 mmol, 1.8 equiv.) in  $\text{CH}_3\text{CN}$  (2 mL) was added. The reaction mixture was stirred at room temperature for 12 h. Then the reaction mixture was concentrated under reduced pressure and the residue was purified by column chromatography on silica gel to furnish the product **3aa** (1.58 g, 75%, 98% ee).

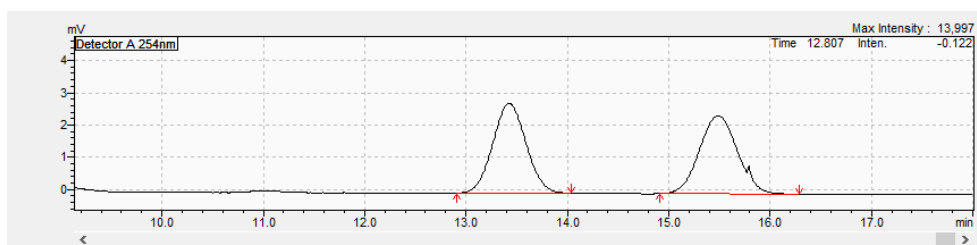

Results View - Peak Table

| Peak# | Ret. Time | Area   | Height | Conc.   | Unit | ID# | Name | Area%   |
|-------|-----------|--------|--------|---------|------|-----|------|---------|
| 1     | 13.426    | 63530  | 2787   | 49.892  |      |     |      | 49.892  |
| 2     | 15.490    | 63806  | 2424   | 50.108  |      |     |      | 50.108  |
| Total |           | 127336 | 5211   | 100.000 |      |     |      | 100.000 |

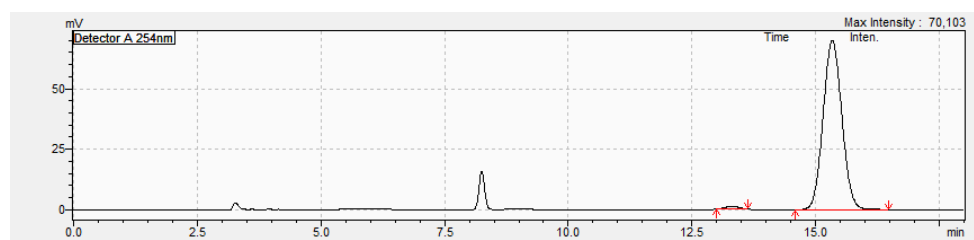

Results View - Peak Table

| Peak# | Ret. Time | Area    | Height | Conc.   | Unit | ID# | Name | Area%   |
|-------|-----------|---------|--------|---------|------|-----|------|---------|
| 1     | 13.313    | 22714   | 1116   | 1.216   |      |     |      | 1.216   |
| 2     | 15.337    | 1844567 | 70099  | 98.784  |      |     |      | 98.784  |
| Total |           | 1867281 | 71216  | 100.000 |      |     |      | 100.000 |

#### (4) Transformation of products

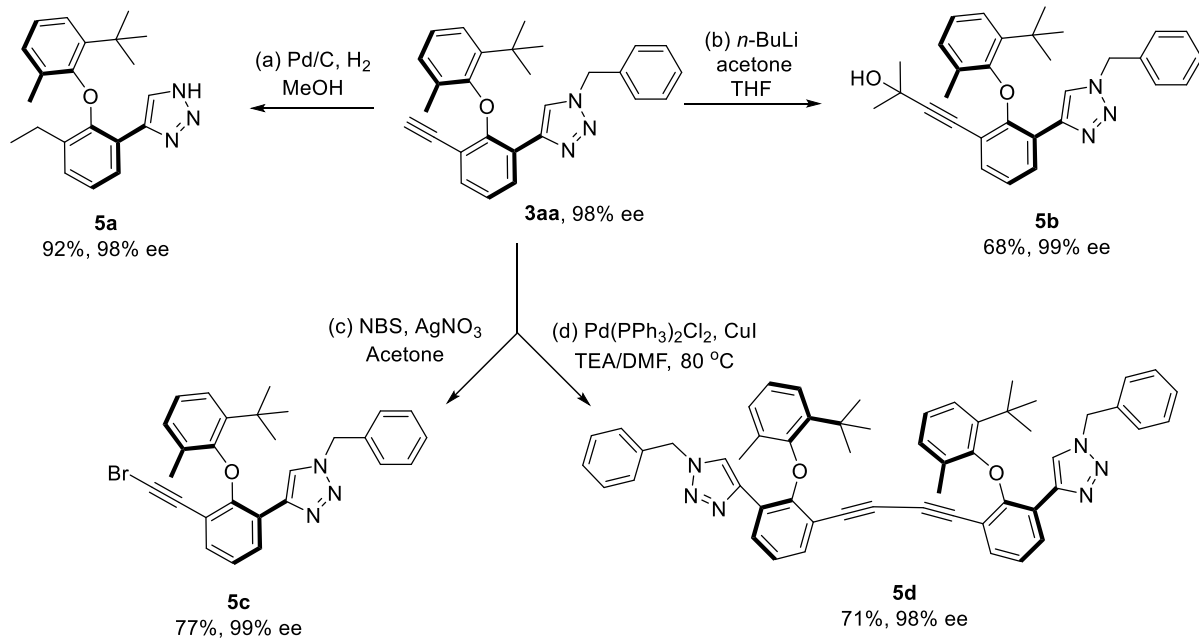

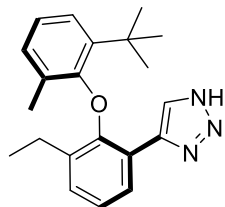

5a

#### 4-(2-(2-(*tert*-Butyl)-6-methylphenoxy)-3-ethylphenyl)-1H-1,2,3-triazole (5a)

To a solution of **3aa** (0.1 mmol, 1.0 equiv.) in MeOH (2 mL) was added Pd/C (10%, 0.01 mmol) at room temperature, and the flask was evacuated and purged with H<sub>2</sub> for 3 times. After stirring for 12 h, the mixture was filtered through Celite and washed with EtOAc. The filtrate was concentrated in vacuo to give a residue, which was purified by chromatography column to afford desired product. 92% yield;  $[\alpha]_D^{25} = -105.6$  (c 0.5, CHCl<sub>3</sub>), a white foam,  $R_f = 0.33$  (hexane/ethyl acetate 3:1). <sup>1</sup>H NMR (400 MHz, CDCl<sub>3</sub>)  $\delta$  7.92 (s, 1H), 7.76 (dd,  $J = 7.6, 1.8$  Hz, 1H), 7.26 – 7.14 (m, 3H), 7.08 (t,  $J = 7.6$  Hz, 1H), 6.90 (t,  $J = 7.6$  Hz, 1H), 6.84 (dd,  $J = 7.6, 1.8$  Hz, 1H), 5.35 (s, 1H), 2.26 (dt,  $J = 15.1, 7.5$  Hz, 1H), 2.10 (dt,  $J = 15.0, 7.5$  Hz, 1H), 1.67 (s, 3H), 1.35 (s, 9H), 0.90 (t,  $J = 7.5$  Hz, 3H). <sup>13</sup>C NMR (101 MHz, CDCl<sub>3</sub>)  $\delta$  154.5, 151.7, 139.6, 133.9, 130.8, 130.8, 127.4, 127.1, 125.7, 123.5, 123.4, 35.4, 30.8, 22.4, 18.3, 14.1. HRMS (ESI)  $m/z$  calcd for C<sub>21</sub>H<sub>26</sub>N<sub>3</sub>O [M+H]<sup>+</sup> = 336.2070, found = 336.2074; the ee value was 98%,  $t_R$  (minor) = 15.4 min,  $t_R$  (major) = 22.8 min (Chiralpak IC,  $\lambda = 254$  nm, 10% *i*-PrOH/Hexane, flow rate = 1.0 mL/min).

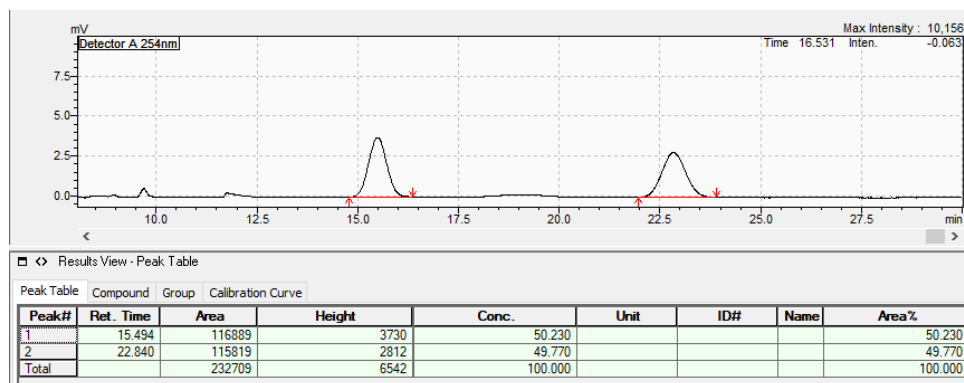

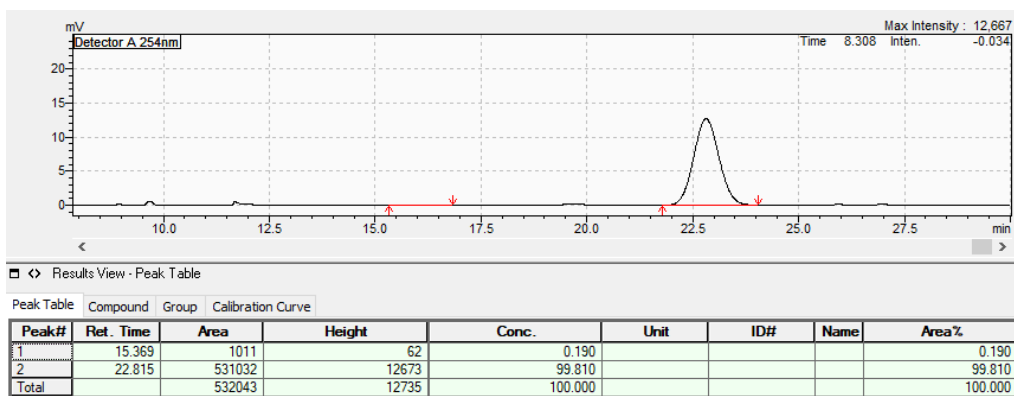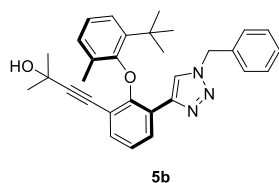

#### 4-(3-(1-Benzyl-1*H*-1,2,3-triazol-4-yl)-2-(2-(tert-butyl)-6-methylphenoxy)phenyl)-2-methylbut-3-yn-2-ol (5b)

To a solution of **3aa** (0.1 mmol, 1.0 equiv.) in THF (2 mL) was added *n*-BuLi (0.14 mmol) at -78 °C. After stirring for 30 min, acetone (0.2 mmol) was added to the reaction mixture. After 12 h, the reaction mixture was concentrated in vacuo to give a residue, which was purified by chromatography column to afford desired product. 68% yield;  $[\alpha]_D^{25} = -120.2$  (c 0.5, CHCl<sub>3</sub>), a white foam,  $R_f = 0.33$  (hexane/ethyl acetate 4:1). <sup>1</sup>H NMR (400 MHz, CDCl<sub>3</sub>) δ 8.38 (dd, *J* = 7.8, 1.8 Hz, 1H), 7.91 (s, 1H), 7.31 – 7.14 (m, 7H), 7.06 – 6.92 (m, 3H), 5.60 (d, *J* = 14.9 Hz, 1H), 5.34 (d, *J* = 15.0 Hz, 1H), 1.76 (s, 3H), 1.22 (s, 9H), 1.17 (s, 3H), 1.15 (s, 3H). <sup>13</sup>C NMR (101 MHz, CDCl<sub>3</sub>) δ 153.4, 152.5, 143.4, 142.2, 135.4, 134.8, 131.2, 129.5, 129.0, 128.8, 128.6, 127.8, 124.9, 123.9, 123.2, 122.3, 121.7, 111.3, 100.0, 77.7, 64.7, 54.2, 35.2, 30.7, 30.7, 30.5, 17.6. HRMS (ESI) *m/z* calcd for C<sub>31</sub>H<sub>34</sub>N<sub>3</sub>O<sub>2</sub> [M+H]<sup>+</sup> = 480.2646, found = 480.2649; the ee value was 99%, *t<sub>R</sub>* (minor) = 20.4 min, *t<sub>R</sub>* (major) = 30.4 min (Chiralpak IC, λ = 254 nm, 10% *i*-PrOH/Hexane, flow rate = 1.0 mL/min).

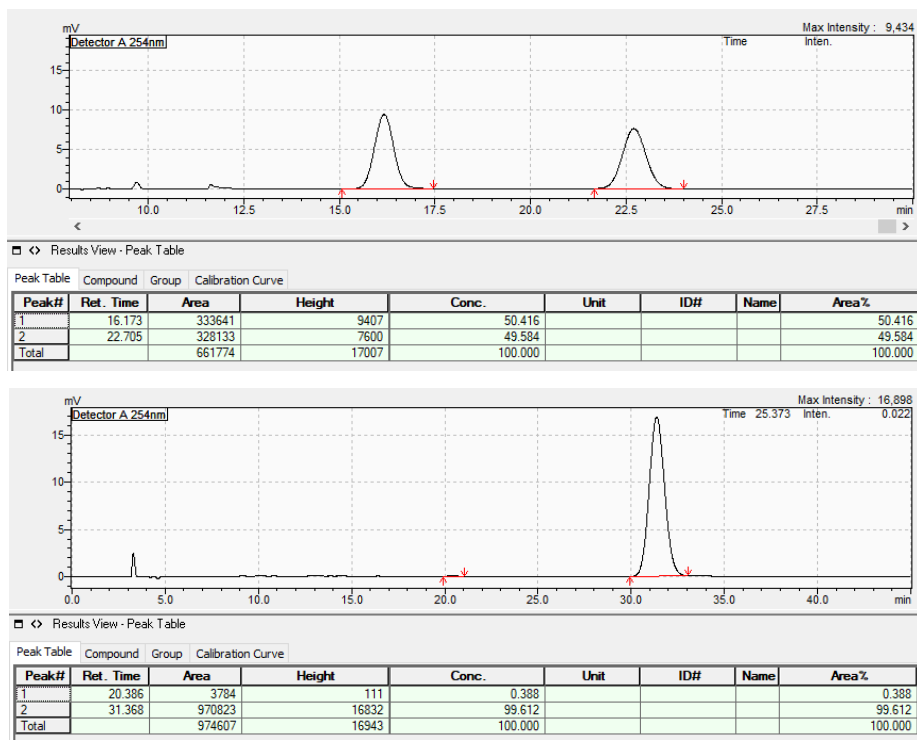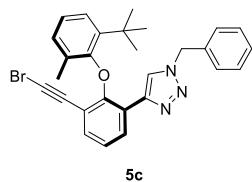

### 1-Benzyl-4-(3-(bromoethynyl)-2-(2-(*tert*-butyl)-6-methylphenoxy)phenyl)-1*H*-1,2,3-triazole (5c)

To a solution of **3aa** (0.1 mmol, 1.0 equiv.) in acetone (2 mL) was added AgNO<sub>3</sub> (0.12 mmol) and NBS (0.12 mmol) at room temperature. After stirring for 12 h, the mixture was filtered through Celite and washed with EtOAc. The filtrate was concentrated in vacuo to give a residue, which was purified by chromatography column to afford desired product. 77% yield;  $[\alpha]_D^{25} = -85.0$  (c 0.5, CHCl<sub>3</sub>), a white foam,  $R_f = 0.34$  (hexane/ethyl acetate 8:1). <sup>1</sup>H NMR (400 MHz, CDCl<sub>3</sub>)  $\delta$  8.41 (dd,  $J = 7.8, 1.8$  Hz, 1H), 7.96 (s, 1H), 7.28 – 7.13 (m, 7H), 7.05 – 6.86 (m, 3H), 5.59 (d,  $J = 15.0$  Hz, 1H), 5.35 (d,  $J = 14.9$  Hz, 1H), 1.71 (s, 3H), 1.23 (s, 9H). <sup>13</sup>C NMR (101 MHz, CDCl<sub>3</sub>)  $\delta$  152.5, 151.3, 142.2, 140.6, 134.3, 133.7, 128.6, 128.5, 128.0, 128.0, 127.6, 126.8, 124.3, 124.1, 122.2, 121.2, 120.8, 110.2, 74.4, 53.1, 34.1, 29.8, 16.3. HRMS (ESI)  $m/z$  calcd for C<sub>28</sub>H<sub>27</sub>BrN<sub>3</sub>O  $[M+H]^+ = 500.1332$ , found = 500.1334; the ee value was 99%,  $t_R$  (minor) = 15.8 min,  $t_R$  (major) = 20.0 min (Chiralpak IC,  $\lambda = 254$  nm, 10% *i*-PrOH/Hexane, flow rate = 1.0 mL/min).

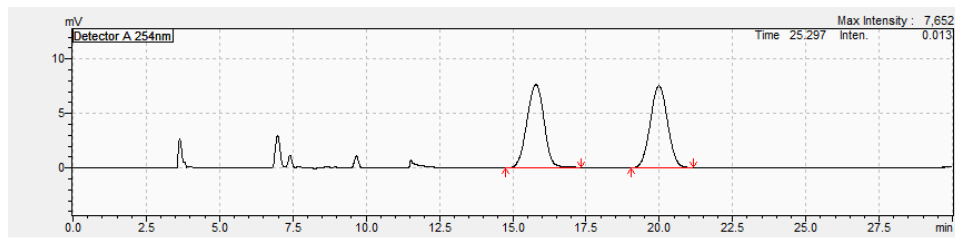

Results View - Peak Table

| Peak# | Ret. Time | Area   | Height | Conc.   | Unit | ID# | Name | Area%   |
|-------|-----------|--------|--------|---------|------|-----|------|---------|
| 1     | 15.793    | 311197 | 7629   | 50.284  |      |     |      | 50.284  |
| 2     | 19.988    | 307685 | 7521   | 49.716  |      |     |      | 49.716  |
| Total |           | 618882 | 15150  | 100.000 |      |     |      | 100.000 |

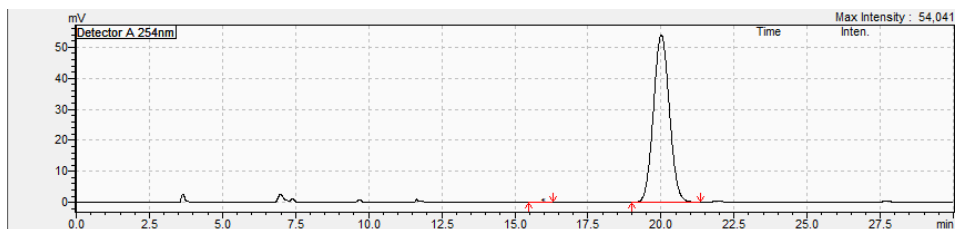

Results View - Peak Table

| Peak# | Ret. Time | Area    | Height | Conc.   | Unit | ID# | Name | Area%   |
|-------|-----------|---------|--------|---------|------|-----|------|---------|
| 1     | 15.800    | 2556    | 82     | 0.124   |      |     |      | 0.124   |
| 2     | 20.011    | 2060819 | 54064  | 99.876  |      |     |      | 99.876  |
| Total |           | 2063376 | 54146  | 100.000 |      |     |      | 100.000 |

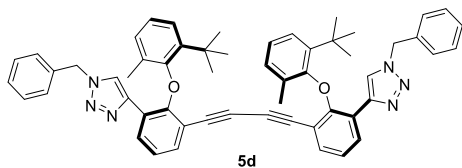

### 1,4-Bis(3-(1-benzyl-1H-1,2,3-triazol-4-yl)-2-(tert-butyl)-6-methylphenoxy)phenyl)buta-1,3-diyne (5d)

**3aa** (0.1 mmol, 1.0 equiv.), Pd(PPh<sub>3</sub>)<sub>2</sub>Cl<sub>2</sub> (0.01 mmol, 0.1 equiv.), and CuI (0.01 mmol, 0.1 equiv.) were added into a sealed tube. TEA (1 mL) and DMF (1 mL) was added into the mixture. The suspension was stirred at 60 °C for 12 h. After cooling to room temperature, the mixture was extracted with EtOAc and concentrated in vacuo to give a residue, which was purified by column to afford desired product 71% yield;  $[\alpha]_D^{25} = +60.2$  (c 0.5, CHCl<sub>3</sub>), a white foam,  $R_f = 0.30$  (hexane/ethyl acetate 8:1). <sup>1</sup>H NMR (400 MHz, CDCl<sub>3</sub>) δ 8.42 (dd,  $J = 7.8, 1.8$  Hz, 1H), 7.95 (s, 1H), 7.32 – 6.89 (m, 10H), 5.59 (d,  $J = 15.0$  Hz, 1H), 5.36 (d,  $J = 15.0$  Hz, 1H), 1.71 (s, 3H), 1.15 (s, 9H). <sup>13</sup>C NMR (101 MHz, CDCl<sub>3</sub>) δ 154.1, 152.2, 143.1, 142.0, 135.4, 134.7, 130.1, 129.3, 129.2, 129.1, 128.6, 127.9, 125.3, 125.1, 123.3, 122.1, 121.5, 110.5, 79.7, 77.8, 54.2, 35.1, 30.9, 17.2.

HRMS (ESI)  $m/z$  calcd for  $C_{56}H_{53}N_6O_2$   $[M+H]^+ = 841.4225$ , found = 841.4229; the ee value was 99%,  $t_R$  (minor) = 15.8 min,  $t_R$  (major) = 20.0 min (Chiralpak IE,  $\lambda = 254$  nm, 8% *i*-PrOH/Hexane, flow rate = 1.0 mL/min).

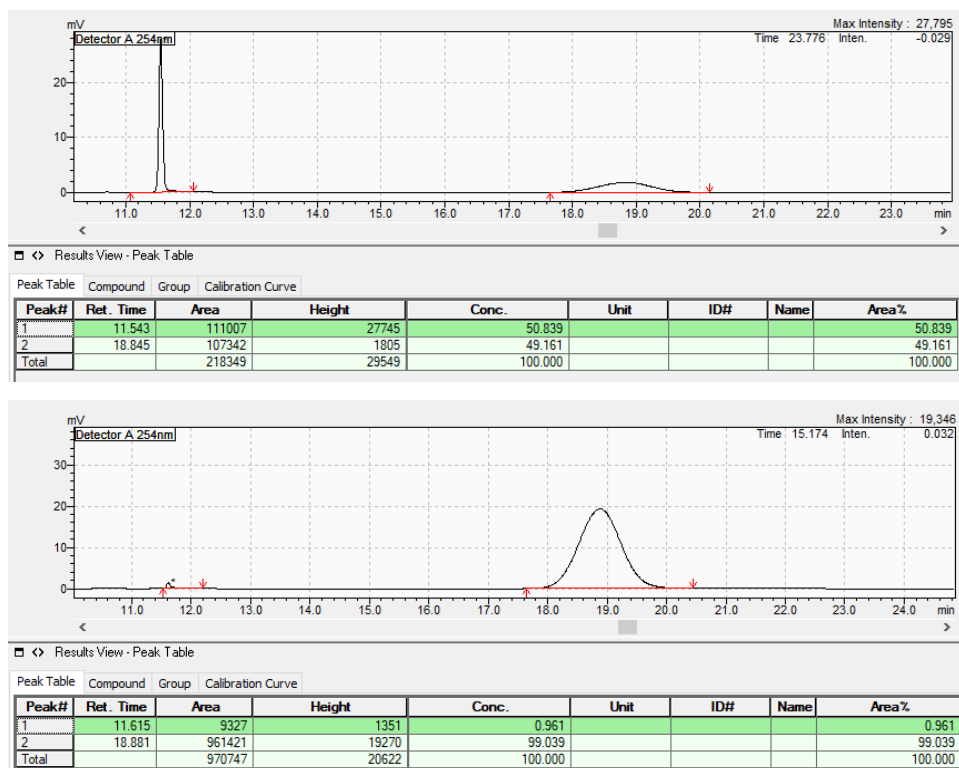

## 7. Mechanistic Studies

(1) Nonlinear relationship between the ee values of **3a** and **L1**

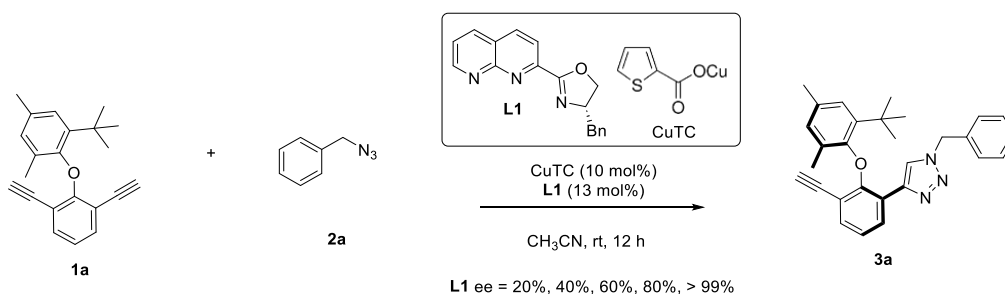

To a dried and argon-filled 10 mL Schlenk tube equipped with a magnetic stir bar was added CuTC (10 mol%) and **L1** (13 mol%) in  $\text{CH}_3\text{CN}$  (1.5 mL). The reaction mixture was stirred under at room temperature for 1 h. Then the solution of **1** (0.05 mmol, 1.0 equiv.) and **2** (0.09 mmol, 1.8 equiv.) in  $\text{CH}_3\text{CN}$  (0.5 mL) was added. The reaction mixture was stirred at room temperature for 12 h. The ee value was determined by HPLC analysis on a chiral-stationary-phase.



| ee of <b>L1</b> (%) | ee of <b>3a</b> (%) |
|---------------------|---------------------|
| 0                   | 0                   |
| 20                  | 29                  |
| 40                  | 51                  |
| 60                  | 69                  |
| 80                  | 84                  |
| 100                 | 98                  |

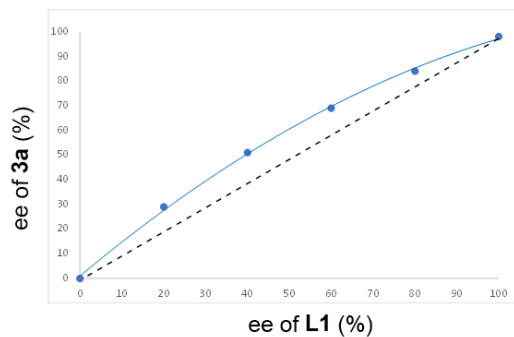

(2) Evidence for synergic desymmetrization and kinetic resolution.

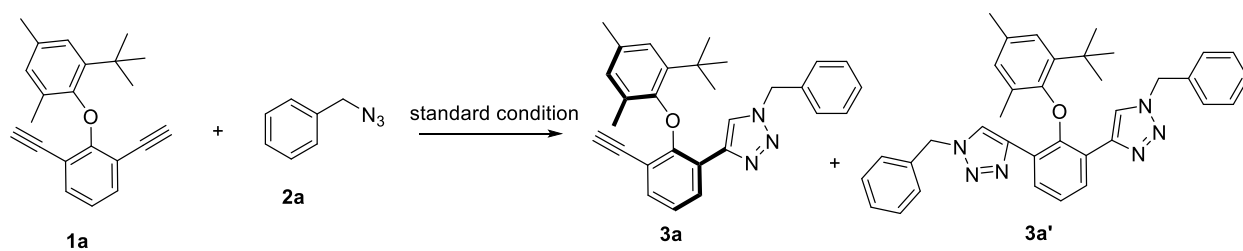

To a dried and argon-filled 10 mL Schlenk tube equipped with a magnetic stir bar was added CuTC (10 mol%) and **L1** (13 mol%) in CH<sub>3</sub>CN (1.5 mL). The reaction mixture was stirred under at room temperature for 1 h. Then the solution of **1** (0.05 mmol, 1.0 equiv.) and **2** (0.09 mmol, 1.8 equiv.) in CH<sub>3</sub>CN (0.5 mL) was added. The reaction mixture was stirred at room temperature. The yield and ee values were determined at specific time.

| entry | time | yield of <b>3a</b> | ee of <b>3a</b> |
|-------|------|--------------------|-----------------|
| 1     | 1h   | 99%                | 73%             |
| 2     | 2h   | 94%                | 76%             |
| 3     | 3h   | 87%                | 82%             |
| 4     | 4h   | 84%                | 87%             |
| 5     | 5h   | 82%                | 90%             |
| 6     | 6h   | 80%                | 92%             |
| 7     | 7h   | 78%                | 94%             |
| 8     | 8h   | 77%                | 96%             |
| 9     | 9h   | 76%                | 96%             |

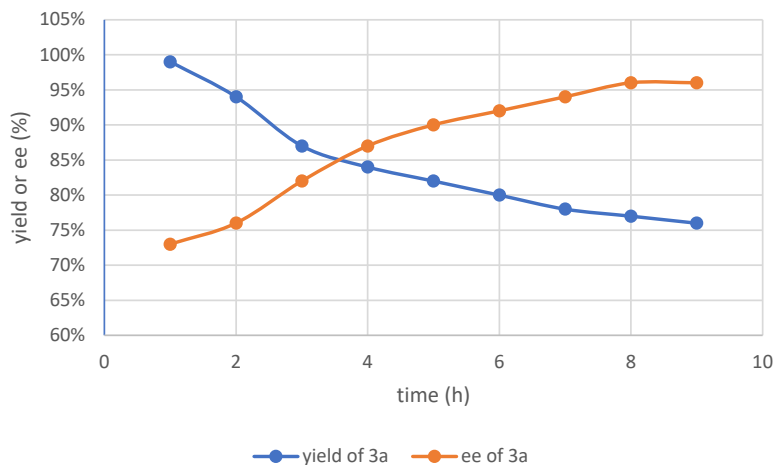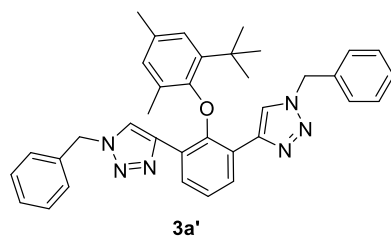

**4,4'-(2-(2-(*tert*-Butyl)-4,6-dimethylphenoxy)-1,3-phenylene)bis(1-benzyl-1H-1,2,3-triazole)  
(3a')**

$^1\text{H}$  NMR (400 MHz,  $\text{CDCl}_3$ )  $\delta$  7.85 (d,  $J = 7.7$  Hz, 2H), 7.29 – 7.23 (m, 6H), 7.19 (d,  $J = 1.6$  Hz, 1H), 7.15 – 7.08 (m, 4H), 6.82 (s, 2H), 6.66 – 6.54 (m, 2H), 5.36 (d,  $J = 14.8$  Hz, 2H), 5.16 (d,  $J = 14.8$  Hz, 2H), 2.21 (s, 3H), 1.67 (s, 4H), 0.83 (s, 10H).  $^{13}\text{C}$  NMR (101 MHz,  $\text{CDCl}_3$ )  $\delta$  152.8, 151.0, 143.9, 140.5, 134.5, 132.4, 131.5, 130.8, 129.0, 128.7, 128.1, 128.1, 126.3, 123.3, 122.9, 122.7, 53.9, 34.8, 30.4, 21.0, 18.0. HRMS (ESI)  $m/z$  calcd for  $\text{C}_{36}\text{H}_{37}\text{N}_6\text{O}$   $[\text{M}+\text{H}]^+ = 569.3023$ , found = 569.3028.

## 8. Single Crystal Structure X-ray Analysis of 3w

### Single Crystal Structure X-ray Analysis

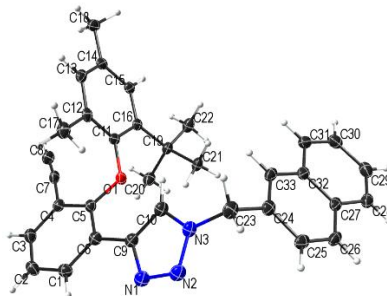

|                     |               |
|---------------------|---------------|
| Sample Code:        | N182          |
| Sample ID:          | DL-748        |
| Student/Researcher: | Dai Lei       |
| Supervisor:         | Prof Lu Yixin |
| CCDC                | 2322008       |
| Date:               | 15-5-2023     |

Note: The crystal is orthorhombic, space group  $P2(1)2(1)2(1)$ . The asymmetric unit contains one molecule of the compound  $C_{33}H_{31}N_3O$ .

As the Flack  $x = -0.055(211)$  by classical fit to all intensities and  $=0.026(20)$  from 2195 selected quotients by Parsons' method (in the LST file attached), the reported structure is the correct hand.

Final R values are  $R_1=0.0251$  and  $wR_2=0.0639$  for  $2-\theta$  up to  $144^\circ$ .

Table 1. Crystal data and structure refinement for N182.

|                                   |                                               |          |
|-----------------------------------|-----------------------------------------------|----------|
| Identification code               | N182                                          |          |
| Empirical formula                 | C33 H31 N3 O                                  |          |
| Formula weight                    | 485.61                                        |          |
| Temperature                       | 100(2) K                                      |          |
| Wavelength                        | 1.54178 Å                                     |          |
| Crystal system                    | Orthorhombic                                  |          |
| Space group                       | P2 <sub>1</sub> 2 <sub>1</sub> 2 <sub>1</sub> |          |
| Unit cell dimensions              | a = 7.8263(4) Å                               | α = 90°. |
|                                   | b = 11.6180(6) Å                              | β = 90°. |
|                                   | c = 28.9031(15) Å                             | γ = 90°. |
| Volume                            | 2628.0(2) Å <sup>3</sup>                      |          |
| Z                                 | 4                                             |          |
| Density (calculated)              | 1.227 Mg/m <sup>3</sup>                       |          |
| Absorption coefficient            | 0.580 mm <sup>-1</sup>                        |          |
| F(000)                            | 1032                                          |          |
| Crystal size                      | 0.251 x 0.146 x 0.063 mm <sup>3</sup>         |          |
| Theta range for data collection   | 3.058 to 72.293°.                             |          |
| Index ranges                      | -9<=h<=9, -14<=k<=14, -35<=l<=35              |          |
| Reflections collected             | 129942                                        |          |
| Independent reflections           | 5185 [R(int) = 0.0252]                        |          |
| Completeness to theta = 67.679°   | 100.0 %                                       |          |
| Absorption correction             | Semi-empirical from equivalents               |          |
| Max. and min. transmission        | 0.7536 and 0.6953                             |          |
| Refinement method                 | Full-matrix least-squares on F <sup>2</sup>   |          |
| Data / restraints / parameters    | 5185 / 0 / 339                                |          |
| Goodness-of-fit on F <sup>2</sup> | 1.067                                         |          |
| Final R indices [I>2sigma(I)]     | R1 = 0.0251, wR2 = 0.0637                     |          |
| R indices (all data)              | R1 = 0.0252, wR2 = 0.0639                     |          |
| Absolute structure parameter      | 0.03(2)                                       |          |
| Extinction coefficient            | n/a                                           |          |
| Largest diff. peak and hole       | 0.141 and -0.209 e.Å <sup>-3</sup>            |          |

Table 2. Atomic coordinates ( $\times 10^4$ ) and equivalent isotropic displacement parameters ( $\text{\AA}^2 \times 10^3$ ) for N182.  $U(\text{eq})$  is defined as one third of the trace of the orthogonalized  $U^{ij}$  tensor.

|       | x       | y        | z       | $U(\text{eq})$ |
|-------|---------|----------|---------|----------------|
| O(1)  | 5021(1) | 5059(1)  | 3506(1) | 19(1)          |
| N(1)  | 3496(2) | 8278(1)  | 3106(1) | 24(1)          |
| N(2)  | 4279(2) | 9073(1)  | 3350(1) | 24(1)          |
| N(3)  | 5499(2) | 8542(1)  | 3600(1) | 21(1)          |
| C(1)  | 2582(2) | 6307(1)  | 2565(1) | 22(1)          |
| C(2)  | 2043(2) | 5347(1)  | 2321(1) | 24(1)          |
| C(3)  | 2507(2) | 4258(1)  | 2469(1) | 22(1)          |
| C(4)  | 3518(2) | 4105(1)  | 2866(1) | 19(1)          |
| C(5)  | 4079(2) | 5086(1)  | 3104(1) | 17(1)          |
| C(6)  | 3611(2) | 6193(1)  | 2958(1) | 19(1)          |
| C(7)  | 3876(2) | 2942(1)  | 3009(1) | 20(1)          |
| C(8)  | 4044(2) | 1948(1)  | 3093(1) | 24(1)          |
| C(9)  | 4210(2) | 7232(1)  | 3200(1) | 19(1)          |
| C(10) | 5497(2) | 7400(1)  | 3519(1) | 20(1)          |
| C(11) | 6258(2) | 4216(1)  | 3588(1) | 16(1)          |
| C(12) | 7600(2) | 4081(1)  | 3273(1) | 19(1)          |
| C(13) | 8798(2) | 3224(1)  | 3364(1) | 20(1)          |
| C(14) | 8693(2) | 2536(1)  | 3755(1) | 19(1)          |
| C(15) | 7411(2) | 2772(1)  | 4079(1) | 18(1)          |
| C(16) | 6182(2) | 3629(1)  | 4011(1) | 16(1)          |
| C(17) | 7786(2) | 4849(1)  | 2854(1) | 24(1)          |
| C(18) | 9945(2) | 1567(1)  | 3835(1) | 24(1)          |
| C(19) | 4825(2) | 3910(1)  | 4379(1) | 18(1)          |
| C(20) | 3049(2) | 3557(1)  | 4203(1) | 25(1)          |
| C(21) | 4847(2) | 5200(1)  | 4505(1) | 21(1)          |
| C(22) | 5159(2) | 3256(1)  | 4833(1) | 24(1)          |
| C(23) | 6610(2) | 9200(1)  | 3910(1) | 24(1)          |
| C(24) | 6073(2) | 9126(1)  | 4413(1) | 21(1)          |
| C(25) | 5083(2) | 10023(1) | 4609(1) | 23(1)          |
| C(26) | 4653(2) | 10004(1) | 5068(1) | 23(1)          |
| C(27) | 5154(2) | 9080(1)  | 5357(1) | 21(1)          |

|       |         |         |         |       |
|-------|---------|---------|---------|-------|
| C(28) | 4782(2) | 9059(1) | 5839(1) | 25(1) |
| C(29) | 5306(2) | 8155(1) | 6107(1) | 28(1) |
| C(30) | 6205(2) | 7223(1) | 5909(1) | 28(1) |
| C(31) | 6600(2) | 7226(1) | 5447(1) | 24(1) |
| C(32) | 6097(2) | 8156(1) | 5160(1) | 20(1) |
| C(33) | 6561(2) | 8216(1) | 4685(1) | 21(1) |

---

Table 3. Bond lengths [ $\text{\AA}$ ] and angles [ $^\circ$ ] for N182.

---

|              |            |
|--------------|------------|
| O(1)-C(5)    | 1.3761(15) |
| O(1)-C(11)   | 1.3970(16) |
| N(1)-N(2)    | 1.3143(18) |
| N(1)-C(9)    | 1.3646(18) |
| N(2)-N(3)    | 1.3456(18) |
| N(3)-C(10)   | 1.3470(17) |
| N(3)-C(23)   | 1.4646(18) |
| C(1)-C(2)    | 1.384(2)   |
| C(1)-C(6)    | 1.3981(19) |
| C(1)-H(1)    | 0.9500     |
| C(2)-C(3)    | 1.384(2)   |
| C(2)-H(2)    | 0.9500     |
| C(3)-C(4)    | 1.405(2)   |
| C(3)-H(3)    | 0.9500     |
| C(4)-C(5)    | 1.4027(19) |
| C(4)-C(7)    | 1.4395(19) |
| C(5)-C(6)    | 1.4022(18) |
| C(6)-C(9)    | 1.4727(18) |
| C(7)-C(8)    | 1.188(2)   |
| C(8)-H(8)    | 0.9500     |
| C(9)-C(10)   | 1.380(2)   |
| C(10)-H(10)  | 0.9500     |
| C(11)-C(12)  | 1.3979(18) |
| C(11)-C(16)  | 1.4023(18) |
| C(12)-C(13)  | 1.392(2)   |
| C(12)-C(17)  | 1.5108(18) |
| C(13)-C(14)  | 1.388(2)   |
| C(13)-H(13)  | 0.9500     |
| C(14)-C(15)  | 1.3995(19) |
| C(14)-C(18)  | 1.5099(19) |
| C(15)-C(16)  | 1.3977(19) |
| C(15)-H(15)  | 0.9500     |
| C(16)-C(19)  | 1.5386(17) |
| C(17)-H(17A) | 0.9800     |

|              |            |
|--------------|------------|
| C(17)-H(17B) | 0.9800     |
| C(17)-H(17C) | 0.9800     |
| C(18)-H(18A) | 0.9800     |
| C(18)-H(18B) | 0.9800     |
| C(18)-H(18C) | 0.9800     |
| C(19)-C(20)  | 1.5363(19) |
| C(19)-C(22)  | 1.5385(18) |
| C(19)-C(21)  | 1.5419(17) |
| C(20)-H(20A) | 0.9800     |
| C(20)-H(20B) | 0.9800     |
| C(20)-H(20C) | 0.9800     |
| C(21)-H(21A) | 0.9800     |
| C(21)-H(21B) | 0.9800     |
| C(21)-H(21C) | 0.9800     |
| C(22)-H(22A) | 0.9800     |
| C(22)-H(22B) | 0.9800     |
| C(22)-H(22C) | 0.9800     |
| C(23)-C(24)  | 1.5145(19) |
| C(23)-H(23A) | 0.9900     |
| C(23)-H(23B) | 0.9900     |
| C(24)-C(33)  | 1.371(2)   |
| C(24)-C(25)  | 1.4172(19) |
| C(25)-C(26)  | 1.371(2)   |
| C(25)-H(25)  | 0.9500     |
| C(26)-C(27)  | 1.415(2)   |
| C(26)-H(26)  | 0.9500     |
| C(27)-C(32)  | 1.4223(19) |
| C(27)-C(28)  | 1.4225(19) |
| C(28)-C(29)  | 1.370(2)   |
| C(28)-H(28)  | 0.9500     |
| C(29)-C(30)  | 1.412(2)   |
| C(29)-H(29)  | 0.9500     |
| C(30)-C(31)  | 1.372(2)   |
| C(30)-H(30)  | 0.9500     |
| C(31)-C(32)  | 1.418(2)   |
| C(31)-H(31)  | 0.9500     |



|                  |            |
|------------------|------------|
| C(32)-C(33)      | 1.4211(19) |
| C(33)-H(33)      | 0.9500     |
| C(5)-O(1)-C(11)  | 121.97(10) |
| N(2)-N(1)-C(9)   | 109.16(12) |
| N(1)-N(2)-N(3)   | 107.22(11) |
| N(2)-N(3)-C(10)  | 111.01(12) |
| N(2)-N(3)-C(23)  | 120.64(11) |
| C(10)-N(3)-C(23) | 128.34(13) |
| C(2)-C(1)-C(6)   | 120.81(13) |
| C(2)-C(1)-H(1)   | 119.6      |
| C(6)-C(1)-H(1)   | 119.6      |
| C(3)-C(2)-C(1)   | 119.96(13) |
| C(3)-C(2)-H(2)   | 120.0      |
| C(1)-C(2)-H(2)   | 120.0      |
| C(2)-C(3)-C(4)   | 121.06(13) |
| C(2)-C(3)-H(3)   | 119.5      |
| C(4)-C(3)-H(3)   | 119.5      |
| C(5)-C(4)-C(3)   | 118.28(12) |
| C(5)-C(4)-C(7)   | 124.15(12) |
| C(3)-C(4)-C(7)   | 117.55(12) |
| O(1)-C(5)-C(6)   | 114.62(11) |
| O(1)-C(5)-C(4)   | 124.26(12) |
| C(6)-C(5)-C(4)   | 121.01(12) |
| C(1)-C(6)-C(5)   | 118.87(12) |
| C(1)-C(6)-C(9)   | 119.45(12) |
| C(5)-C(6)-C(9)   | 121.66(12) |
| C(8)-C(7)-C(4)   | 172.96(15) |
| C(7)-C(8)-H(8)   | 180.0      |
| N(1)-C(9)-C(10)  | 107.81(12) |
| N(1)-C(9)-C(6)   | 120.36(12) |
| C(10)-C(9)-C(6)  | 131.78(12) |
| N(3)-C(10)-C(9)  | 104.80(12) |
| N(3)-C(10)-H(10) | 127.6      |
| C(9)-C(10)-H(10) | 127.6      |
| O(1)-C(11)-C(12) | 119.35(11) |

|                     |            |
|---------------------|------------|
| O(1)-C(11)-C(16)    | 117.27(11) |
| C(12)-C(11)-C(16)   | 123.01(12) |
| C(13)-C(12)-C(11)   | 117.66(12) |
| C(13)-C(12)-C(17)   | 120.54(12) |
| C(11)-C(12)-C(17)   | 121.78(12) |
| C(14)-C(13)-C(12)   | 121.68(12) |
| C(14)-C(13)-H(13)   | 119.2      |
| C(12)-C(13)-H(13)   | 119.2      |
| C(13)-C(14)-C(15)   | 118.31(12) |
| C(13)-C(14)-C(18)   | 121.08(13) |
| C(15)-C(14)-C(18)   | 120.61(12) |
| C(16)-C(15)-C(14)   | 122.67(12) |
| C(16)-C(15)-H(15)   | 118.7      |
| C(14)-C(15)-H(15)   | 118.7      |
| C(15)-C(16)-C(11)   | 116.05(12) |
| C(15)-C(16)-C(19)   | 121.94(11) |
| C(11)-C(16)-C(19)   | 122.01(12) |
| C(12)-C(17)-H(17A)  | 109.5      |
| C(12)-C(17)-H(17B)  | 109.5      |
| H(17A)-C(17)-H(17B) | 109.5      |
| C(12)-C(17)-H(17C)  | 109.5      |
| H(17A)-C(17)-H(17C) | 109.5      |
| H(17B)-C(17)-H(17C) | 109.5      |
| C(14)-C(18)-H(18A)  | 109.5      |
| C(14)-C(18)-H(18B)  | 109.5      |
| H(18A)-C(18)-H(18B) | 109.5      |
| C(14)-C(18)-H(18C)  | 109.5      |
| H(18A)-C(18)-H(18C) | 109.5      |
| H(18B)-C(18)-H(18C) | 109.5      |
| C(20)-C(19)-C(22)   | 107.77(11) |
| C(20)-C(19)-C(16)   | 109.76(10) |
| C(22)-C(19)-C(16)   | 111.58(11) |
| C(20)-C(19)-C(21)   | 110.34(11) |
| C(22)-C(19)-C(21)   | 106.07(10) |
| C(16)-C(19)-C(21)   | 111.21(11) |
| C(19)-C(20)-H(20A)  | 109.5      |

|                     |            |
|---------------------|------------|
| C(19)-C(20)-H(20B)  | 109.5      |
| H(20A)-C(20)-H(20B) | 109.5      |
| C(19)-C(20)-H(20C)  | 109.5      |
| H(20A)-C(20)-H(20C) | 109.5      |
| H(20B)-C(20)-H(20C) | 109.5      |
| C(19)-C(21)-H(21A)  | 109.5      |
| C(19)-C(21)-H(21B)  | 109.5      |
| H(21A)-C(21)-H(21B) | 109.5      |
| C(19)-C(21)-H(21C)  | 109.5      |
| H(21A)-C(21)-H(21C) | 109.5      |
| H(21B)-C(21)-H(21C) | 109.5      |
| C(19)-C(22)-H(22A)  | 109.5      |
| C(19)-C(22)-H(22B)  | 109.5      |
| H(22A)-C(22)-H(22B) | 109.5      |
| C(19)-C(22)-H(22C)  | 109.5      |
| H(22A)-C(22)-H(22C) | 109.5      |
| H(22B)-C(22)-H(22C) | 109.5      |
| N(3)-C(23)-C(24)    | 113.16(11) |
| N(3)-C(23)-H(23A)   | 108.9      |
| C(24)-C(23)-H(23A)  | 108.9      |
| N(3)-C(23)-H(23B)   | 108.9      |
| C(24)-C(23)-H(23B)  | 108.9      |
| H(23A)-C(23)-H(23B) | 107.8      |
| C(33)-C(24)-C(25)   | 119.33(13) |
| C(33)-C(24)-C(23)   | 121.12(12) |
| C(25)-C(24)-C(23)   | 119.53(13) |
| C(26)-C(25)-C(24)   | 120.61(13) |
| C(26)-C(25)-H(25)   | 119.7      |
| C(24)-C(25)-H(25)   | 119.7      |
| C(25)-C(26)-C(27)   | 121.09(13) |
| C(25)-C(26)-H(26)   | 119.5      |
| C(27)-C(26)-H(26)   | 119.5      |
| C(26)-C(27)-C(32)   | 118.66(12) |
| C(26)-C(27)-C(28)   | 122.25(13) |
| C(32)-C(27)-C(28)   | 119.08(13) |
| C(29)-C(28)-C(27)   | 120.45(13) |

|                   |            |
|-------------------|------------|
| C(29)-C(28)-H(28) | 119.8      |
| C(27)-C(28)-H(28) | 119.8      |
| C(28)-C(29)-C(30) | 120.48(14) |
| C(28)-C(29)-H(29) | 119.8      |
| C(30)-C(29)-H(29) | 119.8      |
| C(31)-C(30)-C(29) | 120.34(14) |
| C(31)-C(30)-H(30) | 119.8      |
| C(29)-C(30)-H(30) | 119.8      |
| C(30)-C(31)-C(32) | 120.66(13) |
| C(30)-C(31)-H(31) | 119.7      |
| C(32)-C(31)-H(31) | 119.7      |
| C(31)-C(32)-C(33) | 122.13(13) |
| C(31)-C(32)-C(27) | 118.96(13) |
| C(33)-C(32)-C(27) | 118.86(13) |
| C(24)-C(33)-C(32) | 121.38(12) |
| C(24)-C(33)-H(33) | 119.3      |
| C(32)-C(33)-H(33) | 119.3      |

---

Symmetry transformations used to generate equivalent atoms:

Table 4. Anisotropic displacement parameters ( $\text{\AA}^2 \times 10^3$ ) for N182. The anisotropic displacement factor exponent takes the form:  $-2\pi^2 [ h^2 a^{*2} U^{11} + \dots + 2 h k a^* b^* U^{12} ]$

|       | U <sup>11</sup> | U <sup>22</sup> | U <sup>33</sup> | U <sup>23</sup> | U <sup>13</sup> | U <sup>12</sup> |
|-------|-----------------|-----------------|-----------------|-----------------|-----------------|-----------------|
| O(1)  | 25(1)           | 16(1)           | 16(1)           | -1(1)           | -3(1)           | 2(1)            |
| N(1)  | 29(1)           | 19(1)           | 22(1)           | 4(1)            | 1(1)            | 1(1)            |
| N(2)  | 31(1)           | 17(1)           | 24(1)           | 4(1)            | 3(1)            | 2(1)            |
| N(3)  | 26(1)           | 16(1)           | 21(1)           | 1(1)            | 3(1)            | -2(1)           |
| C(1)  | 22(1)           | 24(1)           | 20(1)           | 5(1)            | 2(1)            | 1(1)            |
| C(2)  | 23(1)           | 33(1)           | 18(1)           | 2(1)            | -2(1)           | -2(1)           |
| C(3)  | 21(1)           | 27(1)           | 20(1)           | -4(1)           | 1(1)            | -4(1)           |
| C(4)  | 19(1)           | 19(1)           | 18(1)           | -1(1)           | 4(1)            | -1(1)           |
| C(5)  | 18(1)           | 20(1)           | 14(1)           | 1(1)            | 2(1)            | -1(1)           |
| C(6)  | 20(1)           | 19(1)           | 18(1)           | 2(1)            | 3(1)            | -1(1)           |
| C(7)  | 21(1)           | 22(1)           | 18(1)           | -5(1)           | 1(1)            | -2(1)           |
| C(8)  | 27(1)           | 20(1)           | 25(1)           | -4(1)           | 1(1)            | -1(1)           |
| C(9)  | 23(1)           | 16(1)           | 17(1)           | 4(1)            | 4(1)            | 0(1)            |
| C(10) | 25(1)           | 15(1)           | 21(1)           | 1(1)            | 3(1)            | -1(1)           |
| C(11) | 17(1)           | 12(1)           | 18(1)           | -2(1)           | -2(1)           | -1(1)           |
| C(12) | 21(1)           | 19(1)           | 16(1)           | -4(1)           | 0(1)            | -6(1)           |
| C(13) | 17(1)           | 24(1)           | 20(1)           | -7(1)           | 2(1)            | -4(1)           |
| C(14) | 16(1)           | 20(1)           | 22(1)           | -6(1)           | -4(1)           | -2(1)           |
| C(15) | 20(1)           | 16(1)           | 17(1)           | -2(1)           | -2(1)           | -2(1)           |
| C(16) | 18(1)           | 14(1)           | 17(1)           | -3(1)           | 0(1)            | -4(1)           |
| C(17) | 26(1)           | 27(1)           | 19(1)           | 1(1)            | 5(1)            | -4(1)           |
| C(18) | 20(1)           | 23(1)           | 29(1)           | -6(1)           | -3(1)           | 2(1)            |
| C(19) | 20(1)           | 16(1)           | 18(1)           | -1(1)           | 4(1)            | -1(1)           |
| C(20) | 20(1)           | 29(1)           | 28(1)           | -6(1)           | 5(1)            | -4(1)           |
| C(21) | 27(1)           | 17(1)           | 19(1)           | -3(1)           | 3(1)            | 2(1)            |
| C(22) | 33(1)           | 20(1)           | 20(1)           | 2(1)            | 6(1)            | 0(1)            |
| C(23) | 26(1)           | 16(1)           | 28(1)           | -2(1)           | 3(1)            | -5(1)           |
| C(24) | 20(1)           | 17(1)           | 26(1)           | -4(1)           | 0(1)            | -5(1)           |
| C(25) | 23(1)           | 14(1)           | 31(1)           | -2(1)           | -2(1)           | -1(1)           |
| C(26) | 20(1)           | 16(1)           | 32(1)           | -7(1)           | 1(1)            | 1(1)            |
| C(27) | 16(1)           | 19(1)           | 27(1)           | -7(1)           | -1(1)           | -4(1)           |

|       |       |       |       |       |       |       |
|-------|-------|-------|-------|-------|-------|-------|
| C(28) | 20(1) | 26(1) | 28(1) | -9(1) | 0(1)  | -1(1) |
| C(29) | 26(1) | 36(1) | 23(1) | -5(1) | -1(1) | -4(1) |
| C(30) | 27(1) | 28(1) | 28(1) | 1(1)  | -7(1) | -1(1) |
| C(31) | 22(1) | 22(1) | 29(1) | -4(1) | -4(1) | 3(1)  |
| C(32) | 17(1) | 18(1) | 26(1) | -6(1) | -2(1) | -2(1) |
| C(33) | 19(1) | 16(1) | 27(1) | -7(1) | 1(1)  | 0(1)  |

---

Table 5. Hydrogen coordinates ( $\times 10^4$ ) and isotropic displacement parameters ( $\text{\AA}^2 \times 10^{-3}$ ) for N182.

|        | x     | y     | z    | U(eq) |
|--------|-------|-------|------|-------|
| H(1)   | 2247  | 7052  | 2464 | 27    |
| H(2)   | 1356  | 5436  | 2053 | 29    |
| H(3)   | 2136  | 3604  | 2300 | 27    |
| H(8)   | 4178  | 1152  | 3160 | 29    |
| H(10)  | 6223  | 6835  | 3653 | 24    |
| H(13)  | 9711  | 3107  | 3152 | 24    |
| H(15)  | 7374  | 2333  | 4356 | 21    |
| H(17A) | 8987  | 4872  | 2759 | 36    |
| H(17B) | 7401  | 5628  | 2932 | 36    |
| H(17C) | 7090  | 4544  | 2600 | 36    |
| H(18A) | 10379 | 1608  | 4153 | 36    |
| H(18B) | 10899 | 1638  | 3618 | 36    |
| H(18C) | 9369  | 828   | 3788 | 36    |
| H(20A) | 2204  | 3674  | 4448 | 38    |
| H(20B) | 3065  | 2744  | 4113 | 38    |
| H(20C) | 2746  | 4029  | 3934 | 38    |
| H(21A) | 4110  | 5332  | 4774 | 32    |
| H(21B) | 4427  | 5651  | 4242 | 32    |
| H(21C) | 6018  | 5435  | 4579 | 32    |
| H(22A) | 4290  | 3468  | 5062 | 36    |
| H(22B) | 6294  | 3458  | 4952 | 36    |
| H(22C) | 5107  | 2426  | 4775 | 36    |
| H(23A) | 6604  | 10017 | 3813 | 28    |
| H(23B) | 7794  | 8911  | 3880 | 28    |
| H(25)  | 4715  | 10645 | 4420 | 27    |
| H(26)  | 4008  | 10620 | 5195 | 27    |
| H(28)  | 4165  | 9677  | 5975 | 30    |
| H(29)  | 5063  | 8154  | 6429 | 34    |
| H(30)  | 6539  | 6591  | 6097 | 33    |
| H(31)  | 7216  | 6599  | 5318 | 29    |

H(33)

7223

7614

4553

25

---



Table 6. Torsion angles [°] for N182.

---

|                         |             |
|-------------------------|-------------|
| C(9)-N(1)-N(2)-N(3)     | 0.20(14)    |
| N(1)-N(2)-N(3)-C(10)    | -0.44(15)   |
| N(1)-N(2)-N(3)-C(23)    | 179.90(11)  |
| C(6)-C(1)-C(2)-C(3)     | 0.8(2)      |
| C(1)-C(2)-C(3)-C(4)     | 0.2(2)      |
| C(2)-C(3)-C(4)-C(5)     | -1.4(2)     |
| C(2)-C(3)-C(4)-C(7)     | 177.16(13)  |
| C(11)-O(1)-C(5)-C(6)    | -148.01(11) |
| C(11)-O(1)-C(5)-C(4)    | 35.80(18)   |
| C(3)-C(4)-C(5)-O(1)     | 177.55(12)  |
| C(7)-C(4)-C(5)-O(1)     | -0.9(2)     |
| C(3)-C(4)-C(5)-C(6)     | 1.59(19)    |
| C(7)-C(4)-C(5)-C(6)     | -176.86(13) |
| C(2)-C(1)-C(6)-C(5)     | -0.6(2)     |
| C(2)-C(1)-C(6)-C(9)     | 177.91(13)  |
| O(1)-C(5)-C(6)-C(1)     | -176.94(12) |
| C(4)-C(5)-C(6)-C(1)     | -0.62(19)   |
| O(1)-C(5)-C(6)-C(9)     | 4.58(18)    |
| C(4)-C(5)-C(6)-C(9)     | -179.09(13) |
| N(2)-N(1)-C(9)-C(10)    | 0.10(15)    |
| N(2)-N(1)-C(9)-C(6)     | -177.70(12) |
| C(1)-C(6)-C(9)-N(1)     | 13.73(19)   |
| C(5)-C(6)-C(9)-N(1)     | -167.80(12) |
| C(1)-C(6)-C(9)-C(10)    | -163.45(14) |
| C(5)-C(6)-C(9)-C(10)    | 15.0(2)     |
| N(2)-N(3)-C(10)-C(9)    | 0.49(15)    |
| C(23)-N(3)-C(10)-C(9)   | -179.88(12) |
| N(1)-C(9)-C(10)-N(3)    | -0.35(15)   |
| C(6)-C(9)-C(10)-N(3)    | 177.10(13)  |
| C(5)-O(1)-C(11)-C(12)   | 56.98(16)   |
| C(5)-O(1)-C(11)-C(16)   | -129.82(12) |
| O(1)-C(11)-C(12)-C(13)  | -179.38(11) |
| C(16)-C(11)-C(12)-C(13) | 7.84(19)    |
| O(1)-C(11)-C(12)-C(17)  | 2.03(18)    |

|                         |             |
|-------------------------|-------------|
| C(16)-C(11)-C(12)-C(17) | -170.76(12) |
| C(11)-C(12)-C(13)-C(14) | -1.07(19)   |
| C(17)-C(12)-C(13)-C(14) | 177.54(12)  |
| C(12)-C(13)-C(14)-C(15) | -4.41(19)   |
| C(12)-C(13)-C(14)-C(18) | 176.61(12)  |
| C(13)-C(14)-C(15)-C(16) | 3.62(19)    |
| C(18)-C(14)-C(15)-C(16) | -177.39(12) |
| C(14)-C(15)-C(16)-C(11) | 2.58(18)    |
| C(14)-C(15)-C(16)-C(19) | -177.53(12) |
| O(1)-C(11)-C(16)-C(15)  | 178.59(10)  |
| C(12)-C(11)-C(16)-C(15) | -8.48(18)   |
| O(1)-C(11)-C(16)-C(19)  | -1.30(17)   |
| C(12)-C(11)-C(16)-C(19) | 171.62(12)  |
| C(15)-C(16)-C(19)-C(20) | -112.07(14) |
| C(11)-C(16)-C(19)-C(20) | 67.82(15)   |
| C(15)-C(16)-C(19)-C(22) | 7.34(17)    |
| C(11)-C(16)-C(19)-C(22) | -172.78(12) |
| C(15)-C(16)-C(19)-C(21) | 125.55(13)  |
| C(11)-C(16)-C(19)-C(21) | -54.56(16)  |
| N(2)-N(3)-C(23)-C(24)   | 100.35(15)  |
| C(10)-N(3)-C(23)-C(24)  | -79.25(18)  |
| N(3)-C(23)-C(24)-C(33)  | 83.52(17)   |
| N(3)-C(23)-C(24)-C(25)  | -97.93(15)  |
| C(33)-C(24)-C(25)-C(26) | 1.8(2)      |
| C(23)-C(24)-C(25)-C(26) | -176.79(13) |
| C(24)-C(25)-C(26)-C(27) | -1.2(2)     |
| C(25)-C(26)-C(27)-C(32) | -1.0(2)     |
| C(25)-C(26)-C(27)-C(28) | 177.54(13)  |
| C(26)-C(27)-C(28)-C(29) | -179.27(14) |
| C(32)-C(27)-C(28)-C(29) | -0.8(2)     |
| C(27)-C(28)-C(29)-C(30) | -0.8(2)     |
| C(28)-C(29)-C(30)-C(31) | 1.5(2)      |
| C(29)-C(30)-C(31)-C(32) | -0.7(2)     |
| C(30)-C(31)-C(32)-C(33) | 176.64(13)  |
| C(30)-C(31)-C(32)-C(27) | -0.9(2)     |
| C(26)-C(27)-C(32)-C(31) | -179.83(12) |

|                         |             |
|-------------------------|-------------|
| C(28)-C(27)-C(32)-C(31) | 1.62(19)    |
| C(26)-C(27)-C(32)-C(33) | 2.54(19)    |
| C(28)-C(27)-C(32)-C(33) | -176.01(12) |
| C(25)-C(24)-C(33)-C(32) | -0.1(2)     |
| C(23)-C(24)-C(33)-C(32) | 178.42(12)  |
| C(31)-C(32)-C(33)-C(24) | -179.57(13) |
| C(27)-C(32)-C(33)-C(24) | -2.0(2)     |

---

Symmetry transformations used to generate equivalent atoms:

## 9. NMR Spectra

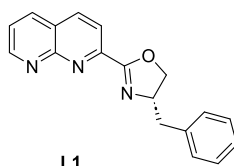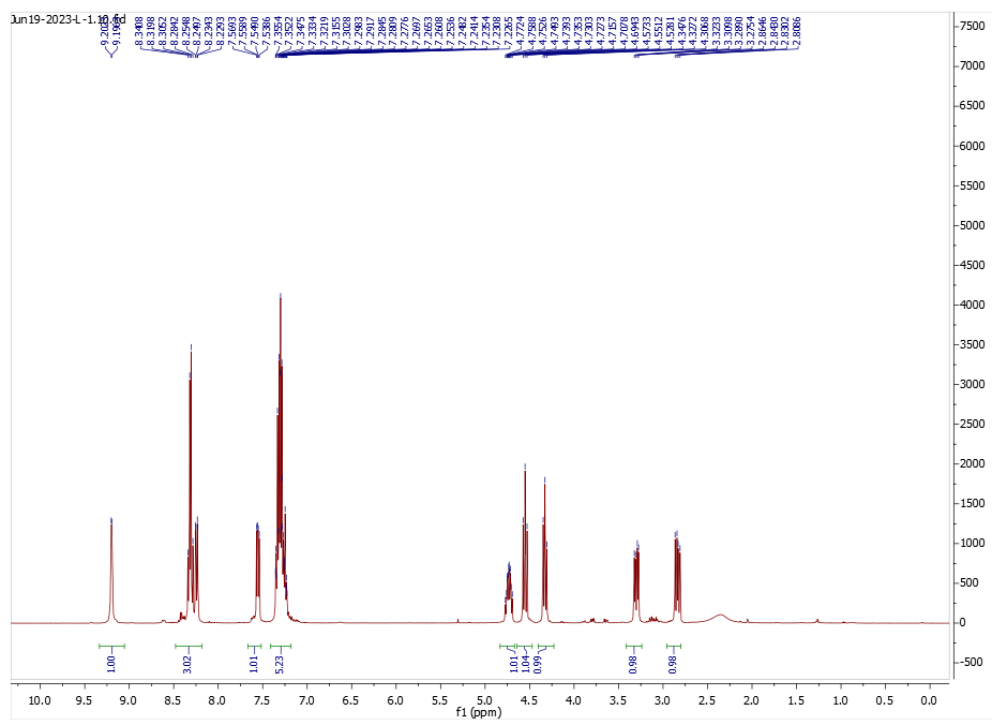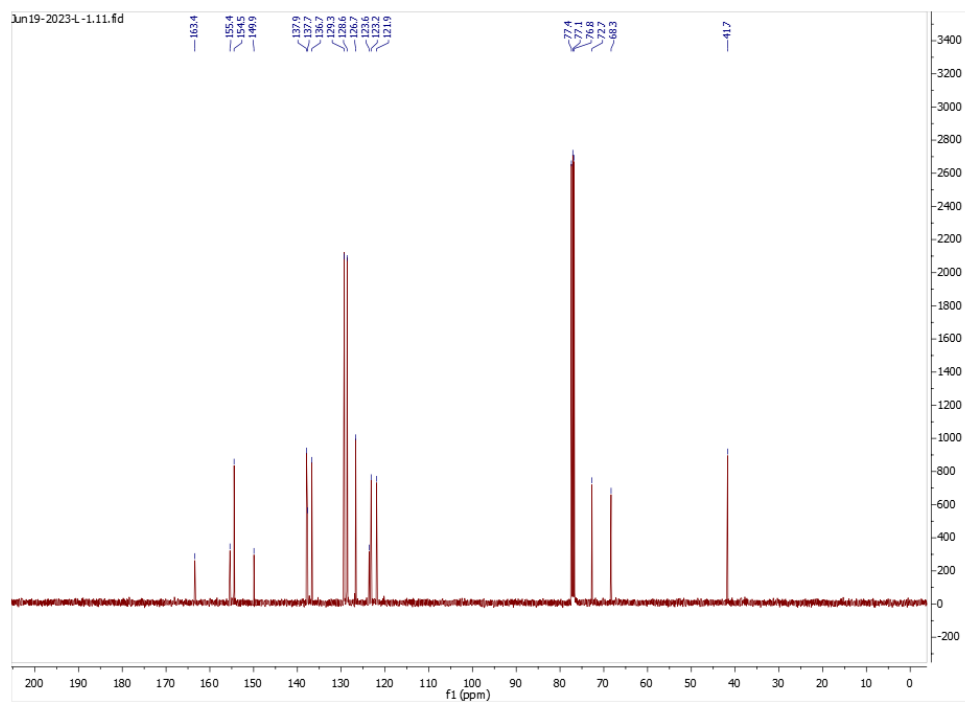

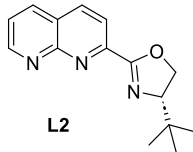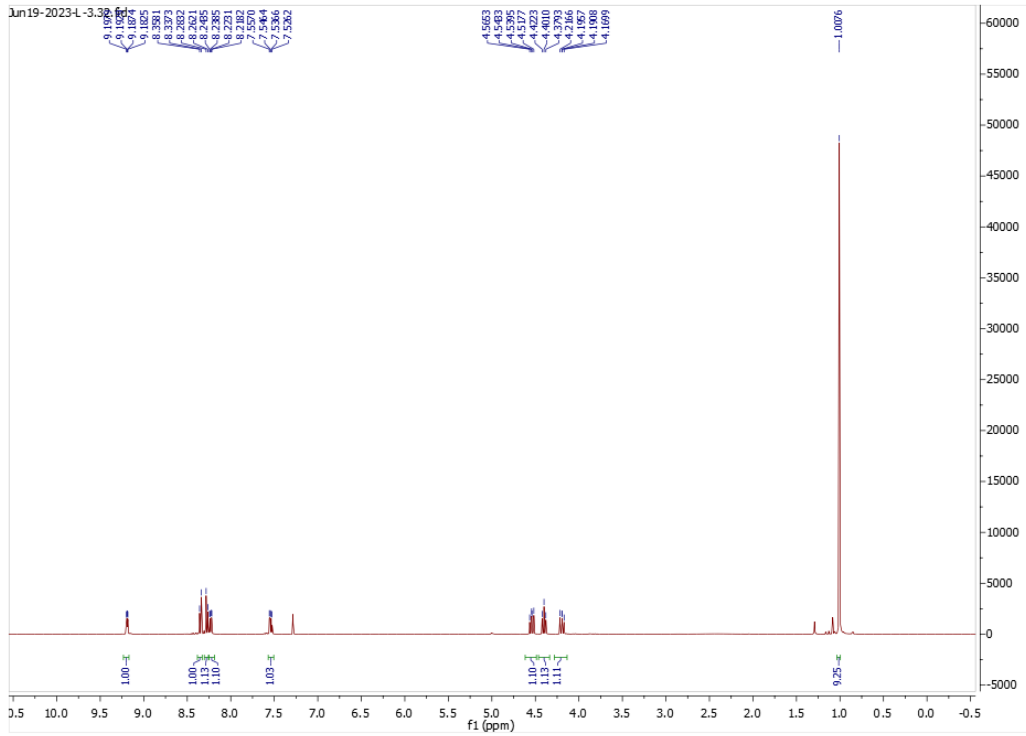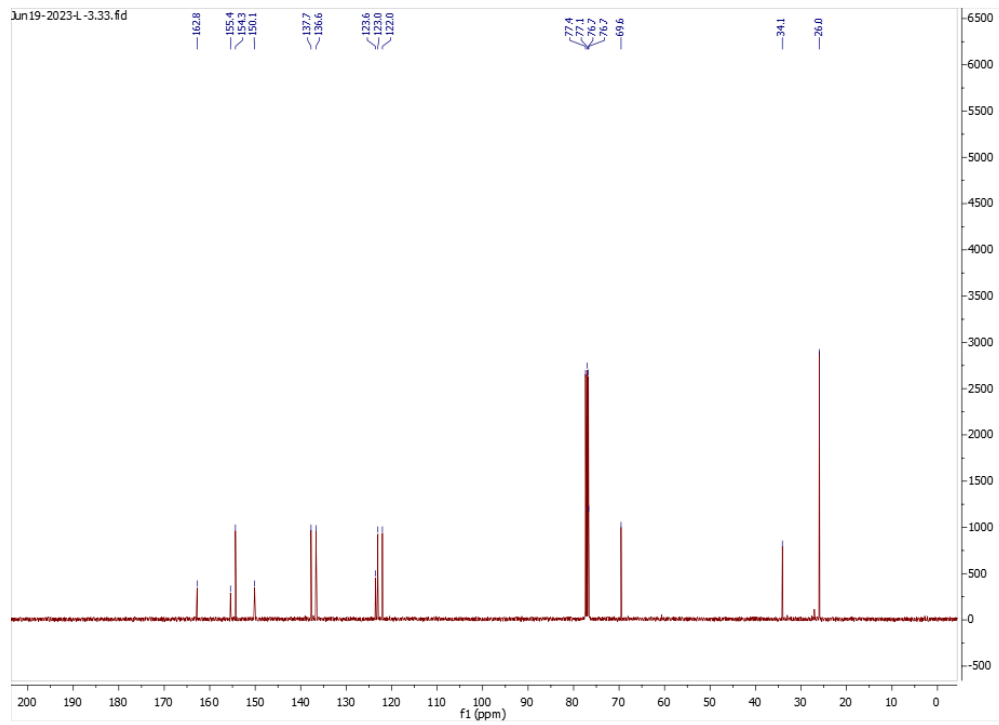

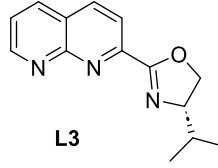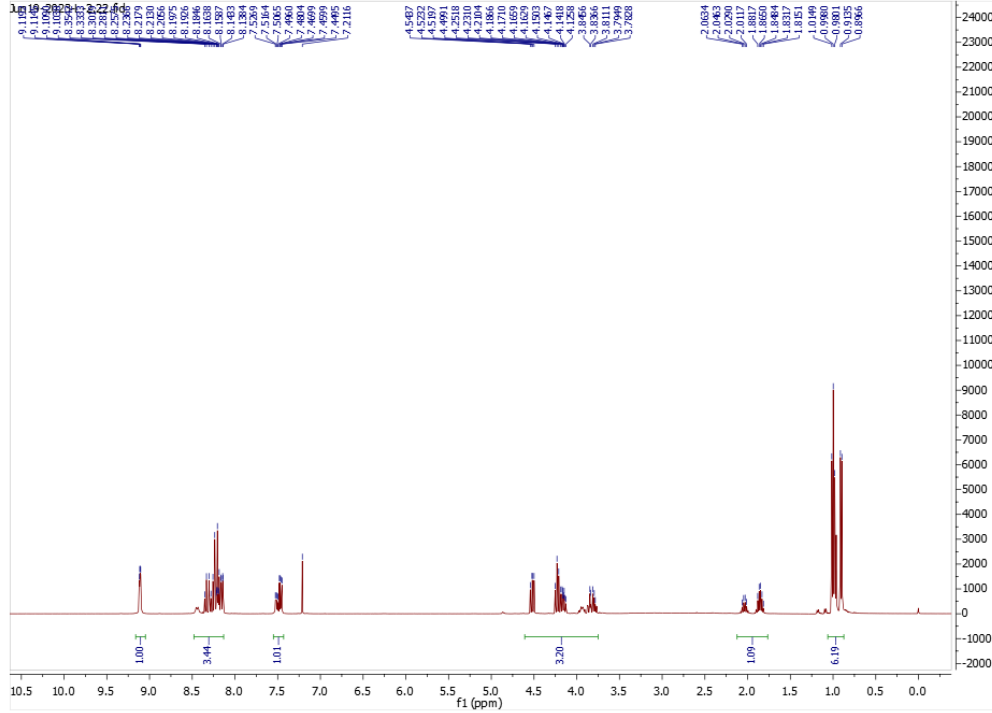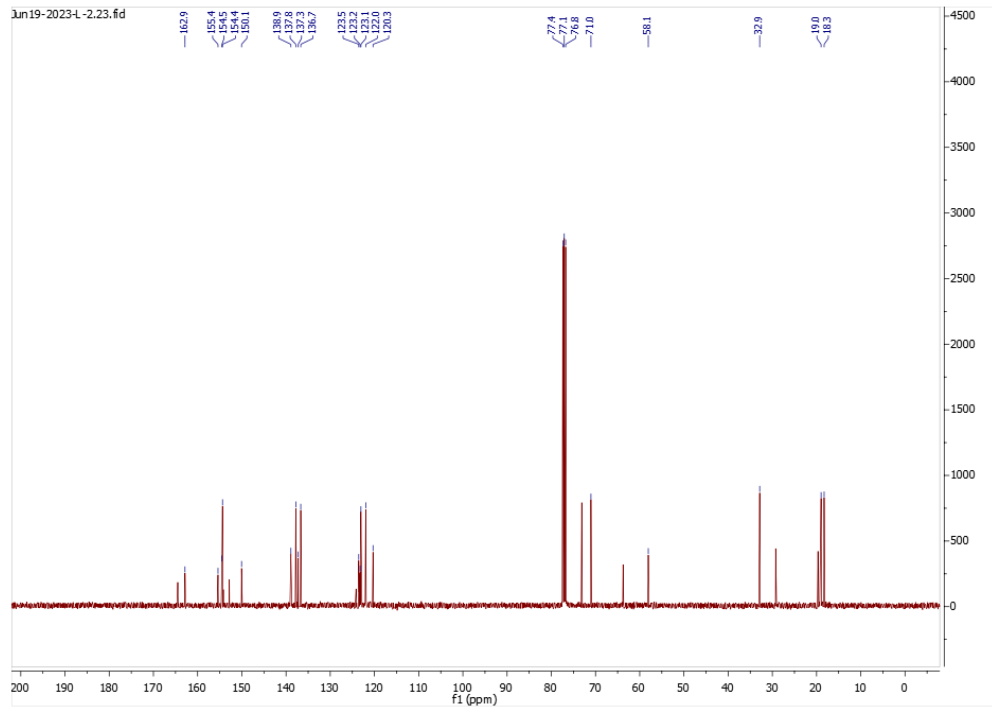

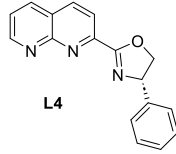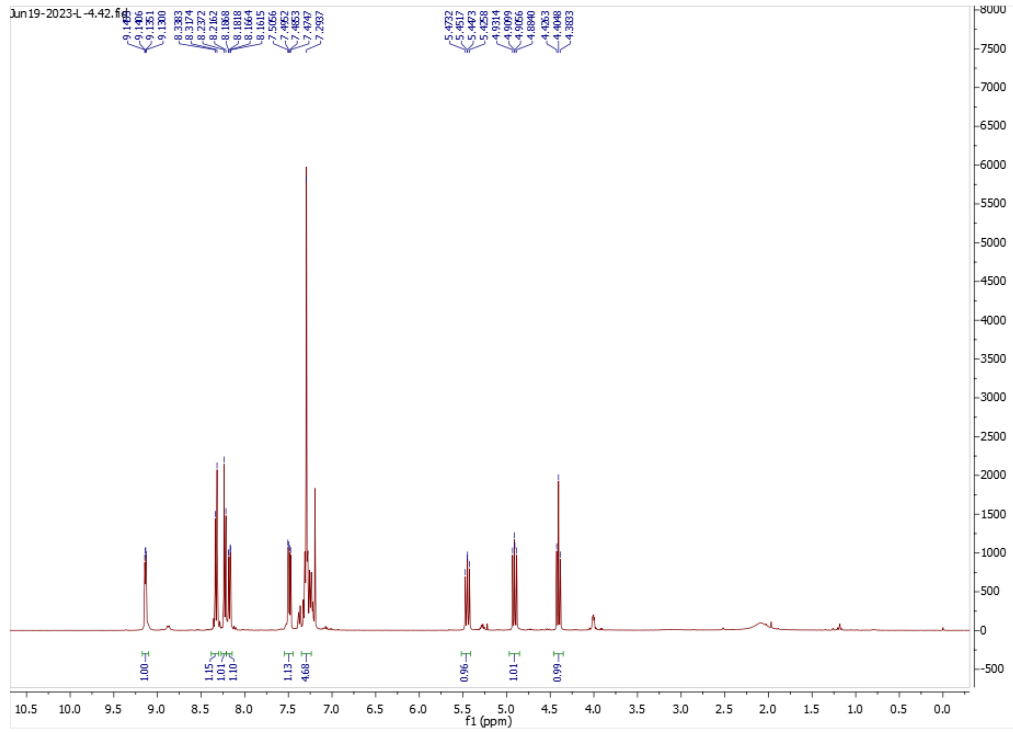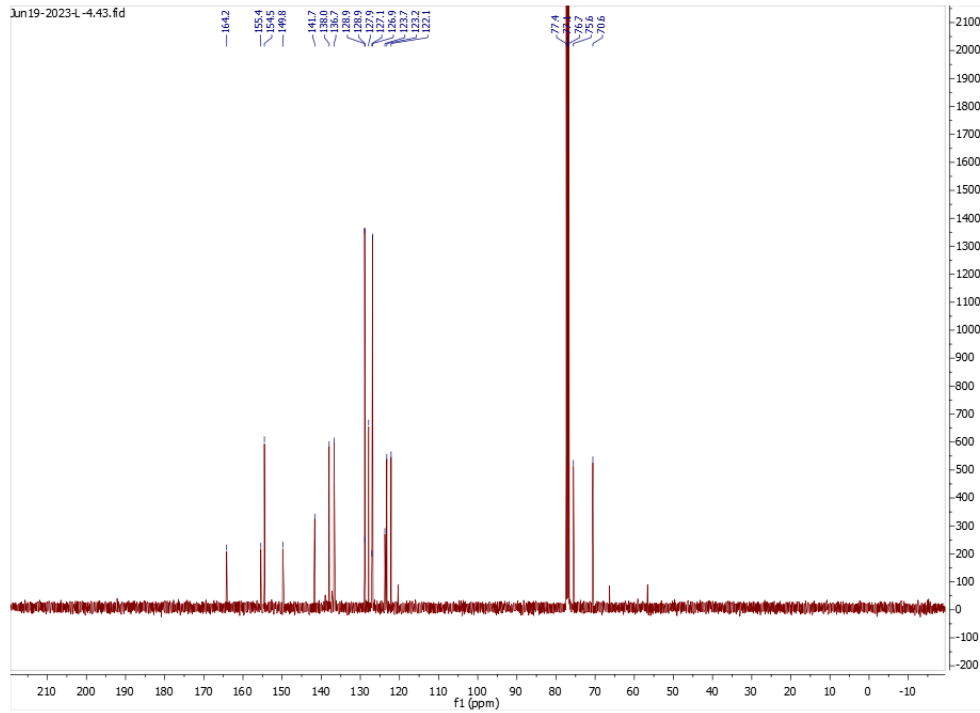

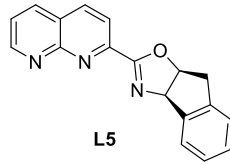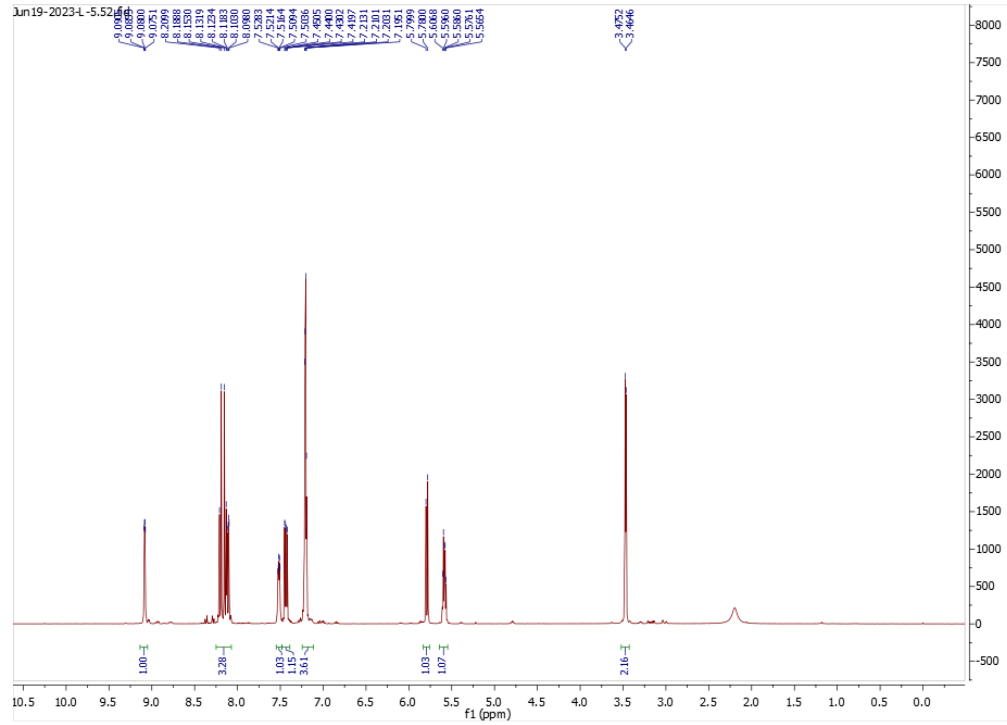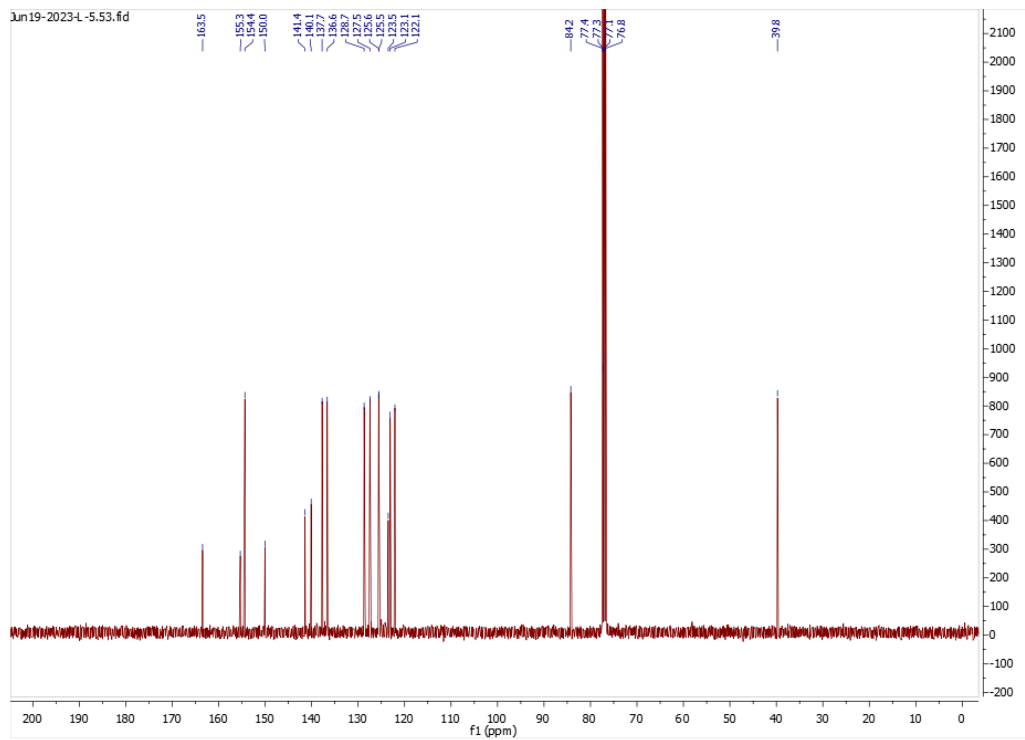



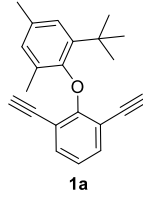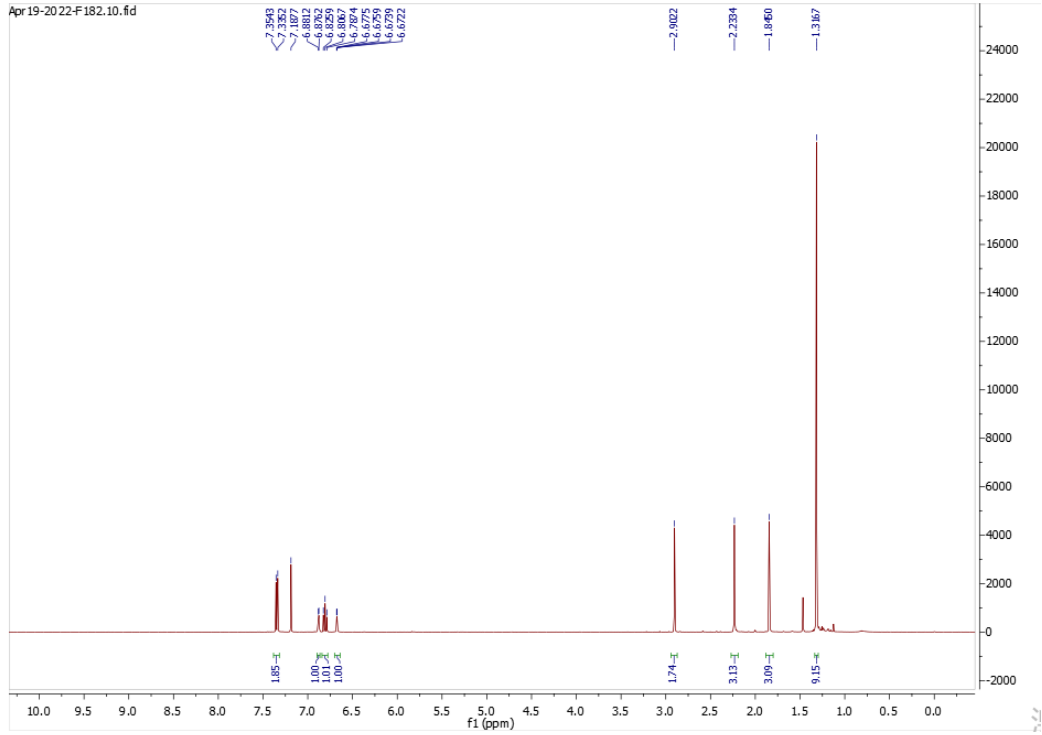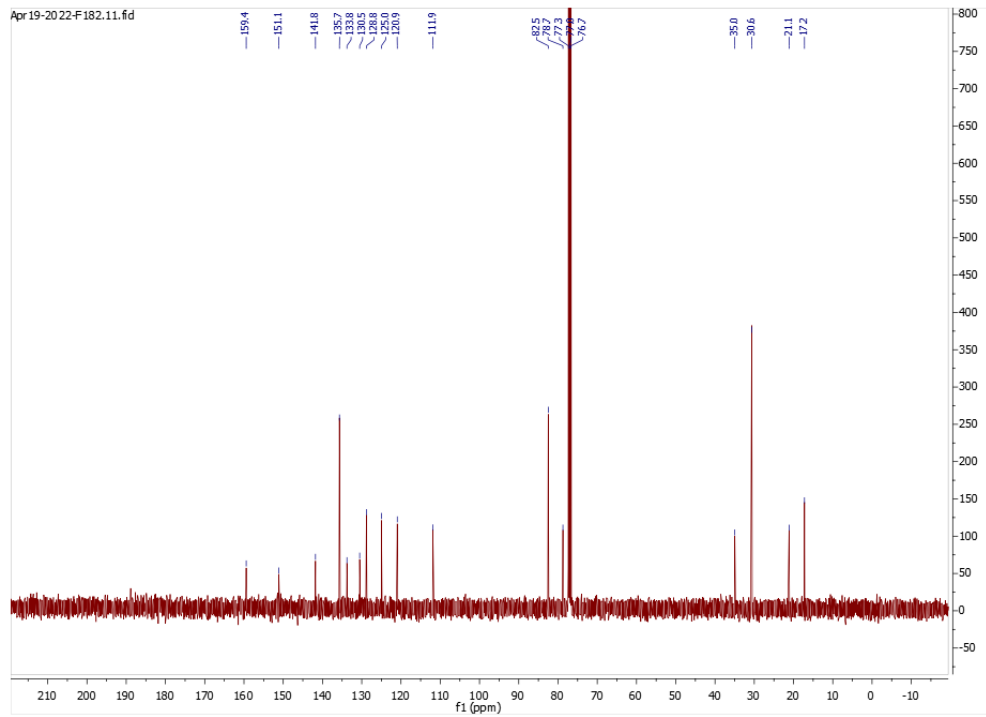

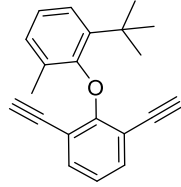

**1b**

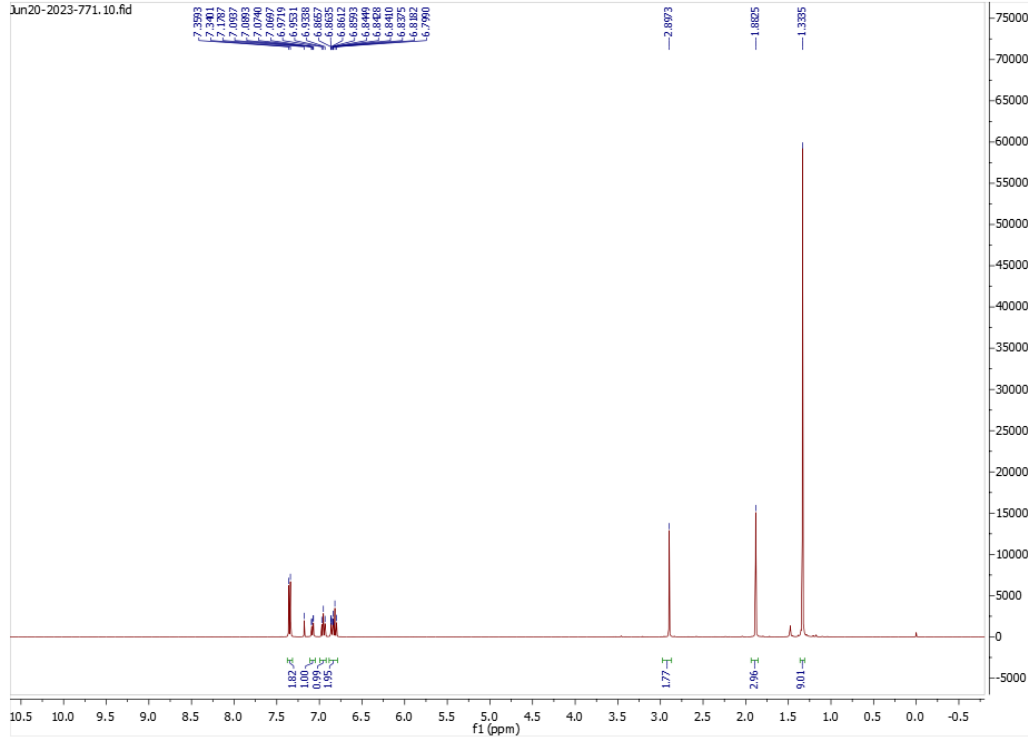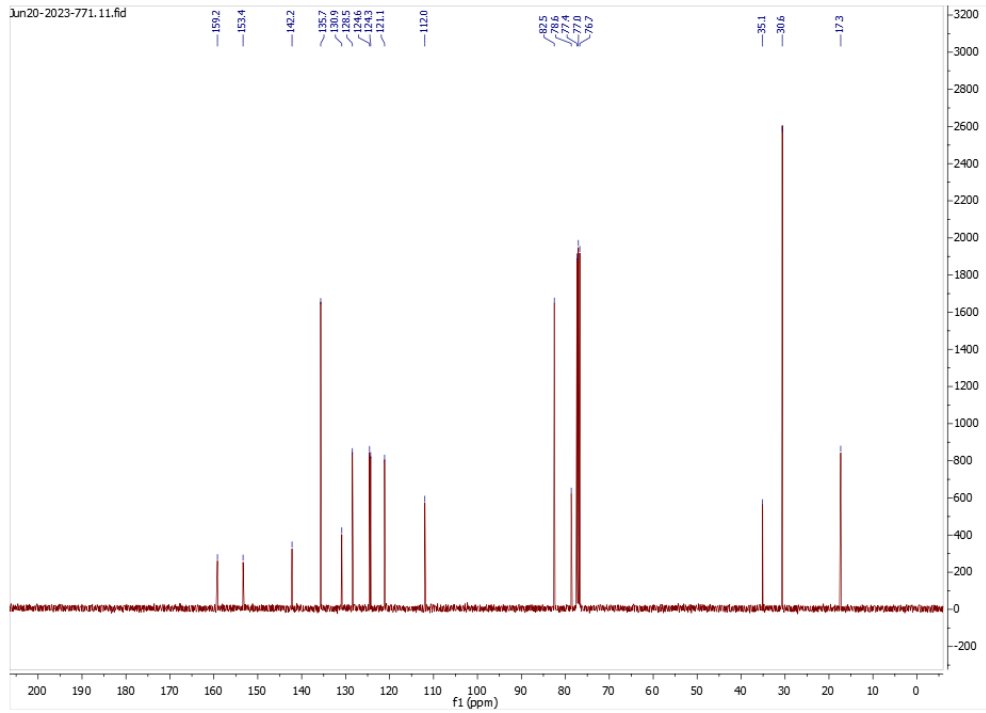

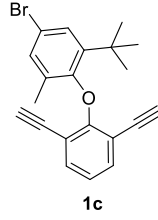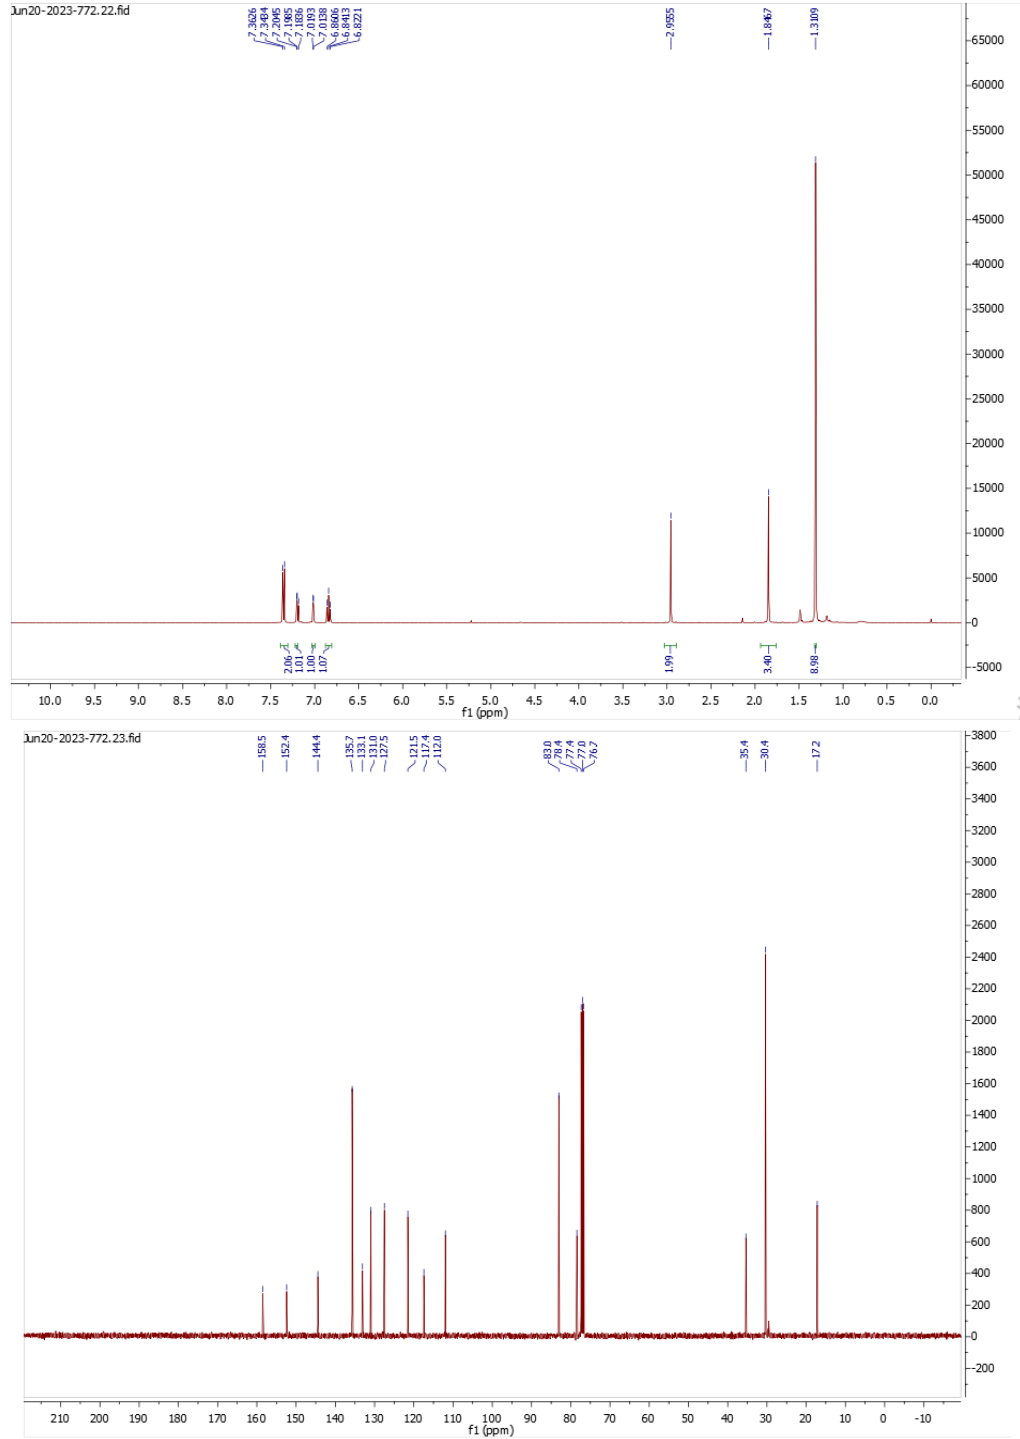

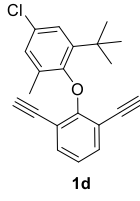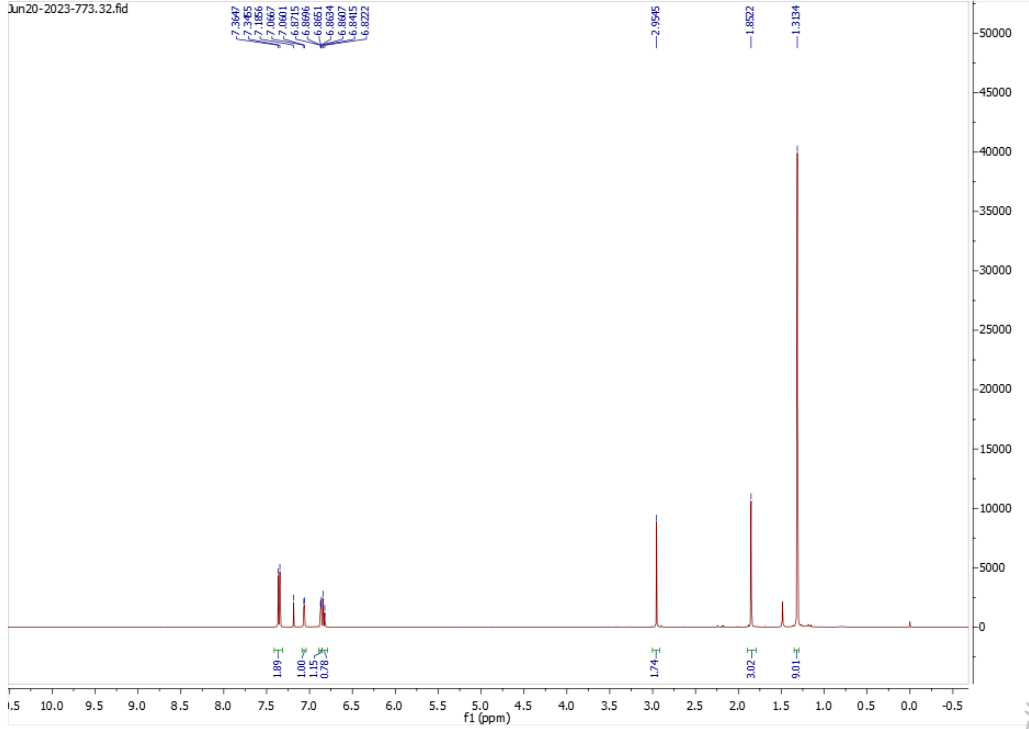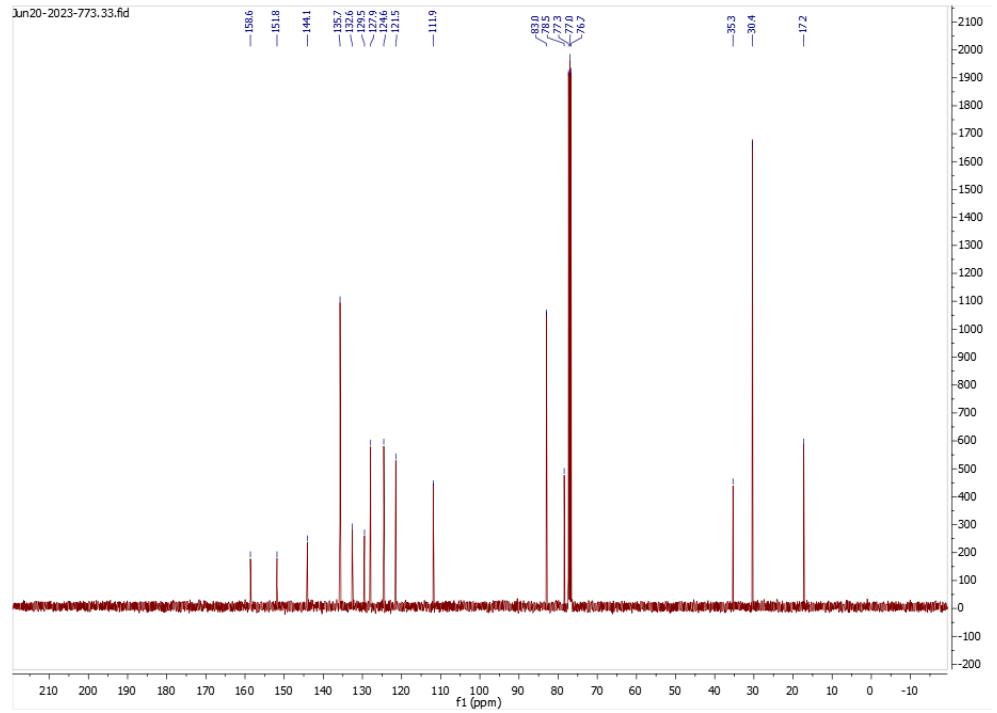

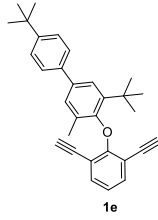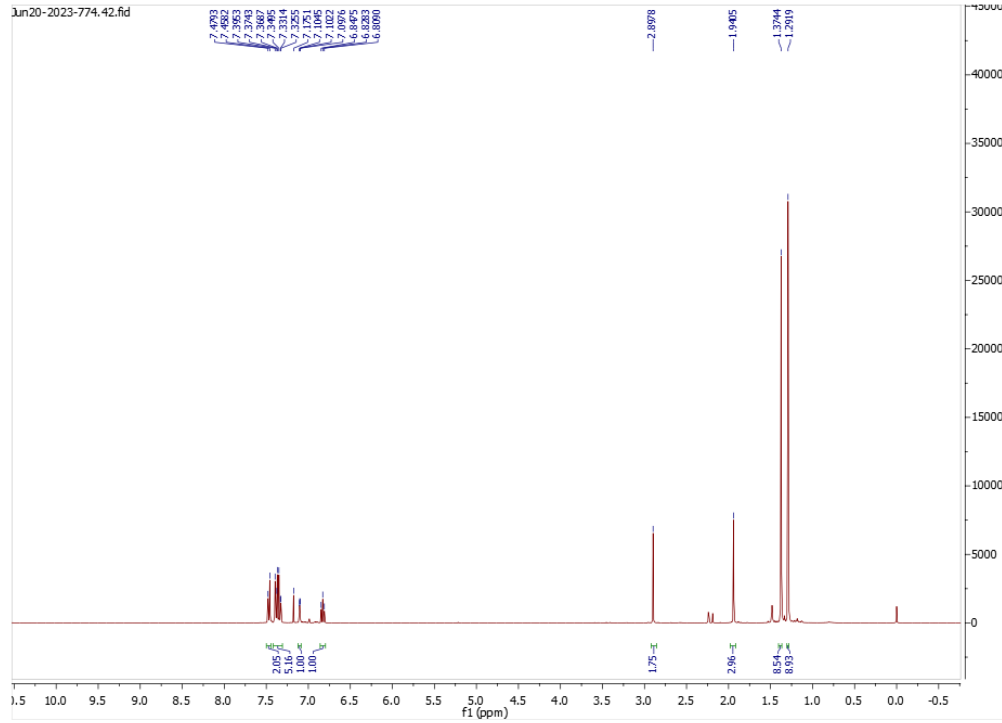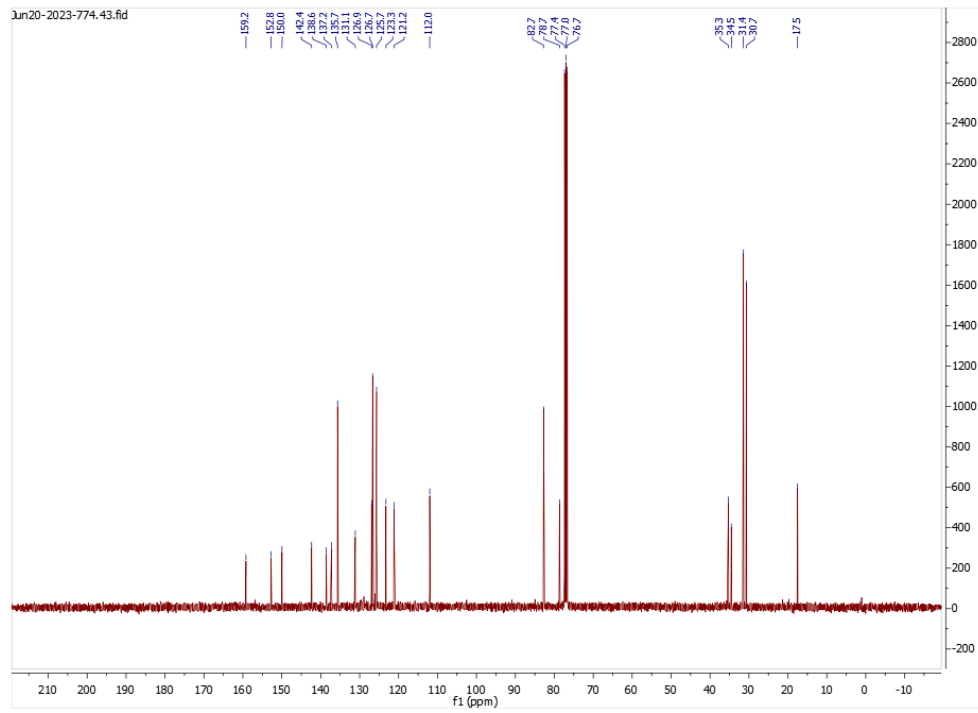

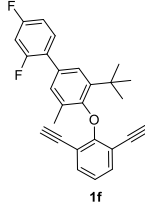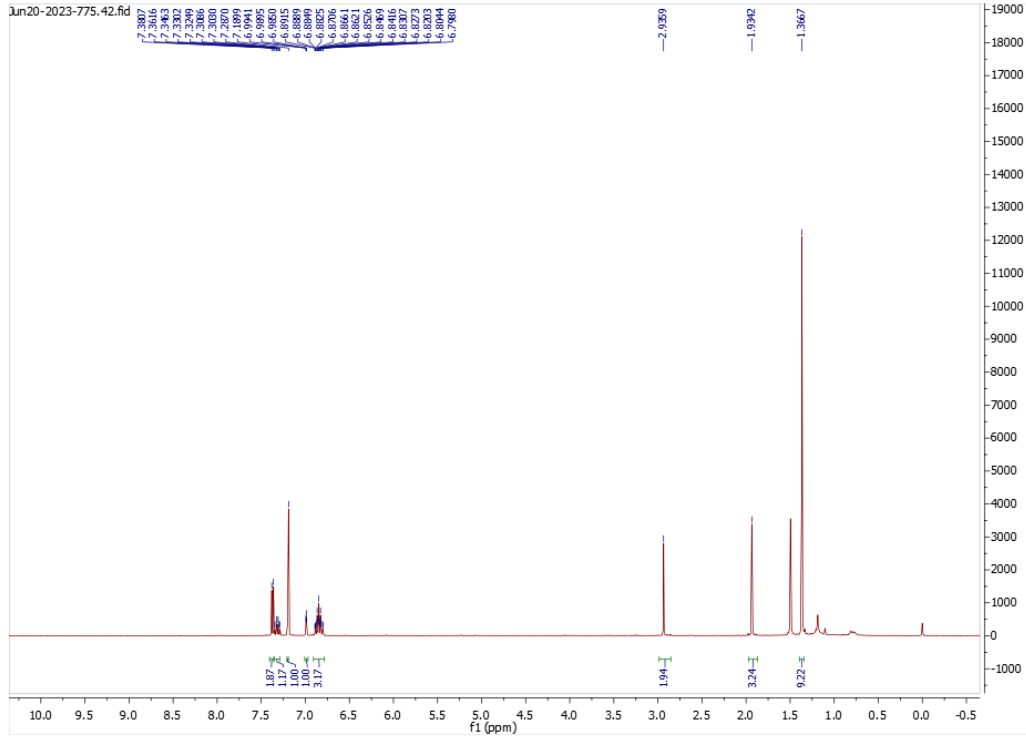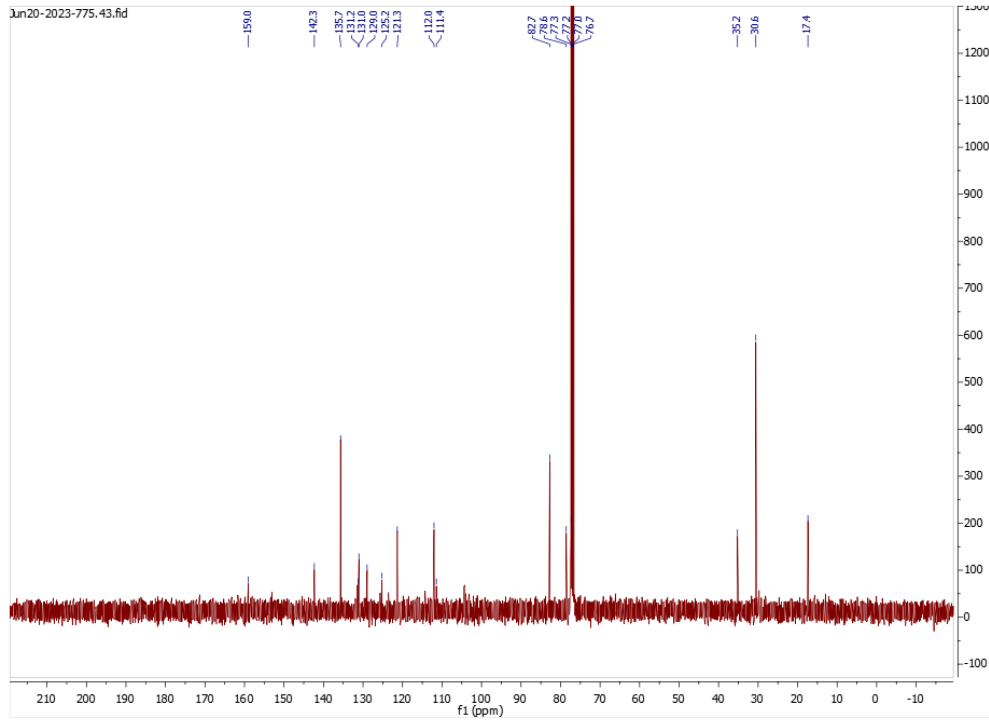

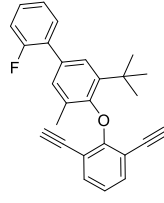

**1g**

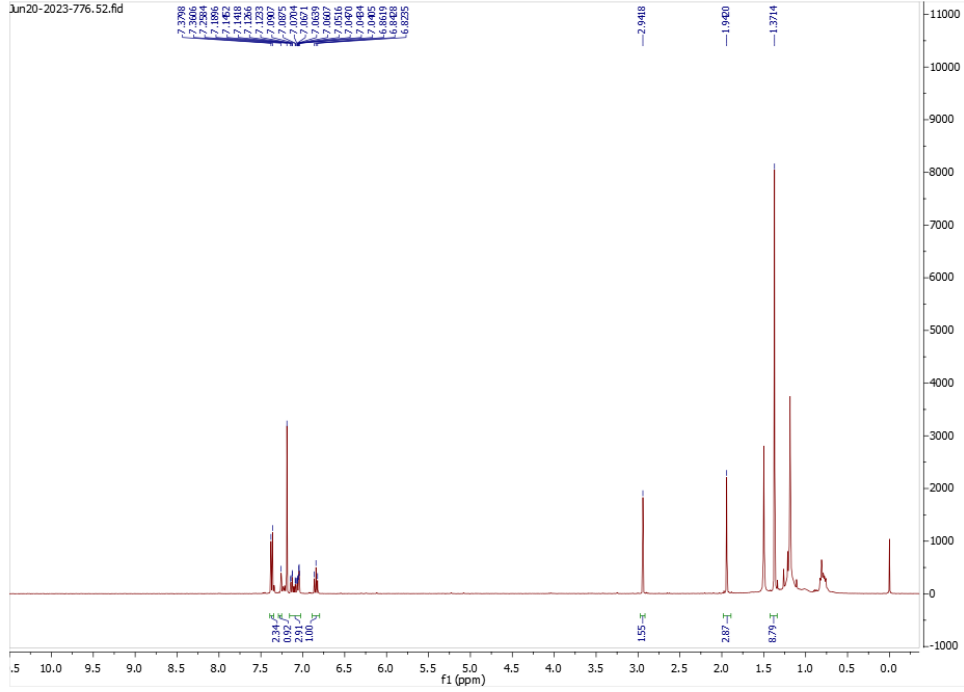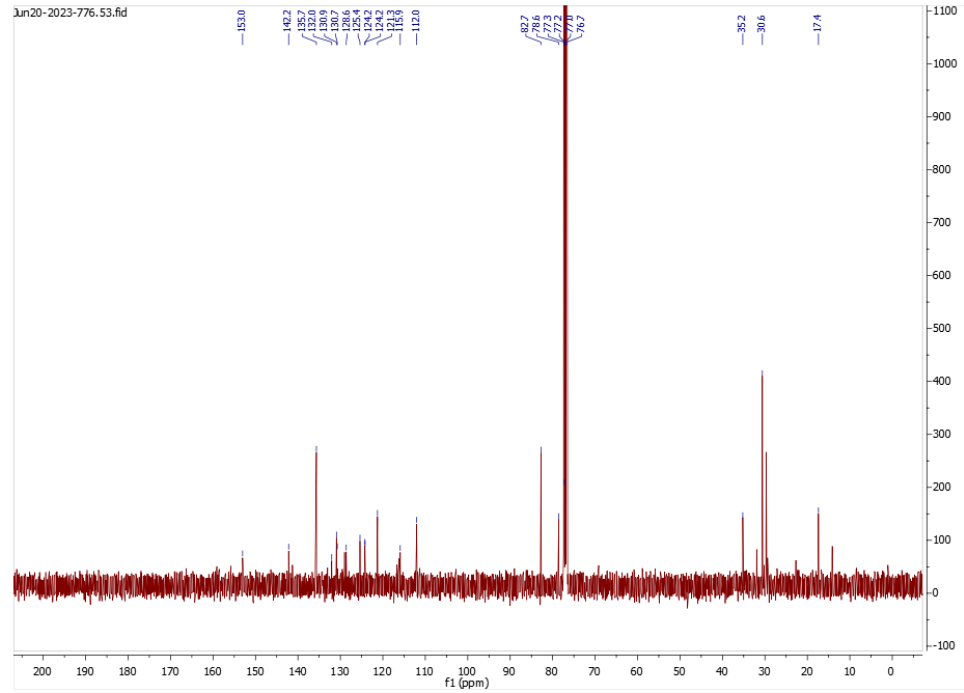

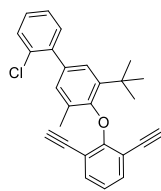

1h

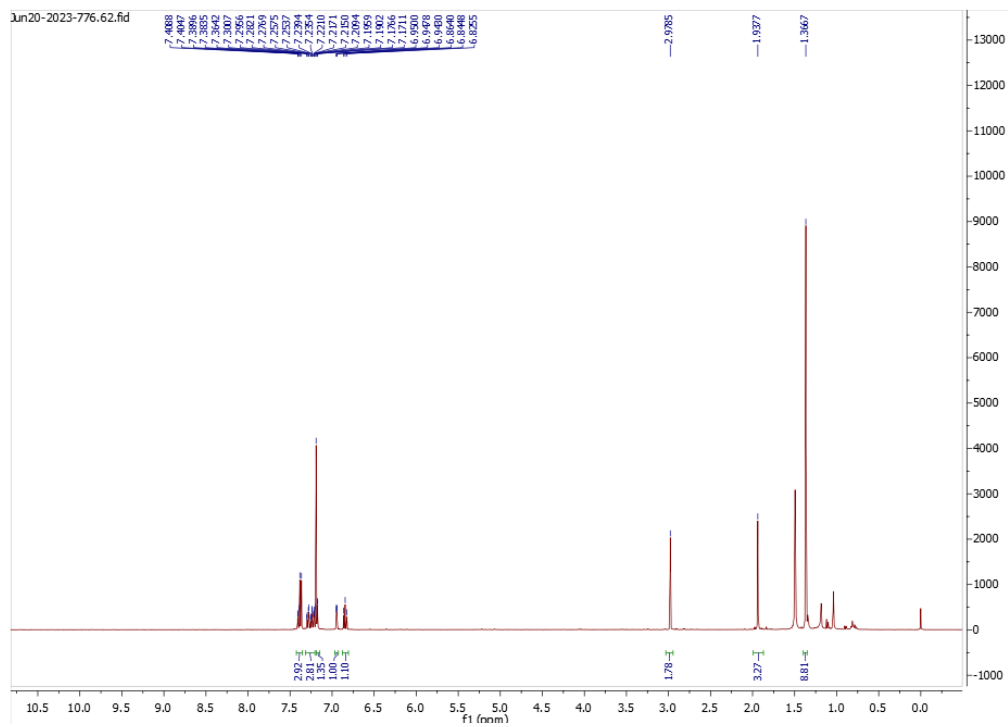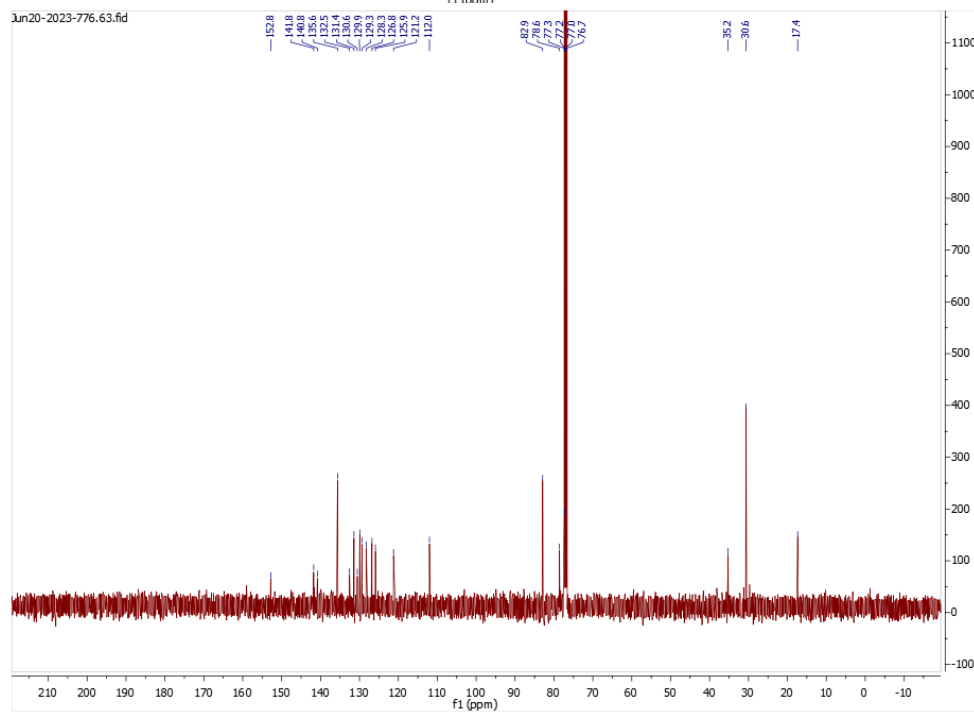





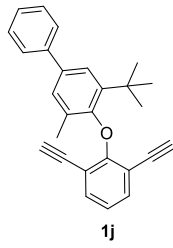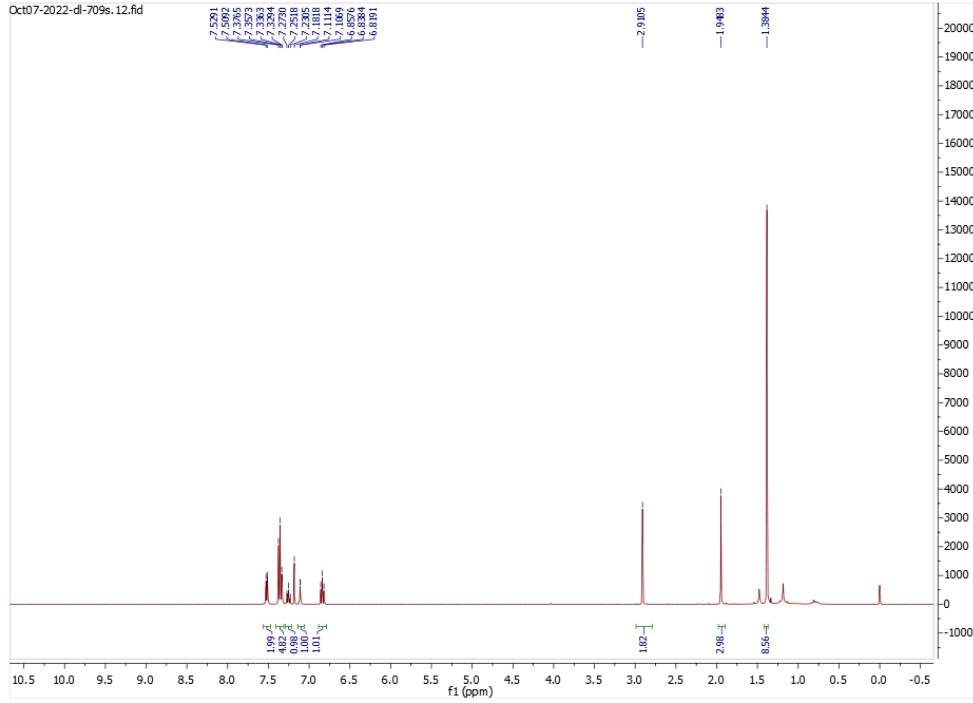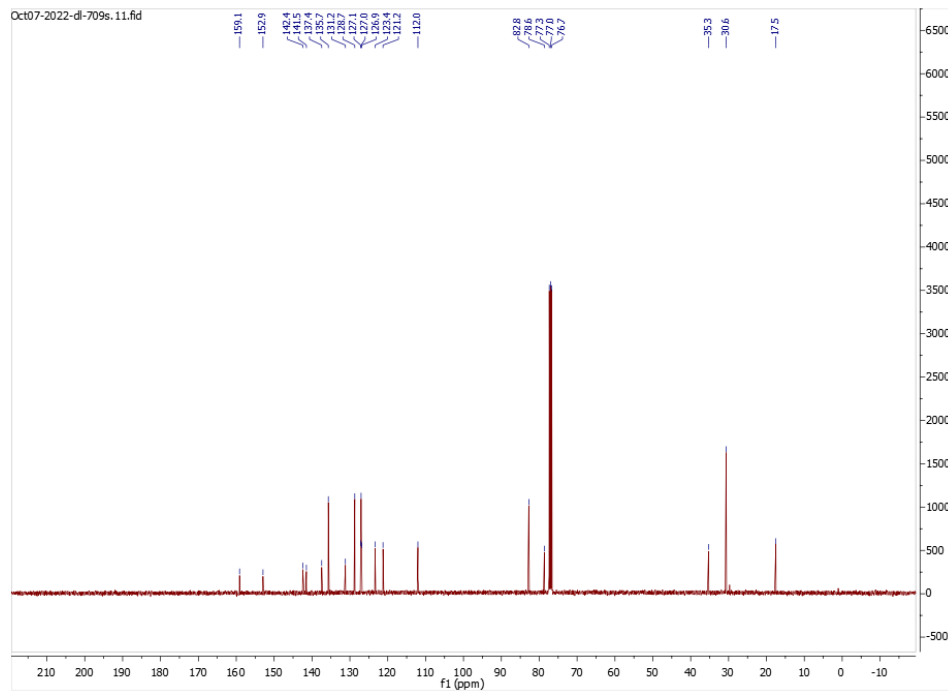

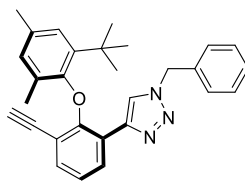

3a

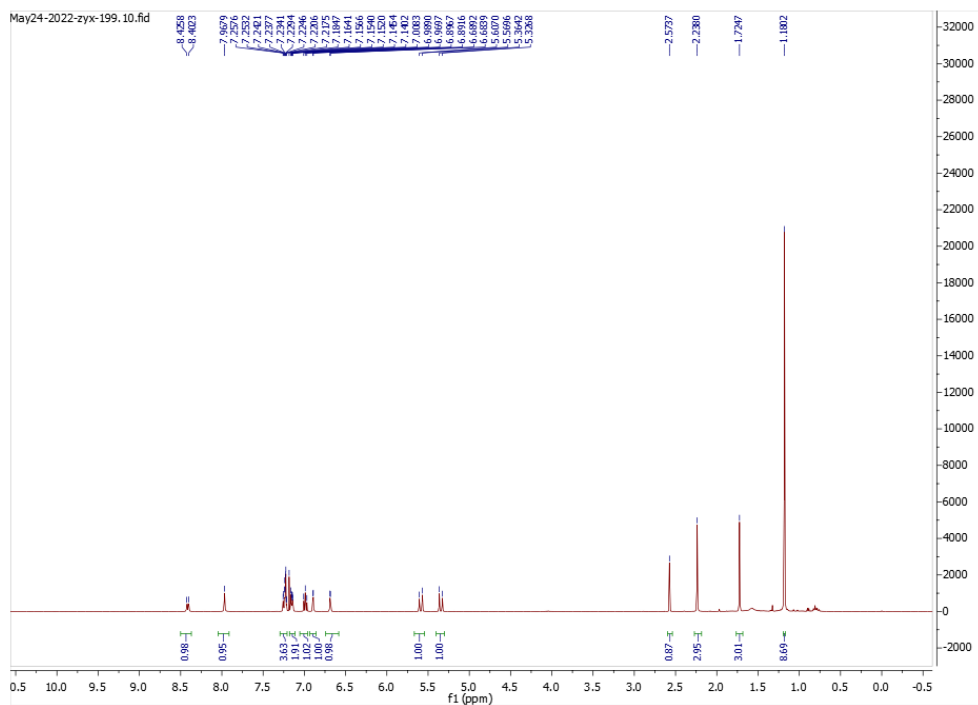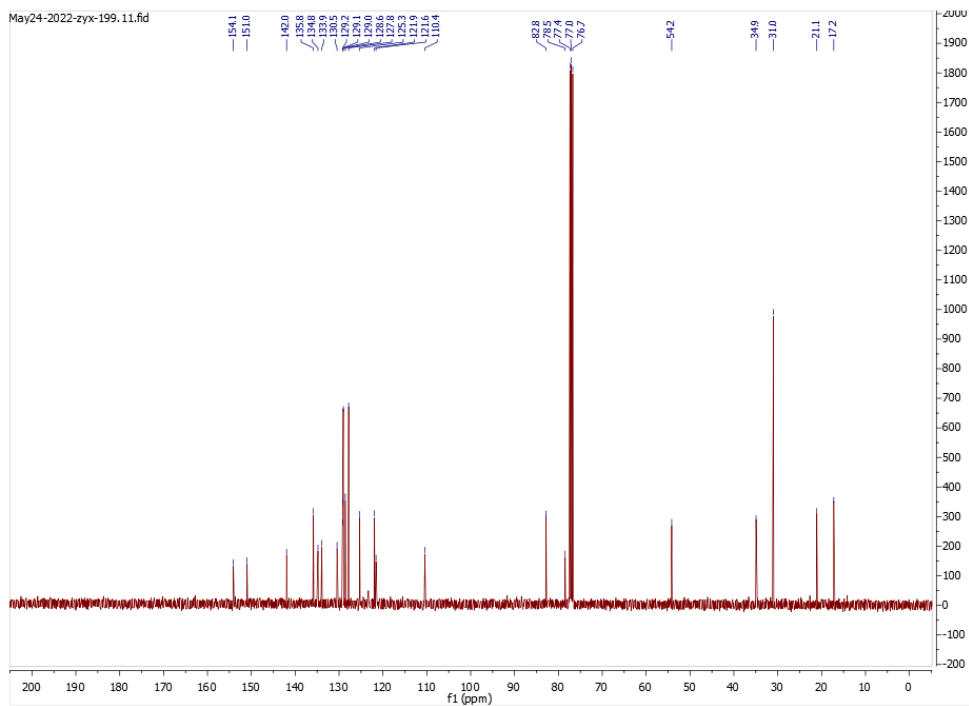



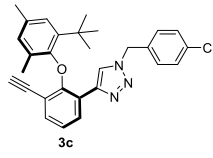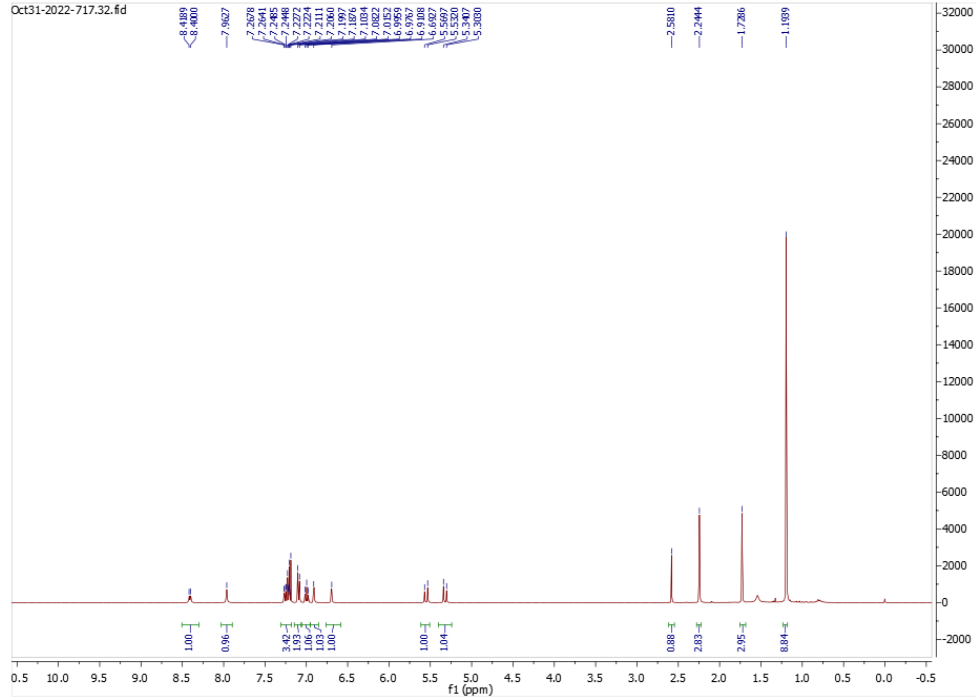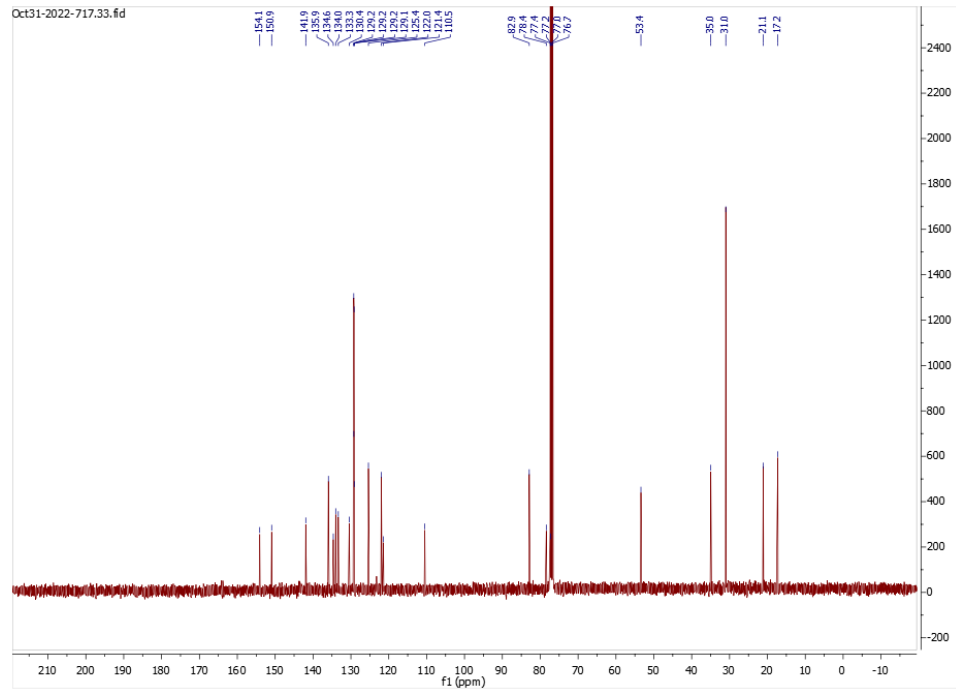

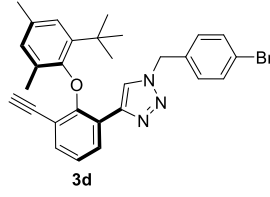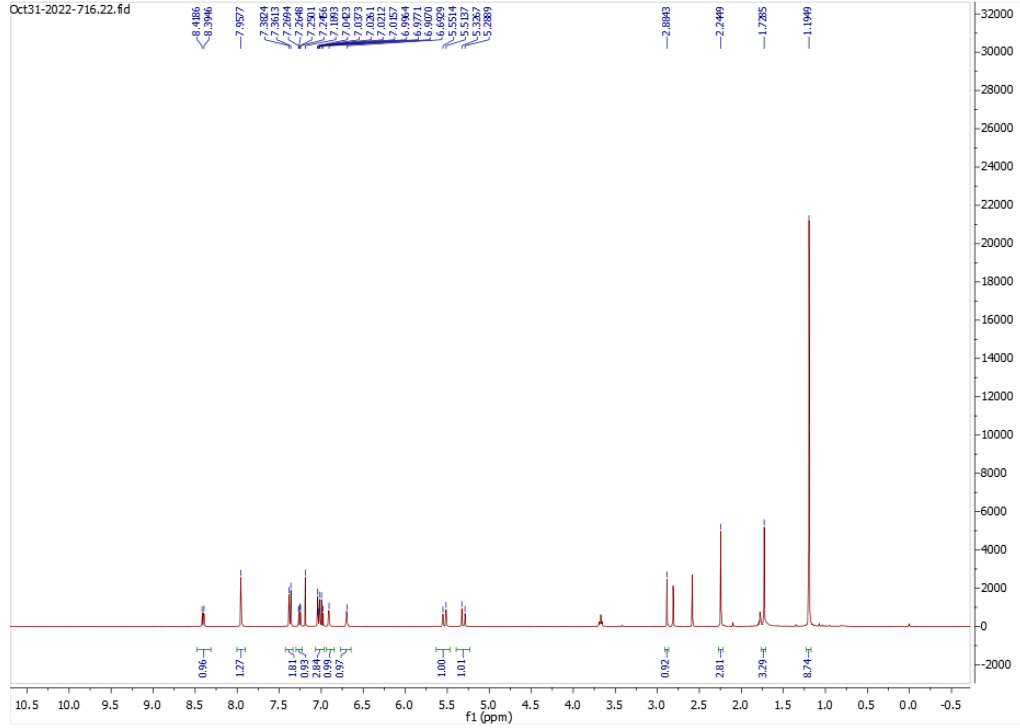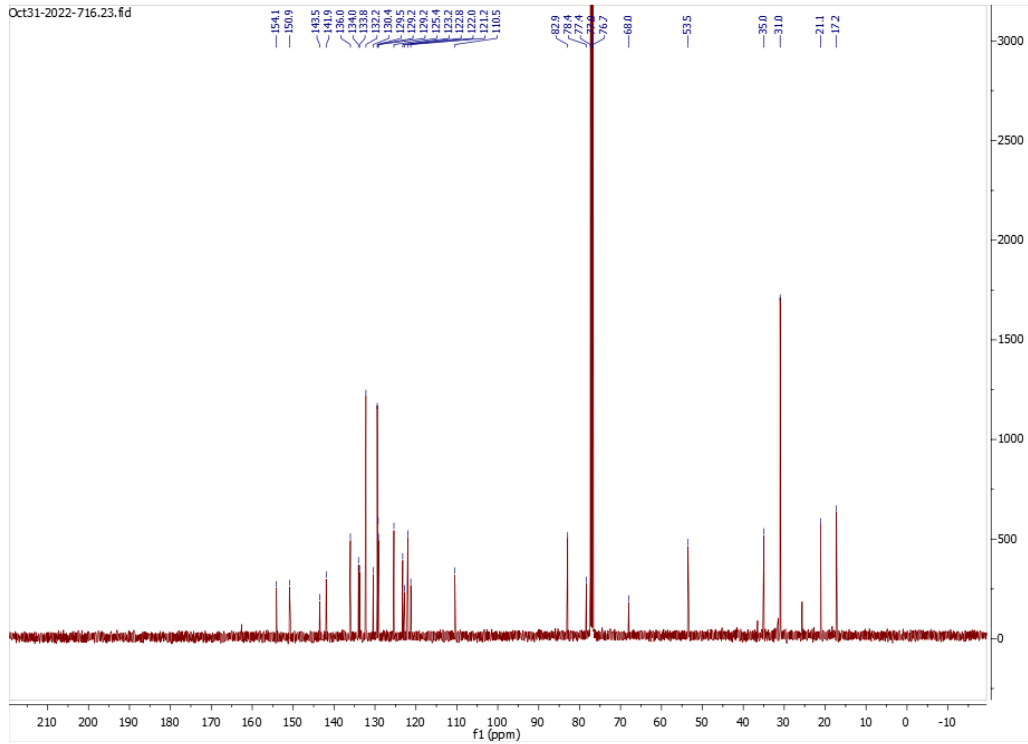

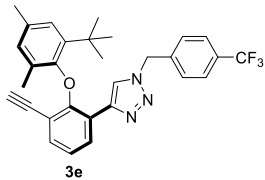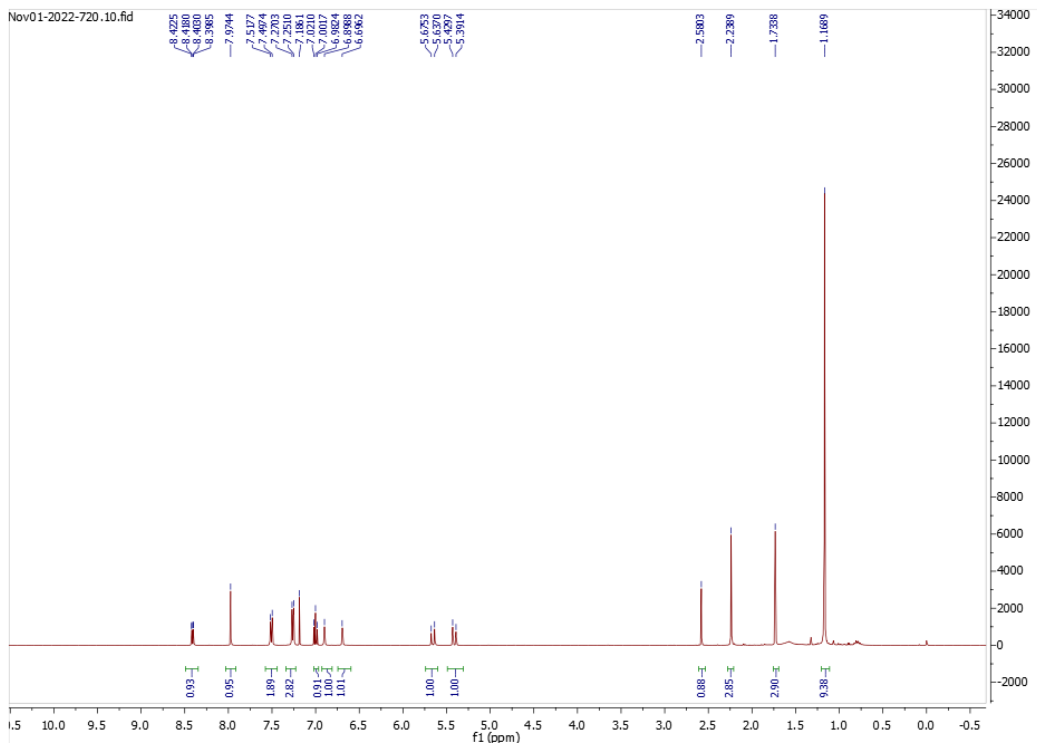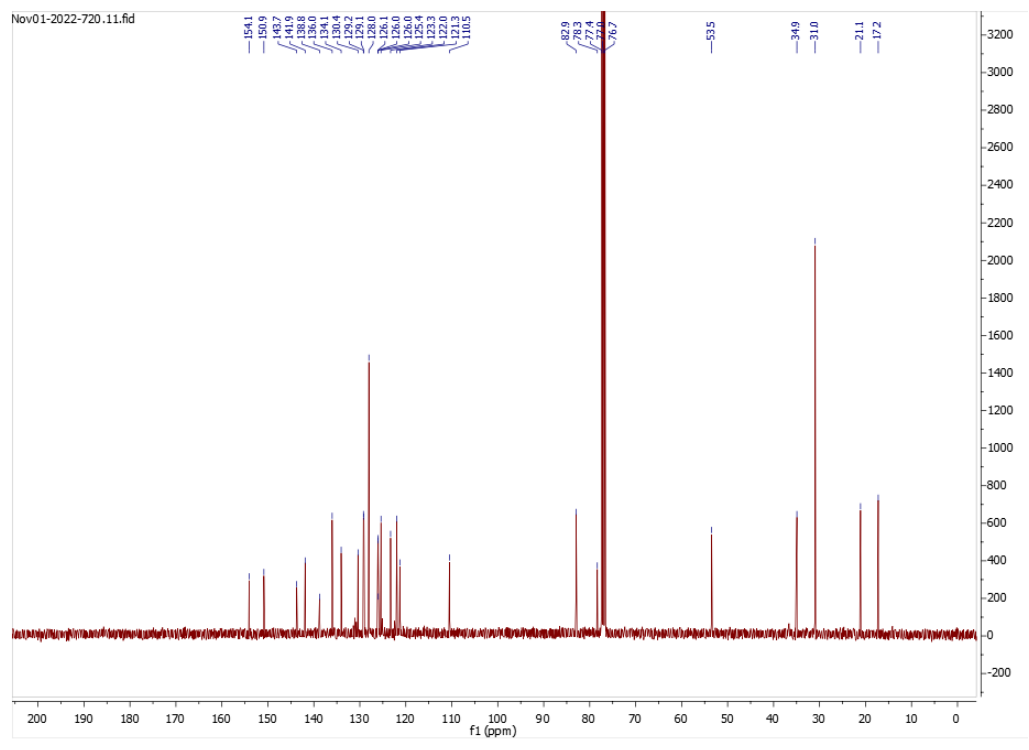

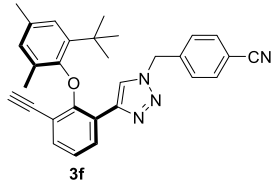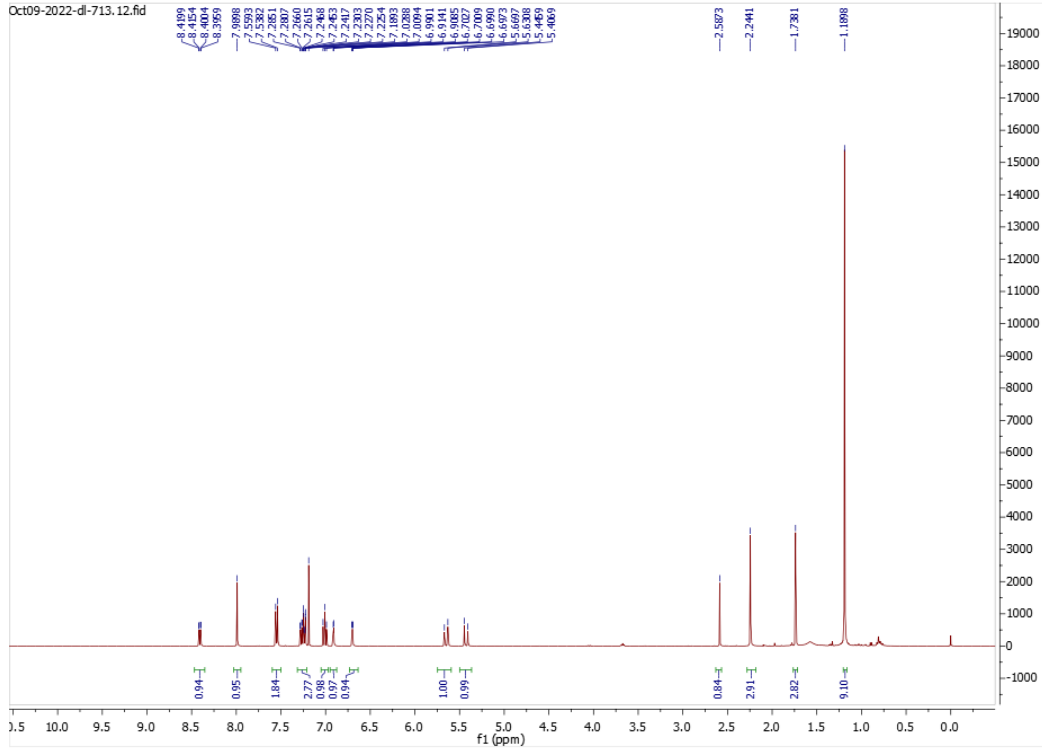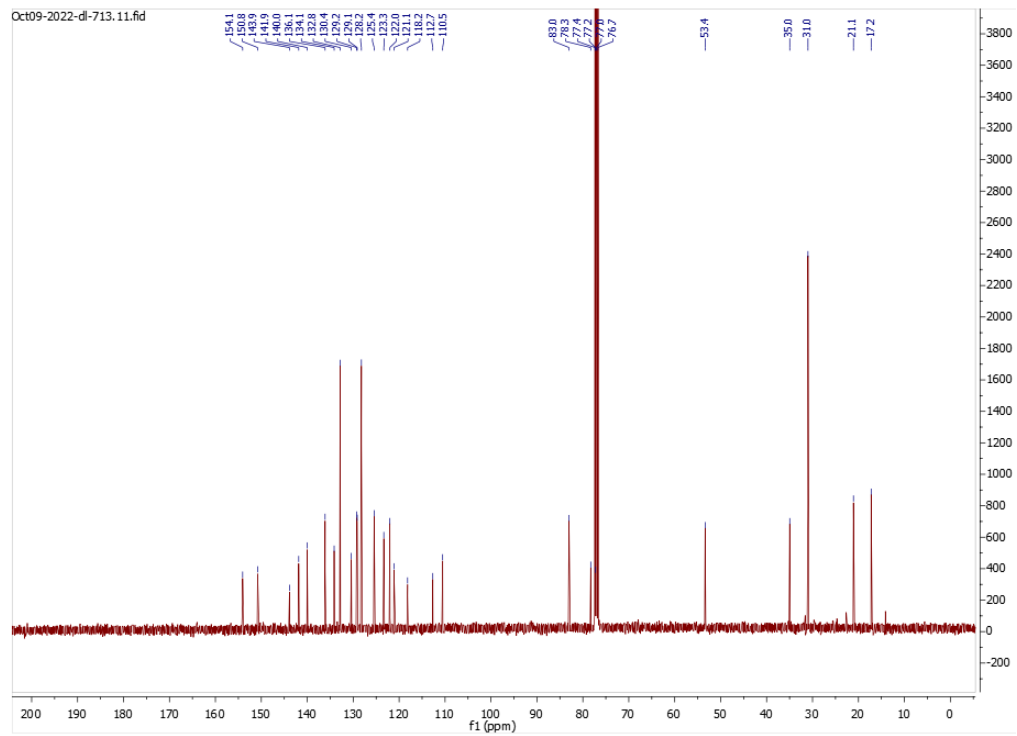



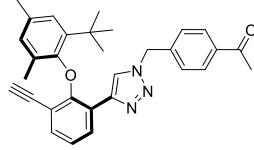

3g

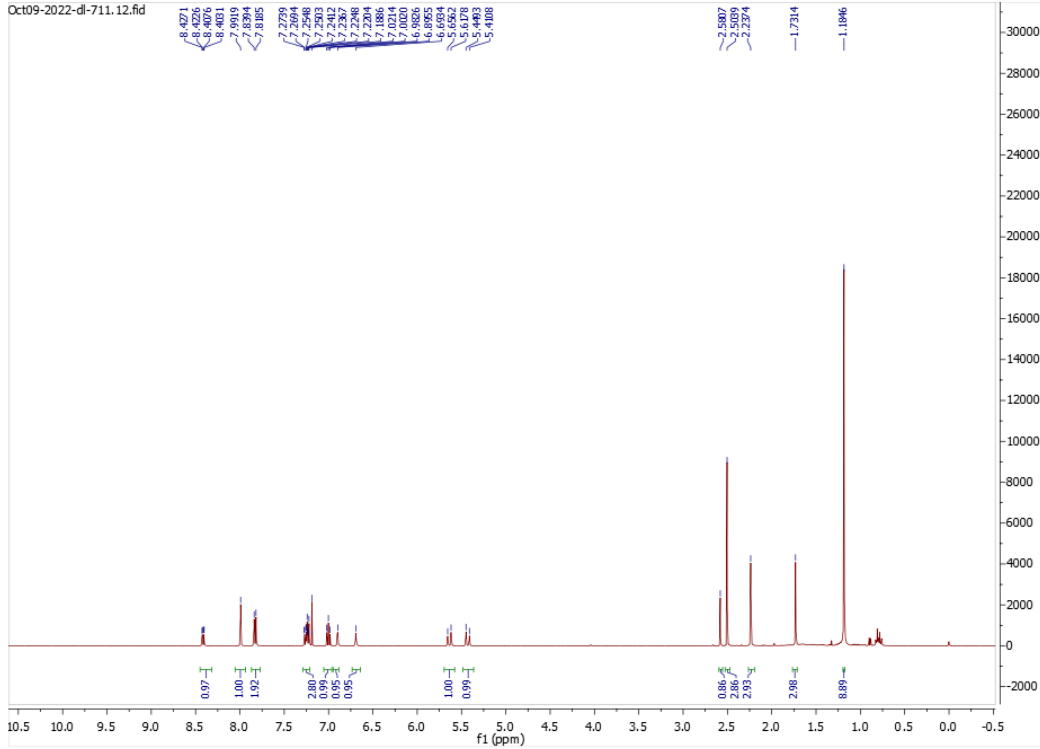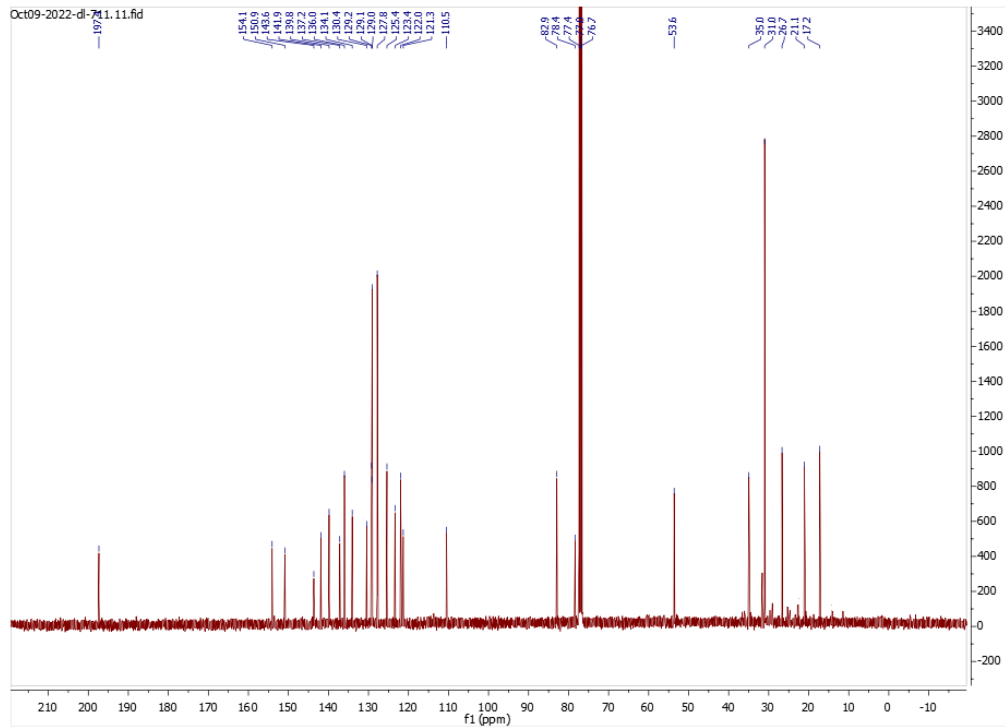

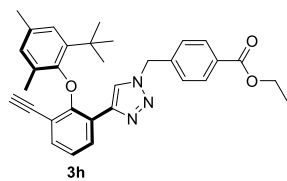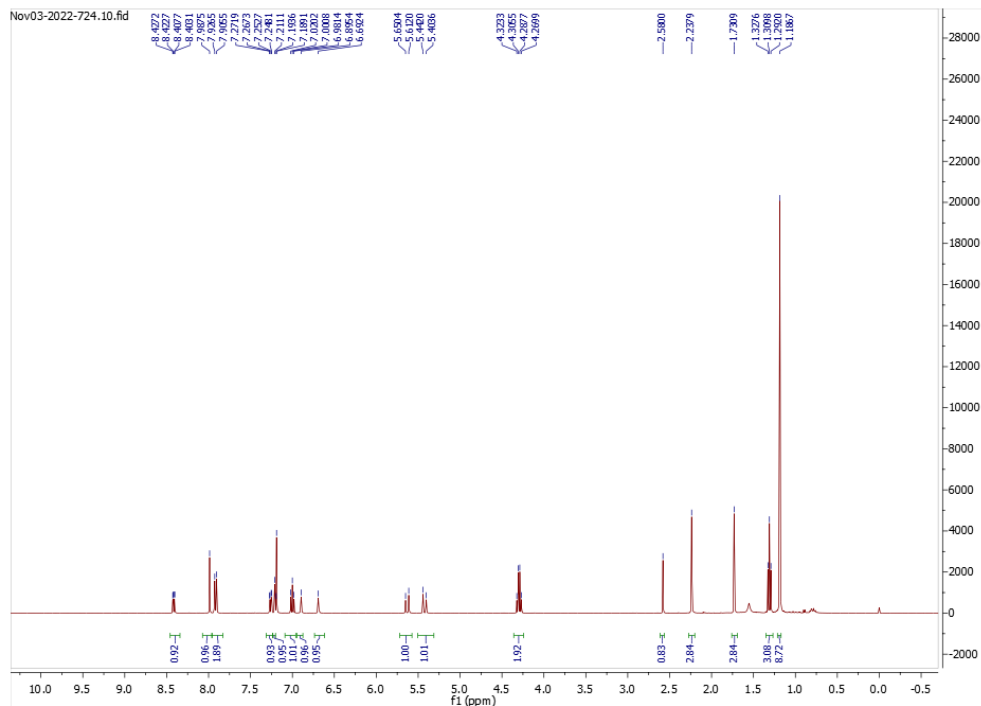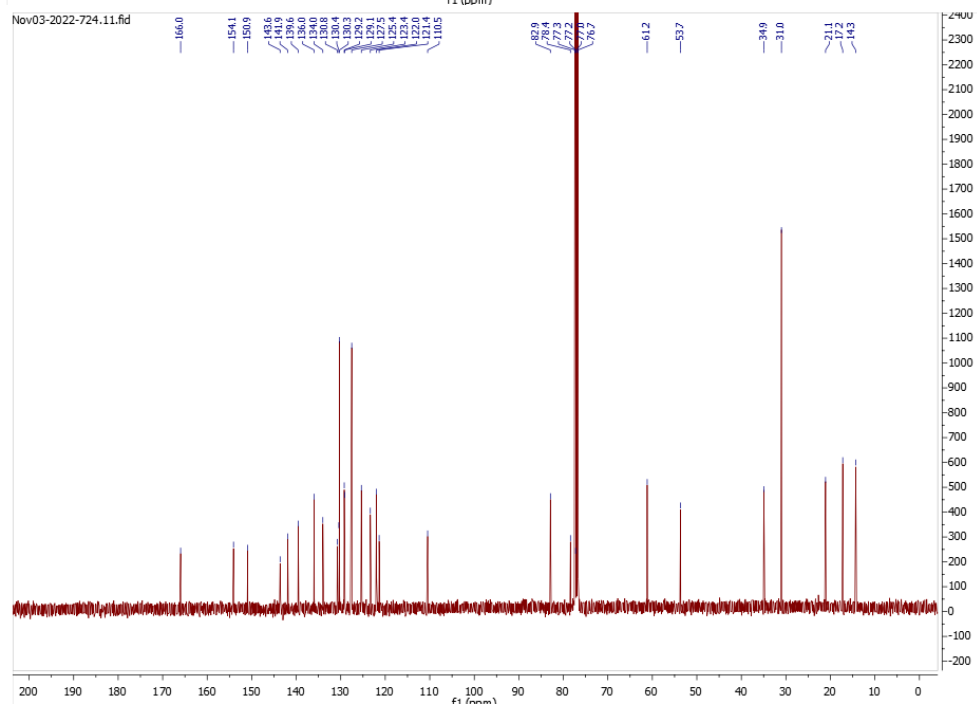

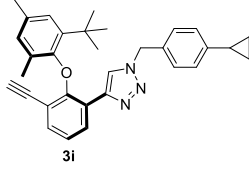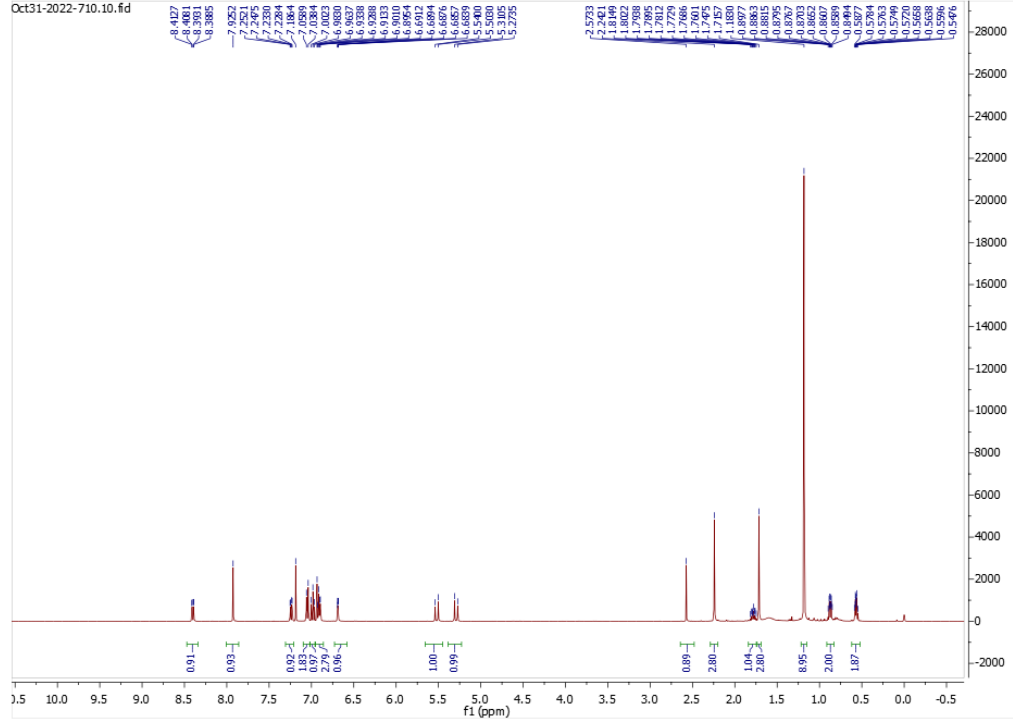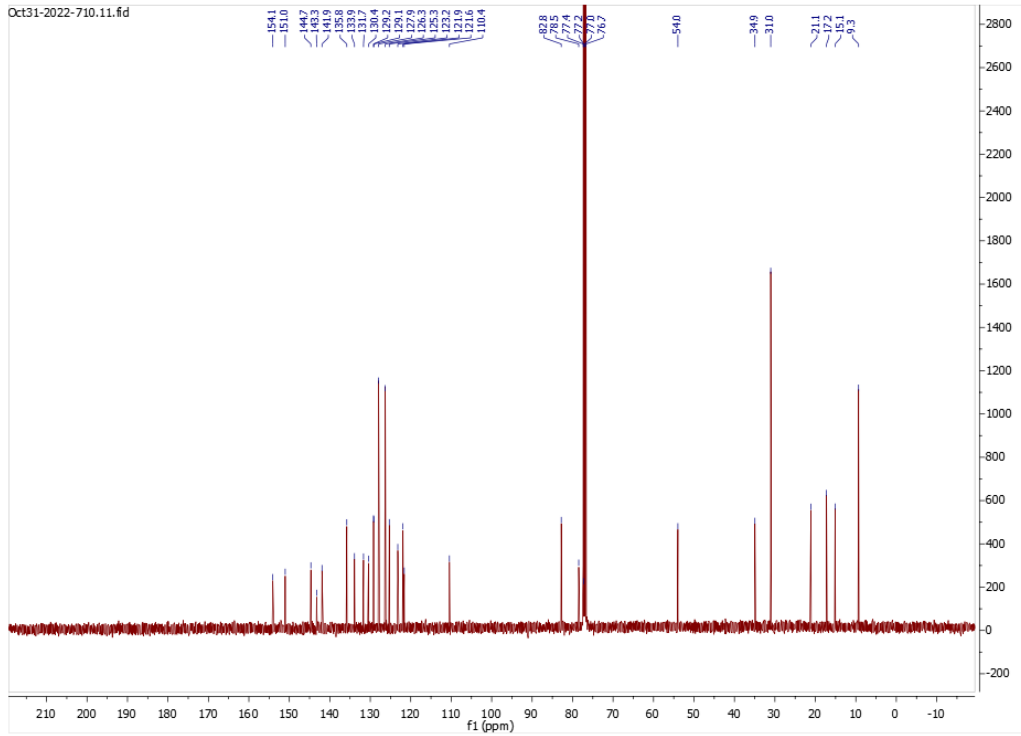

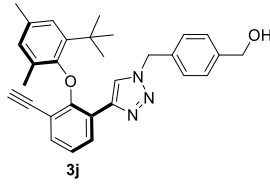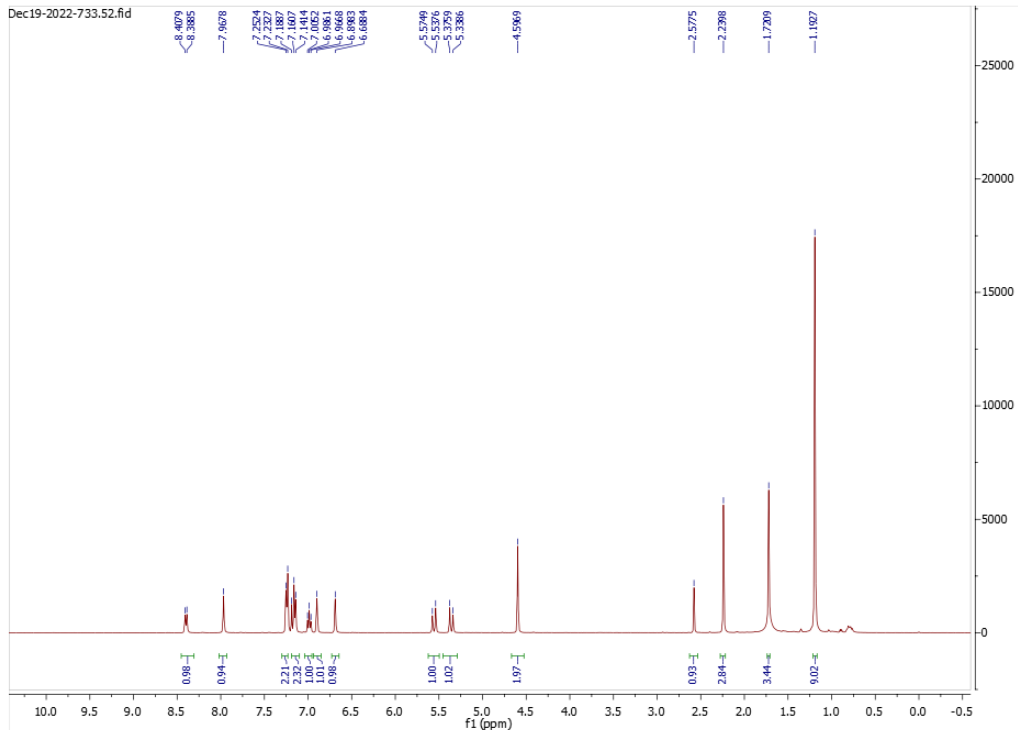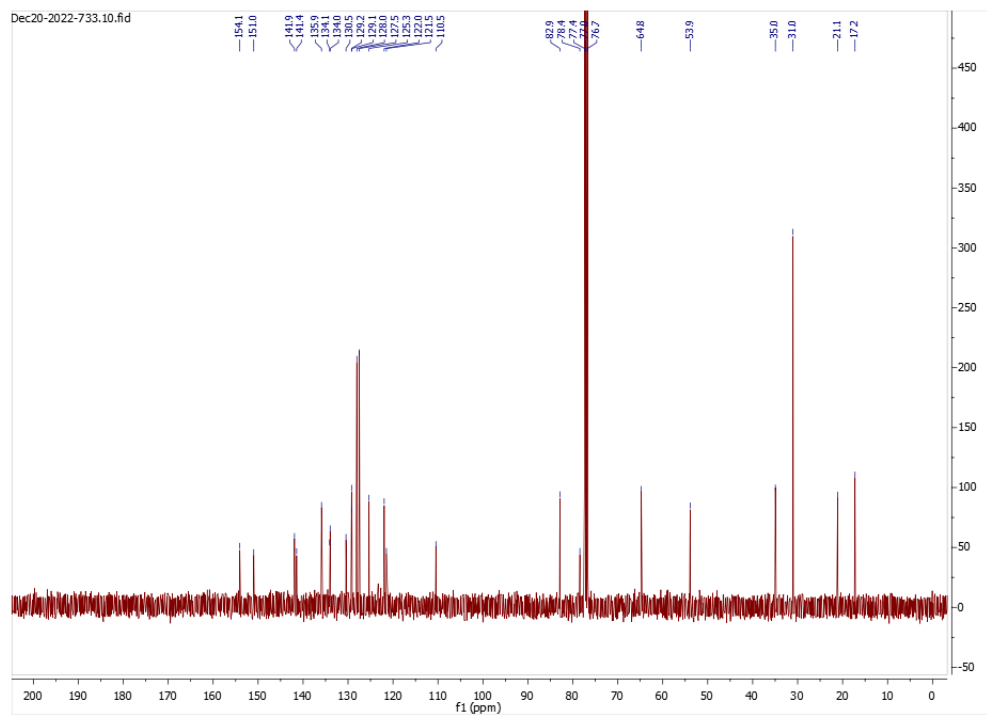

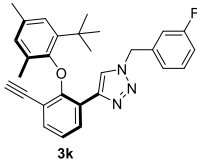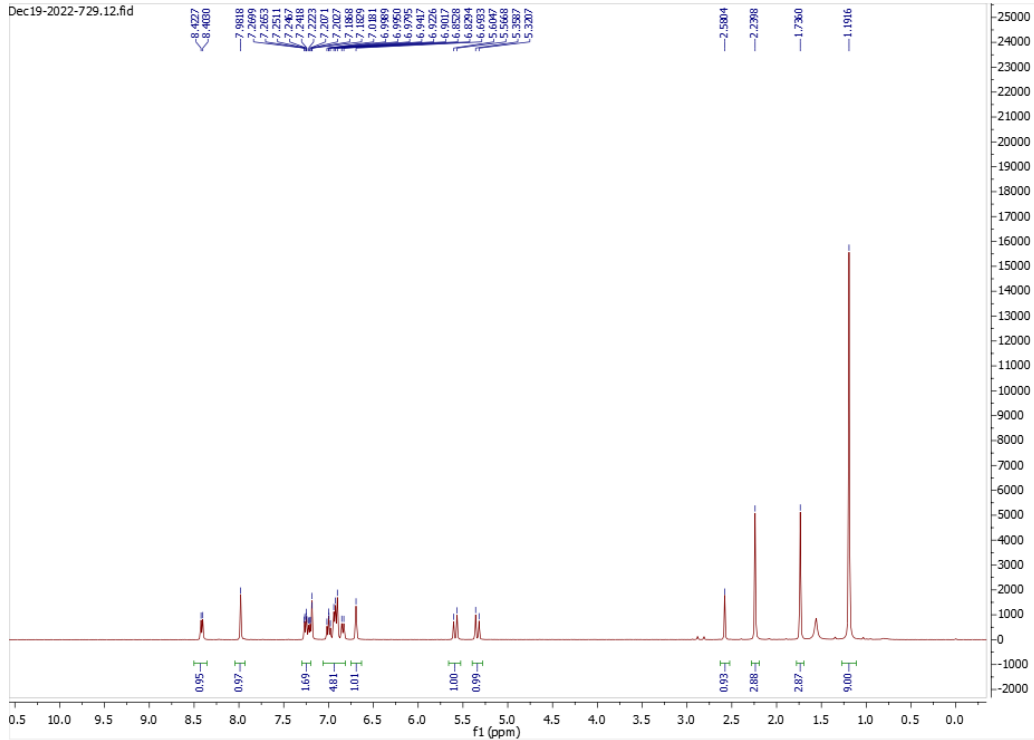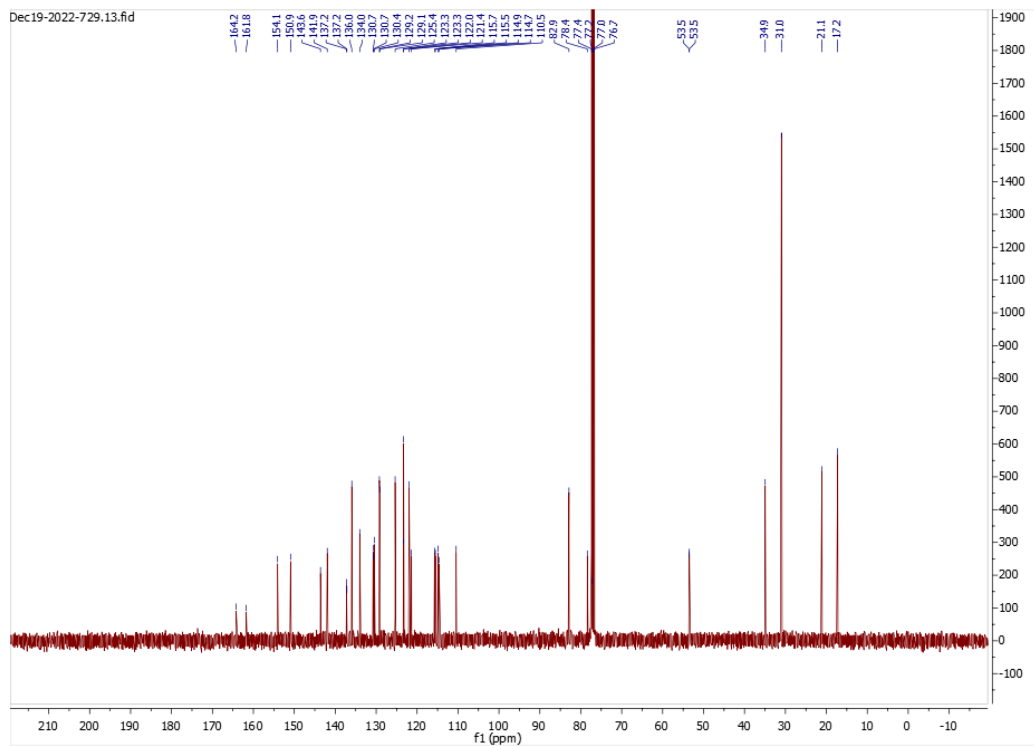

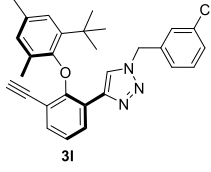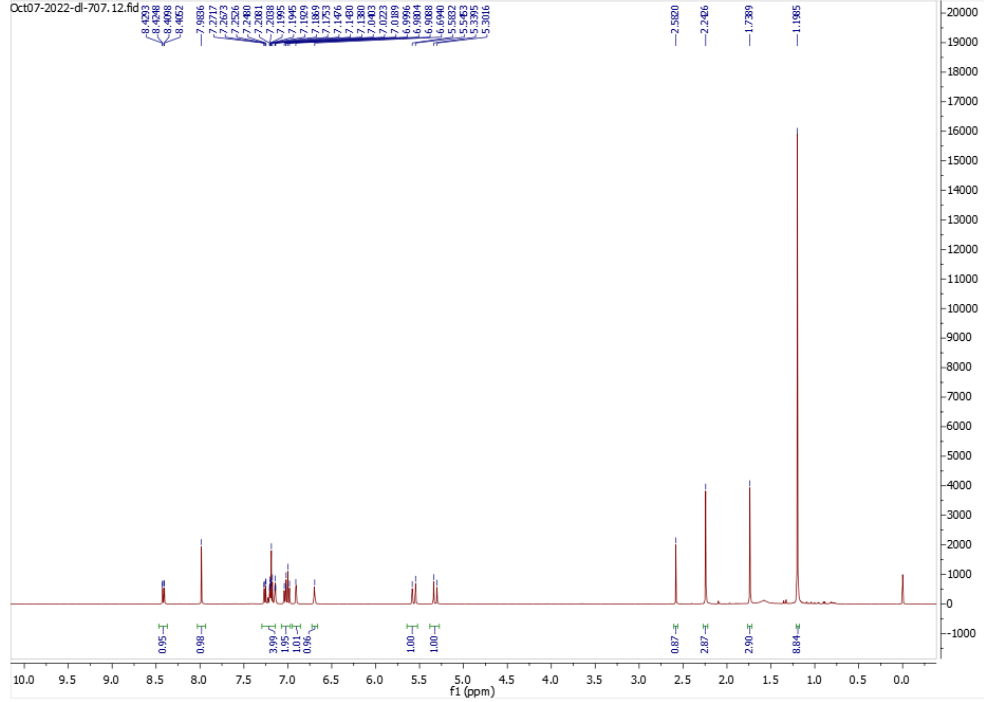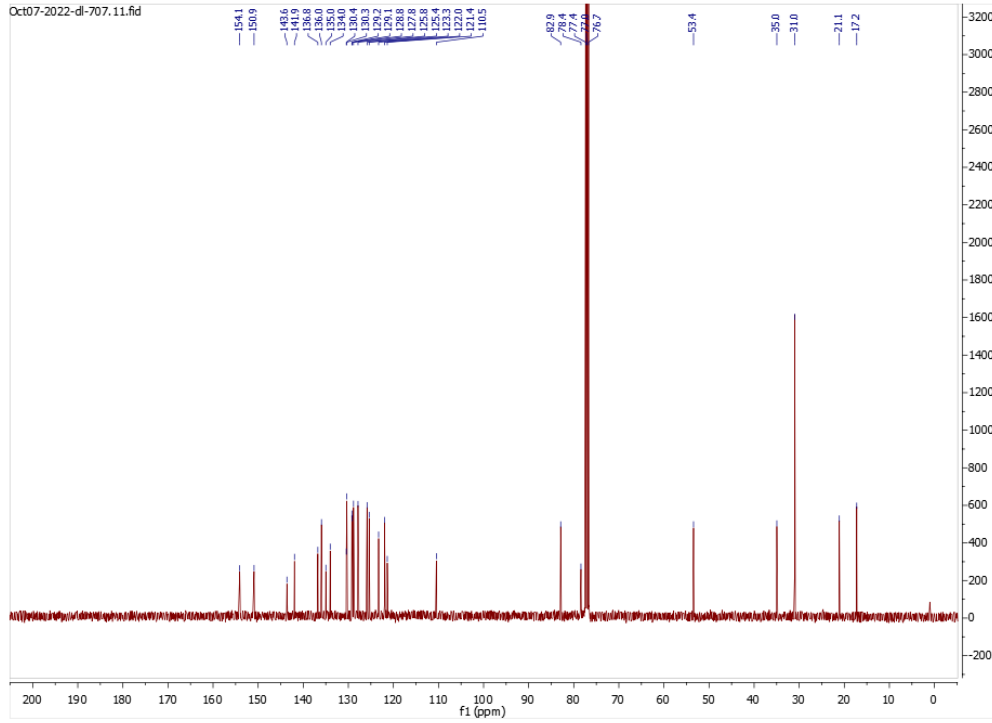

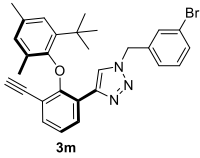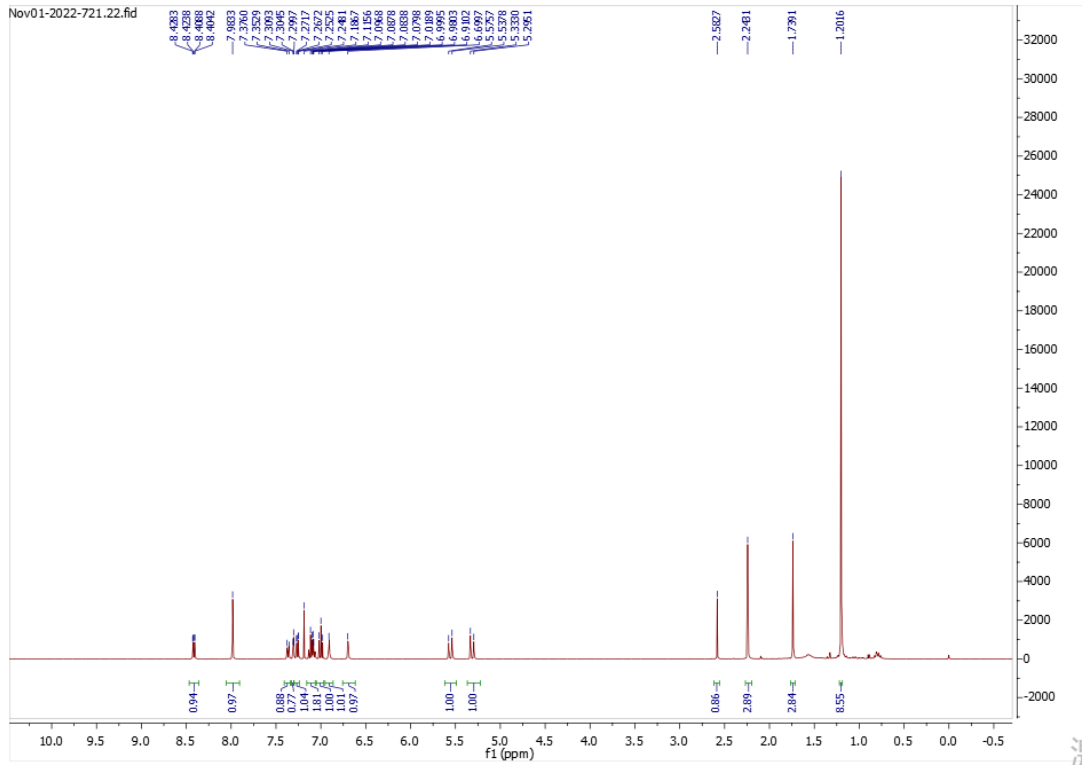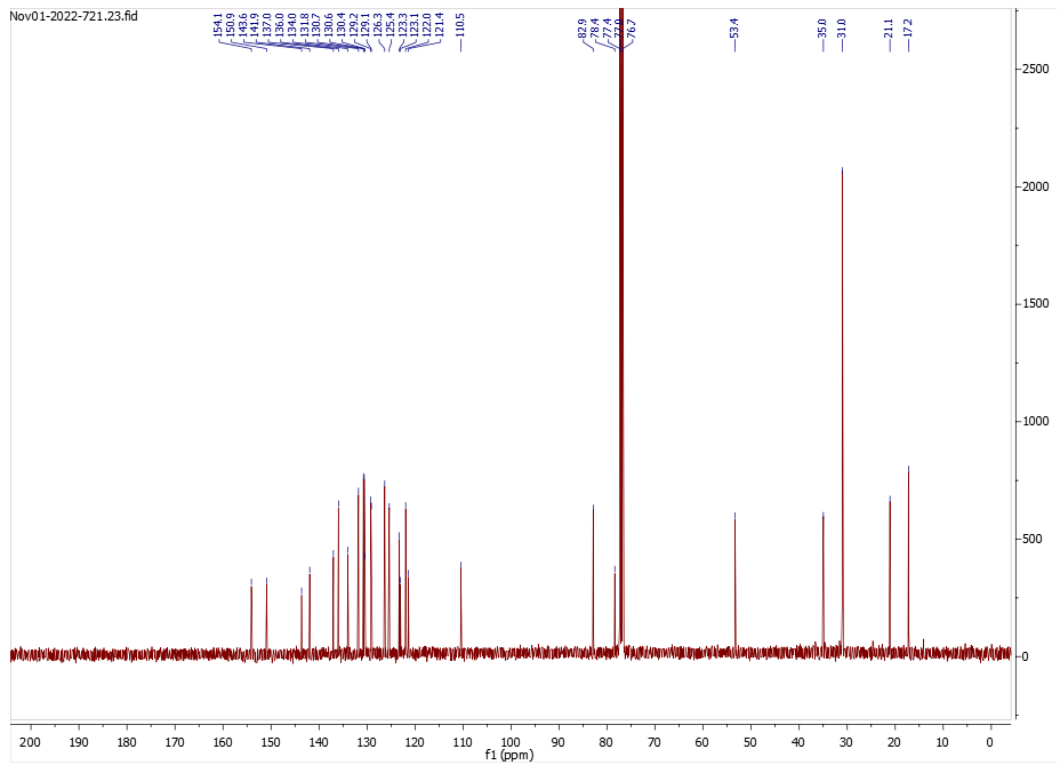

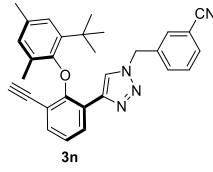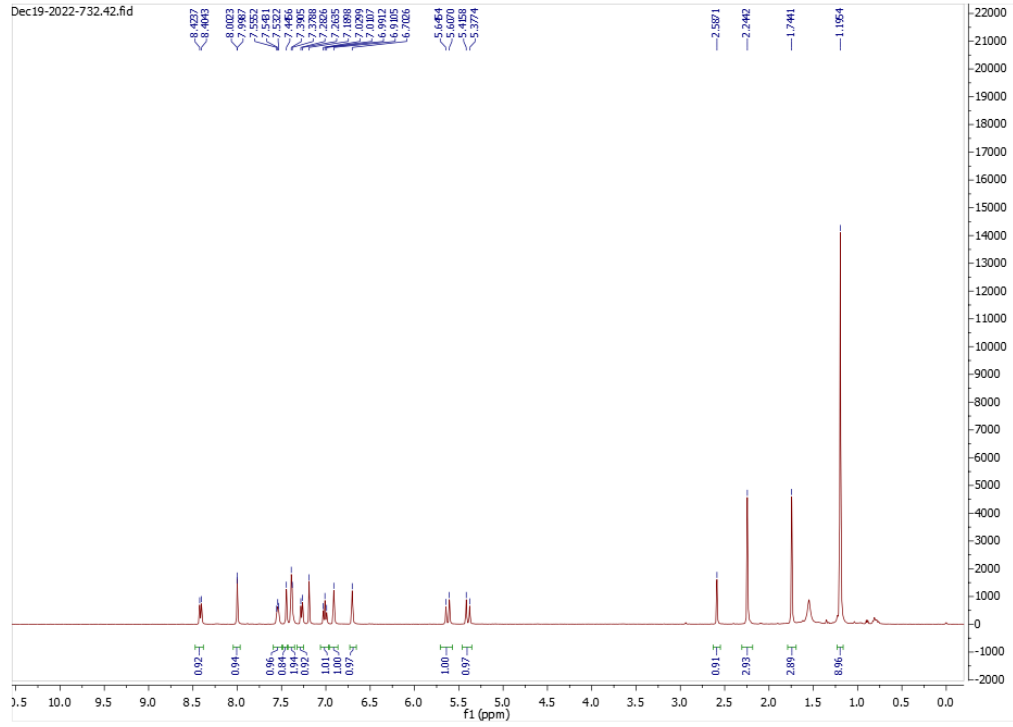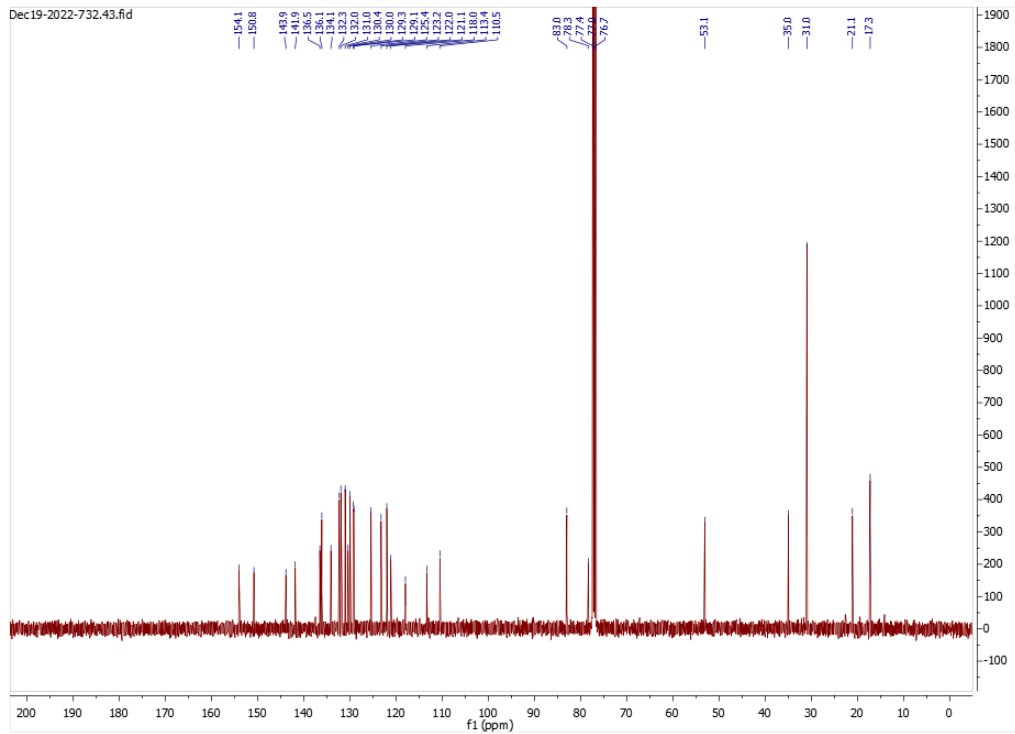



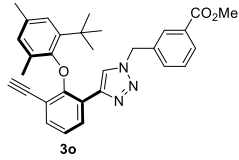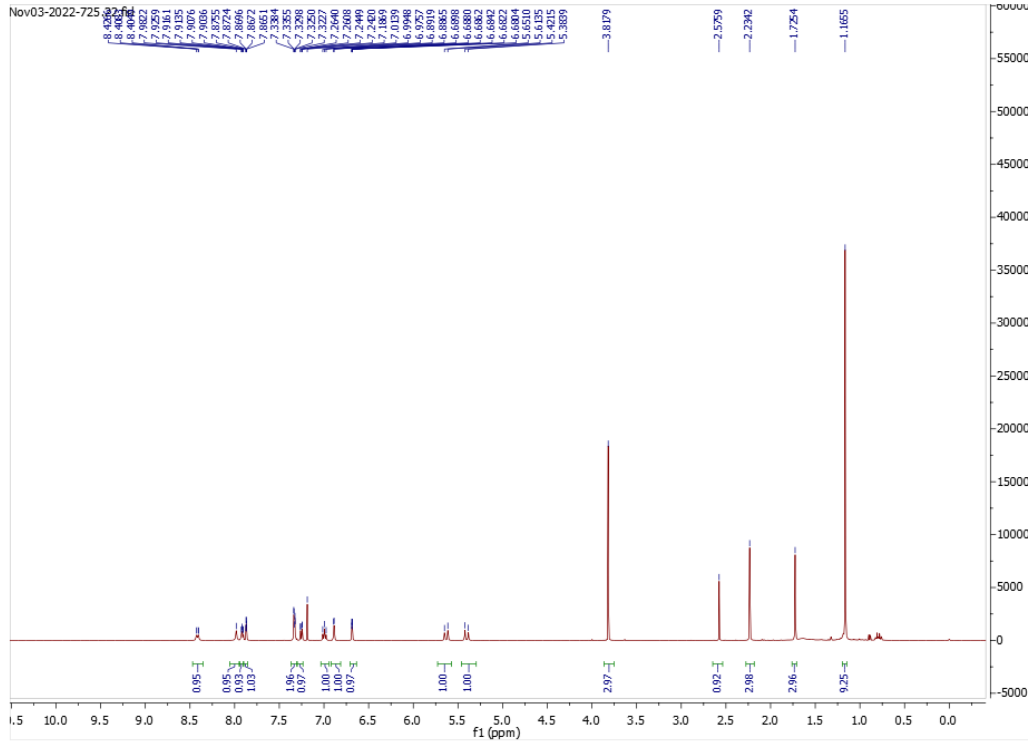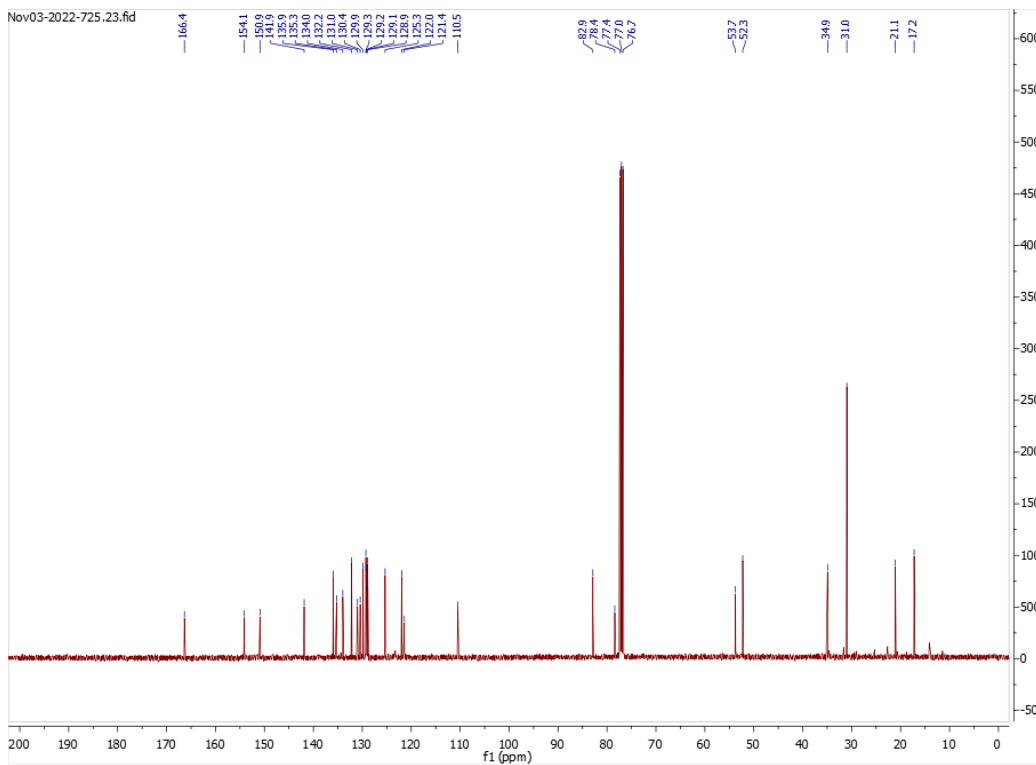

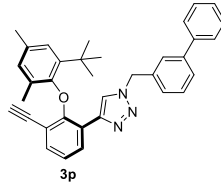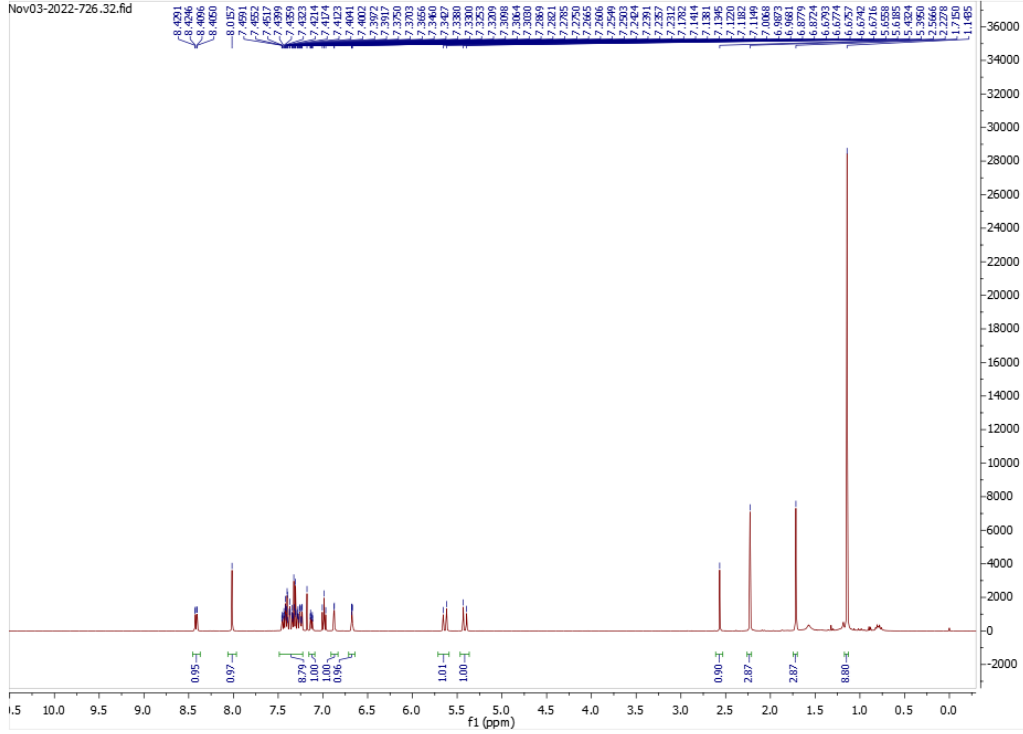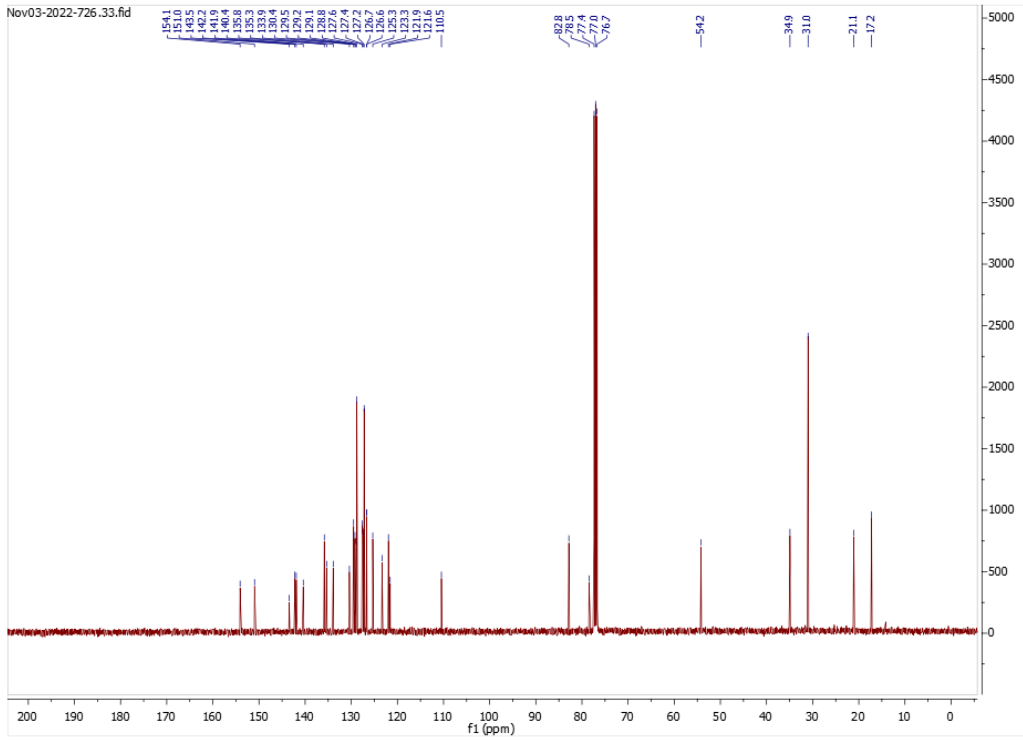

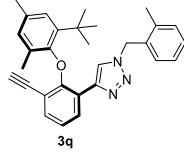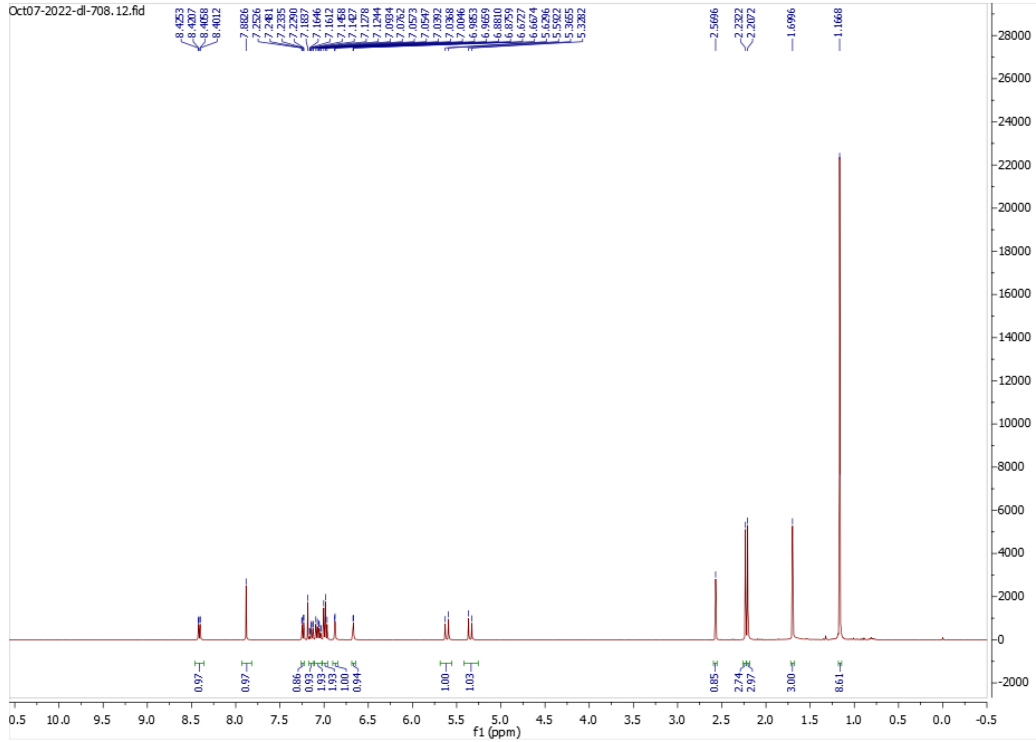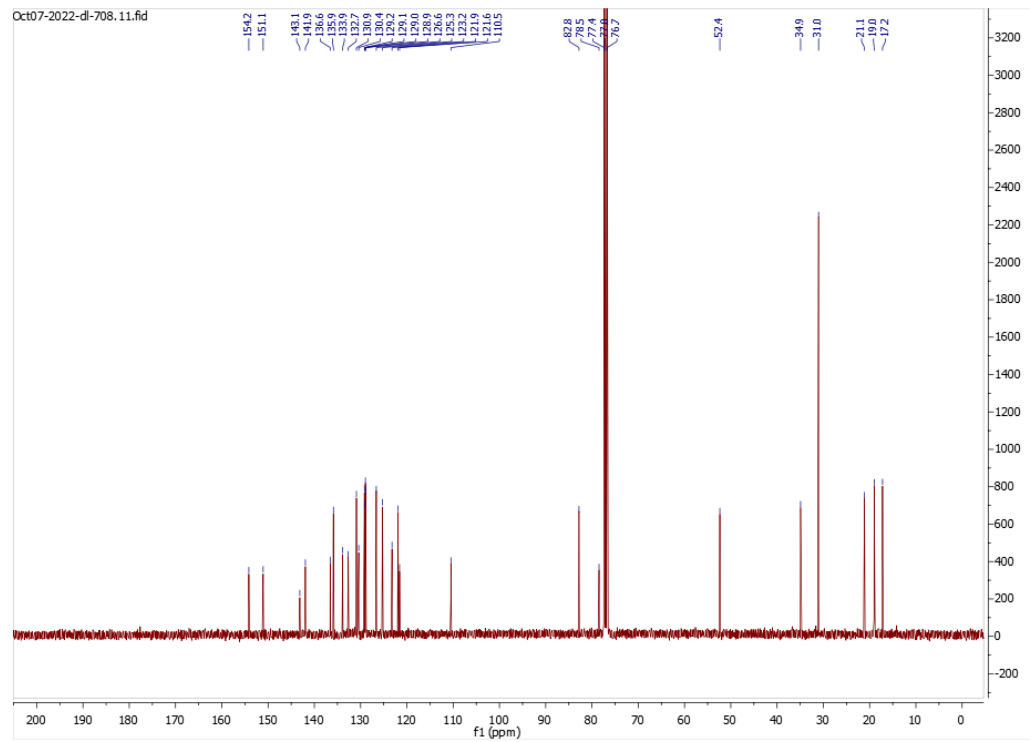

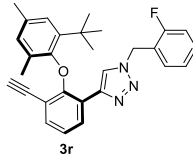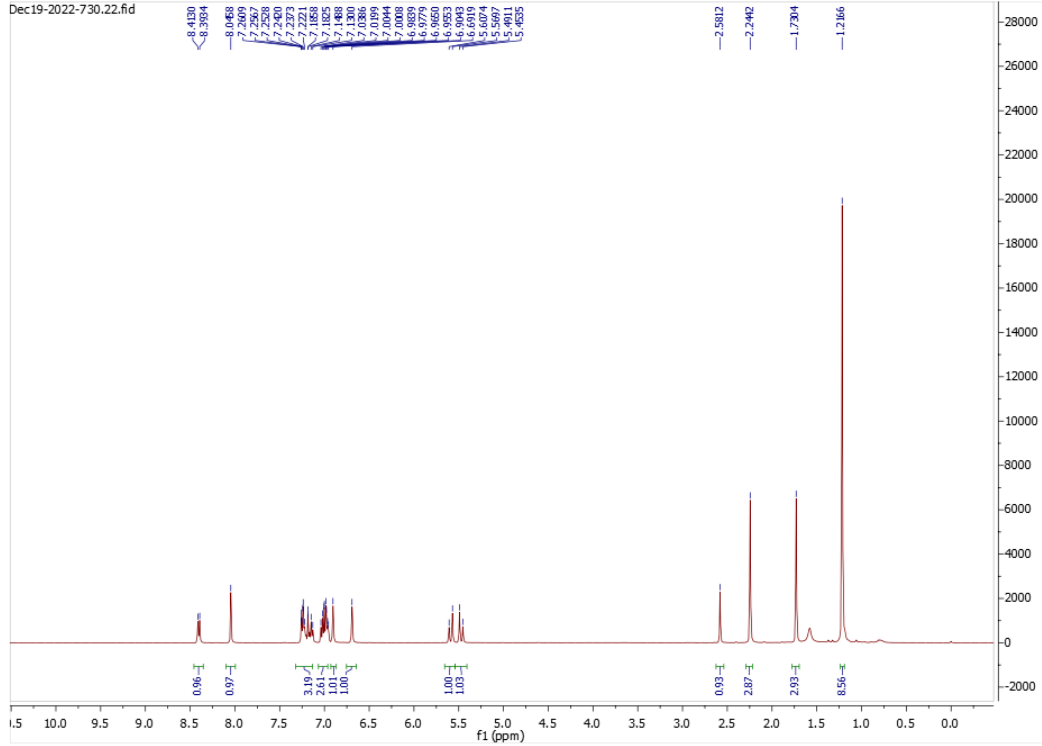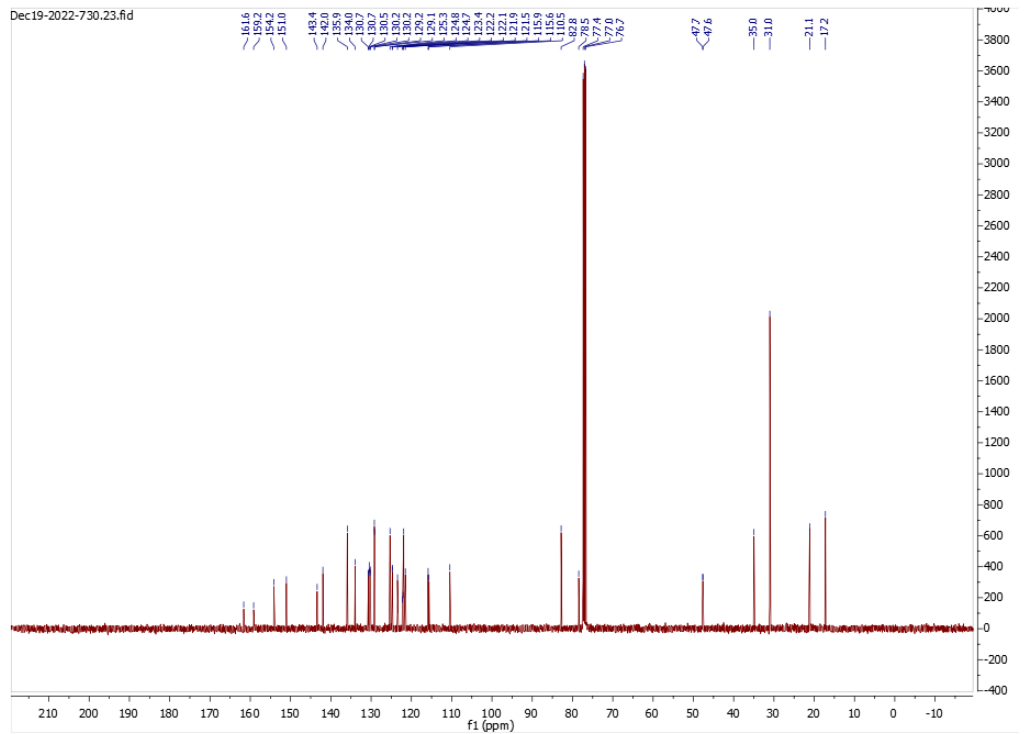

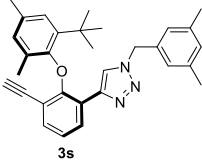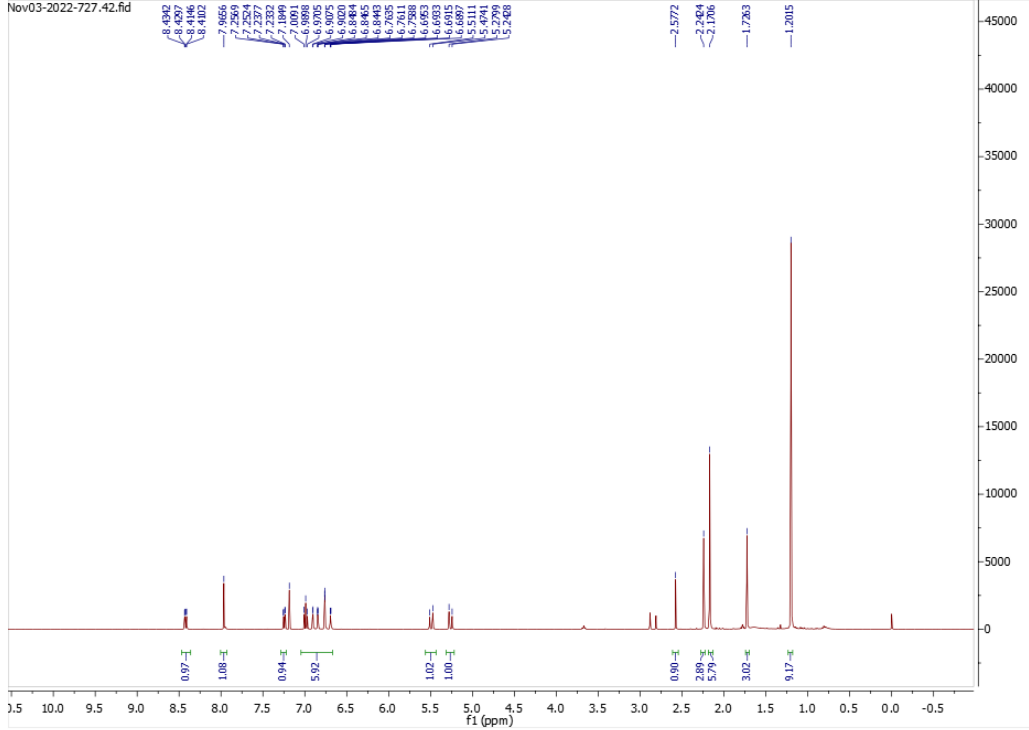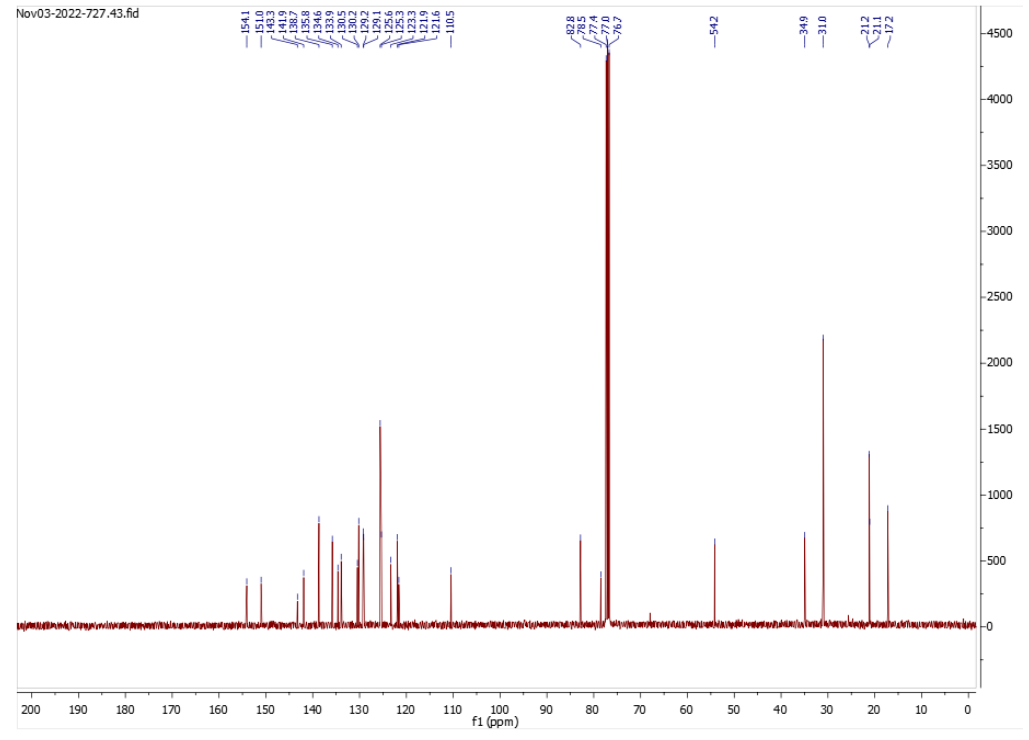

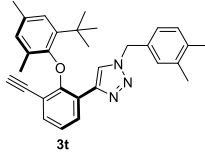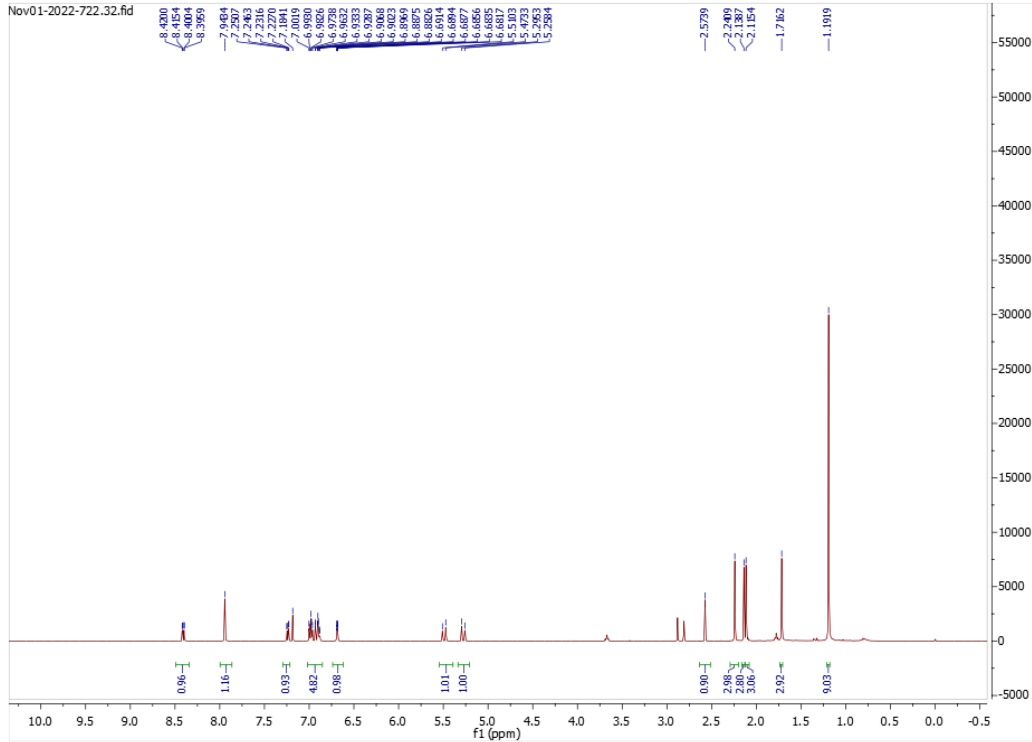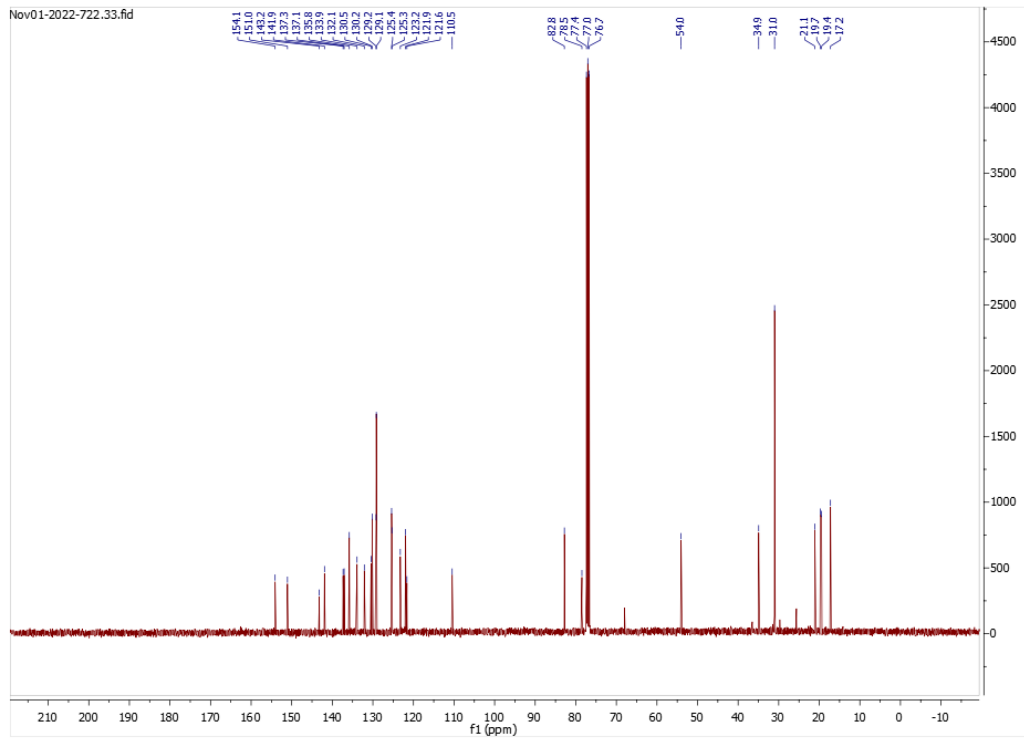

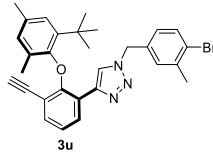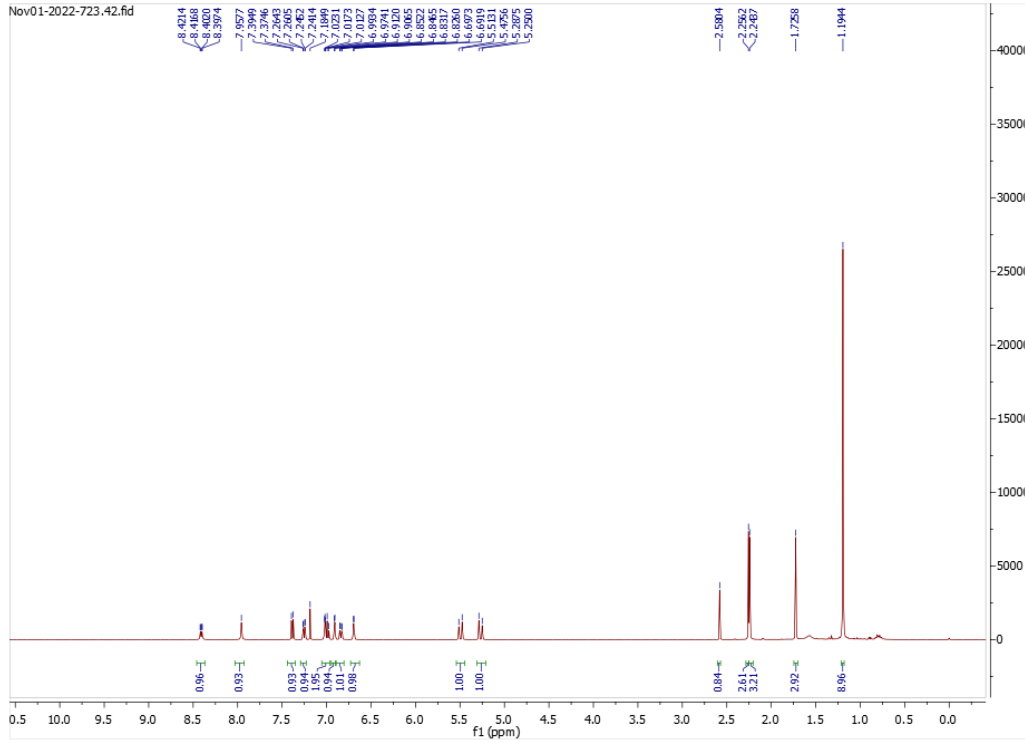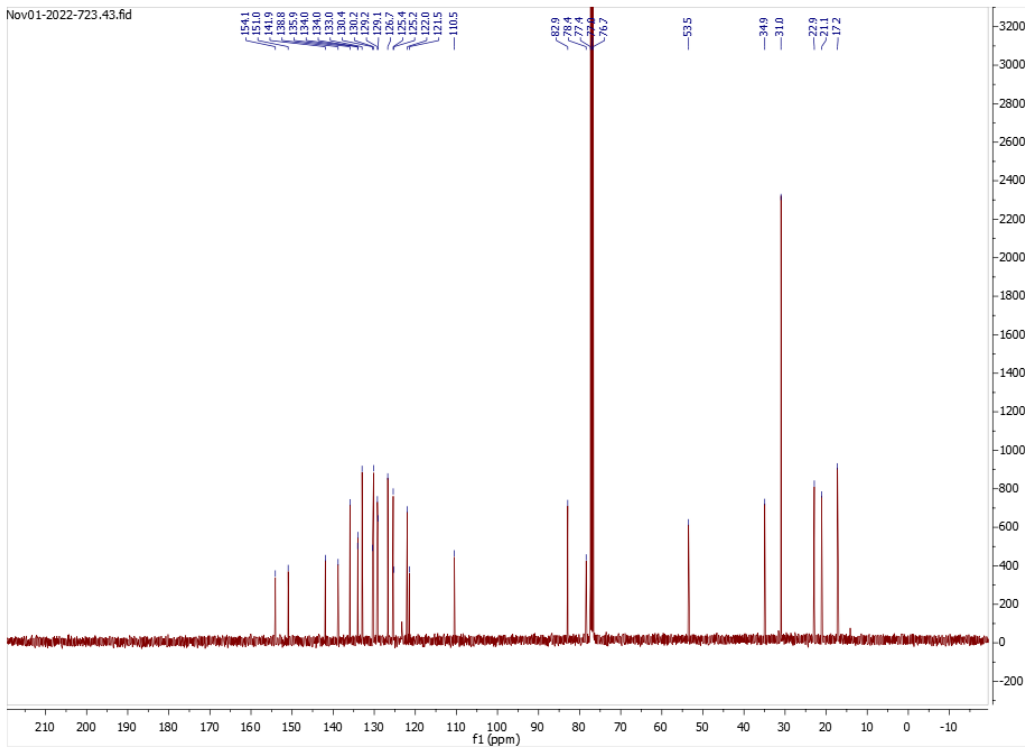

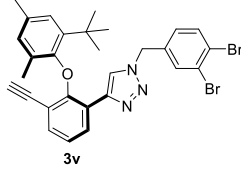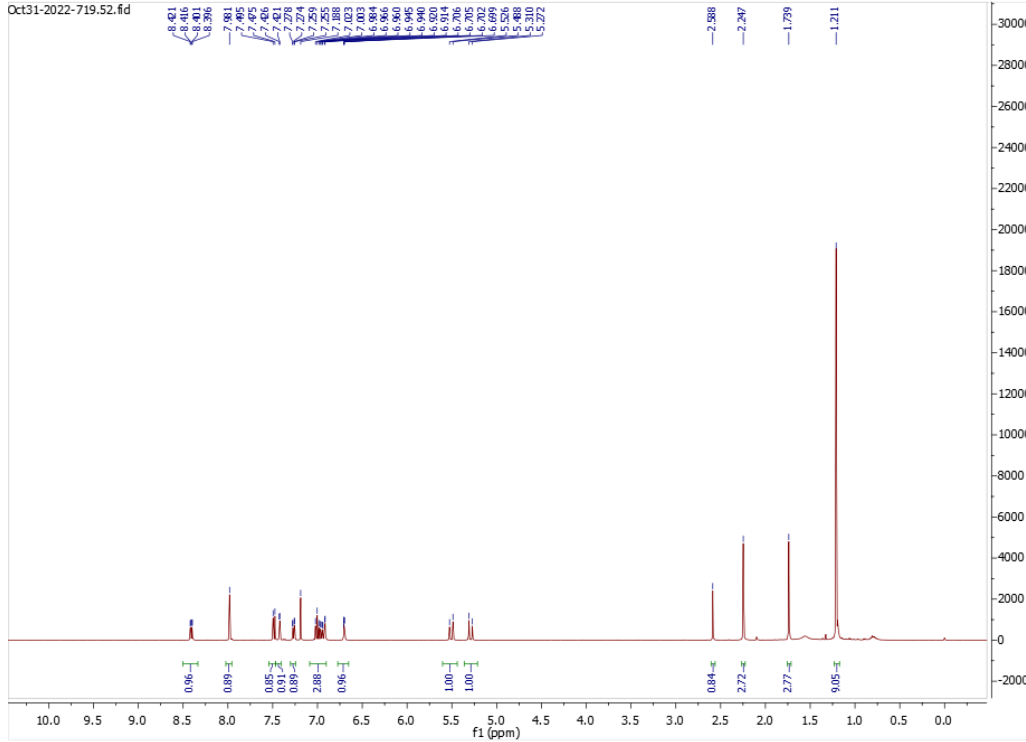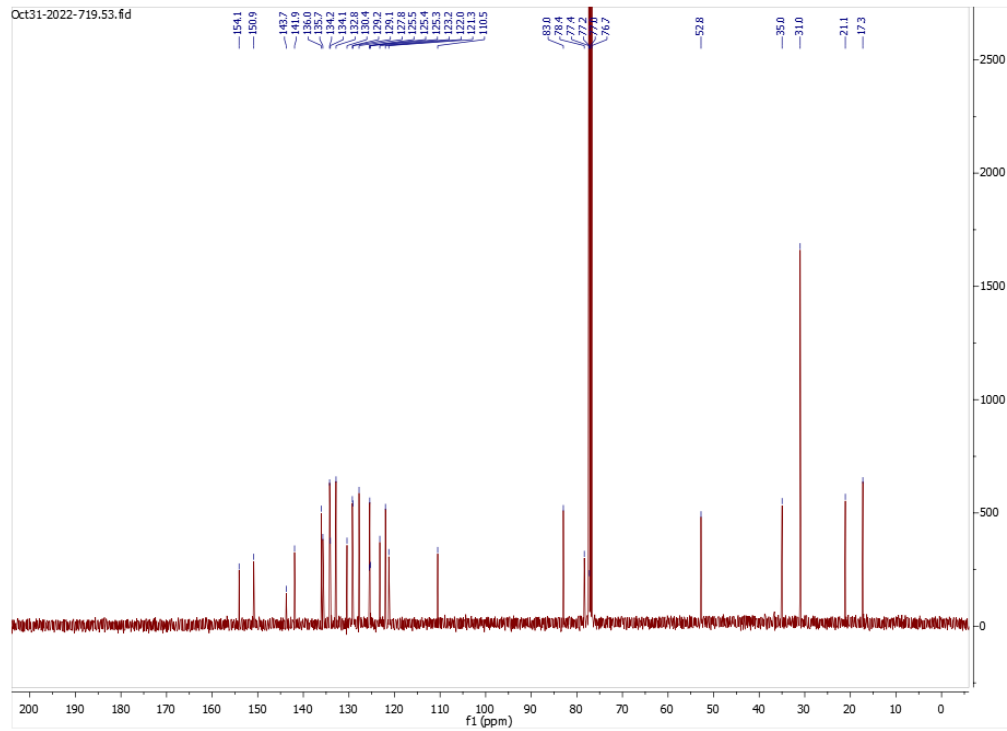



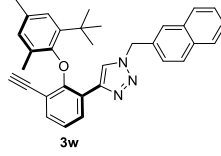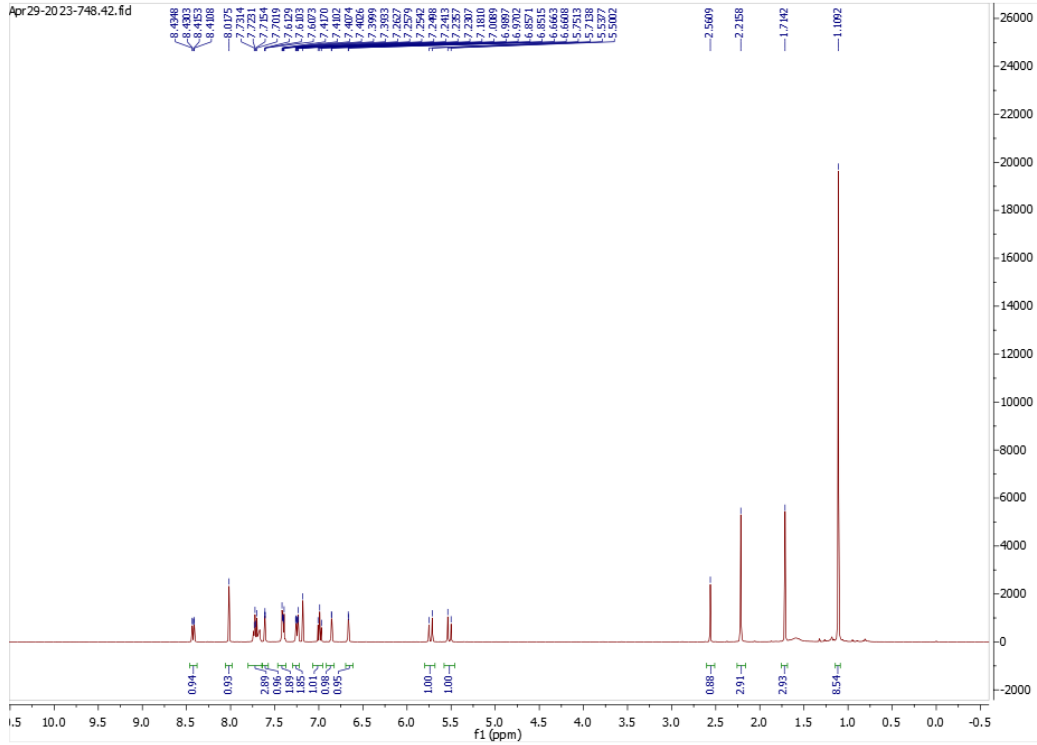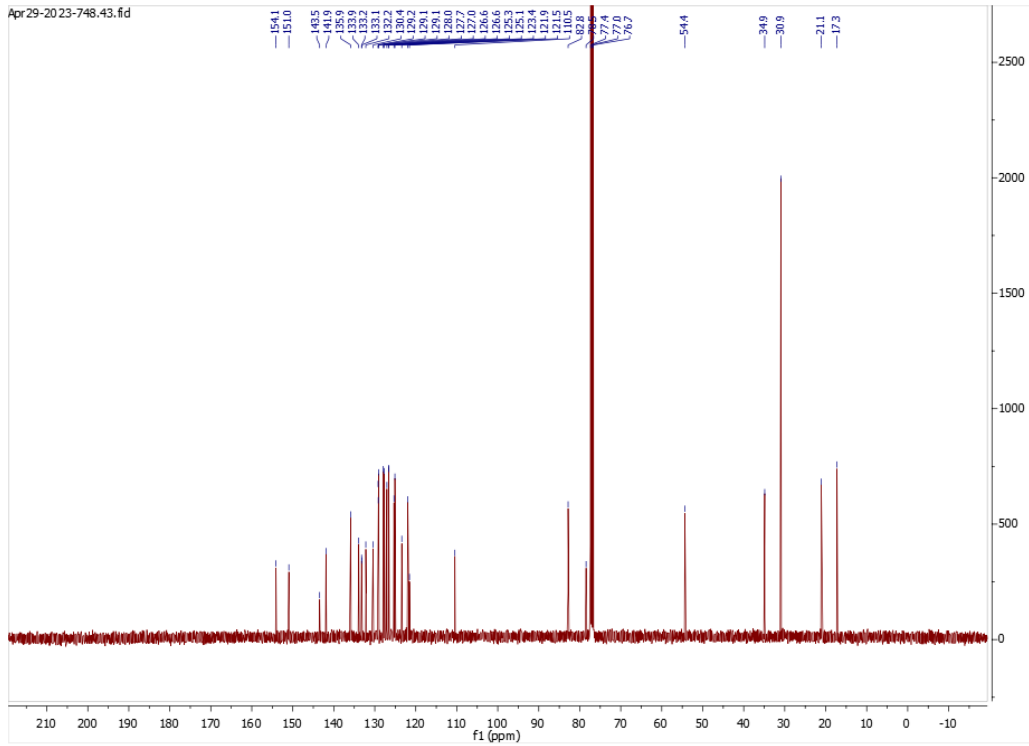

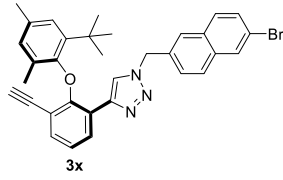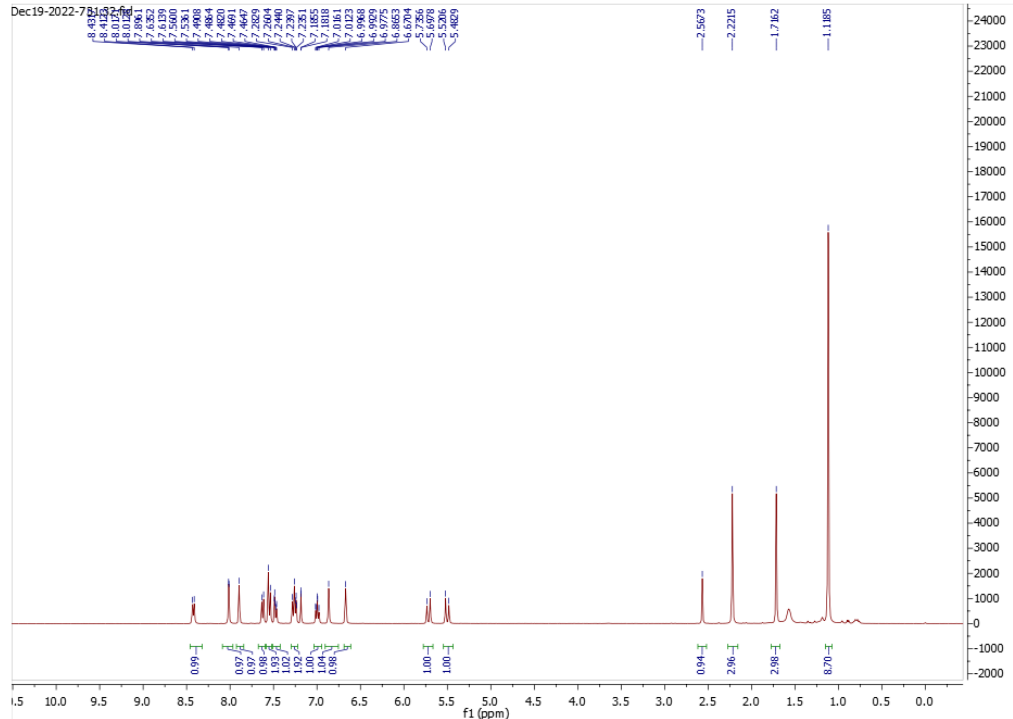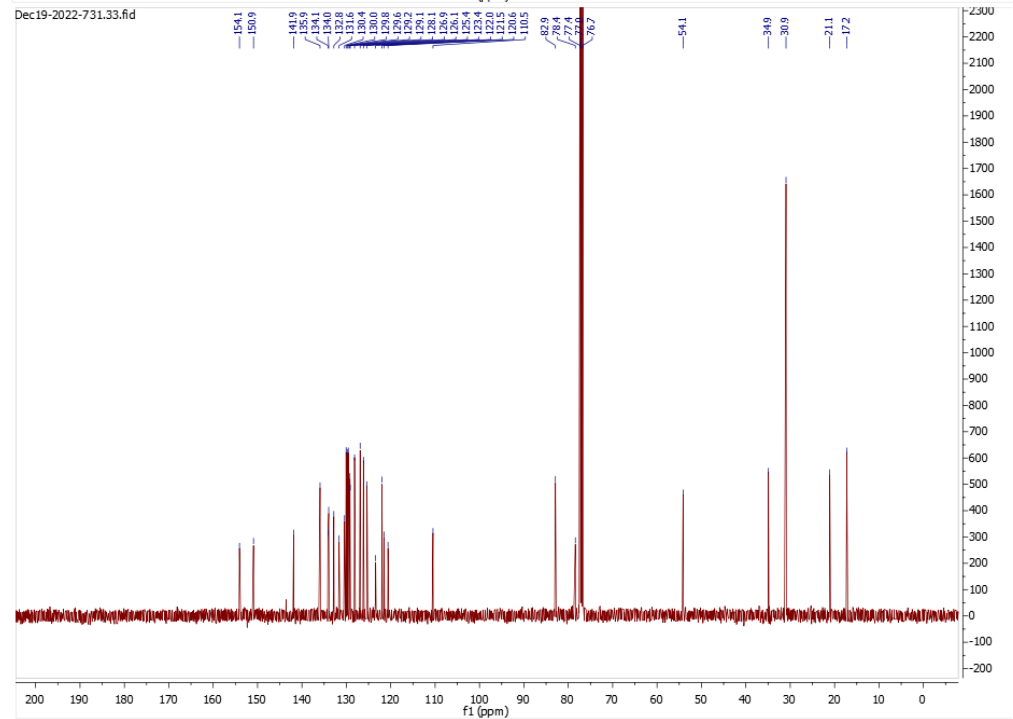

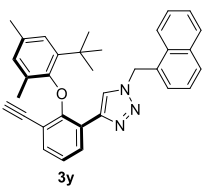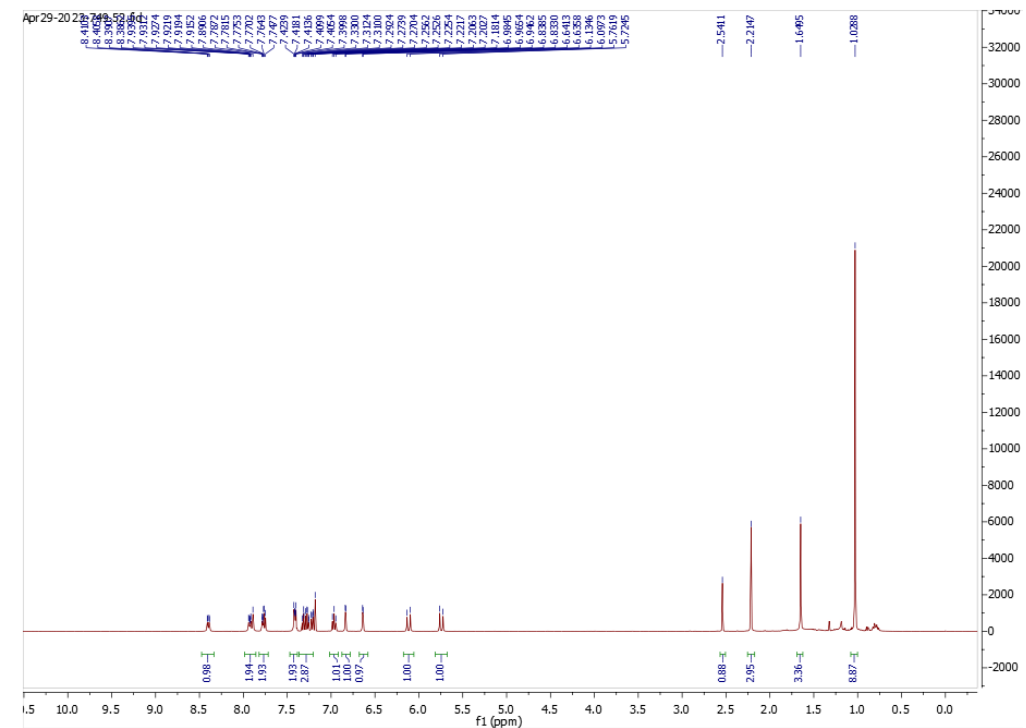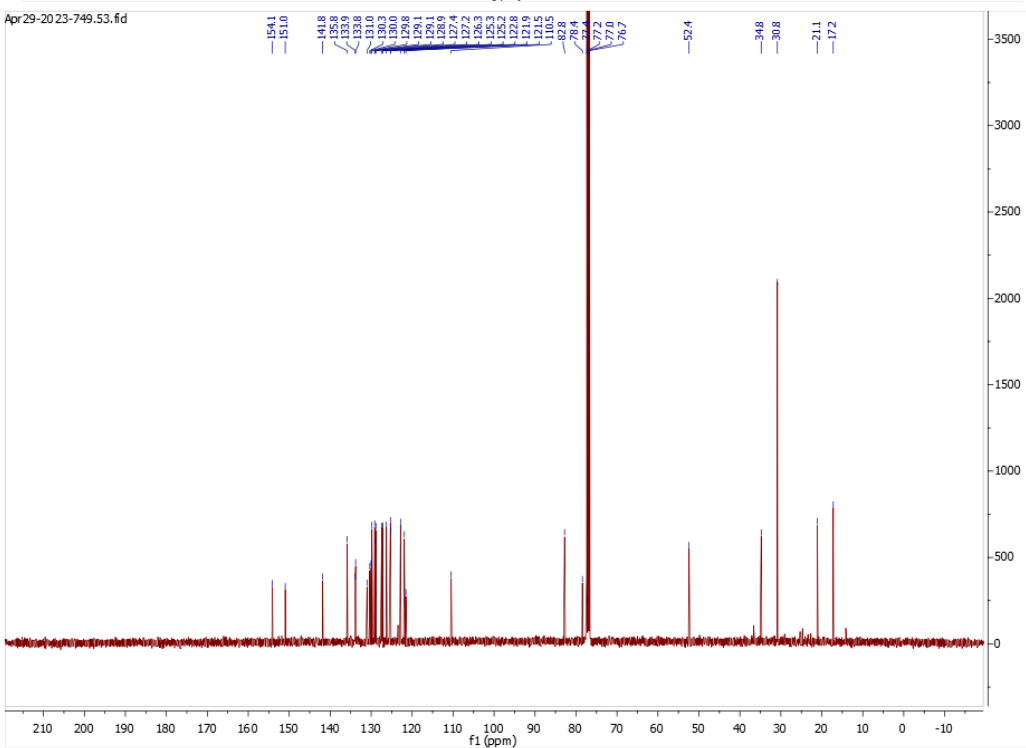

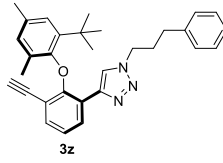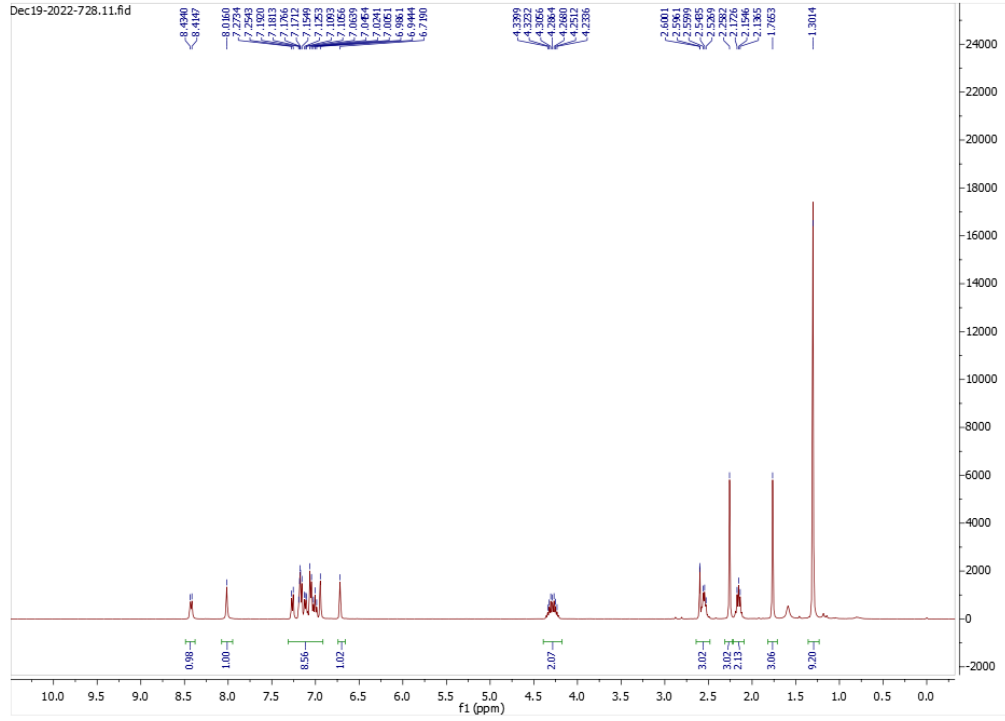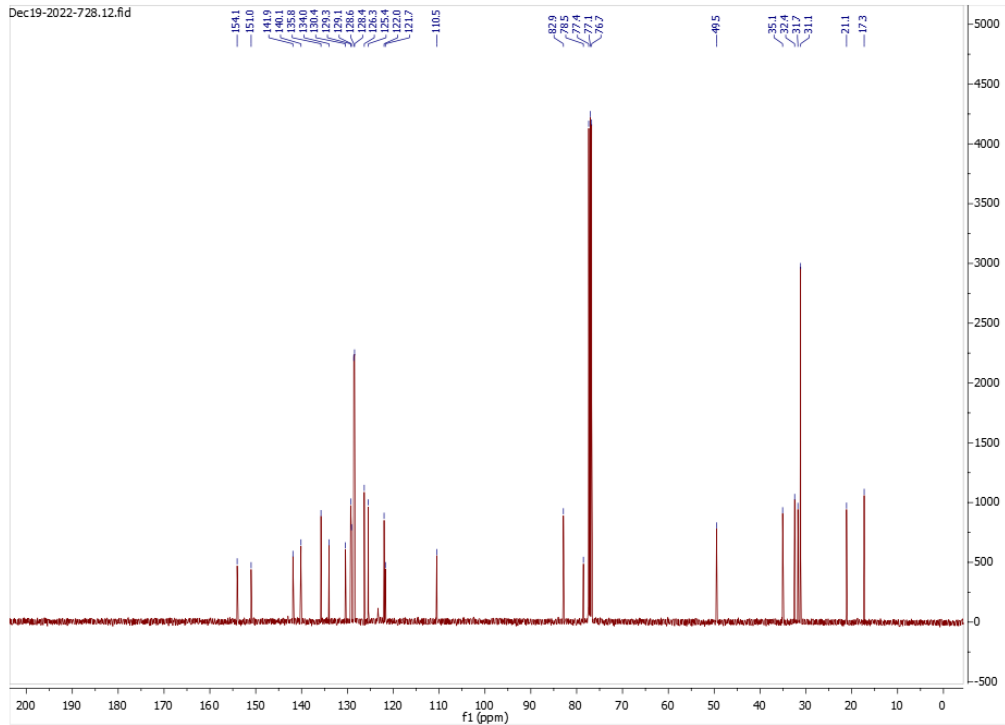

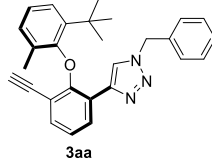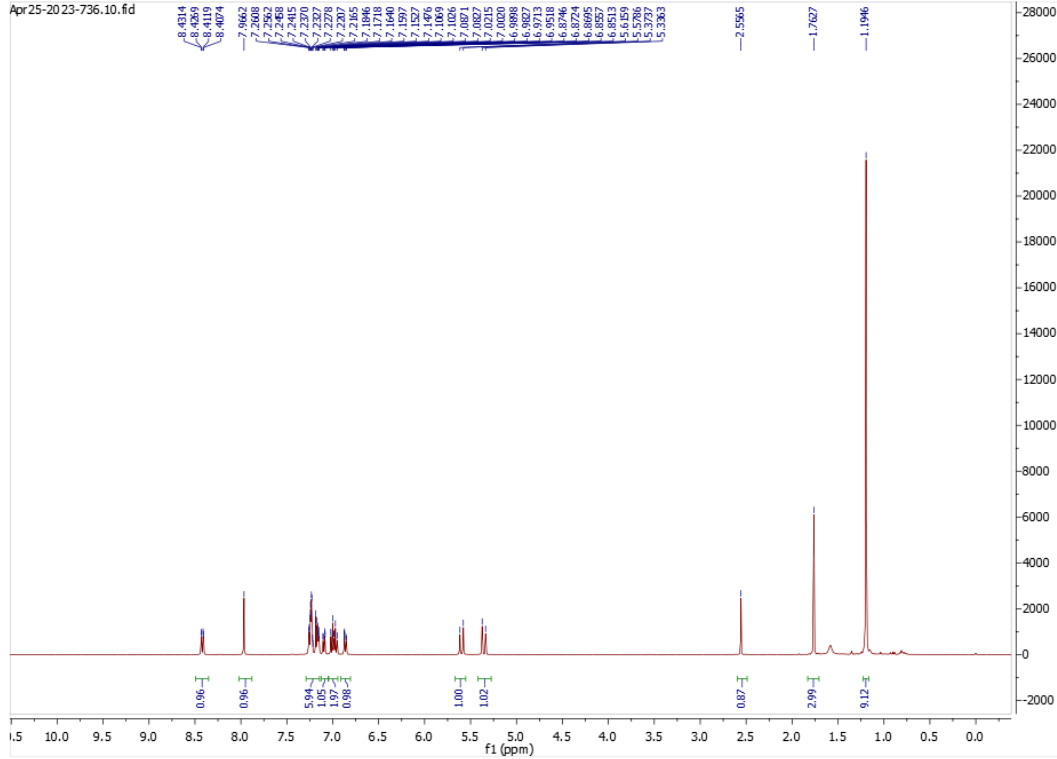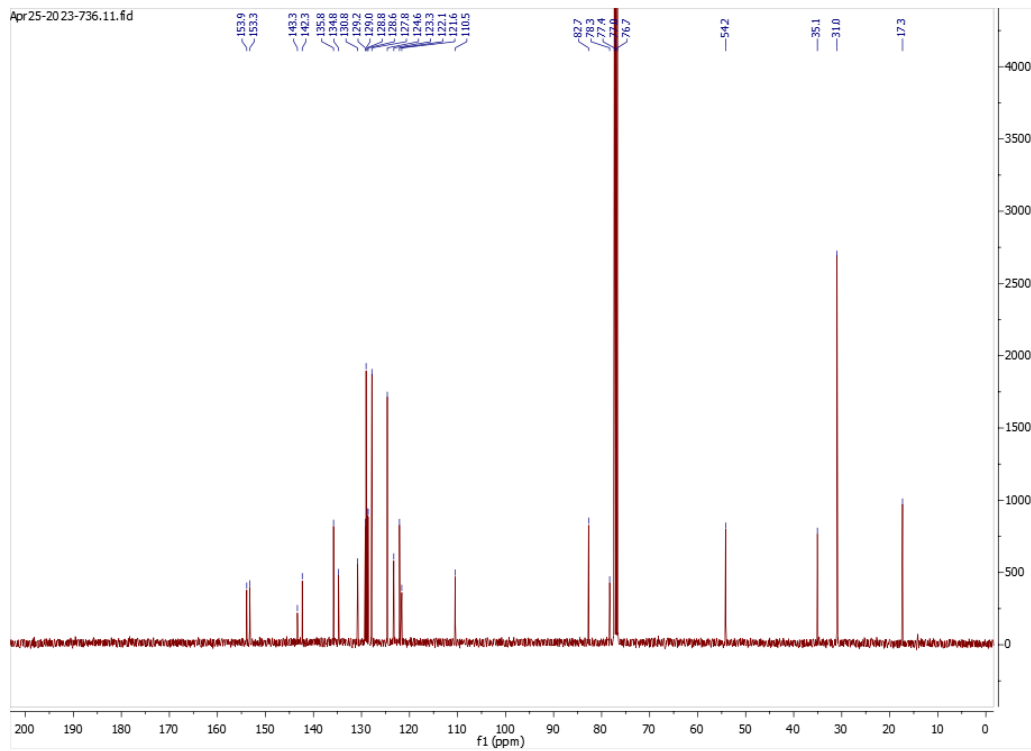

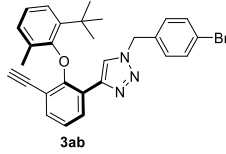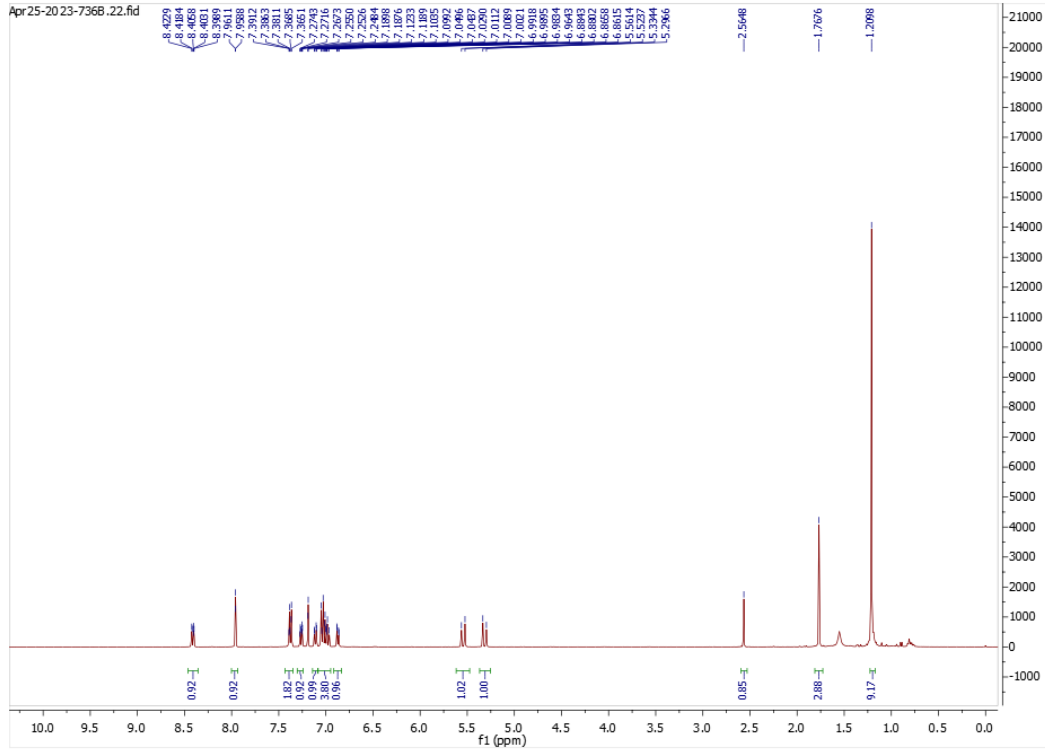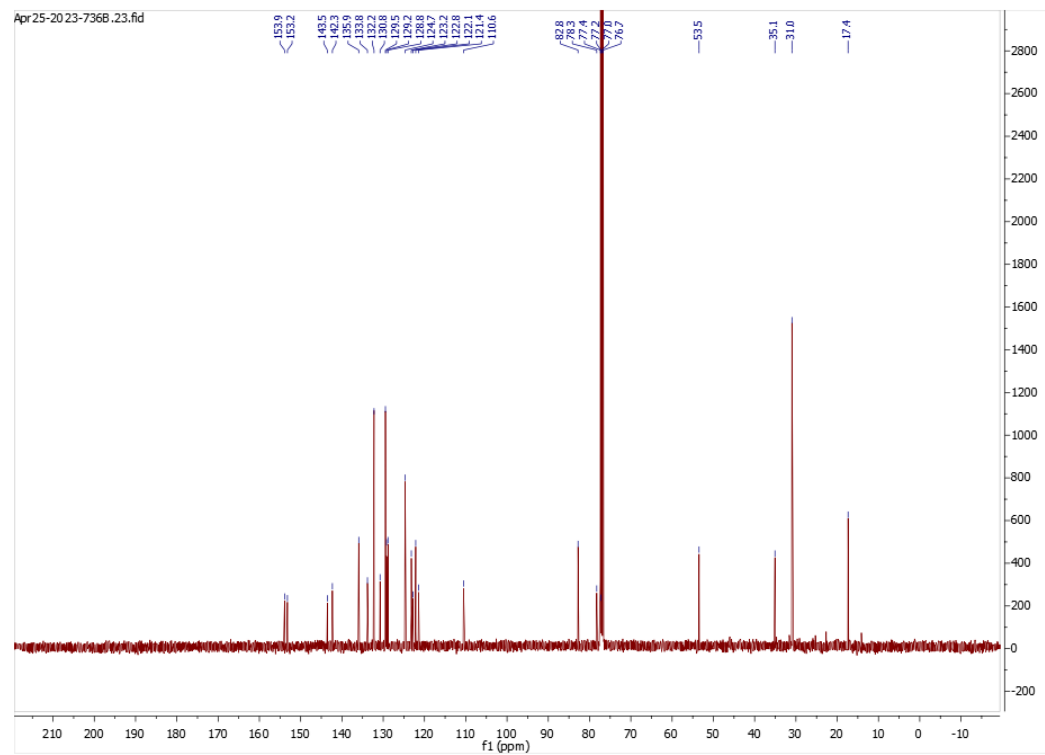

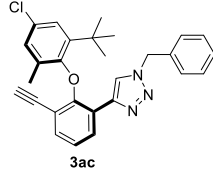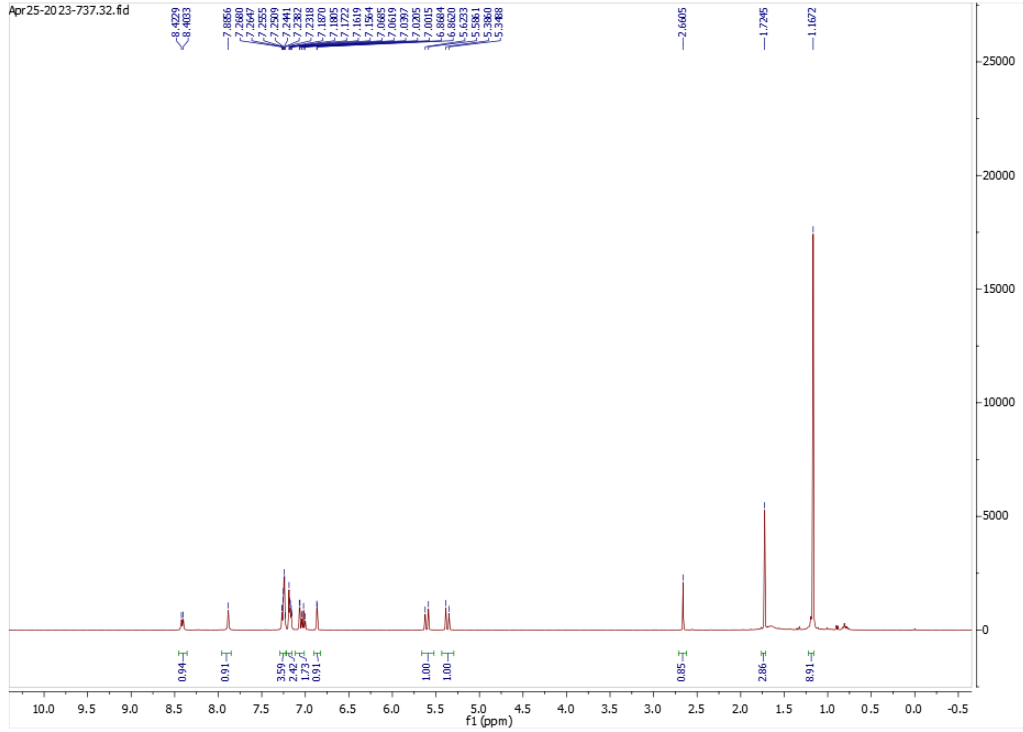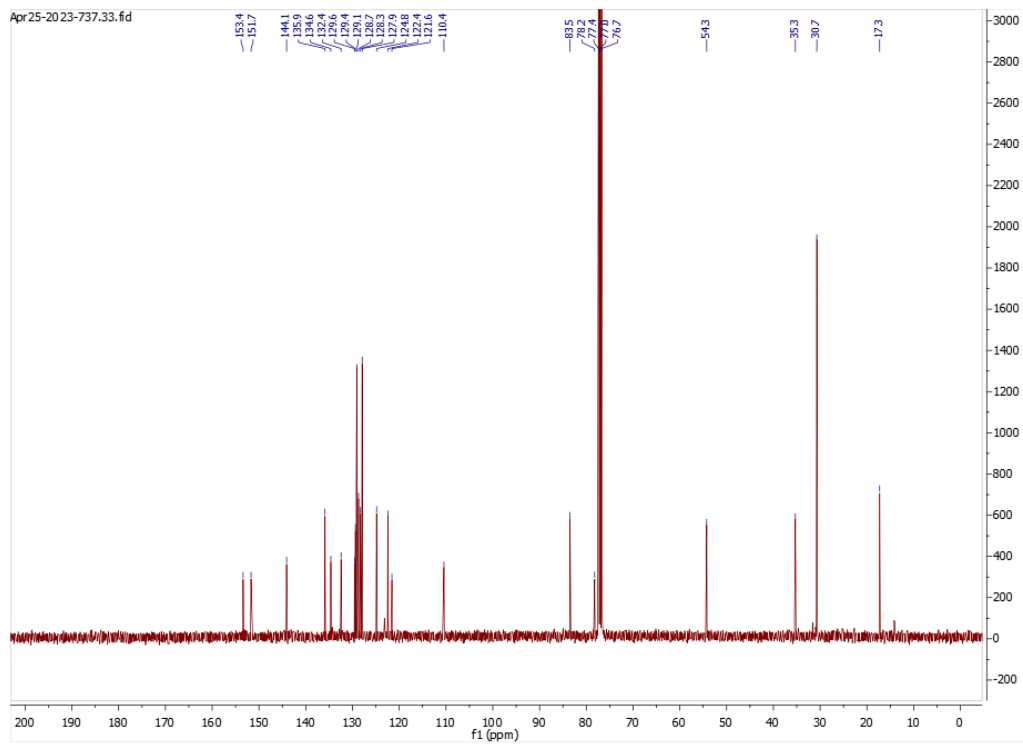

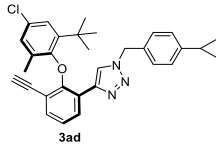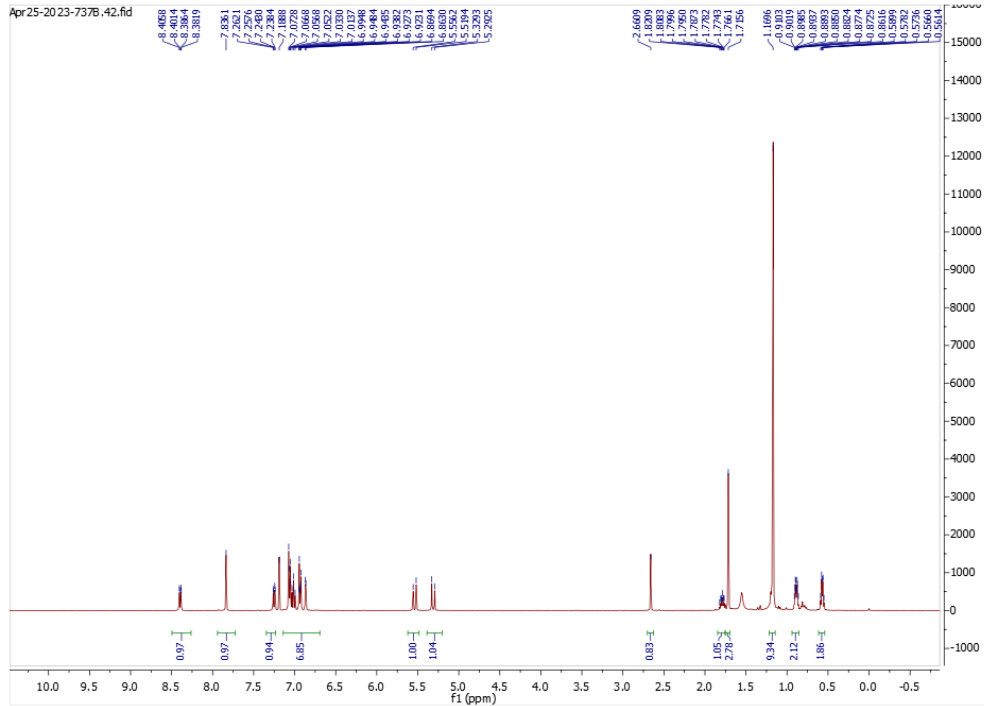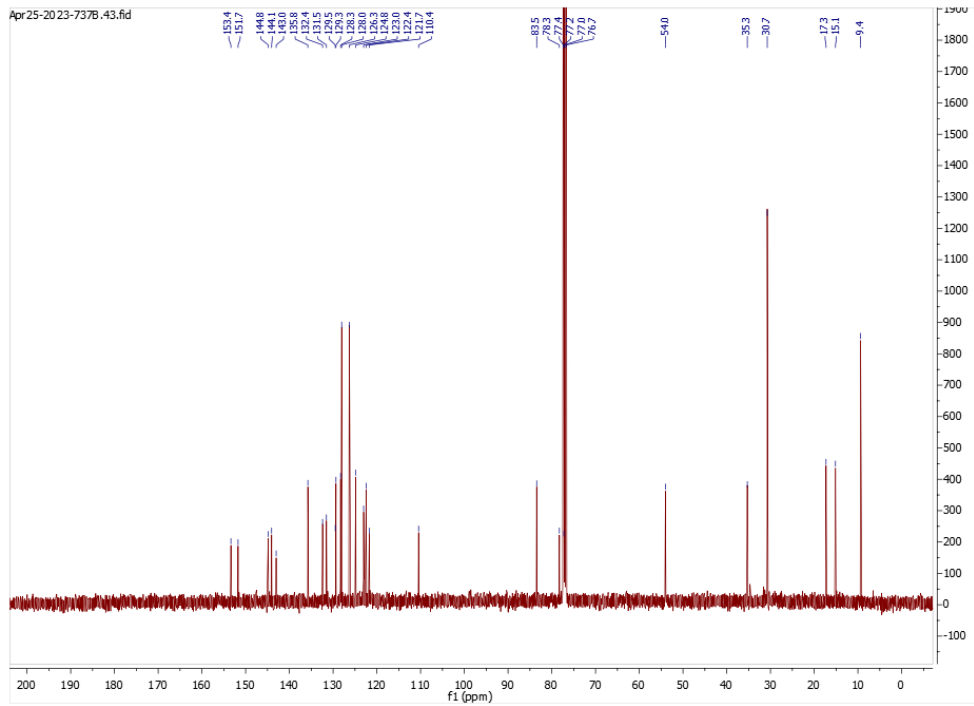



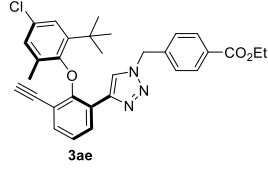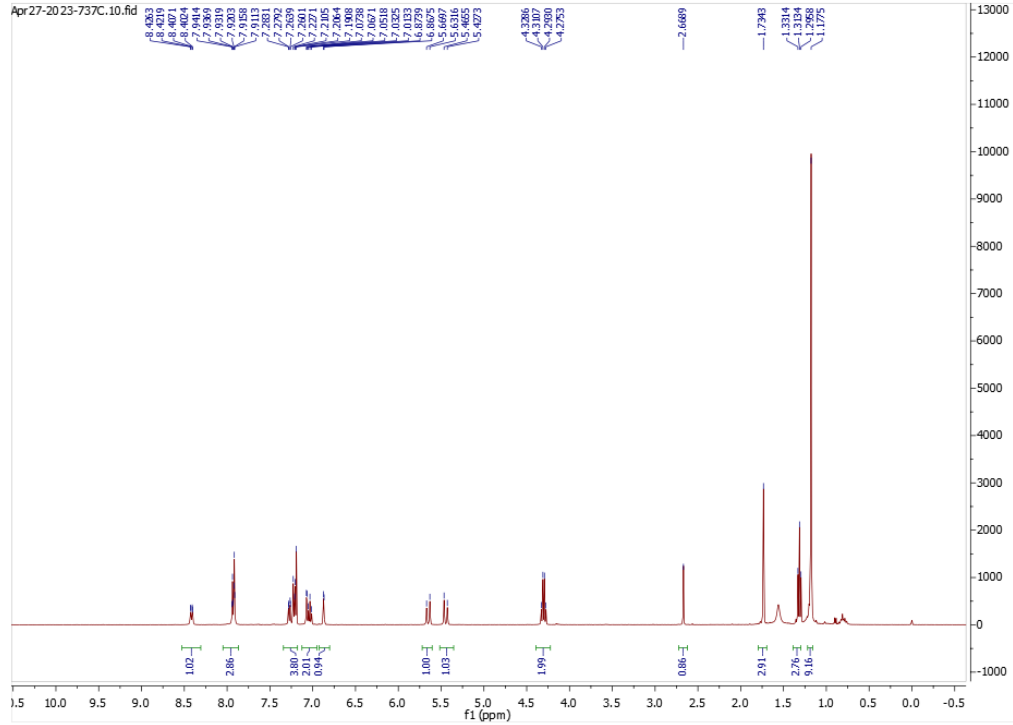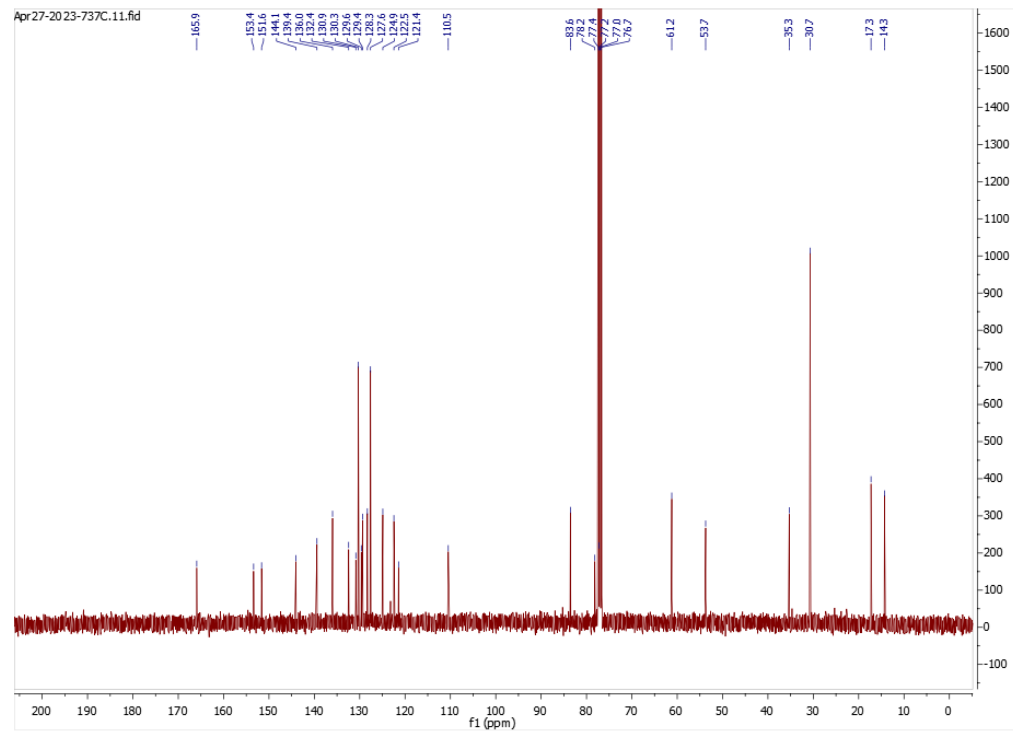

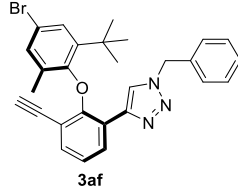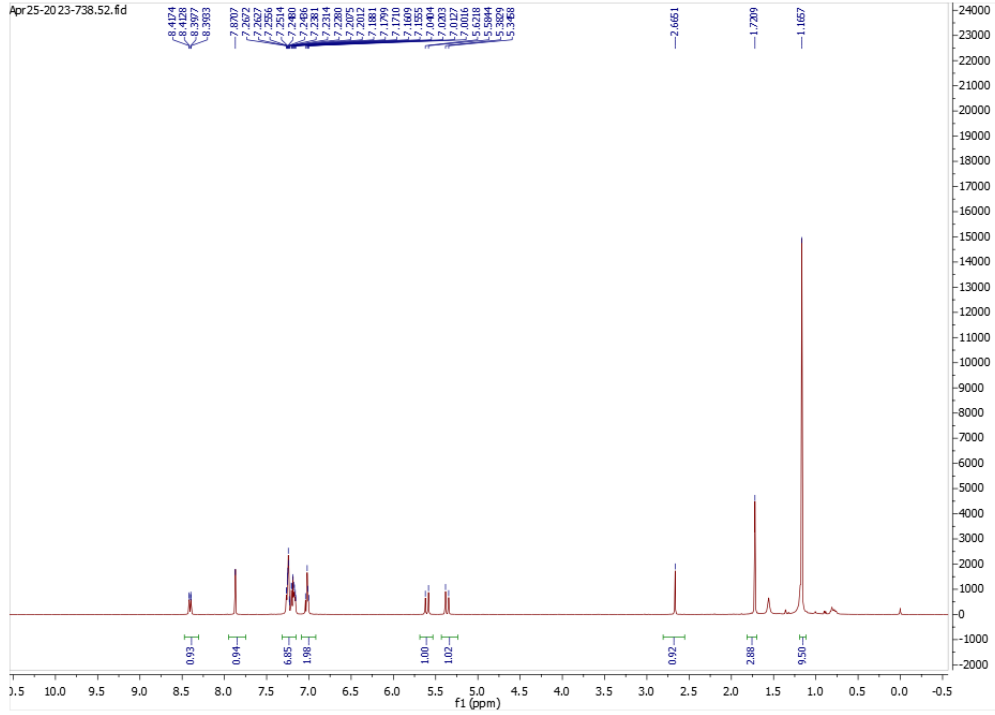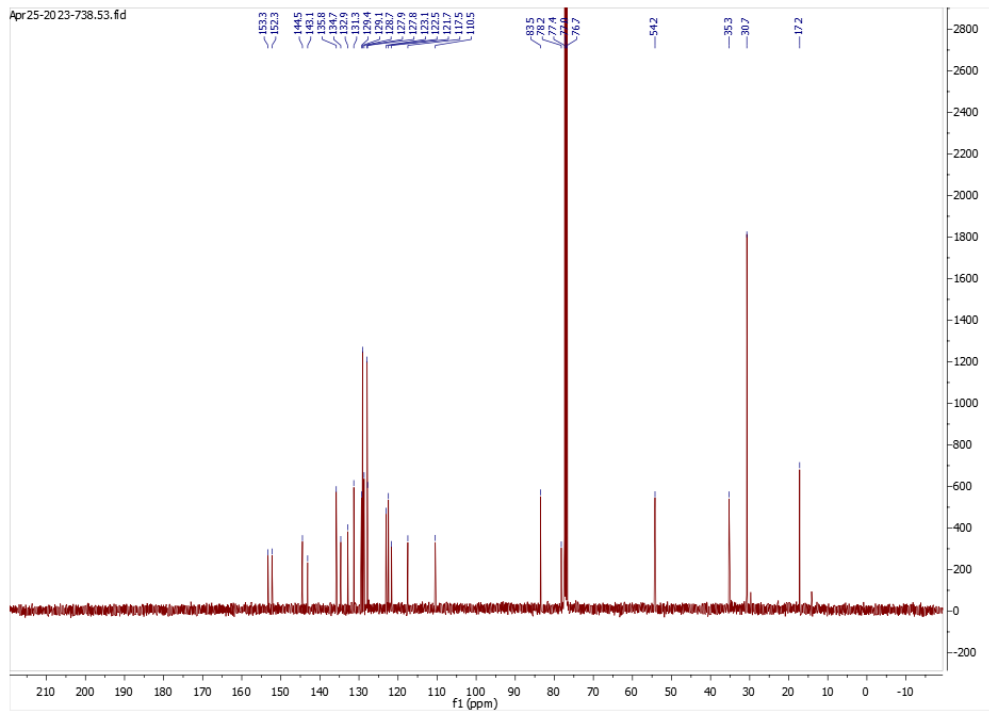

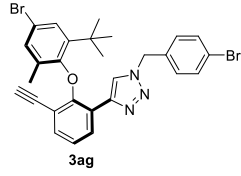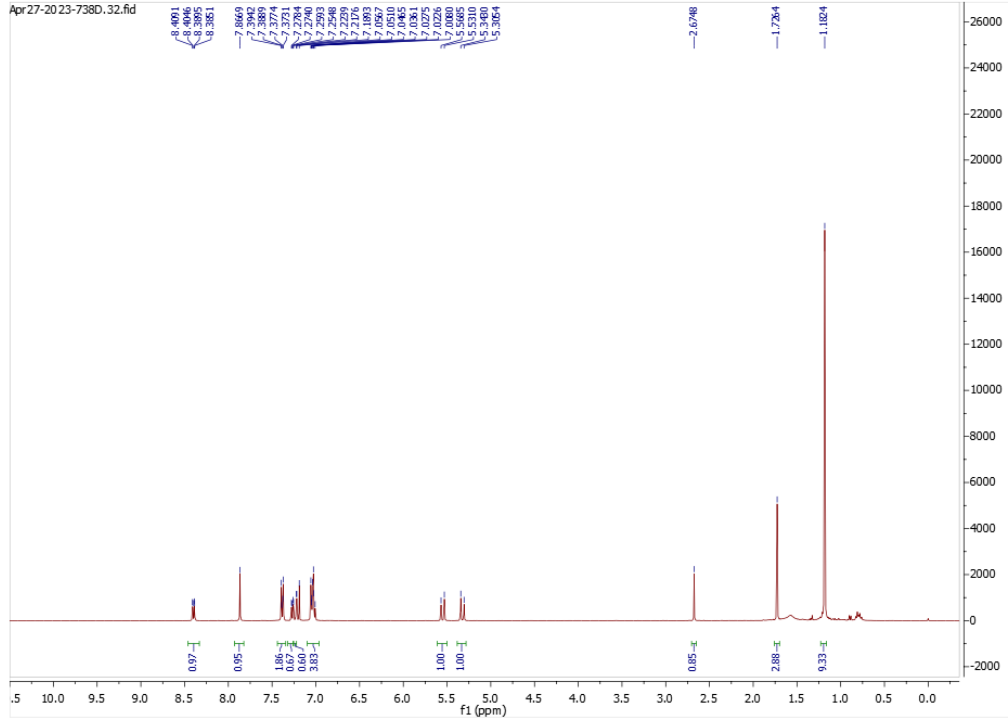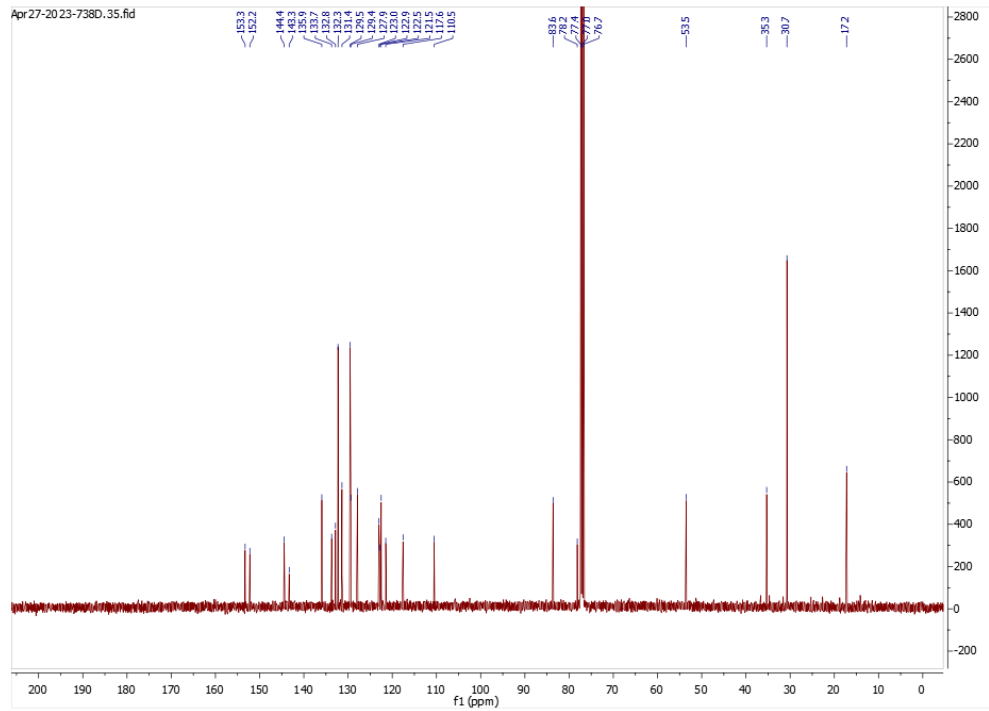

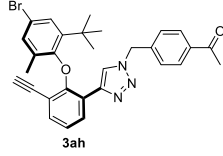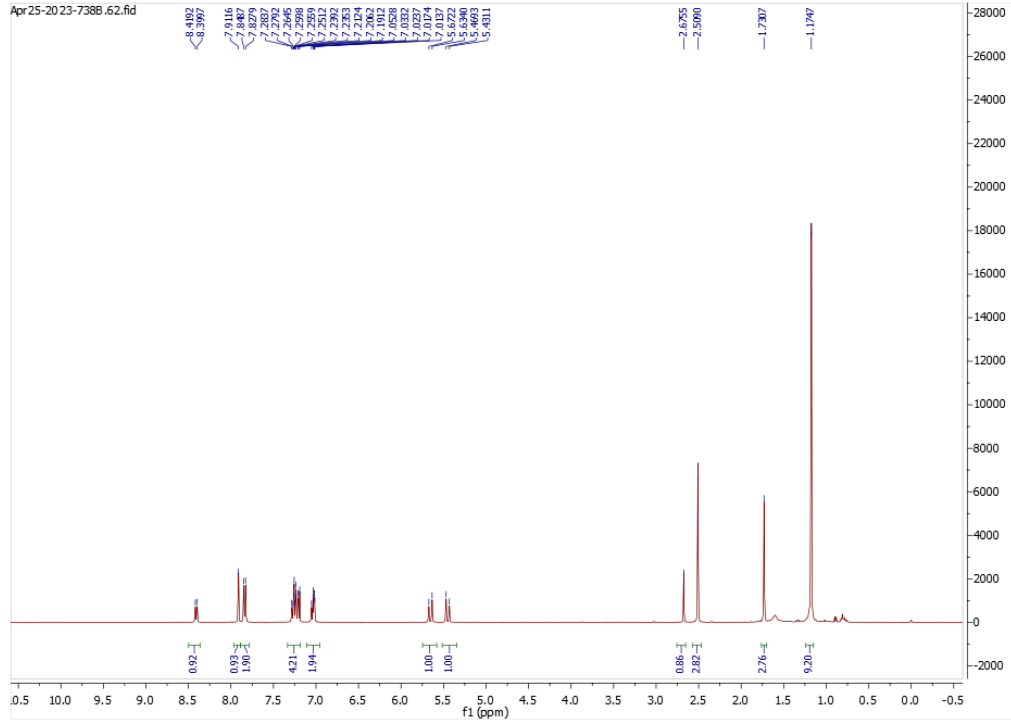

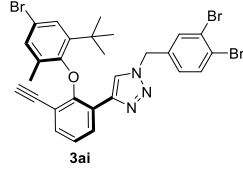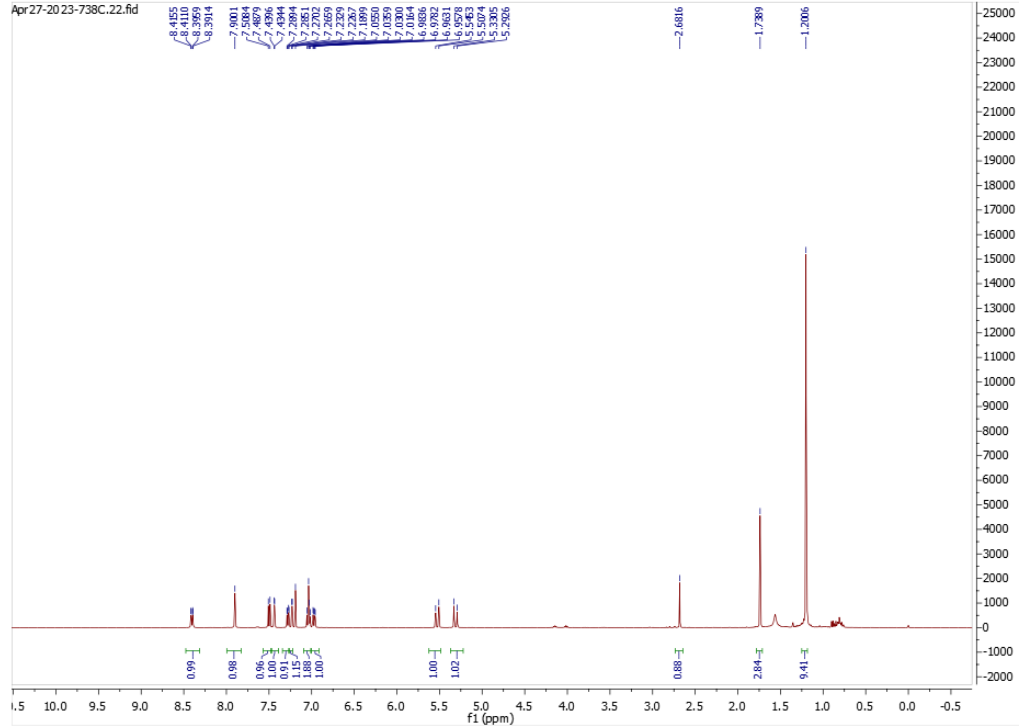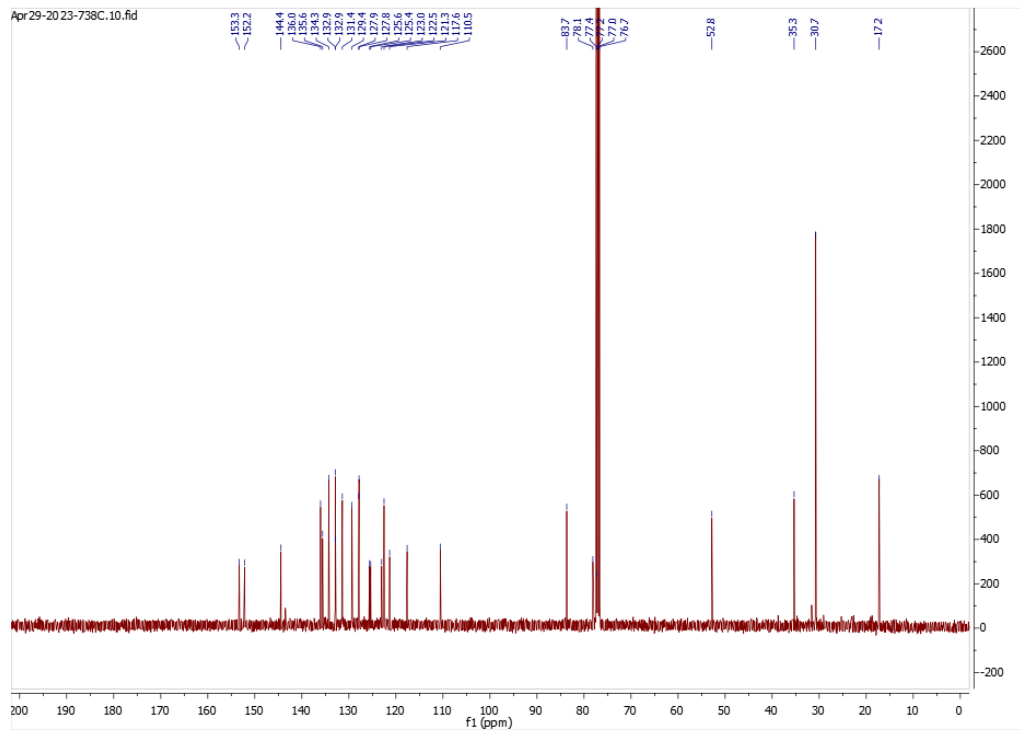

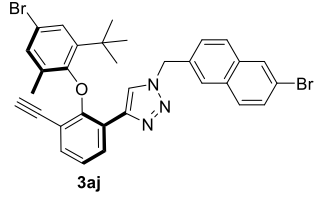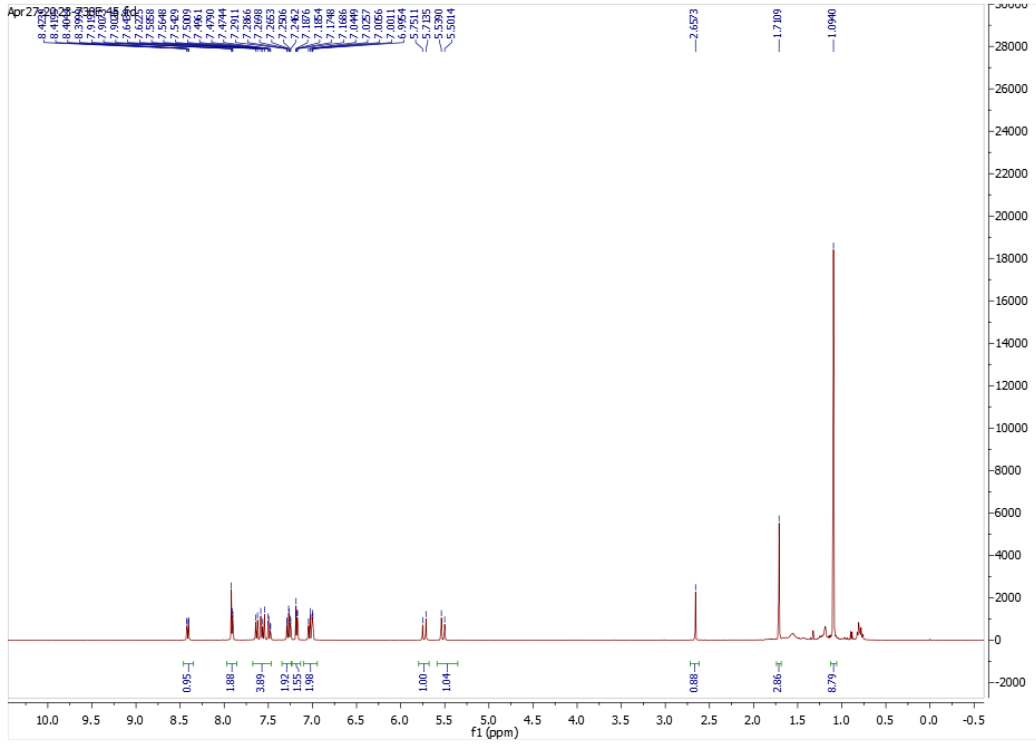

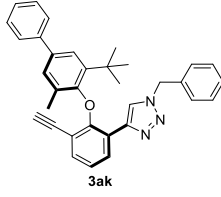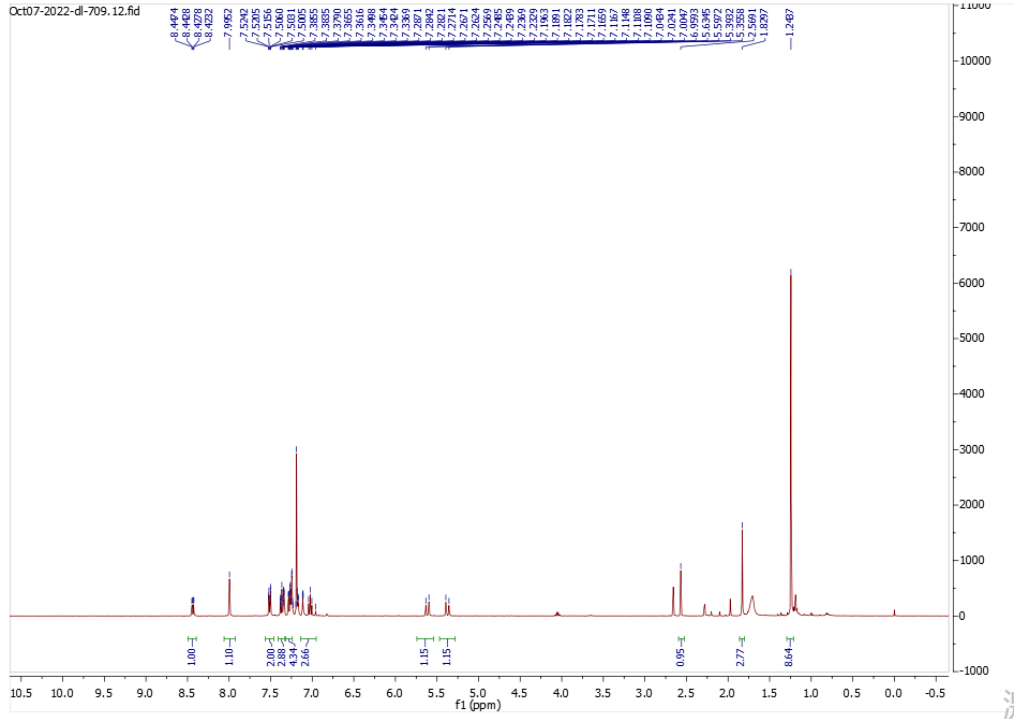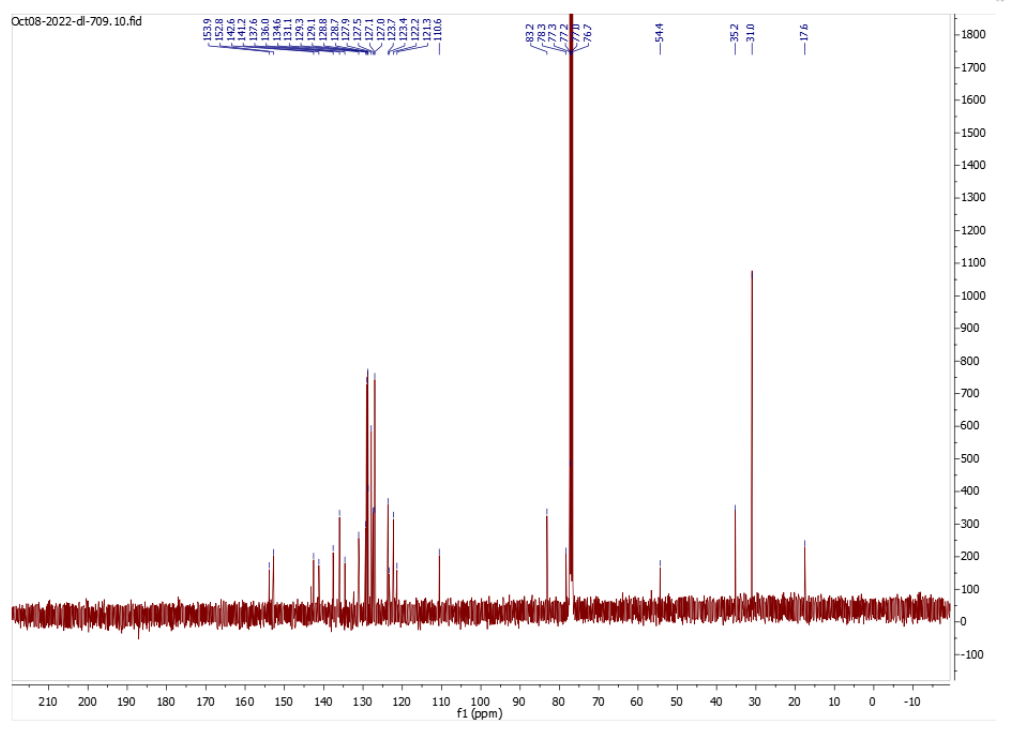





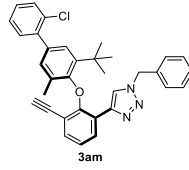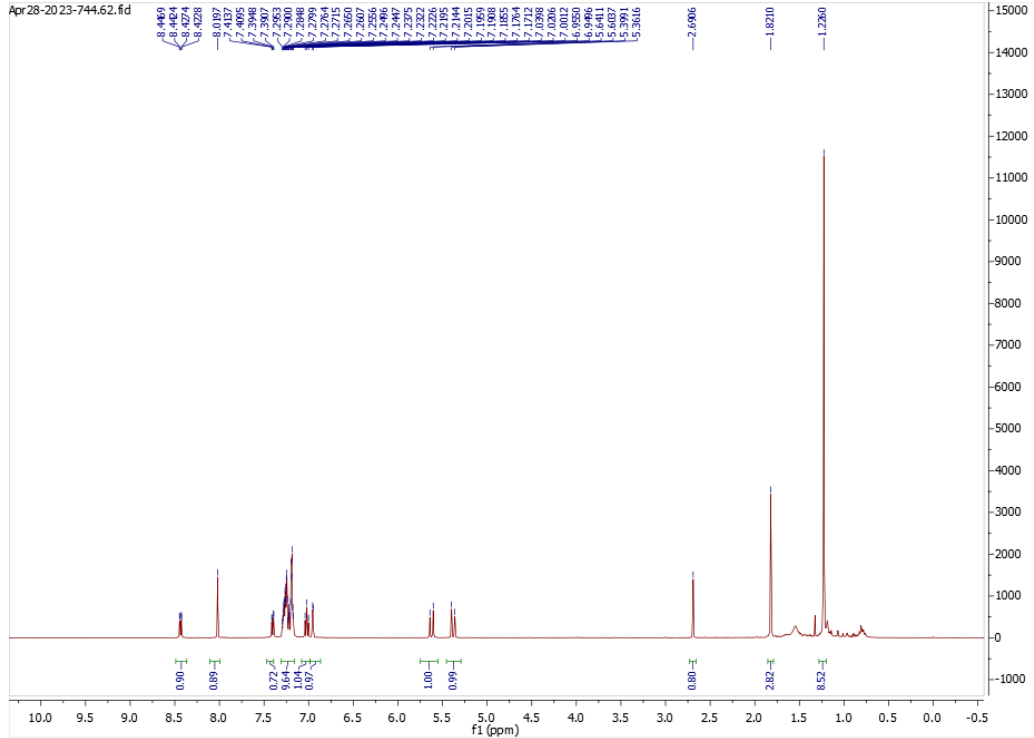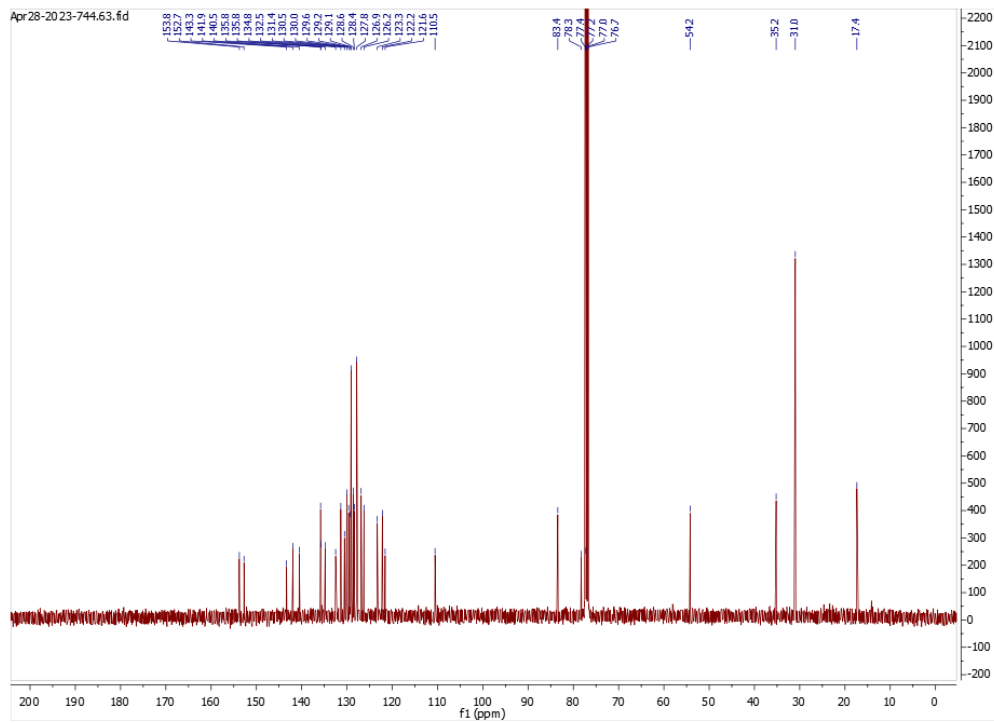

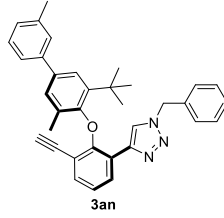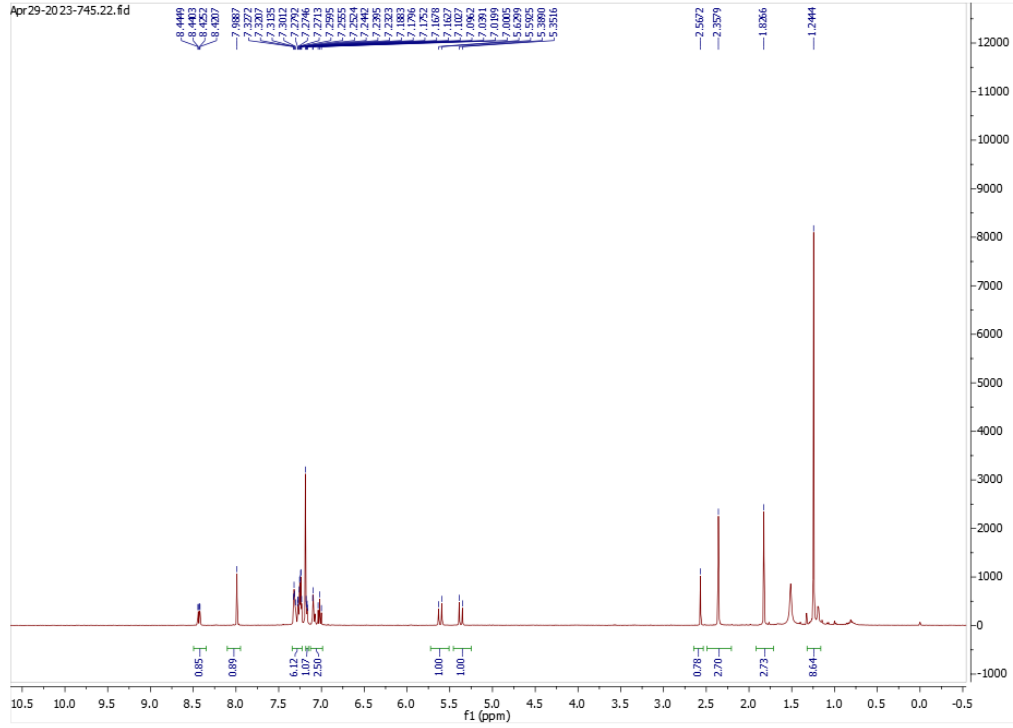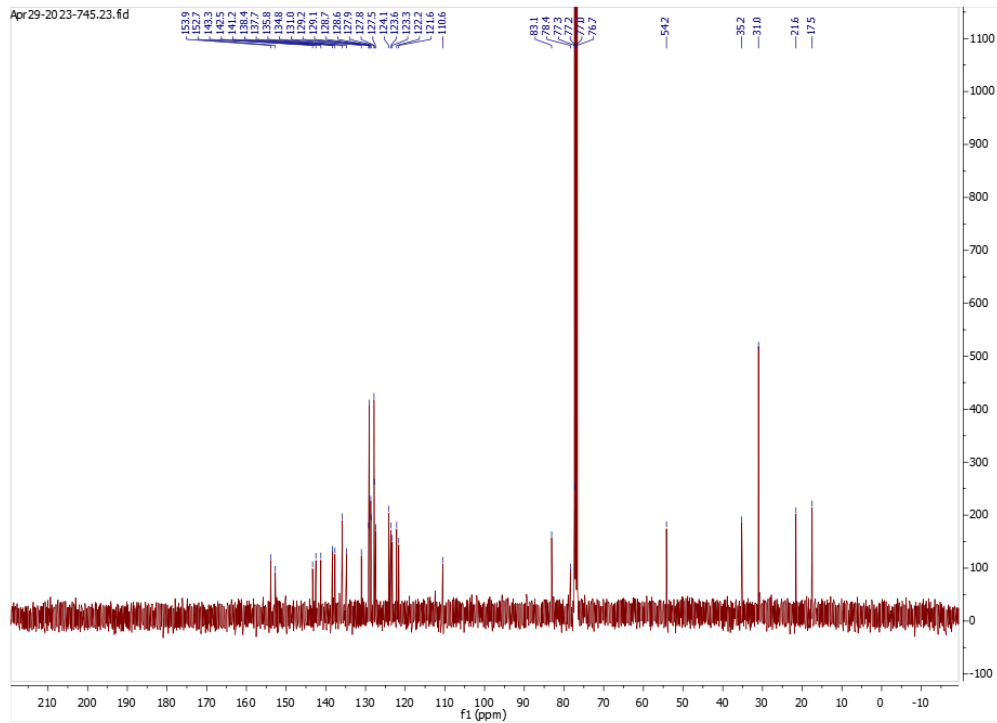

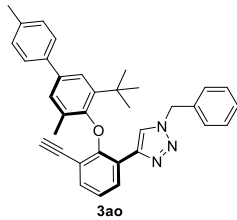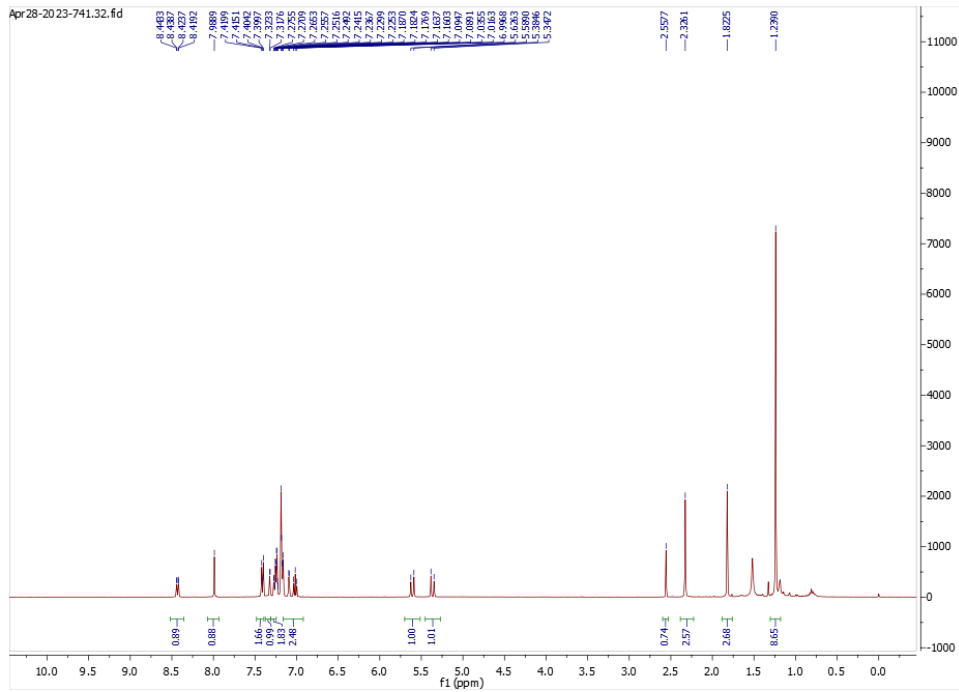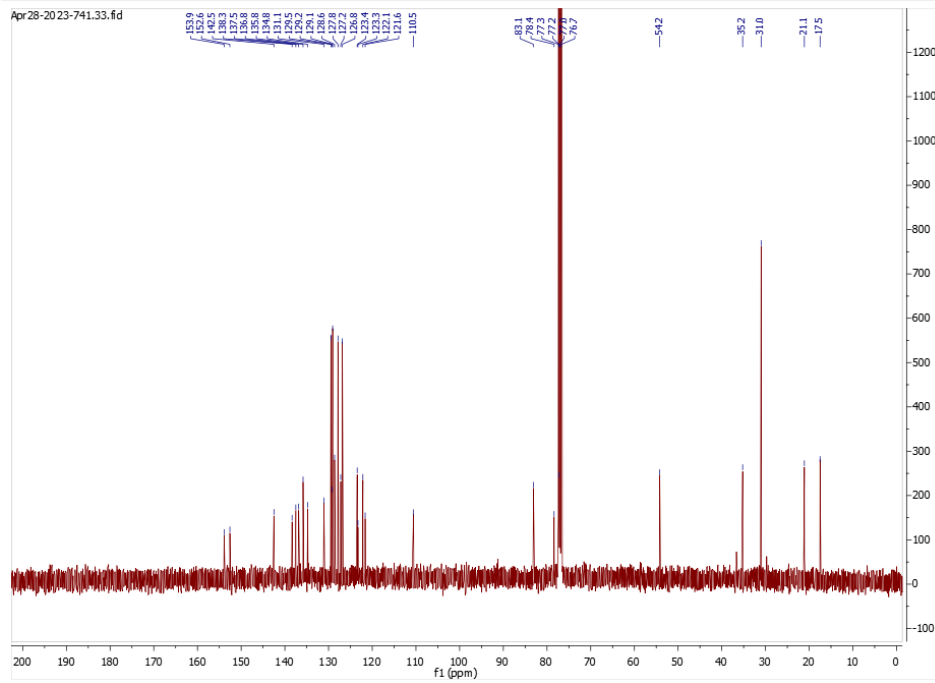



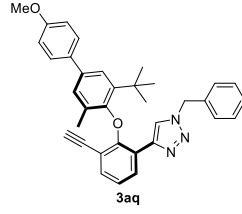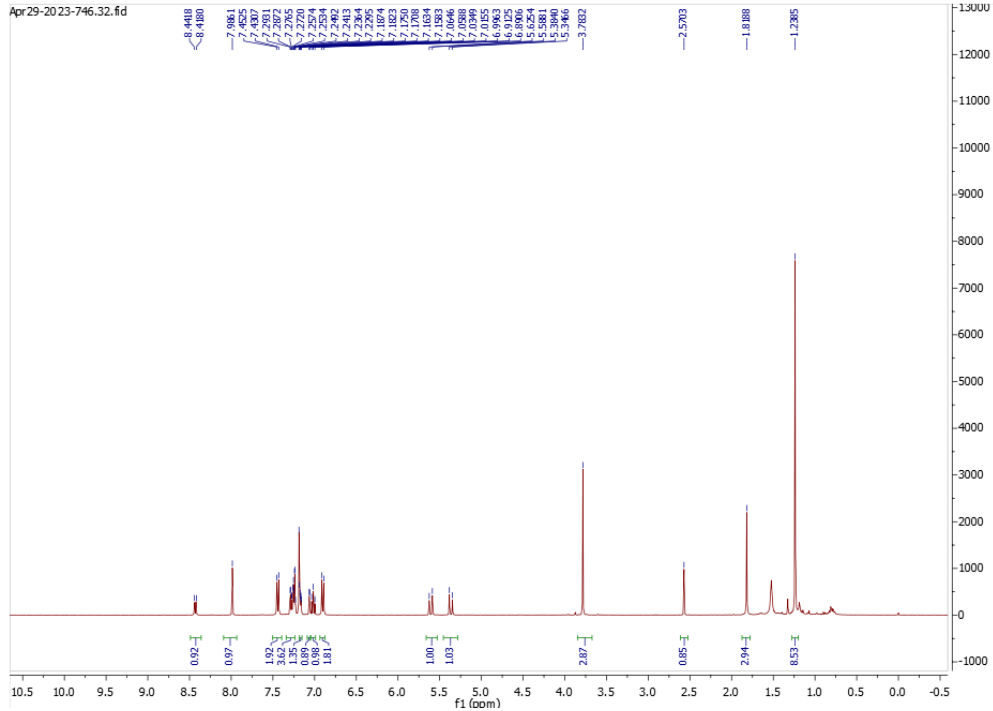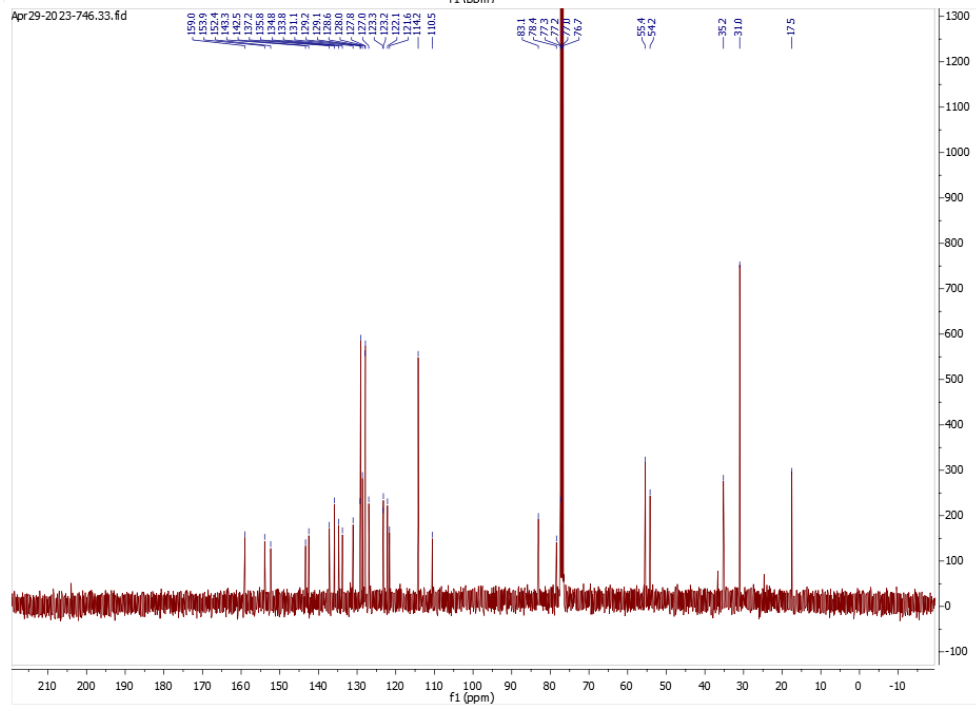

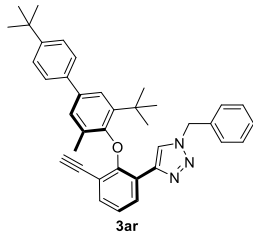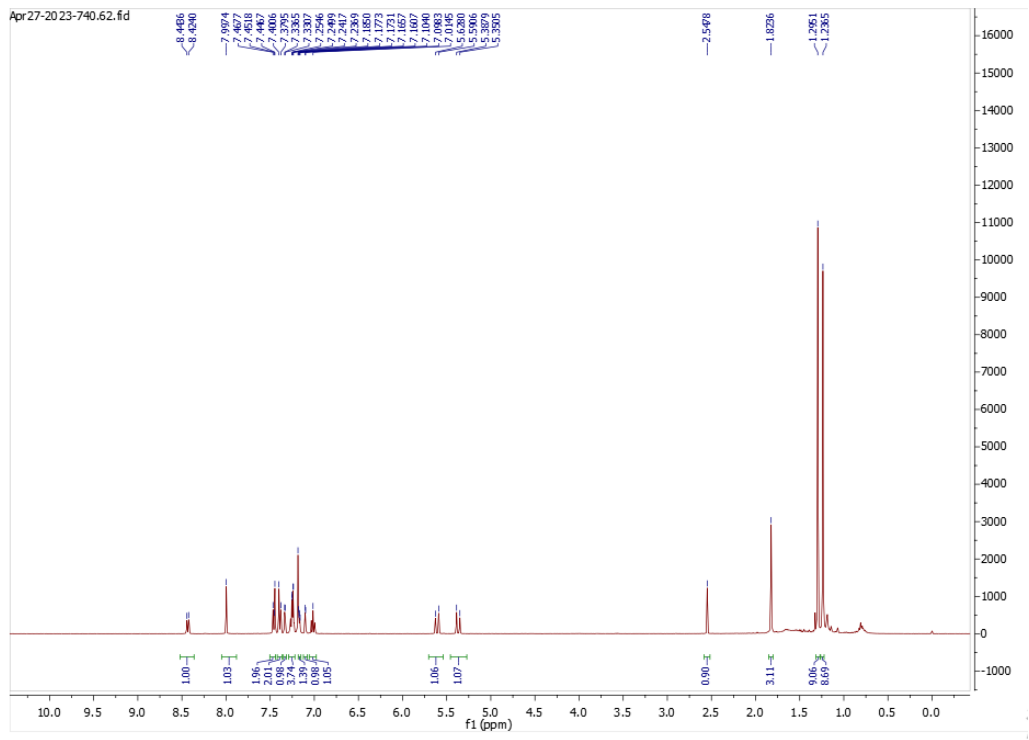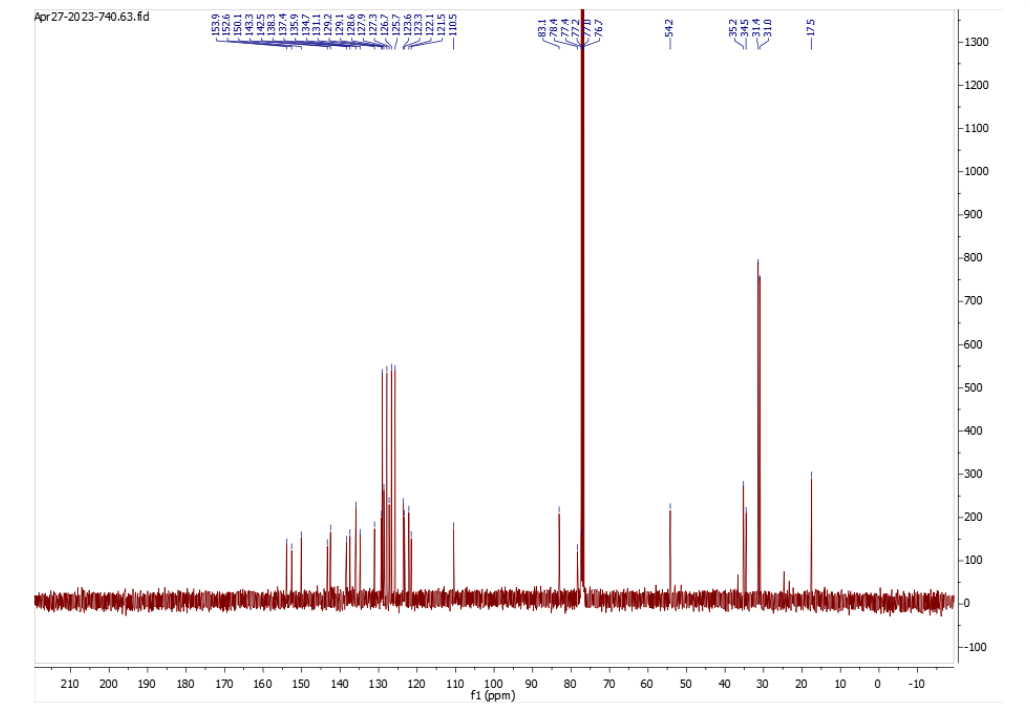

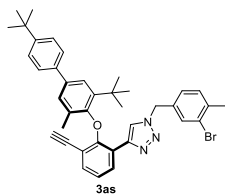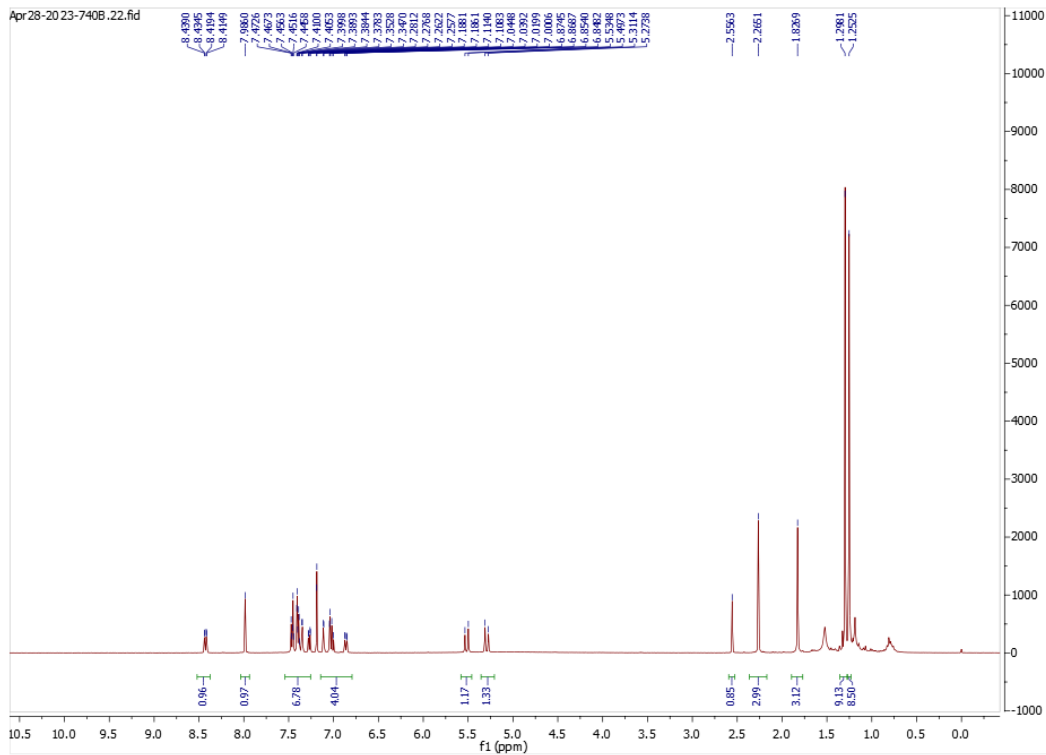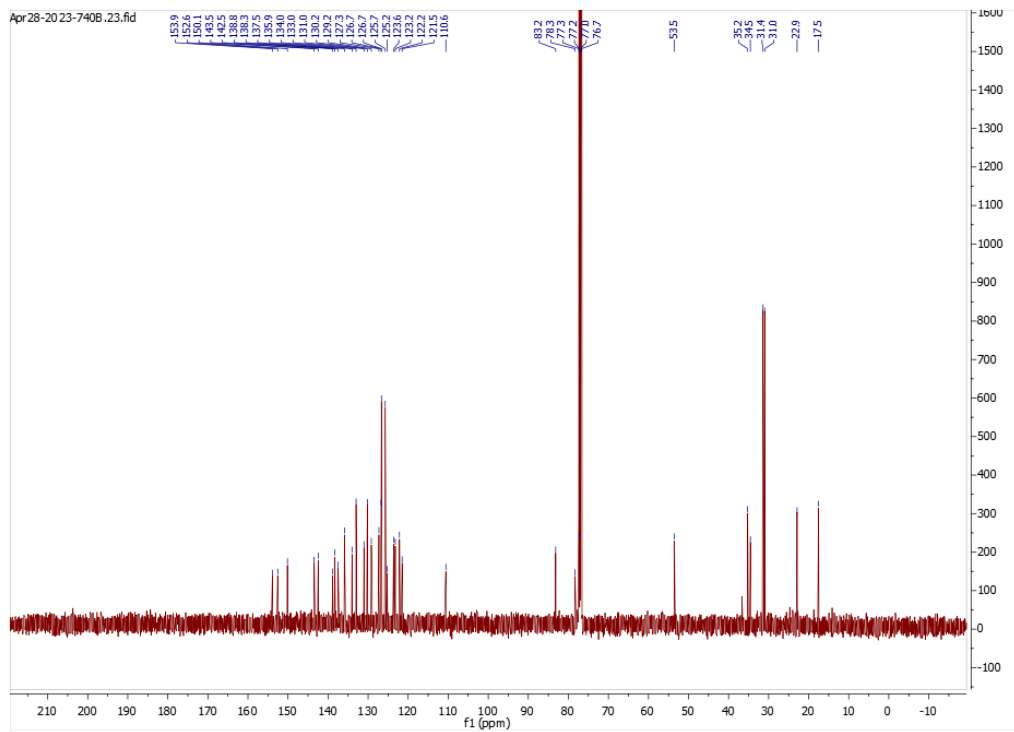





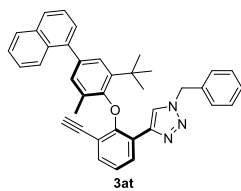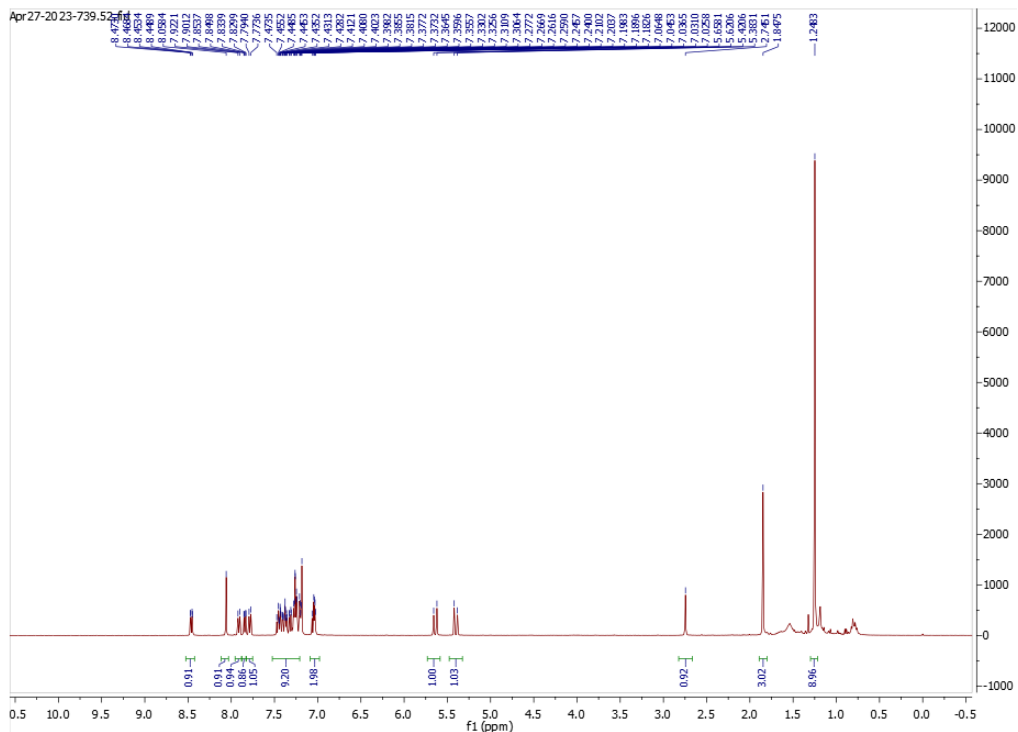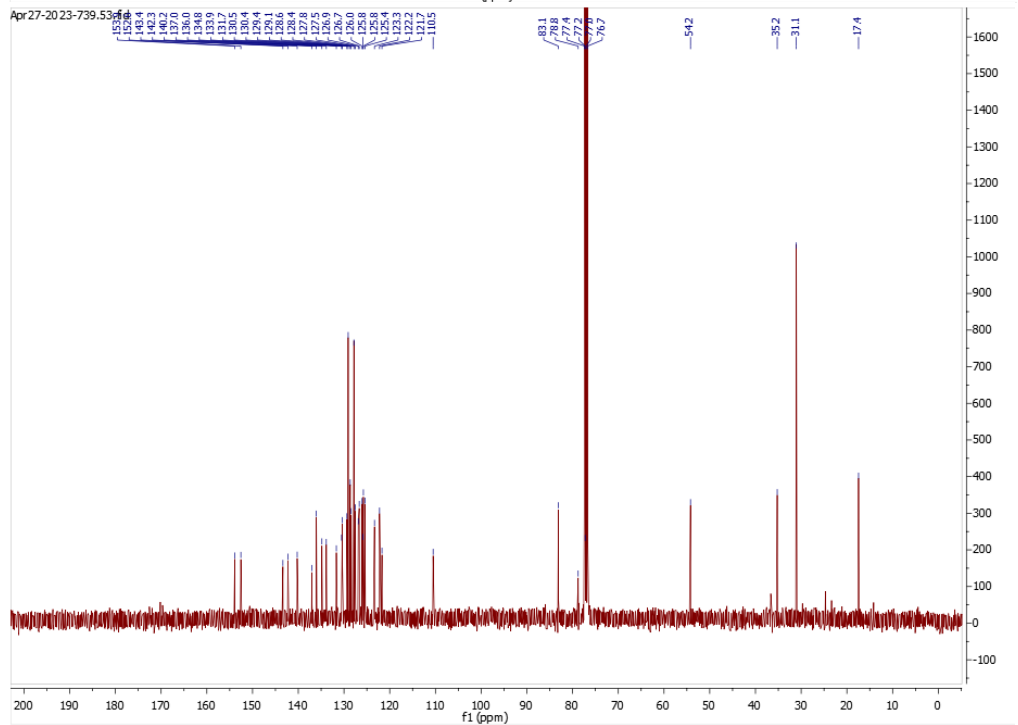

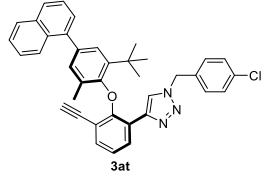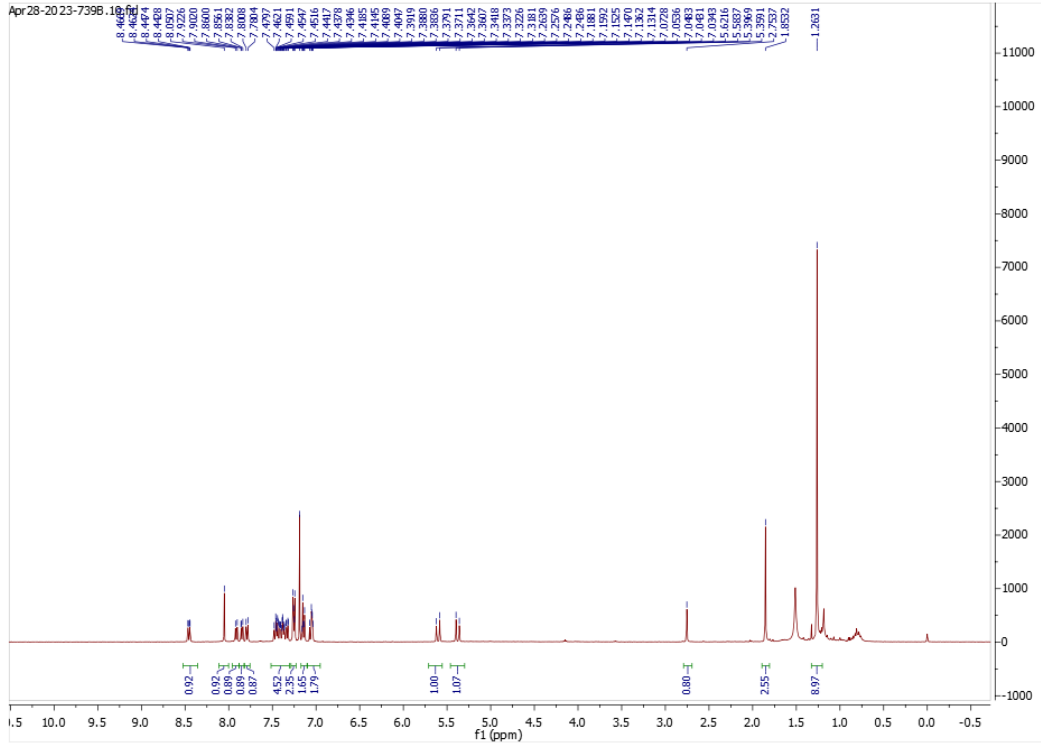

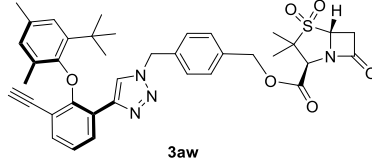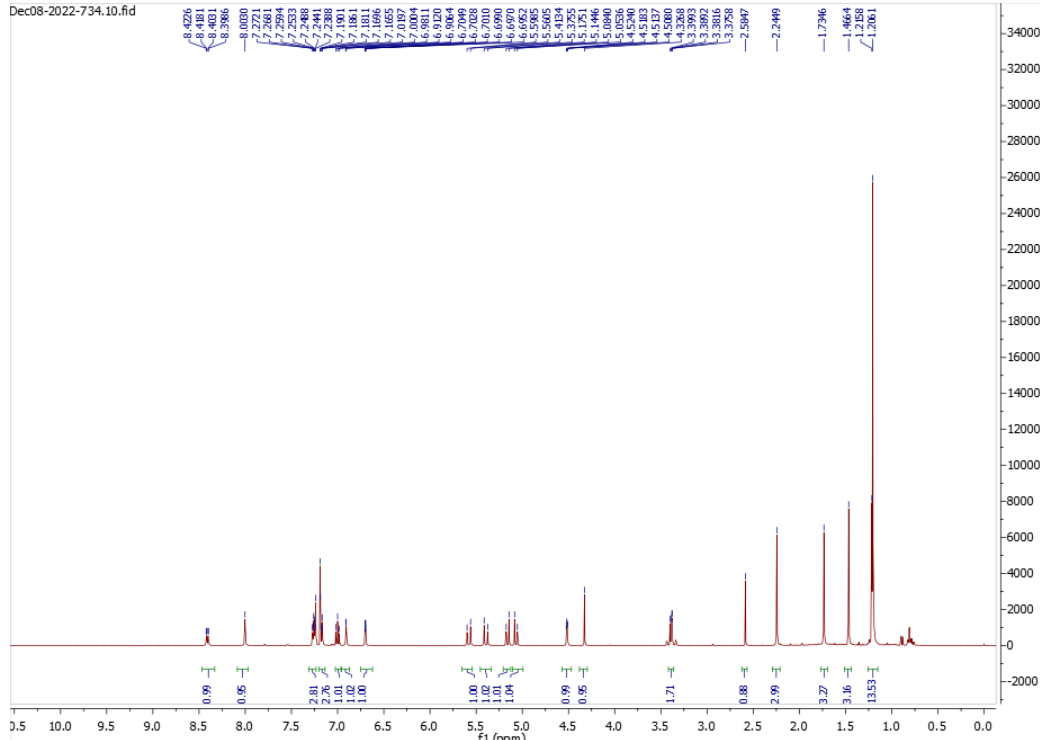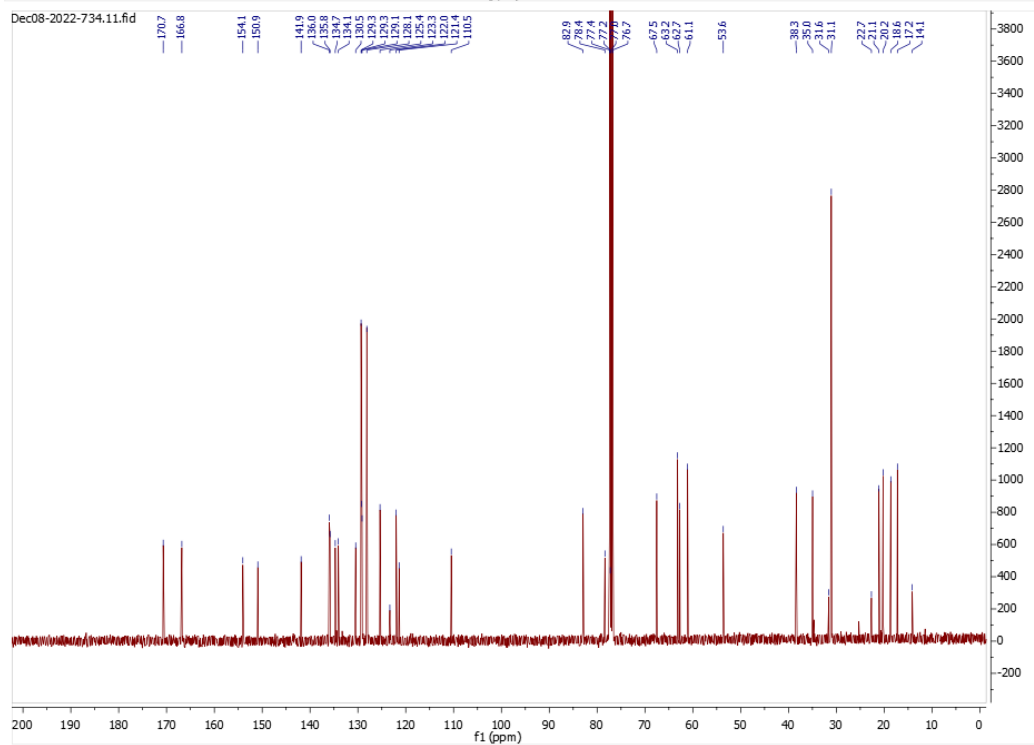

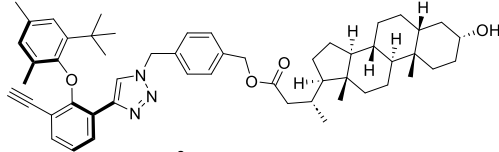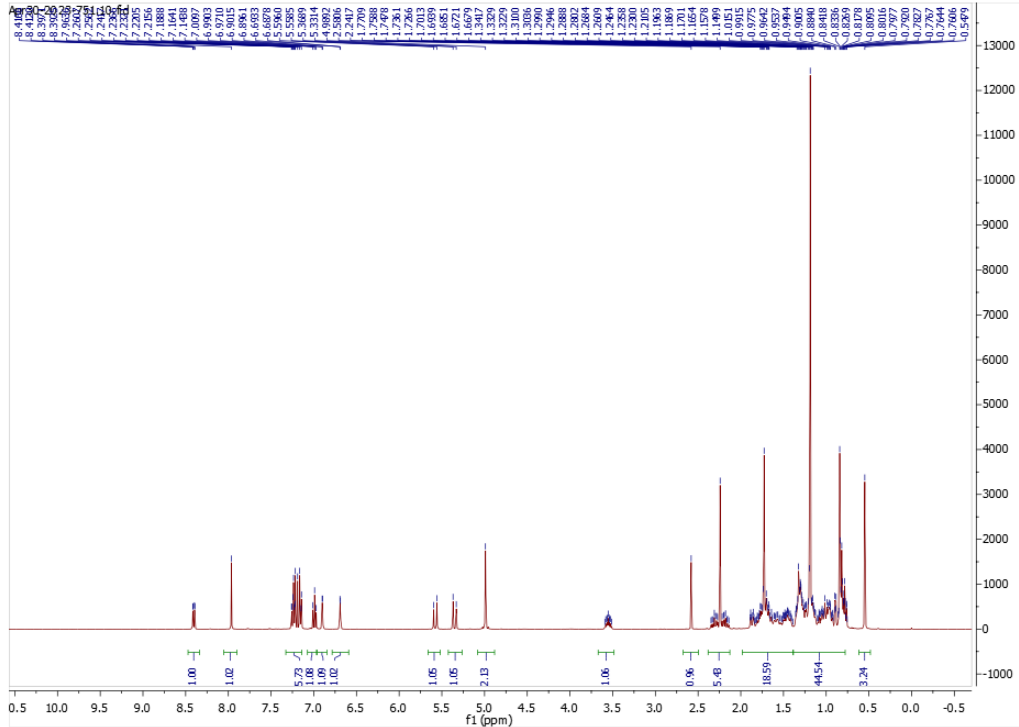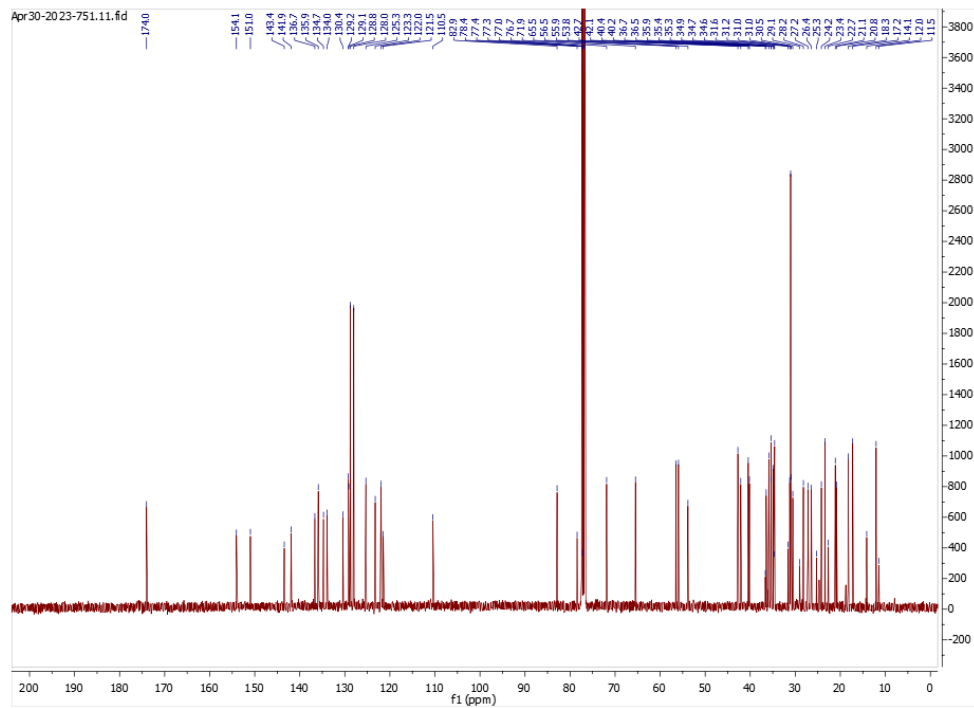

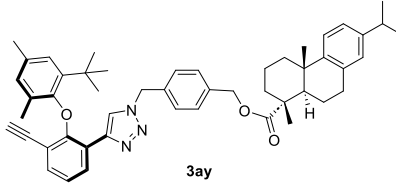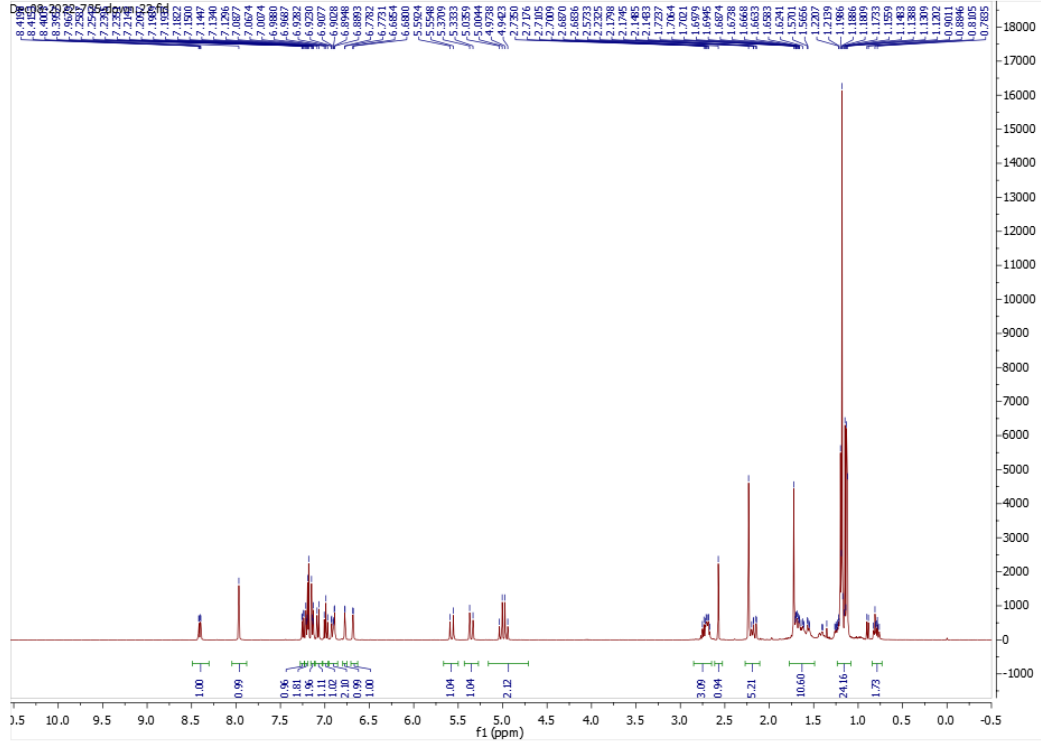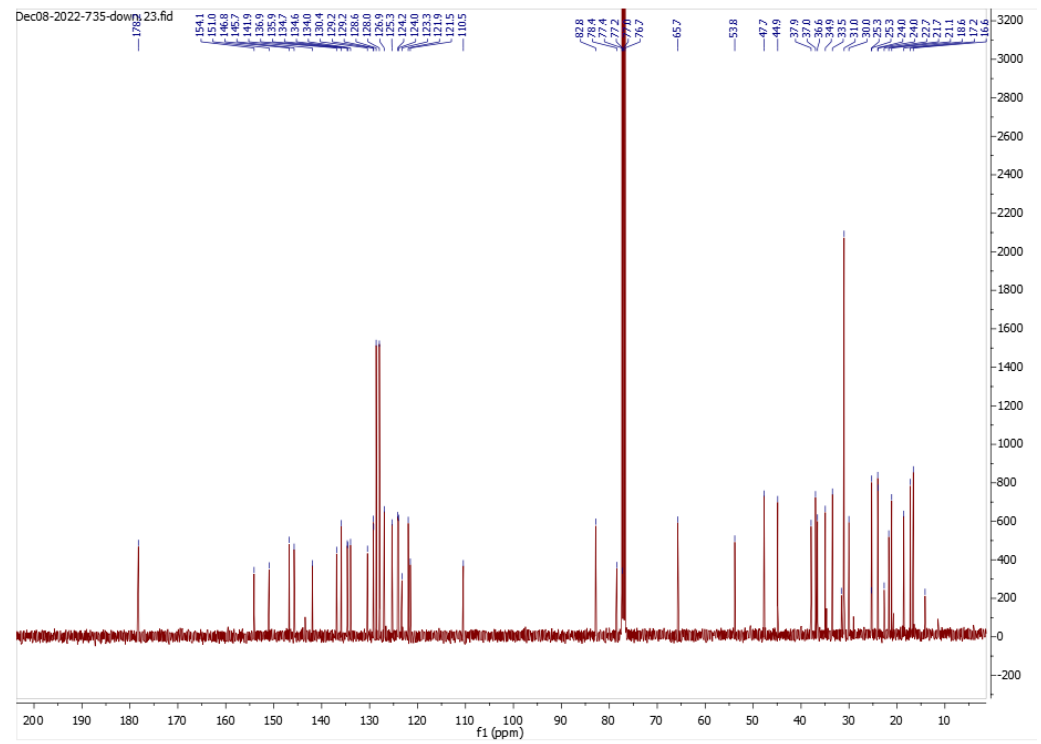



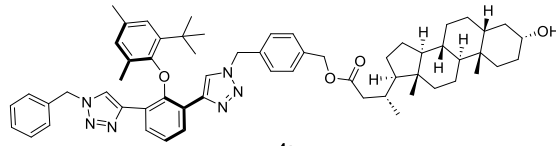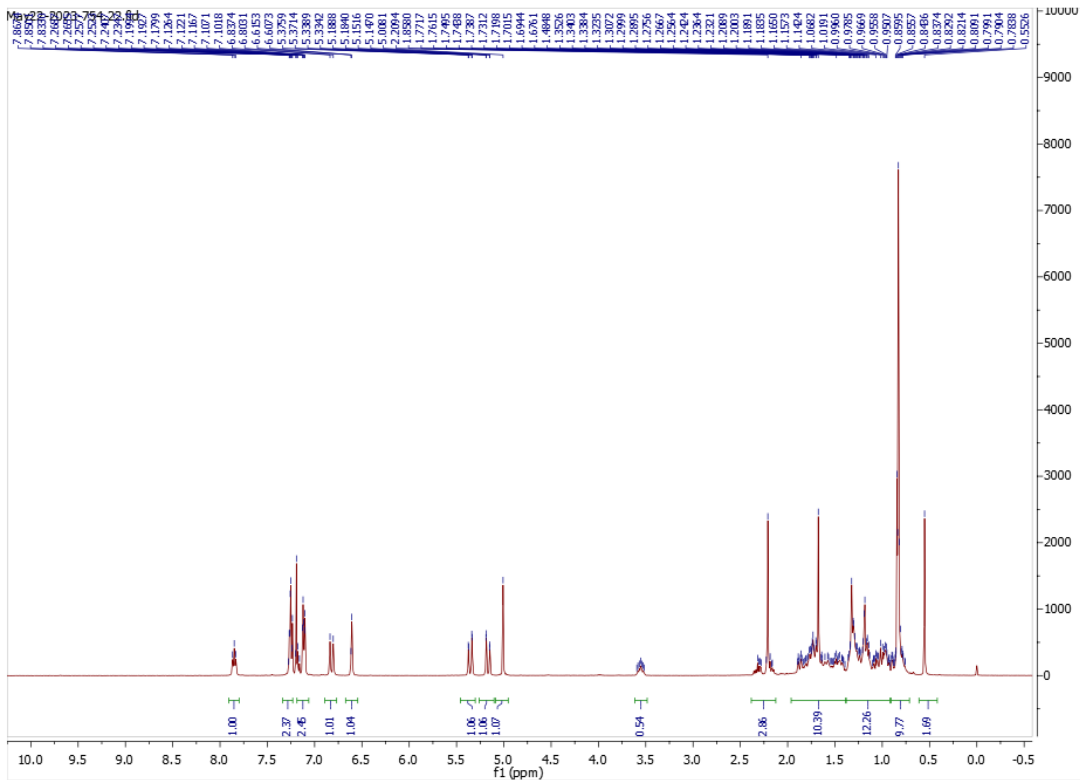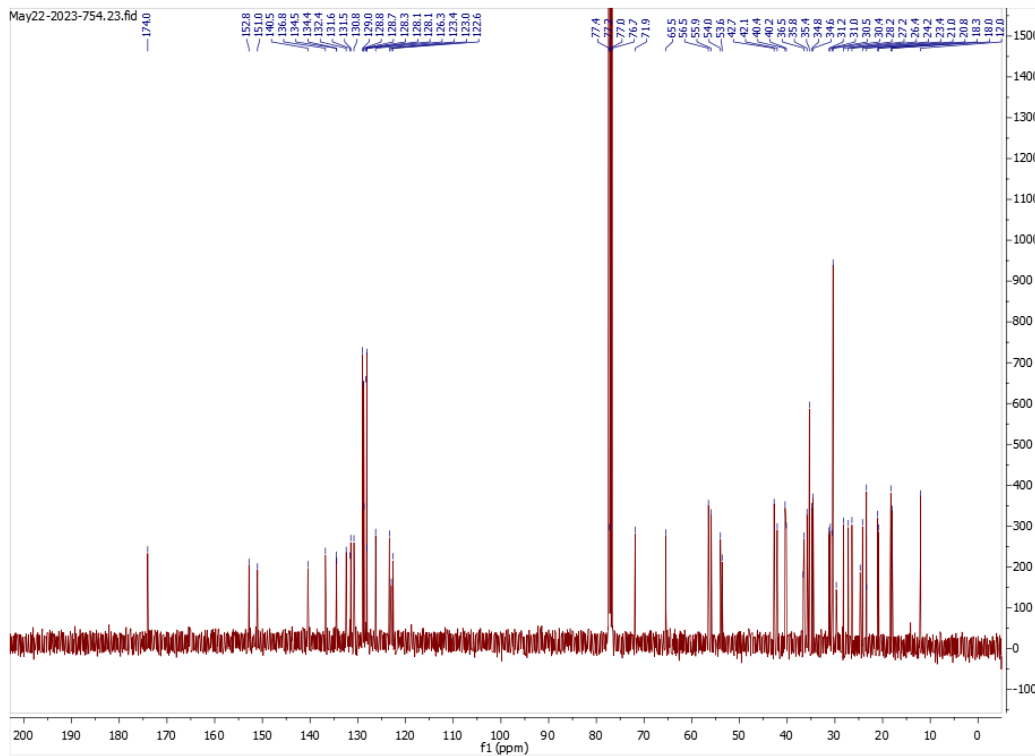









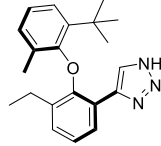

5a

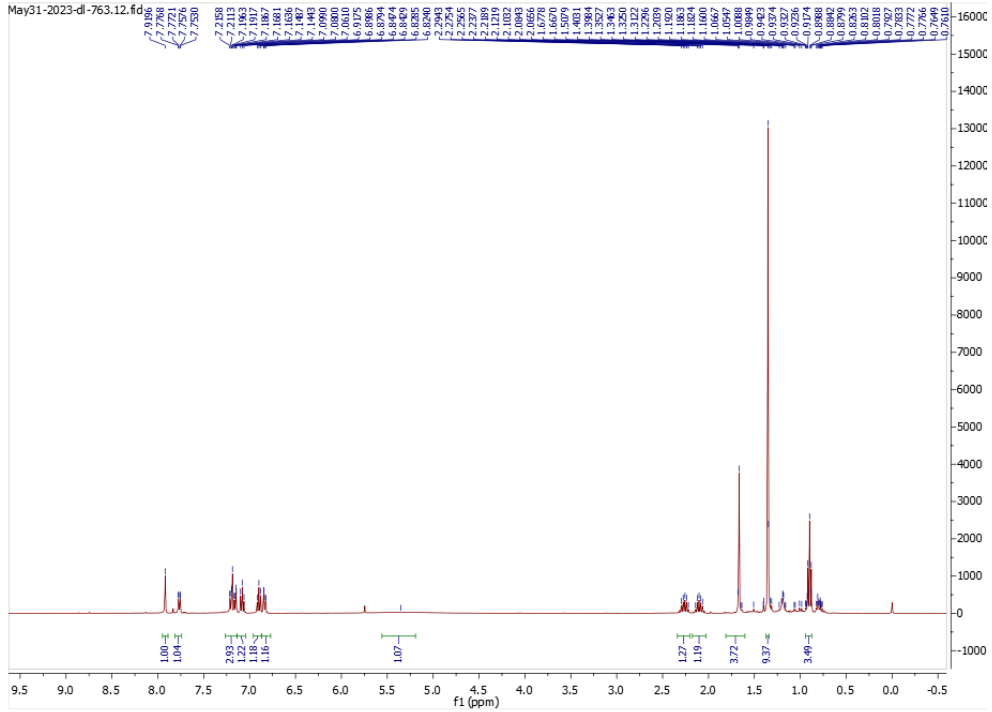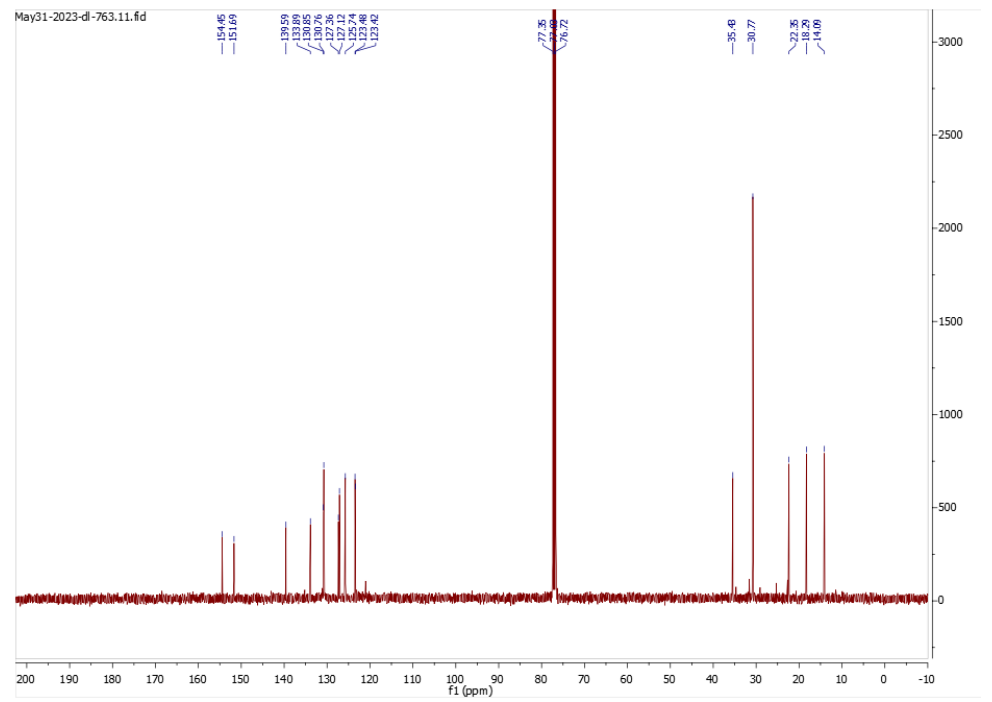

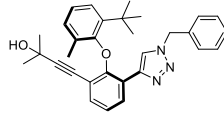

5b

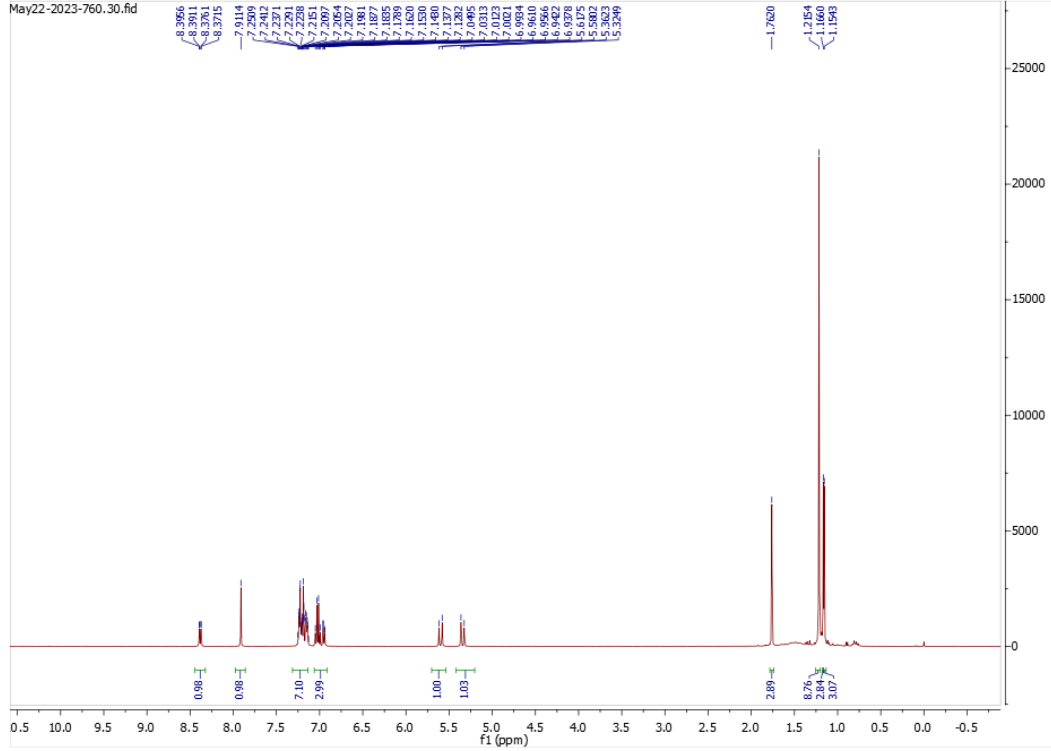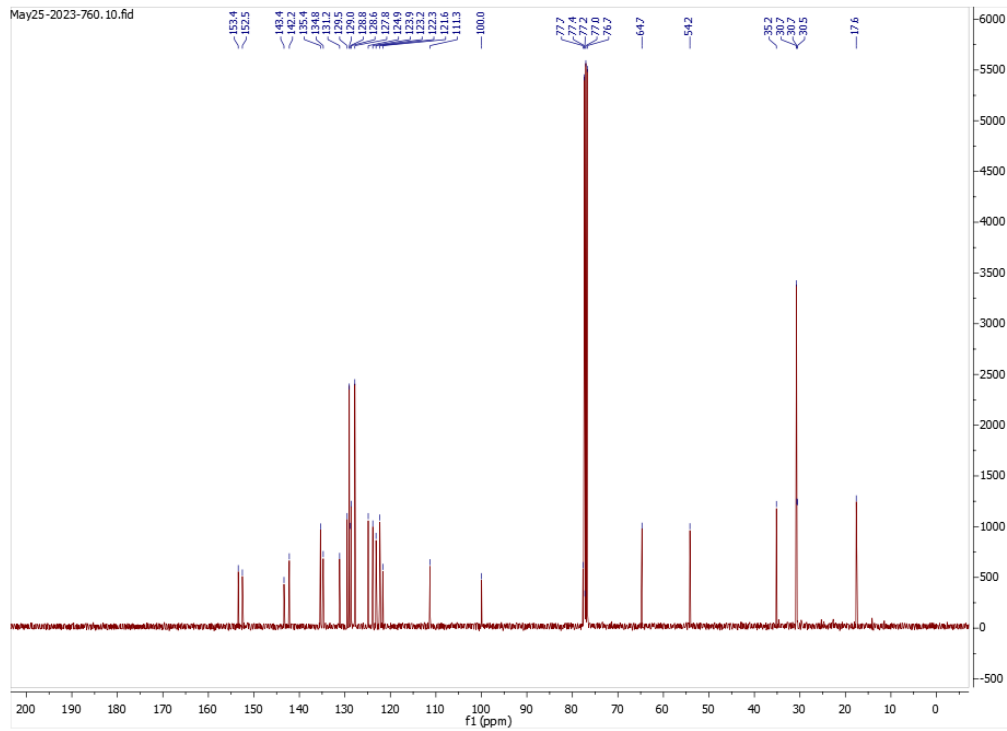

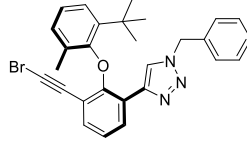

5c

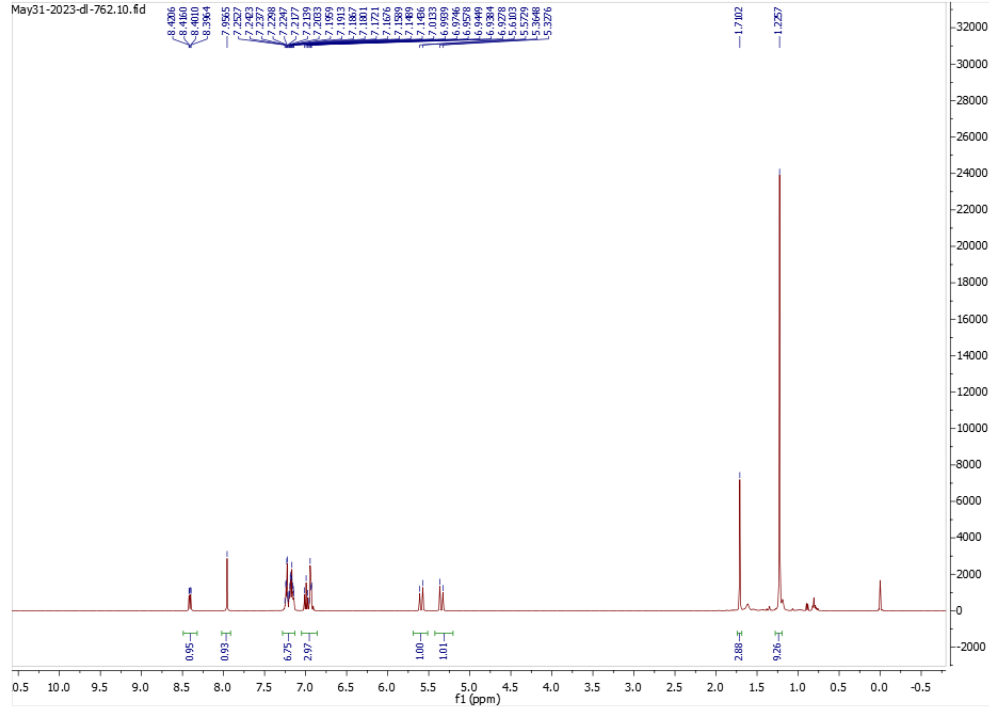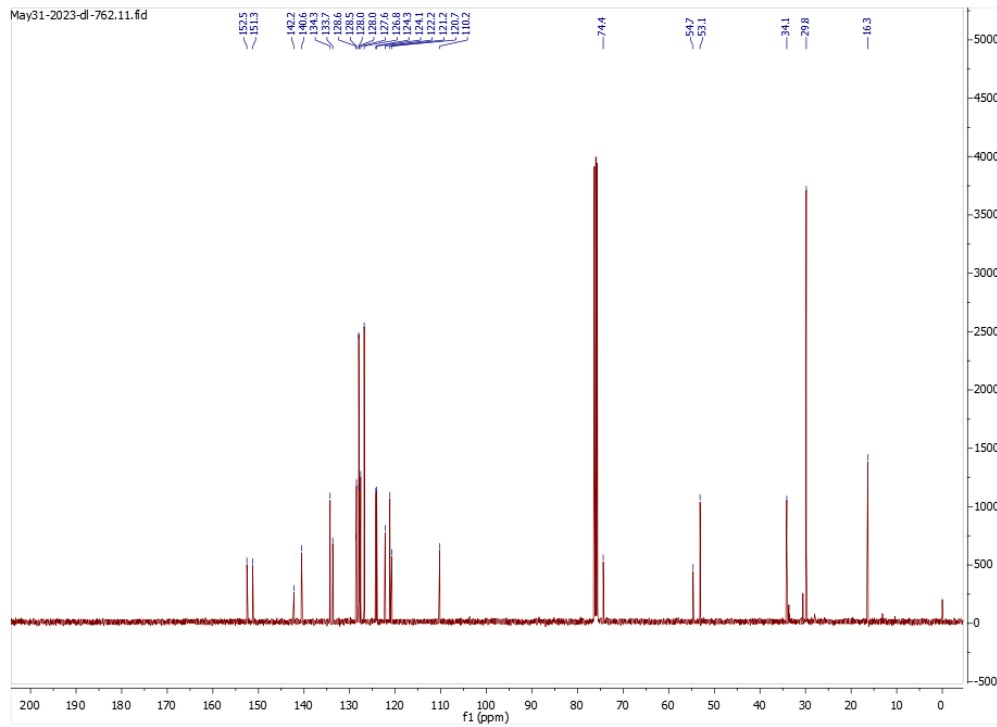

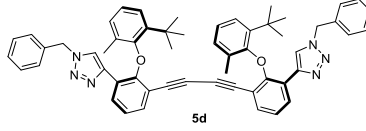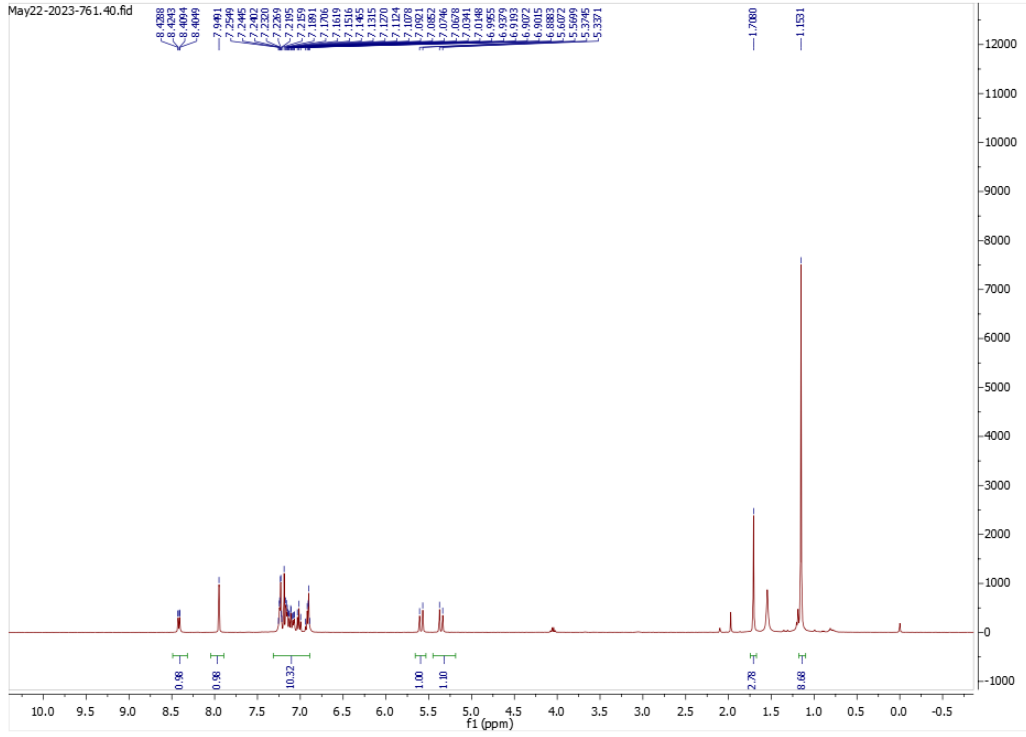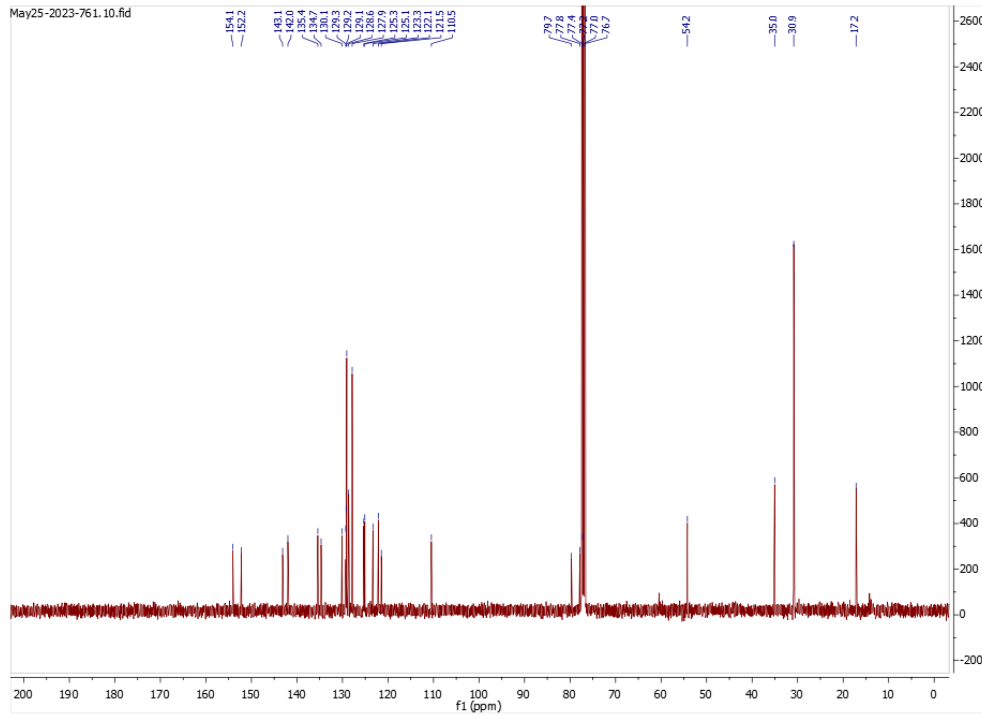

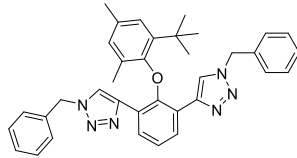

3a'

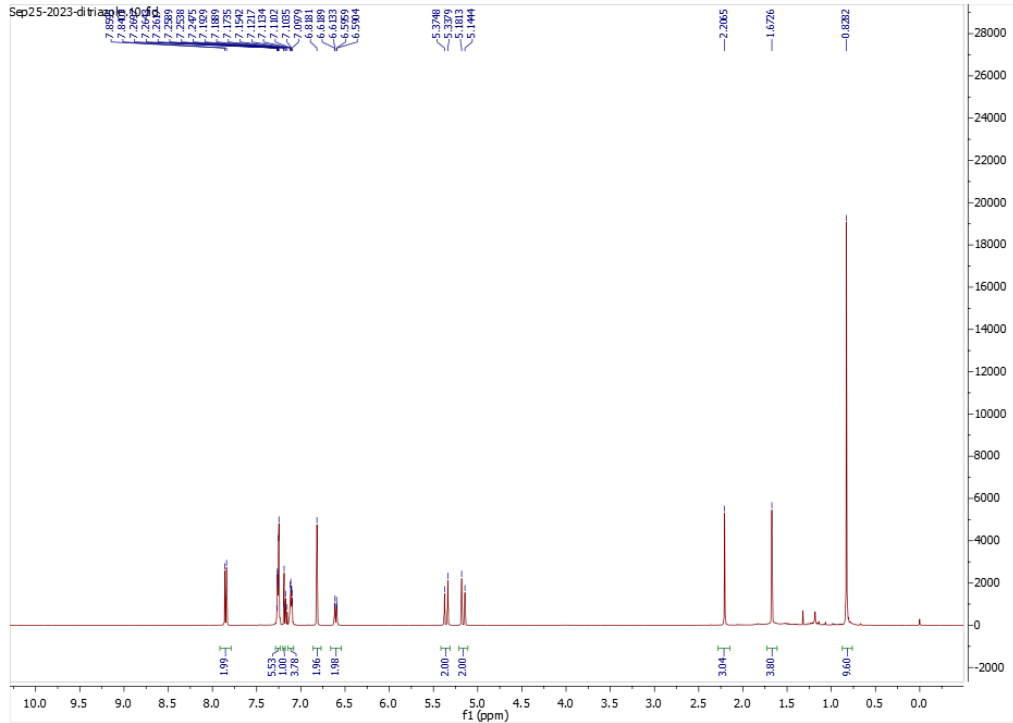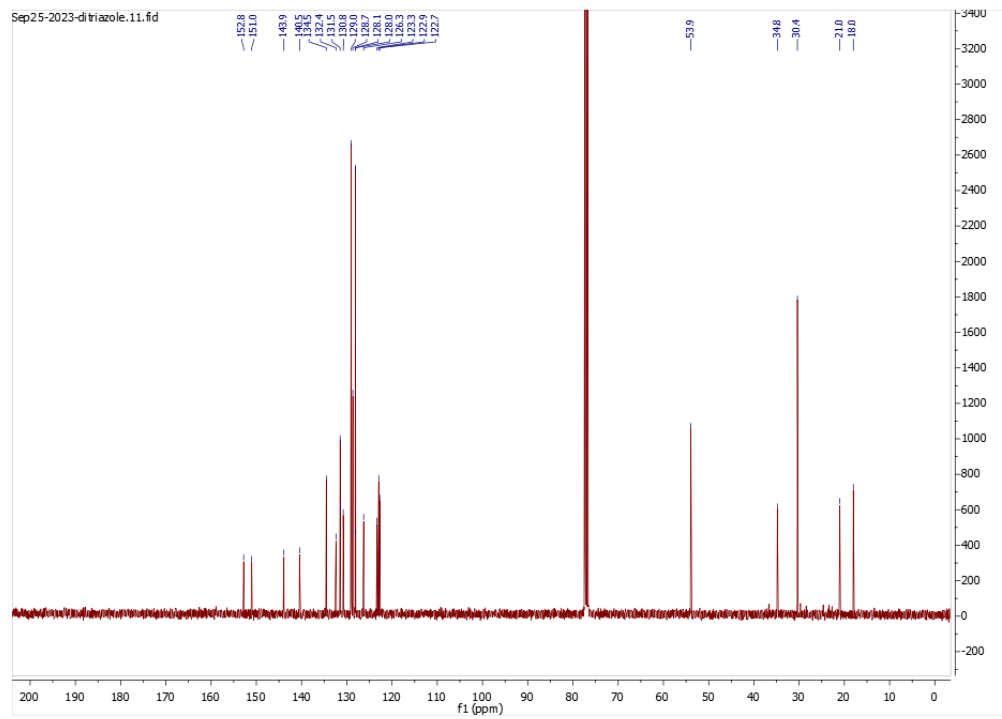

## 10. References

- (1). Yuan, B.; Page, A.; Worrall, C. P.; Escalettes, F.; Willies, S. C.; McDouall, J. J. W.; Turner, N. J.; Clayden, J. Biocatalytic Desymmetrization of an Atropisomer with both an Enantioselective Oxidase and Ketoreductases. *Angew. Chem., Int. Ed.* **2010**, *49*, 7010-7013.
- (2). Dai, L.; Liu, Y.; Xu, Q.; Wang, M.; Zhu, Q.; Yu, P.; Zhong, G.; Zeng, X. A Dynamic Kinetic Resolution Approach to Axially Chiral Diaryl Ethers by Catalytic Atroposelective Transfer Hydrogenation. *Angew. Chem., Int. Ed.* **2023**, *62*, e202216534.
- (3). Bao, H.; Chen, Y.; Yang, X. Catalytic Asymmetric Synthesis of Axially Chiral Diaryl Ethers through Enantioselective Desymmetrization. *Angew. Chem., Int. Ed.* **2023**, *62*, e202300481.
- (4). Shee, S.; Shree Ranganathappa, S.; Gadhave, M. S.; Gogoi, R.; Biju, A. T. Enantioselective Synthesis of C–O Axially Chiral Diaryl Ethers by NHC-Catalyzed Atroposelective Desymmetrization. *Angew. Chem., Int. Ed.* **2023**, *62*, e202311709.
- (5). Zhou, B.-A.; Li, X.-N.; Zhang, C.-L.; Wang, Z.-X.; Ye, S. Enantioselective Synthesis of Axially Chiral Diaryl Ethers via NHC Catalyzed Desymmetrization and Following Resolution. *Angew. Chem., Int. Ed.* **2024**, *63*, e202314228.
- (6). Zeng, L.; Li, J.; Cui, S. Rhodium-Catalyzed Atroposelective Click Cycloaddition of Azides and Alkynes. *Angew. Chem., Int. Ed.* **2022**, *61*, e202205037.
